# Supplementary material for: Intricate Crosstalk Between Lipopolysaccharide, Phospholipid and Fatty Acid Metabolism in Escherichia coli Modulates Proteolysis of LpxC
Source: Front Microbiol. 2019 Jan 14;9:3285. doi: 10.3389/fmicb.2018.03285 (PMC6339880; doi:10.3389/fmicb.2018.03285)
Supplement: Supplementary file 3 [file Table_3.xlsx]

## Sheet: Sheet 2
Protein Ids	Fasta headers	Localization	Loc (short)	30°C interactome	37°C interactome	40°C interactome		FtsH/EV 30°C	p-value	FtsH/EV 37°C	p-value	FtsH/EV 40°C	p-value		FtsH 37/30°C	p-value	FtsH 40/37°C	p-value	FtsH 40/30°C	p-value		Sequence coverage FtsH_30_1 [%]	Sequence coverage FtsH_30_2 [%]	Sequence coverage FtsH_30_3 [%]	Sequence coverage FtsH_37_1 [%]	Sequence coverage FtsH_37_2 [%]	Sequence coverage FtsH_37_3 [%]	Sequence coverage FtsH_40_1 [%]	Sequence coverage FtsH_40_2 [%]	Sequence coverage FtsH_40_3 [%]	Sequence coverage EV_30_1 [%]	Sequence coverage EV_30_2 [%]	Sequence coverage EV_30_3 [%]	Sequence coverage EV_37_1 [%]	Sequence coverage EV_37_2 [%]	Sequence coverage EV_37_3 [%]	Sequence coverage EV_40_1 [%]	Sequence coverage EV_40_2 [%]	Sequence coverage EV_40_3 [%]	Unique peptides FtsH_30_1	Unique peptides FtsH_30_2	Unique peptides FtsH_30_3	Unique peptides FtsH_37_1	Unique peptides FtsH_37_2	Unique peptides FtsH_37_3	Unique peptides FtsH_40_1	Unique peptides FtsH_40_2	Unique peptides FtsH_40_3	Unique peptides EV_30_1
EG10001	>EG10001 alr Alanine racemase	Cytoplasmic	A					n.def	n.def	n.def	n.def	n.def	n.def		n.def	n.def	n.def	n.def	n.def	n.def		0	0	0	0	0	3.9	0	0	0	4.5	4.5	0	0	0	0	3.9	0	0	0	0	0	0	0	1	0	0	0	1
EG10004	>EG10004 dfp Coenzyme A biosynthesis, bifunctional enzyme	Cytoplasmic	A			Yes		0.871132	n.def	6.12731	n.def	FtsH only	FtsH only		n.def	n.def	n.def	n.def	n.def	n.def		0	5.4	10.3	0	17	20	16.7	7.9	23.4	3	0	0	8.9	0	4.9	5.4	3.4	0	0	1	2	0	4	5	4	2	6	1
EG10005	>EG10005 fruB Fructosephosphotransferase enzyme III	Peripheral inner membrane protein facing the cytoplasm	F1					2.24642	0.0110133	4.17859	n.def	3.25141	0.0187821		1.01865	0.93464	0.647685	0.0609423	0.659762	0.104473		5.9	3.5	3.5	3.5	3.5	3.5	3.5	3.5	3.5	9.6	3.5	3.5	0	5.9	3.5	7.2	3.5	3.5	2	1	1	1	1	1	1	1	1	3
EG10011	>EG10011 yaaA Peroxide resistance protein, lowers intracellular iron	Cytoplasmic	A					n.def	n.def	n.def	n.def	n.def	n.def		n.def	n.def	n.def	n.def	n.def	n.def		3.5	0	0	5	0	0	0	0	0	0	0	0	0	0	0	0	5	0	1	0	0	1	0	0	0	0	0	0
EG10012	>EG10012 cydC Glutathione, cysteine export permease/ATP-binding protein	Integral Inner Membrane	B					0.418596	n.def	n.def	n.def	n.def	n.def		n.def	n.def	n.def	n.def	n.def	n.def		0	0	3.5	0	0	1.9	3.5	0	3.5	0	3.5	0	0	0	0	6.1	0	0	0	0	1	0	0	1	1	0	1	0
EG10015	>EG10015 rodZ Cytoskeletal protein required for MreB assembly	Nucleoid, Integral Inner Membrane	N,B	Yes	Yes	Yes		4.93874	0.0303024	6.53994	0.00358398	FtsH only	FtsH only		0.720759	0.0796191	0.685581	0.0402832	0.494139	0.00945778		22.8	17.5	19	17.5	22.8	27.9	22.8	10.7	10.4	13.1	9.2	10.4	13.6	9.8	10.4	9.2	13.6	13.6	6	4	5	5	6	8	6	3	3	3
EG10017	>EG10017 ispB Octaprenyl diphosphate synthase, isoprenoid biosynthesis	Cytoplasmic	A					8.75118	n.def	8.3692	n.def	17.9231	n.def		n.def	n.def	n.def	n.def	n.def	n.def		10.8	10.8	4	11.1	4.3	6.8	0	0	10.8	4.3	4	11.1	11.1	4.3	15.2	10.8	8.4	8.4	2	2	1	2	1	1	0	0	2	1
EG10018	>EG10018 csrD Targeting factor for csrBC sRNA degradation by RNase E	Integral Inner Membrane	B					n.def	n.def	0.72175	n.def	n.def	n.def		n.def	n.def	n.def	n.def	n.def	n.def		0	0	0	0	2.2	2.2	0	0	0	1.7	0	2.2	0	0	2.2	0	0	0	0	0	0	0	1	1	0	0	0	1
EG10020	>EG10020 cpxR Response regulator, periplasmic stress response	Nucleoid, Peripheral inner membrane protein facing the cytoplasm	N,F1					0.8745	0.904509	1.41341	0.172493	0.711531	0.293317		0.853198	0.681728	0.760459	0.360379	0.648822	0.106127		8.6	23.7	26.3	23.3	23.3	16.8	23.3	8.6	22.4	4.3	8.6	16.8	23.3	8.6	16.8	23.7	21.1	23.3	2	5	6	4	4	3	4	2	4	1
EG10021	>EG10021 yjiA Predicted GTPase, binds GTP, function unknown	Cytoplasmic	A			Yes		1.59312	0.194015	2.4271	0.0767743	2.27666	0.00884749		1.46966	0.0942049	0.622586	0.0495242	0.914993	0.656112		11.6	11.6	11.6	11.6	11.6	13.8	18.6	11.6	11.6	9.4	7.9	7.9	9.1	2.5	11.6	11.6	11.6	11.6	3	3	3	3	3	4	4	3	3	3
EG10022	>EG10022 aceA Isocitrate lyase, acetate utilization, glyoxylate shunt	Peripheral inner membrane protein facing the cytoplasm	F1					1.86624	n.def	1.24439	0.187494	n.def	n.def		0.810339	0.322551	0.622085	0.078635	0.504099	0.0210522		8.5	3.5	3.5	6	6	8.3	3.5	3.5	6	5.5	5.8	5.8	6	8.3	8.3	6	5.8	3.5	3	1	1	2	2	3	1	1	2	2
EG10024	>EG10024 aceE Pyruvate dehydrogenase, decarboxylase component E1	Peripheral inner membrane protein facing the cytoplasm	F1	Yes	Yes	Yes		3.1222	0.0443775	4.25745	0.00168888	6.62157	0.000187412		0.92575	0.848563	0.867567	0.611387	0.803151	0.416614		42.8	56.7	54.6	55.4	48	39	52.5	43.9	44.8	42.1	52.5	54.8	45.9	52.4	52.8	46	54.8	51	29	39	36	34	30	25	33	27	30	32
EG10025	>EG10025 aceF Pyruvate dehydrogenase, dihydrolipoamide acetyltransferase E2	Peripheral inner membrane protein facing the cytoplasm	F1	Yes	Yes	Yes		5.55606	0.015579	17.0114	0.00790627	16.3934	0.0157531		1.17707	0.433739	0.747373	0.0245681	0.879712	0.468649		44.3	54.4	50.3	50.6	47.5	44	48.9	44.6	51	45.7	48.7	44.4	45.6	44.8	47.9	46	50.8	44.3	18	31	25	23	24	21	23	20	25	21
EG10027	>EG10027 ackA Acetate kinase, produces acetyl phosphate	Peripheral inner membrane protein facing the cytoplasm	F1		Yes	Yes		2.30605	0.0612412	3.20036	0.00342519	3.43305	0.0120418		0.934635	0.830631	0.809226	0.430319	0.756331	0.0697391		21.5	43.2	33.2	43.2	40.2	33.2	36.2	24.5	36.2	21.5	28.8	43.2	32.2	24.5	40.2	40.2	26.5	33.2	5	9	7	9	8	7	8	6	8	6
EG10028	>EG10028 pflA Pyruvate formate lyase I activase	Cytoplasmic	A	Yes	Yes	Yes		3.53218	0.0411507	2.46892	3.05541e-05	FtsH only	FtsH only		1.21353	0.209378	1.09712	0.599128	1.33139	0.141774		8.1	14.6	14.6	24.8	14.6	8.1	35.4	8.1	14.6	14.6	8.1	8.1	14.6	8.1	14.6	3.7	8.1	3.7	2	3	3	4	3	2	6	2	3	3
EG10030	>EG10030 add Adenosine deaminase	Peripheral inner membrane protein facing the cytoplasm	F1					n.def	n.def	n.def	n.def	n.def	n.def		n.def	n.def	n.def	n.def	n.def	n.def		15.3	17.7	0	9.9	0	3.3	7.8	0	0	0	0	0	0	0	0	0	0	0	3	4	0	3	0	1	1	0	0	0
EG10031	>EG10031 adhE Alcohol dehydrogenase, largely anaerobic	Peripheral inner membrane protein facing the cytoplasm	F1		Yes	Yes		3.09586	0.0751784	4.99639	0.00631552	6.71052	0.00467473		1.04243	0.91249	0.827006	0.593191	0.862097	0.38623		14.5	29.9	21.1	25.1	24.8	24.5	27.5	30.8	29.1	21.7	17.2	24.4	18.6	20.1	16.9	15.6	25.6	22.1	9	17	13	15	15	14	17	18	17	13
EG10032	>EG10032 adk Adenylate kinase	Peripheral inner membrane protein facing the cytoplasm	F1					0.451028	0.259598	0.219762	0.0313754	0.214121	0.310349		0.988926	0.984378	0.905611	0.875879	0.895582	0.867048		48.6	56.5	56.5	51.4	56.5	46.3	56.5	46.7	51.9	35.5	49.1	41.1	36.4	46.7	49.1	33.2	51.4	36	8	9	9	8	9	7	9	8	8	6
EG10033	>EG10033 agp Periplasmic glucose-1-phosphatase, acidic	Periplasmic	G					n.def	n.def	2.08515	n.def	n.def	n.def		n.def	n.def	n.def	n.def	n.def	n.def		2.9	2.9	2.9	0	0	2.9	0	0	0	0	2.9	2.9	2.9	2.9	2.9	2.9	6.1	2.9	1	1	1	0	0	1	0	0	0	0
EG10034	>EG10034 alaS Alanine--tRNA ligase	Nucleoid, Peripheral inner membrane protein facing the cytoplasm	N,F1		Yes	Yes		11.5472	0.122145	12.6034	0.0203711	10.2018	0.0241535		0.867186	0.637764	0.853339	0.387783	0.740004	0.224739		14.8	42.4	46.9	45.3	40.4	38.2	44.3	40.6	42.9	30.4	41.7	45	45.4	41.6	42.8	41.8	43.2	33.8	12	29	32	33	30	27	32	29	31	22
EG10035	>EG10035 aldA Aldehyde dehydrogenase, NAD-dependent	Cytoplasmic	A					n.def	n.def	n.def	n.def	n.def	n.def		n.def	n.def	n.def	n.def	n.def	n.def		1.9	0	0	0	0	0	1.9	2.7	2.7	0	0	0	0	1.9	0	0	0	0	1	0	0	0	0	0	1	1	1	0
EG10039	>EG10039 amn AMP nucleosidase	Cytoplasmic	A					3.50969	n.def	n.def	n.def	n.def	n.def		0.395811	0.224404	1.0701	0.886116	0.423557	0.0069641		3.7	4.8	13.6	4.8	4.8	8.5	8.5	6.2	4.8	2.5	0	8.5	8.5	3.7	9.9	8.5	4.8	9.9	1	1	3	1	1	2	2	2	1	1
EG10043	>EG10043 cysQ 3-phosphoadenosine 5-phosphate (pAp) phosphatase	Peripheral inner membrane protein facing the cytoplasm	F1					1.85507	n.def	1.03826	n.def	0.365844	n.def		n.def	n.def	n.def	n.def	n.def	n.def		0	0	4.5	4.5	3.7	8.9	0	0	3.7	3.7	4.5	4.5	0	0	4.5	0	4.5	4.5	0	0	1	1	1	1	0	0	1	1
EG10045	>EG10045 ansA L-Asparaginase I	Cytoplasmic	A	Yes		Yes		FtsH only	FtsH only	2.06239	n.def	FtsH only	FtsH only		n.def	n.def	n.def	n.def	0.684404	0.0364124		8.6	12.1	8.6	7.7	4.1	21.3	16.9	12.1	7.7	0	4.1	12.1	7.7	3.6	7.7	3.6	3.6	0	2	3	2	2	1	4	3	3	2	0
EG10048	>EG10048 apaH Dinucleoside tetraphosphatase, symmetrical	Cytoplasmic	A					n.def	n.def	n.def	n.def	n.def	n.def		n.def	n.def	n.def	n.def	n.def	n.def		3.2	0	0	0	0	0	0	0	0	0	0	0	0	0	0	0	0	0	1	0	0	0	0	0	0	0	0	0
EG10051	>EG10051 apt Adenine phosphoribosyltransferase	Cytoplasmic	A					1.04374	0.877114	0.870942	0.525985	0.587711	0.06462		0.919863	0.69571	0.651623	0.0675403	0.599403	0.0674724		48.1	60.7	41.5	56.8	48.1	33.9	33.9	30.1	41.5	20.2	50.3	41.5	41.5	43.2	54.1	48.1	41.5	41.5	6	7	5	6	6	4	4	4	5	3
EG10054	>EG10054 araC Transcriptional activator for the ara regulon	Nucleoid	N					n.def	n.def	n.def	n.def	n.def	n.def		n.def	n.def	n.def	n.def	n.def	n.def		0	0	0	0	0	0	4.1	0	4.1	0	0	0	0	0	0	0	0	0	0	0	0	0	0	0	1	0	1	0
EG10061	>EG10061 arcA Response regulator, represses aerobic genes during anaerobic growth	Nucleoid, Peripheral inner membrane protein facing the cytoplasm	N,F1		Yes			2.51538	0.12092	FtsH only	FtsH only	1.041	0.927689		1.30095	0.448524	0.79014	0.13221	1.02793	0.921921		16.4	28.6	7.6	21	7.6	8.4	21	8.4	21	7.6	13.4	2.9	15.5	7.6	10.9	7.6	15.5	8.4	4	6	2	4	2	2	4	2	4	2
EG10062	>EG10062 arcB Aerobic respiration control sensor histidine protein kinase	Integral Inner Membrane	B					0.546854	n.def	1.51379	n.def	1.30846	n.def		n.def	n.def	n.def	n.def	n.def	n.def		1.4	3.3	1.4	0	1.9	1.9	1.4	1.4	0	1.7	2.8	1.4	0	1.4	1.7	0	1.4	1.7	1	2	1	0	1	1	1	1	0	1
EG10064	>EG10064 argB N-acetylglutamate kinase	Peripheral inner membrane protein facing the cytoplasm	F1	Yes		Yes		3.43198	0.0136199	5.14954	0.347721	7.36669	0.00377909		1.01347	0.959675	0.73392	0.152384	0.743806	0.305087		27.1	29.8	27.1	28.3	23.6	33.7	29.8	32.9	27.1	33.7	33.7	33.7	31	20.9	27.5	30.6	33.7	33.7	5	6	5	5	4	6	6	6	5	6
EG10065	>EG10065 argC N-acetyl-gamma-glutamyl-phosphate reductase	Cytoplasmic	A		Yes	Yes		2.25804	0.231242	FtsH only	FtsH only	FtsH only	FtsH only		0.854485	0.619757	0.416015	0.0318004	0.355479	0.0321971		6	3	6	9	6	6	12	6	6	5.7	6	3	3	3	3	3	3	3	2	1	2	2	2	2	3	2	2	2
EG10066	>EG10066 argD Acetylornithine aminotransferase	Cytoplasmic	A					1.21612	0.392528	1.04918	0.750146	1.84952	0.89892		0.904213	0.688642	0.745364	0.282783	0.673968	0.0968928		16.3	26.4	26.4	28.1	19.2	24.6	19.2	13.3	24.1	18.5	19.2	31.8	23.9	19.2	29.3	20.4	26.4	24.1	4	6	7	7	5	6	5	3	6	5
EG10068	>EG10068 argG Argininosuccinate synthase	Peripheral inner membrane protein facing the cytoplasm	F1					1.44372	0.549861	0.555703	0.235804	1.66157	0.566074		0.572191	0.305233	0.702638	0.509635	0.402043	0.195958		28	26.6	27.7	29.3	26.6	21	30.9	26.2	34.7	26.4	36.9	29.3	26	33.3	36.7	25.3	30	32.7	9	8	10	8	9	7	10	8	12	8
EG10069;EG10067	>EG10069 argI Ornithine carbamoyltransferase;>EG10067 argF Ornithine carbamoyltransferase	Cytoplasmic	A					0.632036	0.281505	1.37746	0.257583	0.641135	n.def		0.911811	0.740805	n.def	n.def	n.def	n.def		13.8	18.9	16.2	21.9	21.6	27.2	17.4	10.8	21.6	12.9	17.1	16.5	19.2	14.4	21.9	19.2	21.9	21.9	3	5	4	5	5	6	4	2	5	3
EG10070	>EG10070 argR Repressor of Arg regulon	Nucleoid	N					n.def	n.def	1.40622	n.def	n.def	n.def		n.def	n.def	n.def	n.def	n.def	n.def		30.8	0	14.7	30.8	16	16	16	30.8	0	14.7	14.7	30.8	0	14.7	0	16	0	14.7	2	0	1	2	1	1	1	2	0	1
EG10071	>EG10071 argS Arginine--tRNA ligase	Cytoplasmic	A					0.285853	0.101689	0.524521	0.11367	0.583626	0.175563		2.56053	0.214989	0.333669	0.0519815	0.854372	0.750513		17.9	23.4	34	21.3	26.7	23.9	26.3	25.6	27.6	21.8	23.1	27.7	26.7	28.6	24.8	26.3	27.9	28.1	7	10	15	10	11	10	12	11	12	11
EG10072	>EG10072 argT Lys-, Arg-, and Orn-binding protein, periplasmic	Periplasmic	G	Yes				FtsH only	FtsH only	0.462426	0.268865	n.def	n.def		1.43633	0.528792	0.810711	0.680307	1.16445	0.798678		15.4	9.6	9.6	9.6	8.8	8.8	13.8	4.6	9.6	4.2	13.5	4.2	10.8	10.8	6.5	15	4.2	4.2	3	2	2	2	2	2	3	1	2	1
EG10073	>EG10073 aroA 5-enolpyruvyl shikimate-3-phosphate synthase	Cytoplasmic	A					1.68452	0.678704	5.7203	0.161954	0.741081	0.572929		0.936885	0.894255	0.395864	0.526701	0.370879	0.507975		24.4	23.4	15.9	19.9	12.2	13.3	25.5	19	19	10.3	26	20.8	25.5	14.3	19.9	24.4	16.9	21.3	7	7	6	7	4	5	8	7	7	4
EG10074	>EG10074 aroB 3-Dehydroquinate synthase	Cytoplasmic	A	Yes		Yes		FtsH only	FtsH only	n.def	n.def	FtsH only	FtsH only		n.def	n.def	n.def	n.def	0.7103	0.250562		25.7	26.5	21.8	20.4	15.7	25.1	19.6	21.8	21.8	2.2	13.3	19.3	19.3	13.5	13.3	13.3	13.3	13.3	6	5	5	4	4	5	4	5	5	1
EG10075	>EG10075 aroC Chorismate synthase	Cytoplasmic	A					n.def	n.def	n.def	n.def	n.def	n.def		n.def	n.def	n.def	n.def	n.def	n.def		8	0	0	4.2	8	5.3	0	5.3	0	5.3	0	5.3	5.3	5.3	0	0	5.3	0	2	0	0	1	2	1	0	1	0	1
EG10076	>EG10076 aroD 3-Dehydroquinate dehydratase	Cytoplasmic	A					0.448335	n.def	0.550866	n.def	0.464768	n.def		n.def	n.def	n.def	n.def	n.def	n.def		6.3	0	0	10.3	10.3	4	0	10.3	6.3	6.3	0	6.3	6.3	6.3	6.3	17.1	6.3	6.3	1	0	0	2	2	1	0	2	1	1
EG10077	>EG10077 aroE Shikimate 5-dehydrogenase	Cytoplasmic	A					n.def	n.def	n.def	n.def	n.def	n.def		n.def	n.def	n.def	n.def	n.def	n.def		6.2	0	0	0	0	6.2	0	0	0	0	0	0	0	0	0	0	0	0	1	0	0	0	0	1	0	0	0	0
EG10078	>EG10078 aroF 3-deoxy-D-arabino-heptulosonate 7-phosphate (DAHP) synthase	Cytoplasmic	A					0.384171	0.356316	0.755645	0.247547	0.619243	0.832455		1.02853	0.97068	1.21555	0.754301	1.25023	0.824462		32.3	46.1	38.5	43.8	32.3	41.6	45.8	21.9	50	23.9	28.4	30.6	45.8	32.9	45.8	45.8	45.8	41.6	7	10	8	9	7	8	9	5	10	6
EG10079	>EG10079 aroG 3-deoxy-D-arabino-heptulosonate-7-phosphate (DAHP) synthase	Cytoplasmic	A	Yes	Yes	Yes		2.32078	0.0234722	2.59594	0.00556738	4.18291	0.00261529		0.99442	0.986035	0.766993	0.375656	0.762712	0.127344		12.9	18	20.9	24.3	20.9	20.9	24.3	21.4	16.3	9.4	12.9	12.9	20.9	12.9	15.4	12.9	12.9	12.9	3	4	4	5	4	4	5	5	4	2
EG10080	>EG10080 aroH 3-deoxy-D-arabino-heptulosonate-7-phosphate (DAHP) synthase	Cytoplasmic	A					0.66839	n.def	0.505149	0.25326	1.04968	n.def		n.def	n.def	0.755402	0.153786	n.def	n.def		10.3	0	9.5	8	10.1	8	4.3	8	11.8	4.3	9.5	9.5	13.8	3.7	3.7	13.8	13.8	3.7	3	0	3	2	3	2	1	2	3	1
EG10081	>EG10081 aroK Shikimate kinase I	Cytoplasmic	A					1.28511	0.606479	1.73862	0.222861	2.2077	0.223312		1.53253	0.664751	0.768701	0.511688	1.17806	0.850421		27.2	46.8	34.7	48	28.9	14.5	39.3	22	46.8	35.3	39.9	39.9	39.9	38.2	32.4	53.8	23.7	46.2	4	7	5	6	4	2	5	3	6	5
EG10082	>EG10082 aroL Shikimate kinase II	Cytoplasmic	A					3.4854	n.def	n.def	n.def	n.def	n.def		n.def	n.def	n.def	n.def	n.def	n.def		5.7	5.7	5.7	21.8	5.7	13.2	5.7	5.7	5.7	5.7	5.7	13.2	5.7	5.7	13.2	29.3	5.7	5.7	1	1	1	2	1	2	1	1	1	1
EG10088	>EG10088 asd Aspartate semialdehyde dehydrogenase	Peripheral inner membrane protein facing the cytoplasm	F1					0.348652	0.282757	0.750057	0.919266	0.960723	0.869399		0.760899	0.756778	1.667	0.587321	1.26842	0.696593		11.7	22.6	20.4	19.6	14.4	14.4	19.6	7.4	19.6	9	18.8	18.8	14.4	16.1	21.3	9.8	18.8	19.3	2	4	4	4	3	3	4	2	4	2
EG10091	>EG10091 asnA Asparagine synthase A	Cytoplasmic	A		Yes			3.2722	0.0867843	7.91089	0.0455766	1.21166	0.814476		0.60263	0.0348939	0.498478	0.00361051	0.300398	0.000506037		20.3	15.8	20.3	20.3	17	17	17	12.4	17	12.4	7.3	8.5	8.5	12.4	17	7.9	13	13	5	4	5	5	4	4	4	3	4	3
EG10092	>EG10092 asnB Asparagine synthase B [glutamine-hydrolyzing]	Peripheral inner membrane protein facing the cytoplasm	F1			Yes		3.70711	n.def	0.308646	0.0143466	FtsH only	FtsH only		0.771843	0.535452	0.478643	0.260105	0.369437	0.202356		2.9	7.2	10.6	12.5	9	13.9	10.8	7.4	9	12.5	7.4	17	17.5	7.4	18.6	9	10.6	13.5	1	3	4	5	4	5	4	3	3	5
EG10094	>EG10094 asnS Asparagine--tRNA ligase	Peripheral inner membrane protein facing the cytoplasm	F1					5.10161	0.412415	0.579356	0.572773	1.00677	0.466431		0.410779	0.460537	2.2919	0.478347	0.941464	0.720809		22.5	31.1	29.6	33.3	30.3	27.5	32.4	28.3	30.9	23.4	30.9	32.6	29.8	23.6	27.7	25.3	32.4	27.7	10	13	12	13	13	11	13	12	12	9
EG10095	>EG10095 aspA L-Aspartate ammonia-lyase	Peripheral inner membrane protein facing the cytoplasm	F1			Yes		2.90738	0.0788	1.66316	n.def	FtsH only	FtsH only		n.def	n.def	n.def	n.def	0.943973	0.814583		10.3	12.6	4.8	3.8	3.3	10.7	10.3	6.3	5.6	0	7.3	4.8	0	8.2	11.9	2.9	9.2	5	4	4	2	2	2	4	4	2	3	0
EG10096	>EG10096 aspC Aspartate aminotransferase, AspAT	Peripheral inner membrane protein facing the cytoplasm	F1					0.864619	0.944664	3.87224	0.591262	0.415682	0.525462		3.88509	0.304362	0.503011	0.529603	1.95424	0.516314		46.5	37.4	46.2	47.7	33.6	36.1	32.8	34.8	32.3	37.4	27.8	50	48	26.5	39.4	41.4	50.3	46.2	17	15	15	16	13	13	11	13	12	14
EG10097	>EG10097 aspS Aspartate--tRNA ligase	Peripheral inner membrane protein facing the cytoplasm	F1					0.0779849	0.259827	4.03538	0.922501	0.346519	0.158952		0.767093	0.845439	3.86097	0.464309	2.96172	0.484821		30.2	33.2	35.3	28.1	36.6	35.3	33.6	28.6	33.6	31.5	32.2	42.4	40	23.4	46.9	27.8	39.7	39.5	13	16	15	12	18	16	14	13	16	17
EG10098	>EG10098 atpA ATP synthase subunit alpha, membrane-bound, F1 sector	Peripheral inner membrane protein facing the cytoplasm	F1		Yes	Yes		12.5176	0.0504223	4.65957	0.018921	15.5625	0.0035305		0.595971	0.378924	1.03429	0.938932	0.616408	0.00868683		51.5	52	52	53.8	51.9	49.9	54.8	44.2	54.6	41.3	51.9	46.8	49.7	44.1	47	46.6	49.7	51.1	20	21	21	20	19	18	21	16	20	17
EG10100	>EG10100 atpC ATP synthase subunit epsilon, membrane-bound, F1 sector	Peripheral inner membrane protein facing the cytoplasm	F1					3.05836	n.def	0.153117	n.def	n.def	n.def		n.def	n.def	n.def	n.def	n.def	n.def		0	17.3	16.5	17.3	0	33.8	17.3	0	32.4	16.5	33.1	33.1	33.1	16.5	17.3	33.1	0	16.5	0	1	1	2	0	2	2	0	2	1
EG10101	>EG10101 atpD ATP synthase subunit beta, membrane-bound, F1 sector	Peripheral inner membrane protein facing the cytoplasm	F1		Yes	Yes		23.0593	0.0609857	16.9218	0.00873726	24.3937	0.002831		0.86517	0.581089	0.807788	0.338634	0.698873	0.0160727		79.3	87	83	78	78	70.4	78.5	73.7	80	47.6	70.7	68	78.7	65.7	76.3	56.3	71.3	69.8	23	26	24	22	21	20	24	21	23	16
EG10103	>EG10103 atpF ATP synthase subunit b, membrane-bound, F0 sector	Integral Inner Membrane	B	Yes	Yes	Yes		3.39098	0.00103539	9.18055	0.000445163	10.081	0.00233454		0.999727	0.998749	0.717212	0.0184629	0.717016	0.0730717		55.1	55.8	55.8	44.9	45.5	45.5	46.2	44.9	45.5	40.4	55.8	45.5	48.7	25.6	44.9	46.2	34	25.6	10	12	10	8	9	9	10	8	9	6
EG10104	>EG10104 atpG ATP synthase subunit gamma, membrane-bound, F1 sector	Peripheral inner membrane protein facing the cytoplasm	F1	Yes	Yes			5.01201	0.013285	5.96721	0.0179671	3.22193	0.162899		1.02739	0.866465	0.712188	0.0641107	0.731695	0.127065		25.4	25.1	42.2	55.1	31.7	51.2	44.3	28.9	40.8	22.3	26.5	30	29.6	19.9	31	26.5	33.4	42.5	5	7	10	10	7	9	10	6	7	6
EG10105	>EG10105 atpH ATP synthase subunit delta, membrane-bound, F1 sector	Peripheral inner membrane protein facing the cytoplasm	F1	Yes	Yes			2.15303	0.00839159	3.79094	0.0233004	1.15215	0.821813		1.2277	0.315755	0.684971	0.00115151	0.840942	0.299828		42.9	41.8	41.8	46.9	41.8	31.1	46.9	26.6	39.5	18.6	40.7	39.5	33.3	26	33.3	28.2	26	26	6	5	5	6	5	4	6	3	5	3
EG10107	>EG10107 avtA Valine--pyruvate aminotransferase 1	Cytoplasmic	A					0.779827	0.629861	0.597945	0.316937	2.22462	0.2685		0.738001	0.593223	1.33467	0.563104	0.98499	0.962047		8.9	6	6	16.3	12	10.8	9.8	6	8.9	12	5	16.3	14.6	11.3	19.2	9.8	11.8	11.8	3	2	2	4	4	4	3	2	3	4
EG10108	>EG10108 bcp Peroxiredoxin, thioredoxin-dependent thiol peroxidase	Cytoplasmic	A	Yes				2.01723	0.000397188	1.46471	0.334431	0.562368	0.417605		0.82909	0.241641	0.379199	0.167965	0.31439	0.137071		27.6	22.4	27.6	33.3	27.6	41.7	33.3	33.3	33.3	41.7	27.6	33.3	41.7	48.1	41.7	27.6	33.3	27.6	3	2	3	4	3	5	4	4	4	5
EG10109	>EG10109 betA Choline dehydrogenase, oxygen-dependent	Peripheral inner membrane protein facing the cytoplasm	F1					n.def	n.def	n.def	n.def	n.def	n.def		n.def	n.def	n.def	n.def	n.def	n.def		0	0	0	0	0	4.5	0	0	0	0	0	0	0	0	0	0	0	0	0	0	0	0	0	1	0	0	0	0
EG10110	>EG10110 betB Betaine aldehyde dehydrogenase, NAD-dependent	Cytoplasmic	A					1.90747	n.def	1.19678	n.def	1.67234	0.311475		n.def	n.def	n.def	n.def	n.def	n.def		2.9	23.5	11.6	12.9	3.9	13.1	20.4	10.6	12.9	11.8	9	7.8	7.8	10.6	16.5	11.8	7.8	7.8	1	6	2	3	1	4	4	3	3	4
EG10115	>EG10115 bglF PTS system EIIABC enzyme, beta-glucoside phosphotransferase	Integral Inner Membrane	B					n.def	n.def	n.def	n.def	n.def	n.def		n.def	n.def	n.def	n.def	n.def	n.def		0	0	0	0	0	1.6	0	1.6	0	1.6	1.6	1.6	1.6	1.6	0	1.6	0	1.6	0	0	0	0	0	1	0	1	0	1
EG10122	>EG10122 bioH Pimeloyl-ACP methyl ester carboxylesterase	Cytoplasmic	A					n.def	n.def	n.def	n.def	n.def	n.def		n.def	n.def	n.def	n.def	n.def	n.def		4.3	0	4.3	0	0	0	0	0	0	0	0	0	0	5.1	5.1	0	5.1	5.1	1	0	1	0	0	0	0	0	0	0
EG10125	>EG10125 bolA Stationary-phase morphogene, transcriptional repressor	Nucleoid	N					3.39167	n.def	n.def	n.def	n.def	n.def		n.def	n.def	n.def	n.def	n.def	n.def		15.2	0	0	0	0	0	15.2	0	15.2	11.4	0	0	0	0	0	0	0	0	1	0	0	0	0	0	1	0	1	1
EG10129	>EG10129 btuE Glutathione peroxidase	Cytoplasmic	A					0.850536	n.def	1.70318	n.def	1.17447	n.def		n.def	n.def	n.def	n.def	n.def	n.def		19.7	7.7	0	18	18	10.4	6	19.7	18	10.4	13.7	10.4	6	16.4	24	6	0	13.7	2	1	0	2	2	1	1	2	2	1
EG10130	>EG10130 btuR Regulatory gene affecting btuB	Cytoplasmic	A					n.def	n.def	1.985	n.def	3.67517	n.def		n.def	n.def	n.def	n.def	n.def	n.def		13.8	5.6	5.6	8.2	8.2	8.2	8.2	0	8.2	5.6	5.6	3.6	8.2	0	8.2	0	0	8.2	2	1	1	1	1	1	1	0	1	1
EG10134	>EG10134 carA Carbamoyl phosphate synthase, small subunit	Peripheral inner membrane protein facing the cytoplasm	F1		Yes	Yes		2.10821	0.0942213	6.92422	0.00605718	3.78958	0.000807524		0.911688	0.757452	0.671553	0.0989434	0.612247	0.0576082		29.1	50.8	57.3	47.1	53.7	47.1	38.7	38.5	47.4	27	49	56.8	41.9	39.8	57.1	54.2	48.4	56.8	9	13	14	10	11	10	9	9	11	8
EG10135	>EG10135 carB Carbamoyl phosphate synthase, ammonia, large subunit	Peripheral inner membrane protein facing the cytoplasm	F1					18.4351	0.11395	177.564	0.0683801	24.9894	0.38392		0.441883	0.362974	1.0704	0.909351	0.472992	0.003537		26.2	38.5	40.2	40.6	36.5	37.7	37.6	33.9	39.9	30	35.1	37.5	34.7	38.4	40	37	38.6	38.6	22	30	34	33	30	31	32	28	33	29
EG10137	>EG10137 cdd Cytidine deaminase	Cytoplasmic	A					n.def	n.def	n.def	n.def	n.def	n.def		n.def	n.def	n.def	n.def	n.def	n.def		0	0	0	0	0	0	0	4.4	0	0	0	0	0	0	0	0	0	0	0	0	0	0	0	0	0	1	0	0
EG10138	>EG10138 cdh CDP-diglyceride hydrolase	Periplasmic	G					n.def	n.def	n.def	n.def	n.def	n.def		n.def	n.def	n.def	n.def	n.def	n.def		4	0	4	0	0	0	4	4	0	0	3.6	0	7.6	3.6	0	4	3.6	0	1	0	1	0	0	0	1	1	0	0
EG10147	>EG10147 cheB Chemotaxis MCP protein-glutamate methylesterase	Cytoplasmic	A					n.def	n.def	n.def	n.def	n.def	n.def		n.def	n.def	n.def	n.def	n.def	n.def		0	0	0	0	4.3	0	4.3	0	11.7	0	0	0	0	0	0	0	0	0	0	0	0	0	1	0	1	0	2	0
EG10153	>EG10153 moeA Molybdopterin molybdenumtransferase	Cytoplasmic	A	Yes		Yes		FtsH only	FtsH only	1.89171	n.def	9.13821	0.0107031		n.def	n.def	n.def	n.def	1.37827	0.670437		18.2	11.7	15.3	8	11.7	21.7	11.7	19.2	18.2	10.5	18.2	15.3	15.3	10.2	15.3	15.3	15.3	15.3	4	2	3	2	3	4	2	4	4	3
EG10156	>EG10156 clpA ATPase subunit of ClpAP ATP-dependent protease	Cytoplasmic	A	Yes	Yes	Yes		2.31894	0.0237557	3.38839	0.00940214	5.93515	0.00118791		1.01495	0.95518	1.09929	0.68608	1.11573	0.55926		11.9	17.7	15	18.6	20.3	21.8	20.2	17.7	17.5	8.6	20.8	23.6	17.4	14.9	15.6	16	13.5	12.9	6	10	8	10	11	12	11	10	9	5
EG10157	>EG10157 clpB Bichaperone with DnaK for protein disaggregation	Peripheral inner membrane protein facing the cytoplasm	F1	Yes	Yes	Yes		3.9551	0.045699	7.83373	0.00352477	10.3692	3.00647e-05		2.42107	0.0712459	1.01133	0.886227	2.4485	0.0687512		20.3	40.6	31.5	44	34.2	32.7	47.5	31.9	43.8	29.4	33	39.6	31.3	33.8	40.3	29.4	41.7	33.1	13	26	20	26	21	21	28	21	27	21
EG10158	>EG10158 clpP Proteolytic subunit of ClpXP and ClpAP ATP-dependent proteases	Cytoplasmic	A			Yes		2.29891	0.102182	1.33066	0.935804	2.12211	0.00117036		0.25182	0.155233	1.25229	0.664521	0.315353	0.00157952		22.2	22.2	22.2	29	22.2	13	21.7	12.1	21.7	8.7	22.2	22.2	18.4	21.7	34.3	22.2	22.2	21.7	4	4	4	3	4	2	3	2	3	1
EG10159	>EG10159 clpX ATPase subunit of ClpXP protease	Cytoplasmic	A	Yes	Yes	Yes		8.20528	0.00663239	8.56131	0.000353552	6.7274	0.000973276		0.935687	0.758826	0.654866	0.047134	0.612749	0.0573329		46	58	49.8	58.3	51.2	46.7	52.4	48.6	54.5	27.6	27.4	42.7	35.8	31.8	34	38	37.3	37.3	13	17	13	17	15	13	16	14	17	9
EG10160	>EG10160 cpdB 2,3-cyclic nucleotide 2-phosphodiesterase, periplasmic	Periplasmic	G					10.3028	n.def	7.06548	n.def	0.564154	n.def		n.def	n.def	n.def	n.def	n.def	n.def		3.4	4.8	0	0	4.5	4.5	1.9	5.3	6.8	4.5	3.4	8	6.3	5.3	2.8	3.6	6.3	8.2	2	2	0	0	2	2	1	3	3	2
EG10164	>EG10164 crp cAMP-activated global transcription factor	Nucleoid, Peripheral inner membrane protein facing the cytoplasm	N,F1	Yes	Yes	Yes		4.29068	0.0202663	2.19986	0.00132584	2.4721	0.0037107		0.720367	0.111612	0.77924	0.12177	0.561339	0.0171694		64.8	68.6	66.7	68.1	66.7	60.5	69	60.5	60.5	63.3	64.8	55.2	55.2	60.5	60.5	60.5	60.5	60.5	14	14	15	16	15	12	17	13	13	13
EG10165	>EG10165 crr EIIA(Glc), phosphocarrier for glucose PTS transport	Peripheral inner membrane protein facing the cytoplasm	F1			Yes		1.76122	0.146417	8.88103	0.0593334	7.73293	0.0107691		1.10313	0.75248	0.649486	0.120839	0.716466	0.144754		62.1	66.9	60.9	60.9	60.9	60.9	58.6	58.6	60.9	32	43.8	41.4	41.4	59.2	58.6	41.4	76.3	58.6	8	9	7	7	7	7	6	6	7	4
EG10166	>EG10166 cspA Cold-inducible RNA chaperone and anti-terminator	Nucleoid	N					1.07185	0.737865	0.251079	0.00936735	1.00887	0.670736		0.711125	0.442096	0.93374	0.898993	0.664006	0.554529		64.3	71.4	67.1	67.1	45.7	45.7	67.1	45.7	67.1	67.1	85.7	67.1	52.9	67.1	45.7	67.1	67.1	67.1	4	3	3	3	2	2	3	2	3	3
EG10168	>EG10168 lnt Apolipoprotein N-acyltransferase	Integral Inner Membrane	B					n.def	n.def	n.def	n.def	n.def	n.def		n.def	n.def	n.def	n.def	n.def	n.def		0	0	0	2.3	0	0	0	0	3.5	0	0	2.3	0	0	0	0	2.3	0	0	0	0	1	0	0	0	0	1	0
EG10170	>EG10170 cyaA Adenylate cyclase	Cytoplasmic	A					2.21973	n.def	n.def	n.def	n.def	n.def		n.def	n.def	0.856572	0.771668	n.def	n.def		0	2	5.1	2	2	5	2.9	2.9	2	0	2	2	2	0	0	0	0	0	0	1	2	1	1	3	2	2	1	0
EG10173	>EG10173 cydA Cytochrome d (bd-I) terminal oxidase subunit I	Integral Inner Membrane	B			Yes		1.27556	n.def	1.85739	0.105834	3.17705	0.00347691		n.def	n.def	1.12131	0.799559	n.def	n.def		7.9	10.7	18.6	10.7	18.6	12.6	12.6	8	12.6	11.5	9.6	15.9	11.5	9.8	16.7	12.5	18.6	14.2	3	4	6	4	6	5	5	3	5	5
EG10174	>EG10174 cydB Cytochrome d (bd-I) terminal oxidase subunit II	Integral Inner Membrane	B		Yes	Yes		2.26935	n.def	FtsH only	FtsH only	FtsH only	FtsH only		n.def	n.def	0.519677	0.14564	n.def	n.def		2.1	5.8	5.8	5.8	5.8	5.8	5.8	5.8	5.8	3.7	5.8	5.8	3.7	5.8	5.8	3.7	3.7	3.7	1	2	2	2	2	2	2	2	2	1
EG10178	>EG10178 cyoA Cytochrome o oxidase subunit II, lipoprotein	Integral Inner Membrane, Inner Membrane Lipoprotein	B,E					2.0302	0.102936	1.84442	0.209235	3.3484	0.0705104		0.711954	0.36187	1.09833	0.776347	0.781959	0.321785		17.5	26	26	26	26	26	26	17.5	26	17.5	17.5	17.5	26	8.9	17.5	17.5	17.5	26	3	4	4	4	4	4	4	3	4	3
EG10179	>EG10179 cyoB Cytochrome o oxidase subunit I, quinone-binding domain	Integral Inner Membrane	B		Yes			1.60512	n.def	2.87739	0.0474392	5.55597	0.00148817		n.def	n.def	1.68315	0.523639	n.def	n.def		0	4.5	3.2	4.2	2.7	3	1.7	4.2	6.6	4.2	4.2	4.2	5.3	4.2	4.5	5.6	4.2	4.2	0	3	2	2	2	2	1	2	4	3
EG10183	>EG10183 cysA Sulfate/thiosulfate ABC transporter ATPase subunit	Peripheral inner membrane protein facing the cytoplasm	F1					2.05132	0.320688	0.955347	0.755376	0.437119	n.def		0.558409	0.324457	n.def	n.def	n.def	n.def		24.9	29	21.4	20.3	24.1	27.1	24.1	16.2	18.6	6.8	33.7	24.1	20	18.1	20.8	23.8	23.8	31	6	8	6	5	5	6	6	3	4	2
EG10184	>EG10184 cysB Transcriptional activator for the Cys regulon	Nucleoid, Peripheral inner membrane protein facing the cytoplasm	N,F1	Yes		Yes		4.11126	0.0059542	27.6166	0.520392	FtsH only	FtsH only		0.819012	0.221424	0.536859	0.00231334	0.439694	4.13409e-05		15.4	13.6	25.9	32.4	7.7	13.6	25.9	10.2	21.9	5.2	12.3	23.8	15.1	9.3	18.5	13.6	13.6	15.1	5	3	5	7	2	4	6	3	5	2
EG10185	>EG10185 cysC Adenylylsulfate kinase, APS kinase	Cytoplasmic	A					0.162737	n.def	1.26951	n.def	1.13676	n.def		n.def	n.def	n.def	n.def	1.52207	0.535525		7	13.9	7	13.9	7	0	7	7	7	0	7	13.9	7	0	13.9	7	13.9	7	1	2	1	2	1	0	1	1	1	0
EG10186	>EG10186 cysD Sulfate adenylyltransferase subunit 2	Cytoplasmic	A					2.46511	0.168132	0.418048	0.166226	0.63236	0.190181		1.54398	0.515127	0.434445	0.00225099	0.670776	0.383023		20.5	23.2	19.5	18.9	23.2	29.1	25.8	22.2	22.8	26.5	16.6	25.8	18.9	26.5	19.5	29.1	25.5	17.2	5	5	4	4	5	6	6	5	5	6
EG10187	>EG10187 cysE Serine acetyltransferase (SAT)	Cytoplasmic	A					n.def	n.def	n.def	n.def	n.def	n.def		n.def	n.def	n.def	n.def	n.def	n.def		7.7	8.4	8.4	11.7	0	0	8.4	0	0	3.3	8.4	8.4	0	8.4	4.4	0	8.4	3.3	2	1	1	2	0	0	1	0	0	1
EG10188	>EG10188 cysG Siroheme synthase, multifunctional enzyme	Cytoplasmic	A					n.def	n.def	n.def	n.def	n.def	n.def		n.def	n.def	n.def	n.def	n.def	n.def		2.6	0	0	4.2	0	10.1	13.6	0	9.8	0	0	2	4.2	4.2	2	0	4.2	6.1	1	0	0	1	0	3	3	0	2	0
EG10189	>EG10189 cysH Phosphoadenylyl sulfate (PAPS) reductase	Peripheral inner membrane protein facing the cytoplasm	F1					3.03224	n.def	1.23341	0.745934	0.473982	0.576237		n.def	n.def	0.734286	0.638819	n.def	n.def		26.2	22.5	27	21.3	21.7	11.9	13.5	11.9	13.5	13.1	17.2	22.1	18.4	11.9	22.1	18.4	16	12.7	6	6	7	5	5	3	4	3	4	3
EG10190	>EG10190 cysI Sulfite reductase [NADPH] hemoprotein beta-component	Cytoplasmic	A					7.20838	0.385186	3.12506	0.506606	4.10544	0.351518		0.281514	0.269295	1.75904	0.481208	0.495194	0.179166		33.7	46.3	39.8	42.3	28.1	38.6	44.9	24.2	37.9	28.6	36.3	38.4	43	30	33.9	33.3	43	36	15	23	19	19	14	17	22	12	19	15
EG10191	>EG10191 cysJ Sulfite reductase [NADPH] flavoprotein alpha-component	Cytoplasmic	A					0.899198	0.811292	1.08086	0.548787	0.975633	0.788426		1.78609	0.187869	0.443472	0.0155971	0.79208	0.446162		16.2	32.7	37.1	31.6	28	24.5	28.9	17.9	33.6	25.2	30.9	33.6	34.1	33.6	37.1	29.5	41.1	39.6	6	13	13	12	11	9	12	7	13	10
EG10192	>EG10192 cysK Cysteine synthase A, O-acetylserine sulfhydrylase A	Peripheral inner membrane protein facing the cytoplasm	F1					0.417749	0.234159	0.498871	0.244315	0.365324	0.143708		1.18242	0.744873	0.557215	0.123669	0.658861	0.356361		75.9	77.4	76.8	58.8	73.4	55.7	65.6	50.8	77.1	45.8	72.4	74.3	72.8	58.2	78.3	74.9	81.1	68.7	15	16	16	11	14	11	11	9	16	10
EG10193	>EG10193 cysM Cysteine synthase B, O-acetylserine sulfhydrylase B	Cytoplasmic	A					0.842816	n.def	0.808992	0.522007	1.41049	0.500472		n.def	n.def	1.05177	0.904416	n.def	n.def		15.8	25.4	12.2	15.8	15.8	22.1	18.2	12.2	18.2	12.2	22.1	28.1	24.4	22.1	22.1	19.5	15.8	19.5	3	5	2	3	3	4	3	2	3	2
EG10194	>EG10194 cysN Sulfate adenylyltransferase subunit 1	Cytoplasmic	A			Yes		0.952826	0.708245	1.45435	0.624505	2.87987	0.0454197		2.59493	0.168586	0.77396	0.4922	2.00837	0.220738		10.9	25.1	24	32.2	21.1	26.9	23.4	12.6	20.4	20.8	18.7	24	20.8	24.6	28.2	17.1	25.1	24	4	9	9	10	8	10	9	5	8	8
EG10195	>EG10195 cysP Thiosulfate-binding protein, periplasmic	Periplasmic	G					1.80922	0.298916	0.814742	0.292358	1.08311	0.969109		0.893354	0.806015	0.605111	0.130996	0.540579	0.211885		31.4	42.9	43.5	30.2	31.1	28.4	27.8	20.4	33.7	24.3	39.3	47	45.9	20.4	40.2	44.7	40.8	41.4	8	13	12	8	9	7	7	6	9	7
EG10196	>EG10196 cysS Cysteine--tRNA ligase	Cytoplasmic	A					1.17704	0.962202	0.715002	0.38581	1.12265	0.781205		0.78879	0.429881	0.560311	0.0632242	0.441967	0.0288019		9.1	13.4	16.3	18	24.5	12.8	19.1	5.2	23.2	8.2	18.2	30.6	25.4	7.6	26	27.3	18.2	13.9	4	3	5	6	7	4	5	2	7	3
EG10197	>EG10197 cysU Sulfate/thiosulfate ABC transporter membrane permease subunit	Integral Inner Membrane	B					n.def	n.def	n.def	n.def	n.def	n.def		n.def	n.def	n.def	n.def	n.def	n.def		8.7	8.7	0	0	8.7	8.7	8.7	8.7	8.7	0	0	8.7	0	0	0	0	0	0	1	1	0	0	1	1	1	1	1	0
EG10198	>EG10198 cysW Sulfate/thiosulfate ABC transporter membrane permease subunit	Integral Inner Membrane	B					n.def	n.def	n.def	n.def	n.def	n.def		n.def	n.def	n.def	n.def	n.def	n.def		0	0	0	0	5.5	0	5.5	0	0	5.5	5.5	5.5	5.5	5.5	0	0	5.5	0	0	0	0	0	1	0	1	0	0	1
EG10201	>EG10201 dacA D-alanine D-alanine carboxypeptidase PBP5, cell morphology	Peripheral inner membrane protein facing the periplasm	F2	Yes	Yes	Yes		2.31522	0.00976865	2.76202	0.0128948	6.10974	0.00513285		1.05506	0.805163	0.750826	0.050696	0.792164	0.299371		20.6	40.2	30.5	38.2	28.3	15.9	26.8	15.6	20.8	20.8	18.9	29	23.8	8.9	25.8	28	31	29.8	7	10	7	12	8	5	9	5	5	7
EG10202	>EG10202 dacB D-alanine D-alanine carboxypeptidase PBP4	Peripheral inner membrane protein facing the periplasm	F2					n.def	n.def	9.4865	n.def	n.def	n.def		1.21175	0.63065	0.821317	0.498793	0.995231	0.986458		2.9	8.4	8.4	7.5	8.4	2.9	8.4	2.9	8.4	0	2.9	2.9	2.9	2.9	8.4	2.9	2.9	2.9	1	2	2	2	2	1	2	1	2	0
EG10203	>EG10203 dacC D-alanine D-alanine carboxypeptidase PBP6	Peripheral inner membrane protein facing the periplasm	F2					0.759127	n.def	1.36097	n.def	1.50813	n.def		n.def	n.def	0.846522	0.68414	n.def	n.def		5	14	19.5	20	10.5	3.8	12.2	3.8	23.8	6.5	0	11.8	3.5	2.8	10.5	0	11.5	3.5	1	3	5	4	2	1	3	1	5	2
EG10205	>EG10205 dapA Dihydrodipicolinate synthase	Cytoplasmic	A	Yes	Yes	Yes		4.73798	0.00691824	7.72484	0.00205846	8.84023	0.000479092		0.944271	0.813509	0.605693	0.12894	0.571938	0.056353		33.9	30.1	26.4	33.9	33.9	30.1	26.4	26.4	33.9	24.7	26.4	22.6	20.9	24.7	20.9	17.1	17.1	30.1	7	6	5	7	7	6	5	5	7	5
EG10206	>EG10206 dapB Dihydrodipicolinate reductase	Cytoplasmic	A					3.05184	0.110465	0.781678	0.948181	4.44333	0.0691554		0.853733	0.812301	1.85486	0.460225	1.58355	0.459747		9.9	16.8	9.5	24.5	9.5	6.6	6.6	11.7	16.8	9.5	9.5	2.9	9.5	9.5	9.5	6.6	17.2	9.5	2	3	2	4	2	1	1	2	3	2
EG10207	>EG10207 dapD 2,3,4,5-tetrahydropyridine-2-carboxylate N-succinyltransferase	Peripheral inner membrane protein facing the cytoplasm	F1					0.897605	0.482508	0.386678	0.445411	1.76991	0.366941		0.591785	0.596139	1.63453	0.621735	0.967287	0.920453		31	34.7	34.3	48.5	31.8	44.2	40.9	44.2	31.8	33.2	43.8	39.1	31.8	31.8	39.1	29.9	36.1	36.1	8	8	8	10	7	9	8	9	7	8
EG10208	>EG10208 dapE N-succinyl-diaminopimelate desuccinylase, DAP/lysine biosynthesis, contains Zn(2+)/Co(2+)	Cytoplasmic	A					0.596779	n.def	n.def	n.def	3.03399	n.def		n.def	n.def	n.def	n.def	n.def	n.def		0	2.7	2.4	5.3	5.1	2.4	8.3	2.4	2.7	2.7	0	0	3.2	2.4	2.4	0	5.3	5.1	0	1	1	2	2	1	3	1	1	1
EG10209	>EG10209 dapF Diaminopimelate epimerase	Cytoplasmic	A					1.33929	n.def	n.def	n.def	n.def	n.def		n.def	n.def	n.def	n.def	n.def	n.def		5.8	5.8	0	0	5.8	0	10.2	5.8	5.8	0	5.8	4.4	0	0	0	0	5.8	0	1	1	0	0	1	0	2	1	1	0
EG10212	>EG10212 dcp Dipeptidyl carboxypeptidase II	Cytoplasmic	A					0.816324	n.def	0.831536	n.def	0.338298	0.241405		n.def	n.def	n.def	n.def	n.def	n.def		0	14.5	6.6	0	6.5	8.1	10.4	13.8	12.9	2.3	7.3	6.5	10.4	7.2	7.2	3.7	7.2	8.8	0	7	4	0	4	4	6	6	6	1
EG10213	>EG10213 ddlA D-alanine:D-alanine ligase A, ADP-forming	Cytoplasmic	A					1.42777	0.341296	1.58544	0.329214	2.21564	0.412001		2.04835	0.19977	0.747883	0.378855	1.53193	0.30728		15.9	21.7	20.1	13.7	6.6	14.8	19.2	17	12.9	17	22.8	18.4	30.5	7.7	10.7	20.3	22.8	27.5	4	6	5	4	2	3	6	4	4	5
EG10214	>EG10214 ddlB D-alanine:D-alanine ligase B, ADP-forming	Cytoplasmic	A					0.378103	0.120271	0.65219	0.343291	0.484071	0.310461		1.92689	0.21078	0.396973	0.179622	0.764923	0.606837		8.2	8.2	7.8	8.2	7.8	3.9	8.2	3.9	7.8	8.2	7.8	14.7	3.9	12.1	16.3	7.8	7.8	10.5	2	2	2	2	2	1	2	1	2	2
EG10215	>EG10215 deaD ATP-dependent RNA helicase, 50S ribosomal subunit biogenesis	Peripheral inner membrane protein facing the cytoplasm	F1					0.909841	0.720514	0.571688	0.0624866	0.68739	0.238191		0.594459	0.149944	0.60736	0.15479	0.361051	0.0398702		25.9	34.2	31.8	23.8	31	25.4	29.3	28.9	33.9	14.6	29.1	32.9	28.3	18.4	29.1	32.9	28.1	27.2	12	16	14	10	14	11	13	13	15	7
EG10217	>EG10217 accD Acetyl-CoA carboxylase, carboxyltransferase beta subunit	Peripheral inner membrane protein facing the cytoplasm	F1					1.66868	0.0521047	1.66543	0.121742	0.83337	0.578018		0.991279	0.959863	0.549586	0.041126	0.544793	0.0358214		33.9	37.2	27.3	26	40.5	38.5	19.4	38.5	27	22.7	34.2	36.5	34.9	15.1	33.6	44.1	32.6	32.2	10	10	8	6	9	8	5	8	7	7
EG10218	>EG10218 dedD Membrane-anchored periplasmic protein involved in septation	Integral Inner Membrane	B					n.def	n.def	0.445377	n.def	2.36941	n.def		n.def	n.def	n.def	n.def	n.def	n.def		5.5	5.5	5.5	5.5	5.5	5.5	5.5	5.5	0	0	5.5	5.5	5.5	5.5	0	5.5	5.5	5.5	1	1	1	1	1	1	1	1	0	0
EG10219	>EG10219 deoA Thymidine phosphorylase	Peripheral inner membrane protein facing the cytoplasm	F1					n.def	n.def	0.703375	n.def	n.def	n.def		n.def	n.def	n.def	n.def	n.def	n.def		0	0	0	2.5	0	0	0	0	0	0	0	0	2.5	0	2.5	5.9	0	2.5	0	0	0	1	0	0	0	0	0	0
EG10220	>EG10220 deoB Phosphopentomutase	Peripheral inner membrane protein facing the cytoplasm	F1	Yes		Yes		3.98441	0.00306882	1.76369	0.0849711	3.64919	0.00830905		0.624213	0.219679	0.735215	0.364842	0.45893	0.0595395		24.1	34.2	24.3	37.6	26.3	21.6	29	21.4	21.6	14.5	17.9	24.3	21.6	21.4	21.6	17.7	14.7	14.7	9	12	9	13	9	8	10	7	7	5
EG10221	>EG10221 deoC 2-deoxy-D-ribose 5-phosphate aldolase (DERA)	Peripheral inner membrane protein facing the cytoplasm	F1					n.def	n.def	n.def	n.def	n.def	n.def		n.def	n.def	n.def	n.def	n.def	n.def		10.4	4.6	4.6	4.6	4.6	10.4	4.6	5.8	4.6	4.2	4.6	4.6	4.6	0	4.6	0	4.6	4.6	2	1	1	1	1	2	1	1	1	1
EG10222	>EG10222 deoD Purine nucleoside phosphorylase	Peripheral inner membrane protein facing the cytoplasm	F1					0.689037	0.586505	0.630323	0.568452	0.54991	0.285093		1.06034	0.939726	0.749659	0.648377	0.794891	0.625346		17.6	28.9	9.6	19.2	23.4	14.2	32.6	12.6	13.8	12.6	23	13.4	18	12.6	23.4	23.4	17.6	7.9	4	4	1	3	3	2	5	3	2	3
EG10223	>EG10223 deoR Repressor for deo operon, nupG and tsx	Nucleoid	N					n.def	n.def	n.def	n.def	n.def	n.def		n.def	n.def	n.def	n.def	n.def	n.def		4.4	4.4	0	4.4	0	0	0	4.4	0	4.4	0	0	0	4.4	4.4	0	0	0	1	1	0	1	0	0	0	1	0	1
EG10224	>EG10224 dgkA Diacylglycerol kinase	Integral Inner Membrane	B					0.789313	n.def	n.def	n.def	0.4779	n.def		n.def	n.def	n.def	n.def	n.def	n.def		0	9	9	17.2	0	9	9	9	9	17.2	0	9	17.2	0	0	9	17.2	17.2	0	1	1	2	0	1	1	1	1	2
EG10230	>EG10230 dksA RNAP-binding protein modulating ppGpp and iNTP regulation	Nucleoid	N	Yes				2.90536	0.0304066	1.17188	n.def	1.13574	n.def		n.def	n.def	n.def	n.def	n.def	n.def		19.9	19.9	19.9	11.9	19.9	19.9	19.9	19.9	19.9	25.8	19.9	19.9	19.9	19.9	19.9	19.9	19.9	19.9	2	2	2	1	2	2	2	2	2	3
EG10231	>EG10231 dld D-lactate dehydrogenase	Peripheral inner membrane protein facing the cytoplasm	F1	Yes				FtsH only	FtsH only	1.83816	n.def	1.37691	n.def		0.711102	0.381255	1.11142	0.734402	0.790331	0.177081		7.2	5.3	5.3	3.7	2.3	5.3	10.9	5.8	12.3	2.5	2.3	5.1	0	2.3	5.3	2.3	5.3	5.3	3	2	2	1	1	3	5	3	5	1
EG10235	>EG10235 dnaA DNA synthesis initiator and global transcription regulator	Nucleoid, Peripheral inner membrane protein facing the cytoplasm	N,F1			Yes		2.63946	0.16984	0.436613	n.def	FtsH only	FtsH only		0.571744	0.102281	1.06583	0.809135	0.609382	0.0946745		10.3	12.4	9.4	9.2	7.3	2.1	10.9	5.8	12.8	6.9	10.1	9.9	0	3.6	10.3	0	3.2	5.1	3	3	3	2	3	1	3	3	5	3
EG10236	>EG10236 dnaB Replicative DNA helicase	Nucleoid, Peripheral inner membrane protein facing the cytoplasm	N,F1	Yes	Yes	Yes		5.34698	0.00063197	FtsH only	FtsH only	FtsH only	FtsH only		1.00399	0.968949	0.777198	0.0124742	0.7803	0.01652		16.1	19.5	19.5	24.2	18.9	16.6	18.9	26.5	22.1	6.6	6.6	7.2	6.6	6.8	6.6	3.2	6.6	6.6	5	6	6	7	6	5	6	9	7	2
EG10238	>EG10238 dnaE DNA polymerase III, alpha subunit	Nucleoid	N					0.844774	n.def	0.327221	n.def	0.136822	n.def		n.def	n.def	n.def	n.def	n.def	n.def		0	3.3	0	1	0.9	1	2	0.9	1.3	1	2	1	0	1	1	0	2	1	0	3	0	1	1	1	2	1	1	1
EG10240	>EG10240 dnaJ DnaK co-chaperone HSP40	Peripheral inner membrane protein facing the cytoplasm	F1	Yes	Yes	Yes		7.42556	0.00405549	5.3478	0.00135105	3.97066	0.00213004		0.932136	0.702555	0.770101	0.153528	0.717839	0.123698		28.7	29	25.8	24.7	18.9	16	24.7	9.8	27.7	12.5	10.6	18.9	18.9	12.8	25.3	25.5	18.9	16.5	11	11	10	7	6	5	7	4	8	5
EG10241	>EG10241 dnaK Hsp70 molecular chaperone, heat-inducible	Peripheral inner membrane protein facing the cytoplasm	F1	Yes	Yes	Yes		3.41919	0.00145115	3.17955	0.0017392	3.51119	0.000680118		1.29628	0.17512	0.931316	0.205733	1.20725	0.289291		51.6	69.7	63	63.3	61.6	52.8	65	55.5	63.3	56.1	63.9	64.3	63.3	59.2	61.4	58.5	63.9	59.7	30	40	32	38	35	28	38	30	37	29
EG10242	>EG10242 dnaN DNA polymerase III sliding clamp beta subunit	Nucleoid	N					0.676795	0.280716	0.36521	0.111413	0.319658	n.def		0.747924	0.595729	n.def	n.def	n.def	n.def		4.6	4.6	7.1	11.2	7.1	4.6	4.6	2.5	0	7.1	15.6	15.6	15.6	9	9	11.5	11.5	9	1	1	2	3	2	1	1	1	0	2
EG10244	>EG10244 dnaT Primasomal protein i	Nucleoid	N					n.def	n.def	n.def	n.def	n.def	n.def		n.def	n.def	n.def	n.def	n.def	n.def		12.8	0	0	0	0	0	0	0	0	12.8	0	0	0	0	0	0	0	0	1	0	0	0	0	0	0	0	0	1
EG10245	>EG10245 dnaX DNA polymerase III holoenzyme, tau and gamma ATPase subunits	Nucleoid	N	Yes				3.04239	0.00787567	2.70318	0.02374	2.4352	0.0666522		1.067	0.81008	0.565887	0.0464998	0.603804	0.121564		3.9	8.9	7.2	1.2	8.9	6.8	8.9	6.8	7.3	5.9	3.6	2	2.8	6.8	6.8	2.8	3.6	4.2	3	6	5	1	6	5	6	5	5	3
EG10248	>EG10248 dppA Dipeptide-, heme-binding protein, periplasmic	Periplasmic	G					2.06565	0.52749	0.250745	0.0170928	0.0737838	0.00655475		0.254599	0.0610011	1.11677	0.781302	0.28433	0.0974543		5.8	10.1	8.6	7.5	7.1	8.8	5.8	3.4	9.5	8.2	9.3	13.8	4.7	5.8	12.3	7.5	11.2	9.9	2	4	4	3	3	4	2	1	4	3
EG10249	>EG10249 dsdA D-serine dehydratase	Cytoplasmic	A					1.38775	n.def	1.41286	n.def	1.3909	n.def		n.def	n.def	n.def	n.def	n.def	n.def		8.4	11.1	10.2	0	2.9	8.1	0	5.7	11.1	2.9	11.1	8.4	7	4.5	2.9	11.1	8.4	2.9	2	3	2	0	1	2	0	2	3	1
EG10251	>EG10251 dut dUTP pyrophosphatase	Cytoplasmic	A					2.26603	0.0169401	2.37955	0.0205216	1.26077	0.411608		1.11755	0.383807	0.722333	0.108069	0.807242	0.267366		21.9	19.9	7.9	7.9	19.9	19.9	7.9	19.9	19.9	7.9	7.9	7.9	7.9	19.9	7.9	7.9	19.9	7.9	3	2	1	1	2	2	1	2	2	1
EG10255	>EG10255 eco Ecotin, serine protease inhibitor	Periplasmic	G					0.544002	n.def	8.3329	n.def	5.1249	n.def		n.def	n.def	n.def	n.def	n.def	n.def		17.9	25.9	17.9	8.6	17.9	8.6	17.9	9.3	25.9	14.2	8.6	25.9	8.6	0	17.9	17.3	25.9	8	2	3	2	1	2	1	2	1	3	2
EG10256	>EG10256 eda KHG/KDPG aldolase	Peripheral inner membrane protein facing the cytoplasm	F1					0.739244	0.875867	0.49477	0.103297	0.873862	0.920121		0.848309	0.802121	0.788596	0.677282	0.668973	0.596859		12.2	30	26.8	30	30	30	30	12.2	25.4	23	18.3	31.5	30	23	36.2	23	23	36.2	2	4	3	4	4	4	4	2	3	5
EG10258	>EG10258 eno Enolase	Cytoplasmic, Peripheral inner membrane protein facing the cytoplasm, Peripheral outer membrane protein facing the extra-cellular space	A,F1,F4	Yes		Yes		8.74101	0.0025293	5.18611	0.119867	10.1204	0.0243561		1.23553	0.231317	0.842342	0.242349	1.04074	0.677989		61.3	60	59.3	50.9	55.8	43.8	58.1	47.2	52.5	28	57.6	50.5	47	50.2	55.8	49.8	58.8	54.4	20	17	16	13	16	12	16	12	15	8
EG10265	>EG10265 lpxC Lipid A synthesis, UDP-3-O-(R-3-hydroxymyristoyl)-N-acetylglucosamine deacetylase	Cytoplasmic	A					2.12969	n.def	n.def	n.def	n.def	n.def		n.def	n.def	n.def	n.def	n.def	n.def		4.6	5.6	5.6	0	0	2.3	2.3	8.9	0	0	0	12.5	2.3	2.3	5.6	0	0	0	1	1	1	0	0	1	1	2	0	0
EG10270	>EG10270 era Ribosome-associated GTPase essential for growth	Peripheral inner membrane protein facing the cytoplasm	F1					2.28765	n.def	2.9159	n.def	3.75	n.def		0.690924	0.496199	n.def	n.def	n.def	n.def		3	9.3	3	9.6	3	5.6	3	2.7	0	3	3	9.3	3	3	9.6	5.6	9.6	3	1	3	1	2	1	2	1	1	0	1
EG10271	>EG10271 exbB Uptake of enterochelin	Integral Inner Membrane	B					n.def	n.def	1.67921	n.def	n.def	n.def		n.def	n.def	n.def	n.def	n.def	n.def		15.6	6.1	6.1	6.1	6.1	0	6.1	6.1	6.1	6.1	6.1	6.1	6.1	11.9	6.1	6.1	6.1	6.1	3	1	1	1	1	0	1	1	1	1
EG10273	>EG10273 fabA 3R-3-hydroxydecanoyl acyl carrier protein (ACP) dehydratase	Cytoplasmic	A					6.02631	0.288522	1.07546	0.832829	0.611189	0.43013		0.160756	0.0574966	0.835133	0.721389	0.134253	0.0658309		41.3	33.1	33.1	16.9	11.6	25	16.9	19.8	16.9	38.4	32.6	28.5	19.8	33.7	41.3	32.6	33.7	25	6	5	5	3	2	4	3	3	3	6
EG10274	>EG10274 fabB 3-oxoacyl-[acyl-carrier-protein] synthase I	Peripheral inner membrane protein facing the cytoplasm	F1					1.4896	0.408396	3.90889	0.131653	1.13228	0.65091		0.662107	0.416825	0.599381	0.151379	0.396855	0.0427534		22.2	39.2	41.1	45.8	37.9	37.7	48.8	23.9	32.3	27.3	36.5	43.3	40.9	27.1	43.3	43.3	23.6	36.9	8	9	10	10	9	9	10	7	8	8
EG10275	>EG10275 accB Acetyl-CoA carboxylase, biotin carboxyl carrier protein	Cytoplasmic	A		Yes	Yes		1.96246	0.14934	3.39846	0.0136352	2.9967	0.0164227		1.65839	0.276736	0.509813	0.255565	0.84547	0.67687		10.9	32.7	38.5	33.3	32.7	17.9	38.5	17.9	10.9	10.9	23.7	23.7	38.5	38.5	38.5	10.9	38.5	23.7	2	3	4	4	3	2	4	2	2	2
EG10276	>EG10276 accC Acetyl-CoA carboxylase, biotin carboxylase (BC) subunit	Peripheral inner membrane protein facing the cytoplasm	F1		Yes	Yes		2.94338	0.154366	3.29467	0.0219096	3.44142	0.00277479		0.630251	0.468106	0.916118	0.846015	0.577384	0.0387635		27.6	39.4	30.7	24.1	29.2	29	31.6	23.8	33.4	30.7	29	25.2	23.8	23.4	22	27.4	24.7	24.7	12	14	12	9	12	11	11	9	12	12
EG10277	>EG10277 fabH beta-Ketoacyl-ACP synthase III	Cytoplasmic	A			Yes		1.9361	0.0156037	2.50872	0.0570289	4.05109	0.000863144		0.724523	0.60106	0.815529	0.688204	0.59087	0.167567		43.5	40.7	36	43.5	43.5	36.9	53.9	53.3	43.5	29	36.9	43.5	32.8	35.6	54.9	33.1	38.8	31.2	10	9	9	10	10	8	10	10	10	7
EG10278	>EG10278 fadA 3-ketoacyl-CoA thiolase, fatty acid oxidation complex subunit beta	Cytoplasmic	A	Yes				4.38484	0.00534263	3.45427	0.0767829	4.96197	0.120039		1.13777	0.605877	1.15591	0.721647	1.31516	0.366378		15.2	15.2	15.5	20.9	15.2	15.5	23.5	18.1	18.1	12.7	11.9	9	15.5	15.5	15.5	12.7	11.9	15.5	4	4	4	5	4	4	6	5	5	3
EG10280	>EG10280 fadL Fatty acid transport protein, outer membrane	Outer Membrane b-barrel protein	H					n.def	n.def	n.def	n.def	n.def	n.def		n.def	n.def	n.def	n.def	n.def	n.def		3.8	0	0	0	0	0	0	0	0	0	0	0	0	0	0	0	0	0	1	0	0	0	0	0	0	0	0	0
EG10281	>EG10281 fadR Repressor/activator for fatty acid metabolism regulon	Nucleoid	N					n.def	n.def	0.745213	n.def	n.def	n.def		n.def	n.def	n.def	n.def	n.def	n.def		20.5	7.1	12.6	8.4	0	4.2	0	8.8	4.6	0	4.2	0	0	0	7.5	0	0	0	4	1	3	1	0	1	0	2	1	0
EG10282	>EG10282 fbaA Fructose 1,6-bisphosphate aldolase, class II	Peripheral inner membrane protein facing the cytoplasm	F1	Yes		Yes		4.06718	0.049446	1.32945	0.0796322	2.95299	0.00186175		0.967551	0.913175	0.94543	0.818708	0.914752	0.66561		32.9	35.1	34.3	44.3	33.7	42.3	51.3	43.2	34.3	26.5	24.2	31.5	44	37	31.8	27.9	34.3	31.2	11	10	11	14	11	13	14	12	11	7
EG10283	>EG10283 fbp Fructose-1,6-bisphosphatase	Cytoplasmic	A					2.07321	0.33383	0.972889	0.901439	0.955757	0.508437		0.582981	0.110902	0.893281	0.735867	0.520765	0.181896		29.2	20.8	19.9	17.5	19.9	20.8	25.3	10.5	13.9	9	12.7	18.7	17.2	13.9	17.5	9.3	13.9	20.8	7	5	5	4	5	5	6	2	3	2
EG10284	>EG10284 fdhE Redox enzyme maturation protein (REMP) for FdnG/FdoG	Cytoplasmic	A					1.50225	0.378789	1.80655	0.0110932	1.27326	0.673177		1.13175	0.552626	0.692752	0.164294	0.784025	0.284943		9.1	9.4	9.4	8.1	13.3	17.5	16.2	17.2	9.1	4.2	8.1	8.1	13.6	8.1	8.1	12.9	4.2	9.4	2	2	2	2	3	4	4	4	2	1
EG10294	>EG10294 fepB Ferrienterobactin-binding protein, periplasmic	Periplasmic	G					n.def	n.def	n.def	n.def	n.def	n.def		n.def	n.def	n.def	n.def	n.def	n.def		4.1	0	0	0	0	4.1	0	4.1	0	4.1	0	4.1	4.1	4.1	0	0	0	4.1	1	0	0	0	0	1	0	1	0	1
EG10300	>EG10300 ffh Signal Recognition Particle (SRP) protein, with 4.5S RNA	Peripheral inner membrane protein facing the cytoplasm	F1	Yes	Yes	Yes		4.30194	0.0212172	4.16767	0.00366689	4.35913	0.0115869		1.00712	0.972377	0.875408	0.547374	0.881639	0.505388		17	27.6	25.2	30	18.3	17.4	33.6	21	20.1	10.6	11.3	13.7	20.5	11.5	24.5	16.6	20.5	18.3	6	8	7	9	6	6	9	7	7	4
EG10316	>EG10316 lpxD Lipid A synthesis, UDP-3-O-(R-3-hydroxymyristoyl)-glucosamine N-acyltransferase	Cytoplasmic	A					0.239722	n.def	0.519053	n.def	n.def	n.def		n.def	n.def	n.def	n.def	n.def	n.def		2.3	2.3	0	0	2.3	9.1	5.3	9.1	6.2	5.3	3.8	3.8	0	3.8	0	0	3.8	0	1	1	0	0	1	2	1	2	2	1
EG10317	>EG10317 fis Transcriptional activator for rRNA operons, bends DNA	Nucleoid, Peripheral inner membrane protein facing the cytoplasm	N,F1					6.23412	0.00649765	7.66308	0.000289137	9.66569	8.89951e-05		1.00087	0.994391	0.826199	0.080291	0.826915	0.127771		23.5	23.5	23.5	23.5	23.5	23.5	32.7	23.5	23.5	32.7	23.5	23.5	23.5	32.7	32.7	23.5	32.7	23.5	1	1	1	1	1	1	2	1	1	2
EG10318	>EG10318 fldA Flavodoxin I	Cytoplasmic	A					1.86328	0.990083	0.550365	n.def	0.653036	n.def		n.def	n.def	n.def	n.def	n.def	n.def		18.8	18.8	43.8	35.8	33	5.7	22.2	10.8	22.2	26.1	33	33	33	24.4	33	33	33	28.4	3	2	4	4	4	1	3	1	3	3
EG10326	>EG10326 folA Dihydrofolate reductase	Cytoplasmic	A					n.def	n.def	1.22591	n.def	0.648391	n.def		n.def	n.def	n.def	n.def	n.def	n.def		6.9	0	0	13.2	8.2	15.1	5	20.1	20.1	8.2	11.3	5	8.2	15.1	13.2	0	6.9	5	1	0	0	2	1	2	1	3	3	1
EG10327	>EG10327 folC Dihydrofolate:folylpolyglutamate synthase	Cytoplasmic	A			Yes		2.03413	0.111016	1.3464	0.288731	2.8454	0.000200588		0.766559	0.648491	1.18009	0.760043	0.904606	0.586102		12.8	17.5	15.6	12.8	15.6	15.6	15.6	20.4	19.2	17.3	13	12.8	12.6	13	12.8	15.6	12.8	12.8	4	6	5	4	5	5	5	7	6	6
EG10328	>EG10328 folD Methenyltetrahydrofolate dehydrogenase/cyclohydrolase	Cytoplasmic	A					1.20786	0.4337	1.57628	0.190419	1.89919	0.735069		0.822675	0.711205	1.1327	0.799559	0.931847	0.666723		18.8	18.8	18.8	21.9	18.1	18.8	25.3	14.6	22.2	10.4	6.9	29.5	29.5	14.6	22.2	22.2	29.5	22.2	4	4	4	4	4	4	5	3	5	3
EG10330	>EG10330 frdA Fumarate reductase flavoprotein subunit	Peripheral inner membrane protein facing the cytoplasm	F1					n.def	n.def	n.def	n.def	n.def	n.def		n.def	n.def	n.def	n.def	n.def	n.def		0	0	0	0	0	0	0	0	0	0	0	0	1.2	0	0	0	0	2.2	0	0	0	0	0	0	0	0	0	0
EG10331	>EG10331 frdB Fumarate reductase iron-sulfur protein subunit	Peripheral inner membrane protein facing the cytoplasm	F1	Yes	Yes			FtsH only	FtsH only	FtsH only	FtsH only	1.53295	n.def		0.616129	0.115747	0.652346	0.23133	0.401929	0.0595266		15.6	16	16	29.1	16	16	16	11.1	4.5	4.5	4.9	6.6	0	11.1	0	11.5	4.5	0	3	3	3	4	3	3	3	2	1	1
EG10334	>EG10334 fre NAD(P)H-flavin reductase	Cytoplasmic	A					0.2982	0.0540262	0.59547	0.318279	0.112828	0.0409743		0.872018	0.657797	0.369297	0.0871955	0.322033	0.0784605		9.4	9.4	9.4	14.6	14.6	14.6	14.6	14.6	14.6	10.7	9.9	15	9	14.6	15	15	14.6	15	2	2	2	2	3	3	3	3	3	2
EG10335	>EG10335 frr Ribosome recycling factor (RRF)	Peripheral inner membrane protein facing the cytoplasm	F1					0.874061	0.392861	0.281444	0.0671491	0.144241	0.0301025		0.285265	0.0940959	0.6086	0.432648	0.173612	0.110006		49.2	35.7	35.7	30.3	35.7	30.3	35.7	35.7	35.7	30.3	41.6	36.2	41.6	35.7	41.6	41.6	41.6	36.2	7	5	6	4	5	5	5	6	5	6
EG10336	>EG10336 fruA Fructose permease, PTS Enzyme IIBC component	Integral Inner Membrane	B					1.85869	n.def	4.69619	n.def	3.62687	n.def		n.def	n.def	n.def	n.def	n.def	n.def		2.3	0	2.3	2.3	2.3	2.3	2.3	2.3	2.3	2.3	2.3	2.3	2.3	2.3	2.3	2.3	2.3	0	1	0	1	1	1	1	1	1	1	1
EG10337	>EG10337 fruK Fructose-1-phosphate kinase	Cytoplasmic	A					n.def	n.def	n.def	n.def	n.def	n.def		n.def	n.def	n.def	n.def	n.def	n.def		0	5.8	0	0	0	0	0	0	0	0	0	0	0	0	0	0	0	0	0	1	0	0	0	0	0	0	0	0
EG10338	>EG10338 cra Catabolite repressor-activator	Nucleoid	N	Yes				FtsH only	FtsH only	0.563892	0.43853	1.91494	n.def		0.270775	0.111713	1.66135	0.336686	0.449854	0.0182524		10.8	8.7	8.7	16.8	12.6	8.7	8.7	4.8	8.7	3.9	8.7	3.9	8.7	0	8.7	4.8	4.8	3.9	3	2	2	4	3	2	2	1	2	1
EG10339	>EG10339 ftsA Cell division and septation protein, specific role unknown	Peripheral inner membrane protein facing the cytoplasm	F1	Yes	Yes	Yes		4.727	0.0136224	2.28337	0.0459692	4.55772	0.000367692		0.634134	0.427761	1.44117	0.475481	0.913893	0.734678		22.1	20.2	33.1	17.1	32.9	22.1	30.7	15	23.8	10.7	9.3	9.3	19.3	10.7	26.4	22.9	22.1	25.2	6	5	8	4	8	6	7	4	6	4
EG10340	>EG10340 ftsE ATP-binding protein associated with the inner membrane via FtsX	Peripheral inner membrane protein facing the cytoplasm	F1	Yes		Yes		5.45735	0.00080047	1.56162	0.281145	4.71791	0.0329622		0.338654	0.329321	1.91739	0.471859	0.649333	0.266305		31.5	18.9	31.5	5.9	31.1	27.9	38.7	15.3	35.6	5.9	27.9	18.5	27.9	5.9	18.5	15.8	27.9	18.5	5	4	5	1	4	3	5	2	4	1
EG10341	>EG10341 ftsI Transpetidase, PBP3	Integral Inner Membrane	B					n.def	n.def	n.def	n.def	n.def	n.def		n.def	n.def	n.def	n.def	n.def	n.def		2.7	0	0	0	0	0	0	0	0	0	2.7	0	0	0	0	0	0	0	1	0	0	0	0	0	0	0	0	0
EG10345	>EG10345 ftsX Integral membrane protein invoved in cell division	Integral Inner Membrane	B					n.def	n.def	n.def	n.def	n.def	n.def		n.def	n.def	n.def	n.def	n.def	n.def		6.8	0	0	0	0	0	0	0	0	0	0	0	3.1	0	3.1	0	4.3	7.4	2	0	0	0	0	0	0	0	0	0
EG10346	>EG10346 ftsY Signal recognition particle (SRP) receptor, GTPase	Peripheral inner membrane protein facing the cytoplasm	F1					0.456778	n.def	1.13568	0.412183	0.132167	0.00995551		n.def	n.def	0.564634	0.00686706	n.def	n.def		0	22.3	31.4	27.8	16.3	16.1	24.1	11.9	25.8	4	12.9	18.3	12.7	7.2	28.8	31.6	16.1	26.8	0	6	7	6	4	4	7	3	6	2
EG10347	>EG10347 ftsZ Septal ring GTPase required for cell division and growth	Peripheral inner membrane protein facing the cytoplasm	F1	Yes	Yes	Yes		11.157	0.00121094	13.8803	9.45263e-07	19.7341	7.53717e-06		1.31071	0.0675726	0.851839	0.288071	1.11652	0.30658		55.6	71.8	71	70.8	71.8	71.8	76.2	81.2	87.7	44.1	44.6	55.6	52.5	45.4	58	66.6	67.4	58.7	15	19	18	18	18	18	19	19	22	12
EG10353	>EG10353 fucR Positive regulatory protein for fuc regulon	Nucleoid	N	Yes	Yes			FtsH only	FtsH only	FtsH only	FtsH only	1.12551	n.def		0.497952	0.621718	n.def	n.def	n.def	n.def		9.1	18.9	18.9	9.1	9.1	9.1	18.9	9.1	18.9	4.1	0	0	4.1	4.1	4.9	4.9	0	9.1	2	3	3	2	2	2	3	2	3	1
EG10355	>EG10355 fucU L-Fucose mutarotase	Cytoplasmic	A					0.828958	n.def	0.768906	n.def	0.882391	n.def		n.def	n.def	n.def	n.def	n.def	n.def		8.6	8.6	8.6	0	8.6	8.6	8.6	8.6	0	0	8.6	8.6	0	8.6	8.6	0	8.6	0	1	1	1	0	1	1	1	1	0	0
EG10356	>EG10356 fumA Fumarase A, aerobic	Peripheral inner membrane protein facing the cytoplasm	F1	Yes		Yes		2.51201	0.0425142	1.4482	0.158727	2.94332	0.0117178		0.868638	0.576847	0.88357	0.544708	0.767502	0.157504		18.2	28.8	28.8	26.3	33	31.2	35.6	23.9	27.6	32.7	19	34.5	31.4	39.1	26.3	33	33.6	25	6	10	9	6	8	7	9	6	6	7
EG10358	>EG10358 fumC Fumarase C, aerobic	Peripheral inner membrane protein facing the cytoplasm	F1					0.819731	n.def	1.04098	n.def	1.22399	n.def		n.def	n.def	n.def	n.def	n.def	n.def		2.6	2.6	2.6	2.6	0	0	2.6	2.6	0	5.1	5.4	5.4	2.6	0	5.4	5.4	2.6	2.6	1	1	1	1	0	0	1	1	0	2
EG10359	>EG10359 fur Ferric iron uptake global transcriptional repressor	Nucleoid	N					0.829388	0.444643	1.14152	0.532815	1.3123	0.398072		1.13431	0.681183	0.555695	0.294578	0.630333	0.351319		47.3	47.3	41.2	46.6	47.3	46.6	46.6	40.5	40.5	46.6	41.2	46.6	40.5	46.6	40.5	40.5	46.6	40.5	6	7	6	5	6	5	5	4	4	5
EG10360	>EG10360 fusA Elongation Factor EF-G	Peripheral inner membrane protein facing the cytoplasm	F1	Yes	Yes	Yes		5.17666	0.0145962	4.71933	0.0216871	10.0842	0.00039795		0.766668	0.561848	0.920137	0.807337	0.70544	0.141768		51.6	60.8	54.7	60.8	54.7	52.7	57.1	49	55.8	43.3	62.8	57.1	55.3	60.8	57.1	54.7	60.8	53.4	28	29	27	28	26	26	27	24	27	24
EG10361	>EG10361 gabT 4-aminobutyrate aminotransferase	Peripheral inner membrane protein facing the cytoplasm	F1					n.def	n.def	n.def	n.def	n.def	n.def		n.def	n.def	n.def	n.def	n.def	n.def		3.1	0	0	0	0	0	0	0	0	0	6.3	0	0	0	0	0	0	0	1	0	0	0	0	0	0	0	0	0
EG10367	>EG10367 gapA Glyceraldehyde 3-P dehydrogenase A	Peripheral inner membrane protein facing the cytoplasm	F1	Yes		Yes		3.26882	0.0325893	2.04501	0.101394	3.67724	0.000425384		0.657241	0.54224	1.30711	0.673531	0.859086	0.122618		45.6	61.3	47.7	54.1	45.9	45.9	47.1	55.3	50.5	39.3	47.4	48.9	46.8	55.6	57.7	47.4	59.5	43.5	13	17	14	15	12	12	14	14	12	11
EG10368	>EG10368 epd Erythrose-4-P dehydrogenase	Cytoplasmic	A					n.def	n.def	0.660112	n.def	3.44823	n.def		n.def	n.def	n.def	n.def	n.def	n.def		2.9	10.3	2.4	8	0	0	10.6	0	3.2	0	0	0	0	3.2	5.9	3.2	3.2	3.2	1	2	1	2	0	0	2	0	1	0
EG10369	>EG10369 gcd Glucose dehydrogenase (pyrroloquinoline-quinone) quinoprotein	Integral Inner Membrane	B			Yes		1.67266	n.def	3.5884	n.def	FtsH only	FtsH only		n.def	n.def	n.def	n.def	n.def	n.def		0	8.8	6.8	3.4	3.1	6.3	7.4	4.9	5	6.3	7.4	9.8	3.4	6.3	9.7	5	7.5	7.3	0	4	4	2	2	4	5	3	3	4
EG10370	>EG10370 ispG 1-hydroxy-2-methyl-2-(E)-butenyl 4-diphosphate synthase	Peripheral inner membrane protein facing the cytoplasm	F1					0.787378	0.234961	0.279905	0.147712	0.300091	0.115956		0.884187	0.714953	0.849887	0.609067	0.751459	0.299172		33.6	37.9	32	27.4	25.8	32.5	28.5	24.2	37.4	21.2	15.3	18.3	21.8	9.7	21.5	21.2	15.3	21.5	9	11	9	8	8	10	9	8	11	6
EG10371	>EG10371 gcvH Glycine cleavage, carrier of aminomethyl group	Cytoplasmic	A					n.def	n.def	n.def	n.def	n.def	n.def		n.def	n.def	n.def	n.def	n.def	n.def		0	17.8	0	0	0	0	0	0	0	6.2	0	0	0	0	0	0	0	0	0	1	0	0	0	0	0	0	0	1
EG10372	>EG10372 gdhA Glutamate dehydrogenase, hexameric	Cytoplasmic	A					n.def	n.def	n.def	n.def	n.def	n.def		n.def	n.def	n.def	n.def	n.def	n.def		7.8	6.5	7.8	3.6	3.6	7.8	3.6	7.8	7.8	7.8	7.8	7.8	7.8	7.8	7.8	12.3	3.6	7.8	2	2	2	1	1	2	1	2	2	2
EG10375	>EG10375 mnmG 5-methylaminomethyl-2-thiouridine modification at tRNA U34	Peripheral inner membrane protein facing the cytoplasm	F1					1.24715	n.def	0.791519	0.230002	0.977422	0.835506		n.def	n.def	0.482308	0.0138767	n.def	n.def		2.1	17.8	17.8	5.7	11.4	9.7	13.8	9.2	16.1	5.2	8.1	14.3	11.6	11.4	11.9	7.2	11.3	13.8	1	7	6	2	4	3	5	4	6	3
EG10376	>EG10376 rsmG 16S rRNA m(7)G527 methyltransferase, SAM-dependent	Cytoplasmic	A			Yes		3.39194	0.208553	3.0299	0.14959	4.32563	0.0121884		0.681621	0.312162	0.664865	0.0565791	0.453186	0.0416661		12.6	20.3	7.7	16.4	4.8	23.2	12.6	12.6	12.6	17.9	18.4	12.6	4.8	7.7	7.7	12.6	12.6	7.7	2	3	1	3	1	3	2	2	2	3
EG10377	>EG10377 glgA Glycogen synthase	Peripheral inner membrane protein facing the cytoplasm	F1					2.90867	n.def	n.def	n.def	n.def	n.def		n.def	n.def	n.def	n.def	n.def	n.def		0	3.1	0	0	0	0	0	0	0	6.1	2.7	2.1	17.8	15.1	24.9	26	16.6	17.8	0	1	0	0	0	0	0	0	0	3
EG10378	>EG10378 glgB 1,4-alpha-glucan branching enzyme	Cytoplasmic	A					n.def	n.def	n.def	n.def	n.def	n.def		n.def	n.def	n.def	n.def	n.def	n.def		0	0	0	0	0	0	0	0	0	2.5	0	0	4.8	5.9	5.8	8.9	8	5.8	0	0	0	0	0	0	0	0	0	1
EG10380	>EG10380 glgP Glycogen phosphorylase	Cytoplasmic	A					n.def	n.def	n.def	n.def	n.def	n.def		n.def	n.def	n.def	n.def	n.def	n.def		1.3	1.3	0	0	0	0	0	0	0	0	0	0	0	1.3	1.3	0	0	0	1	1	0	0	0	0	0	0	0	0
EG10382	>EG10382 glmS Glucosamine-6-phosphate synthase	Peripheral inner membrane protein facing the cytoplasm	F1	Yes		Yes		3.42235	0.0152914	2.27376	0.0569175	3.35007	0.000196597		0.561112	0.416921	1.3474	0.619685	0.756043	0.108375		64.2	64.7	64.4	60.3	62.4	57.8	60.8	62.1	61.6	45.6	53.2	55.2	54.2	58	60.4	51.9	58.6	53.2	43	43	37	32	36	31	35	30	33	24
EG10383	>EG10383 glnA Glutamine synthase	Cytoplasmic	A	Yes		Yes		2.55639	0.0336515	1.41869	0.303185	2.5197	0.0121117		0.900075	0.821319	0.865134	0.720755	0.778685	0.123399		34.1	49.3	38.6	43.7	41.8	35.4	48.6	25.4	41.8	31.8	31.6	38.6	38	39.9	38.6	37.7	46.3	45	11	13	13	14	13	11	15	9	13	11
EG10384	>EG10384 glnB PII regulatory protein for glutamine synthase	Cytoplasmic	A					0.870212	0.562466	0.970559	0.803154	0.393997	0.00938361		0.929143	0.801664	0.592205	0.0707499	0.550243	0.038331		40.2	30.4	40.2	30.4	40.2	30.4	40.2	40.2	40.2	40.2	40.2	33	40.2	40.2	40.2	40.2	40.2	40.2	4	3	4	3	4	3	4	4	4	4
EG10385	>EG10385 glnG Nitrogen regulator I	Nucleoid	N					n.def	n.def	n.def	n.def	n.def	n.def		n.def	n.def	n.def	n.def	n.def	n.def		0	2.6	0	0	2.6	0	0	0	0	0	0	0	0	2.6	0	2.6	0	0	0	1	0	0	1	0	0	0	0	0
EG10386	>EG10386 glnH Glutamine-binding protein, periplasmic	Periplasmic	G					0.269677	0.183815	1.85136	0.444695	0.502015	0.179303		0.987634	0.981494	0.35429	0.12434	0.349909	0.125648		25.8	19.8	19.8	33.9	27.8	19.8	19.8	13.3	19.8	6.9	27.4	21.4	21.4	19	6.5	9.7	27.4	13.3	4	3	3	5	4	3	3	2	3	1
EG10388	>EG10388 glnP Glutamine transport system permease protein GlnP	Integral Inner Membrane	B					n.def	n.def	n.def	n.def	n.def	n.def		n.def	n.def	n.def	n.def	n.def	n.def		0	0	0	0	4.1	4.1	8.7	0	8.7	4.6	0	0	0	4.6	4.6	0	4.6	4.6	0	0	0	0	1	1	2	0	2	1
EG10389	>EG10389 glnQ Glutamine high-affinity transport system, ATP-binding protein	Peripheral inner membrane protein facing the cytoplasm	F1					1.71433	n.def	1.40643	0.454354	1.14459	n.def		n.def	n.def	n.def	n.def	n.def	n.def		5	10	0	11.2	8.8	11.2	6.2	15.4	3.8	5	6.2	10	6.2	10	15	15	6.2	6.2	1	2	0	2	2	2	1	3	1	1
EG10390	>EG10390 glnS Glutamine--tRNA ligase	Cytoplasmic	A					1.21273	0.389276	0.894153	0.656571	0.499125	0.26055		0.838746	0.128767	0.463509	0.298066	0.388766	0.243694		16.4	17.1	18.1	7.6	10.5	8.3	20.6	14.4	14.3	9	11.4	15.2	14.1	11.2	11.2	18.4	17.1	13.5	7	8	8	4	7	5	9	8	9	5
EG10391	>EG10391 glpA Anaerobic glycerol-3-phosphate dehydrogenase subunit A	Peripheral inner membrane protein facing the cytoplasm	F1					n.def	n.def	n.def	n.def	32.5887	n.def		n.def	n.def	n.def	n.def	n.def	n.def		2.8	0	0	0	0	0	2.8	0	5.2	0	0	0	3.7	2.8	0	6.5	0	0	1	0	0	0	0	0	1	0	2	0
EG10394	>EG10394 glpD sn-Glycerol-3-phosphate dehydrogenase (aerobic)	Peripheral inner membrane protein facing the cytoplasm	F1			Yes		0.403389	n.def	n.def	n.def	FtsH only	FtsH only		n.def	n.def	n.def	n.def	n.def	n.def		2	0	2.8	0	7	4.2	17	8.2	25.3	2	2	2	4	2	2	2	2	2	1	0	1	0	3	2	7	4	10	1
EG10398	>EG10398 glpK Glycerol kinase	Peripheral inner membrane protein facing the cytoplasm	F1	Yes	Yes	Yes		FtsH only	FtsH only	2.4031	0.0215472	FtsH only	FtsH only		0.698236	0.500332	1.93972	0.271999	1.35438	0.412859		21.7	21.3	16.5	17.5	18.5	19.3	23.9	18.7	29.9	3	3	3	9	9	7.8	18.1	2.6	3	9	9	6	6	8	7	10	7	13	1
EG10399	>EG10399 glpQ Glycerophosphodiester phosphodiesterase, periplasmic	Periplasmic	G					n.def	n.def	1.90352	n.def	1.48282	0.507717		n.def	n.def	n.def	n.def	n.def	n.def		2.5	0	0	8.4	0	2	4.5	2	8.4	0	0	2	6.4	7.5	8.9	2	5.9	2	1	0	0	3	0	1	2	1	3	0
EG10400	>EG10400 glpR Repressor of glp regulon, induced by glycerol phophate	Nucleoid	N		Yes	Yes		3.54636	0.0625477	3.39032	0.0157219	5.0777	0.00491003		1.02066	0.96302	1.01693	0.969286	1.03793	0.853369		40.9	30.6	44.4	25.4	34.1	44.4	48	44.4	44.4	18.7	35.7	12.7	25.4	29	25.4	27.4	19.4	14.7	6	5	7	5	6	7	8	7	7	4
EG10402	>EG10402 gltA Citrate synthase	Peripheral inner membrane protein facing the cytoplasm	F1	Yes		Yes		2.8409	0.0091622	3.10038	0.126323	4.64561	0.000764063		0.834151	0.637349	1.11175	0.728378	0.927367	0.758081		24.8	29.7	25.5	27.4	22	25.3	22.7	18.7	27.2	12.4	14.3	20.4	20.1	13.8	22	22	21.3	13.8	10	11	9	9	8	9	8	6	9	5
EG10403	>EG10403 gltB Glutamate synthase, large subunit	Peripheral inner membrane protein facing the cytoplasm	F1					7.41974	0.169403	9.4587	0.555487	3.93113	0.635238		0.708485	0.361272	0.659934	0.192107	0.467554	0.0852477		6.3	25.6	29.7	26.2	25.2	22.7	24	23.8	21.9	26.9	27.7	32.9	32.4	27.3	27.3	30.6	30.7	25.8	6	29	32	28	27	23	25	24	22	30
EG10404	>EG10404 gltD Glutamate synthase, small subunit	Cytoplasmic	A					1.28953	0.197777	2.47853	0.379329	0.295487	0.131889		0.640639	0.564682	0.54886	0.380644	0.351621	0.127939		12.9	15.5	9.7	9.7	9.5	12.3	11.4	8.7	9.3	16.7	15.5	9.7	6.4	12.9	12.9	8.9	15.5	12.9	4	5	3	3	3	4	4	3	3	6
EG10405	>EG10405 gltP Proton-glutamate-aspartate transport protein	Integral Inner Membrane	B					n.def	n.def	n.def	n.def	n.def	n.def		n.def	n.def	n.def	n.def	n.def	n.def		0	0	0	5.7	0	3.9	3.9	0	3.9	0	0	0	3.9	0	0	0	3.9	1.8	0	0	0	2	0	1	1	0	1	0
EG10406	>EG10406 gltS Glutamate permease	Integral Inner Membrane	B					n.def	n.def	n.def	n.def	n.def	n.def		n.def	n.def	n.def	n.def	n.def	n.def		0	2.2	2.2	2.2	2.2	2.5	4.7	2.2	4.7	2.2	0	2.2	0	0	2.2	0	2.2	0	0	1	1	1	1	1	2	1	2	1
EG10407	>EG10407 gltX Glutamate--tRNA ligase	Cytoplasmic	A		Yes	Yes		1.49446	0.36558	3.947	0.00115359	3.3606	0.0100069		1.22721	0.051145	0.663739	0.0764337	0.814545	0.276977		17.4	29.5	28.9	30.8	25.9	23.6	31.4	23.6	26.8	21.7	24.6	30.8	23.6	24	27.4	23.6	27.6	25.7	6	12	10	10	9	8	11	8	9	7
EG10408	>EG10408 glyA Serine hydroxymethyltransferase	Peripheral inner membrane protein facing the cytoplasm	F1					0.580103	0.60981	1.40018	0.679256	1.53797	0.915412		6.47553	0.431002	0.81235	0.648839	5.2604	0.450321		41.7	36.2	36.2	32.1	36.2	23	35	22.5	31.2	30.9	36.2	36.2	35	45.1	36.2	34.1	36.2	36.2	15	11	11	9	11	6	10	7	10	11
EG10409	>EG10409 glyQ Glycine--tRNA ligase, alpha-subunit	Peripheral inner membrane protein facing the cytoplasm	F1					0.632719	0.341199	2.66807	0.338842	2.82093	0.0908998		1.01264	0.982248	1.05963	0.924952	1.07302	0.797661		10.2	21.5	17.8	13.9	17.8	10.2	13.9	13.9	13.9	7.3	17.8	21.5	21.5	17.8	17.8	13.9	17.8	17.8	2	4	3	3	3	2	3	3	3	2
EG10410	>EG10410 glyS Glycine--tRNA ligase, beta-subunit	Peripheral inner membrane protein facing the cytoplasm	F1		Yes	Yes		4.49337	0.0949782	6.49569	0.000230352	3.13916	0.00188796		1.17418	0.518776	0.743152	0.0443891	0.872591	0.530087		20.6	47.8	42.7	43.1	41.7	25.1	42.7	28	41.9	32.7	26.7	37	33.2	25	39.2	36.9	47.5	36.9	10	23	21	21	19	12	21	14	21	20
EG10411	>EG10411 gnd 6-phosphogluconate dehydrogenase, decarboxylating	Peripheral inner membrane protein facing the cytoplasm	F1					1.61548	0.246607	0.851589	0.677664	0.32789	0.0630542		0.560632	0.0597462	0.666018	0.302455	0.373391	0.0831753		28	41.2	42.1	42.7	36.8	34	33.5	28.8	29.7	37.8	31.4	43.6	31.4	30.1	38.7	29.9	27.8	41	12	18	15	14	13	12	12	9	11	15
EG10412	>EG10412 gor Glutathione reductase, NADP+, FAD-binding	Cytoplasmic	A					0.380148	n.def	3.60278	0.549843	0.269267	n.def		n.def	n.def	0.23182	0.164884	n.def	n.def		8.4	8.4	12.4	19.1	15.1	12.4	15.1	8.9	8.4	7.3	3.3	17.1	12.4	5.8	9.8	3.3	15.1	12.4	2	2	3	4	3	3	3	3	2	2
EG10413	>EG10413 gpp Guanosine pentaphosphatase and exopolyphosphatase	Cytoplasmic	A	Yes		Yes		2.67157	0.0317088	2.19554	0.0547557	3.46097	0.00243831		0.738643	0.596662	1.35016	0.589576	0.997285	0.98906		24.9	34.6	27.9	30.2	32.4	28.1	32.6	22.7	32.8	28.3	21.1	20.4	22.5	20.9	22.9	21.9	28.5	20.4	11	14	10	11	12	10	13	9	14	12
EG10414	>EG10414 gpt Guanine-xanthine phosphoribosyltransferase phosphotransferase	Peripheral inner membrane protein facing the cytoplasm	F1					1.80264	0.485405	1.00809	n.def	0.759204	0.812127		0.746109	0.516063	0.692771	0.516367	0.516883	0.379508		23.7	23.7	24.3	24.3	23.7	16.4	24.3	23.7	24.3	15.8	13.2	29.6	40.1	23.7	29.6	29.6	30.3	30.3	2	2	3	3	2	1	3	2	3	3
EG10415	>EG10415 greA Transcript cleavage factor	Cytoplasmic	A					0.489851	0.165067	0.717144	0.407497	0.239963	0.0496688		1.08156	0.691936	0.888745	0.733736	0.961229	0.90563		43	52.5	41.1	60.8	47.5	23.4	66.5	37.3	44.9	44.3	47.5	72.2	44.9	58.9	60.1	45.6	60.8	53.2	6	7	5	9	7	3	9	5	7	6
EG10416	>EG10416 grpE Nucleotide exchange factor for the DnaKJ chaperone	Peripheral inner membrane protein facing the cytoplasm	F1					1.61323	0.276992	1.70229	0.112231	2.25673	0.182101		1.81067	0.480419	0.68003	0.152648	1.23131	0.755521		11.7	36	36	36	32.5	23.9	32.5	32.5	32.5	28.9	23.9	32.5	23.9	36	36	23.9	36	32.5	2	4	4	4	3	2	3	3	3	3
EG10418	>EG10418 gshA Glutamate--cysteine ligase	Cytoplasmic	A					0.734555	0.525357	1.6876	n.def	1.41075	0.457564		n.def	n.def	n.def	n.def	1.04361	0.907199		8.3	18.3	16.6	17.6	10.8	12.4	18	11.4	13.9	8.3	8.7	16	16.4	5.6	14.3	10.2	9.5	9.5	3	6	5	5	4	4	6	5	5	3
EG10419	>EG10419 gshB Glutathione synthase	Cytoplasmic	A					10.5675	n.def	0.695875	n.def	0.816531	0.902997		n.def	n.def	n.def	n.def	n.def	n.def		0	5.4	8.2	21.8	3.8	14.9	12.7	11.1	21.8	3.8	3.8	21.5	8.2	3.8	8.2	3.8	13.6	14.2	0	1	2	4	1	3	2	2	4	1
EG10420	>EG10420 guaA GMP synthase	Peripheral inner membrane protein facing the cytoplasm	F1			Yes		3.70962	0.0663225	2.64329	0.0533882	3.83233	0.00299869		0.695485	0.594259	1.1276	0.841734	0.784232	0.0784336		26.1	41.1	31.8	47.8	33	30.9	46.1	29.7	33.1	30.7	29.9	36.4	36.4	33.1	48.4	26.3	35.4	28	9	15	11	17	12	12	18	11	14	12
EG10421	>EG10421 guaB Inosine-5-monophosphate (IMP) dehydrogenase	Peripheral inner membrane protein facing the cytoplasm	F1					0.911074	0.942322	1.33237	0.897275	0.526023	0.204957		0.848566	0.57191	0.708629	0.332167	0.601318	0.267714		34.8	46.5	45.5	39.1	35.2	33.6	42.4	37.5	34.8	20.5	42	35.7	43.9	37.3	45.5	42	50.6	41.2	9	14	13	13	12	10	12	9	11	6
EG10422	>EG10422 guaC GMP reductase	Cytoplasmic	A					n.def	n.def	n.def	n.def	n.def	n.def		n.def	n.def	n.def	n.def	n.def	n.def		6.3	16.4	6.3	12.1	2	10.4	17.3	10.4	2	4.3	4.3	8.4	6.3	4.3	4.3	10.4	6.3	6.3	2	4	2	3	1	3	4	3	1	1
EG10423	>EG10423 gyrA DNA gyrase, subunit A	Peripheral inner membrane protein facing the cytoplasm	F1					0.91687	n.def	1.15566	0.831058	10.877	0.410833		n.def	n.def	0.787696	0.360707	n.def	n.def		3.8	25.3	23.2	22.4	23.8	19.9	23.4	19.8	21.9	19.4	20	26.2	19.7	19.2	19.1	19.1	21.9	22.2	2	18	16	15	17	14	16	14	16	13
EG10424	>EG10424 gyrB DNA gyrase, subunit B	Peripheral inner membrane protein facing the cytoplasm	F1	Yes	Yes	Yes		3.03334	0.00581625	3.31804	0.0148932	3.7346	0.0140189		0.63424	0.251752	0.820817	0.43028	0.520595	0.010013		15.5	26	21.1	25.5	24	18.8	32.6	17.4	25.6	10.7	24.3	27	21.9	17.3	23.9	22.4	18.7	17.3	9	16	12	14	14	11	18	11	14	7
EG10425	>EG10425 hdhA 7-alpha-Hydroxysteroid dehydrogenase	Cytoplasmic	A					1.94393	n.def	n.def	n.def	5.1929	n.def		n.def	n.def	n.def	n.def	n.def	n.def		4.3	0	0	0	0	0	0	3.9	4.3	3.9	3.9	3.9	0	11.4	4.3	0	4.3	0	1	0	0	0	0	0	0	1	1	1
EG10427	>EG10427 hemA Glutamyl-tRNA reductase, hemin biosynthesis	Peripheral inner membrane protein facing the cytoplasm	F1					n.def	n.def	n.def	n.def	n.def	n.def		n.def	n.def	n.def	n.def	n.def	n.def		0	0	0	0	0	0	0	0	0	0	0	0	3.1	0	0	0	0	0	0	0	0	0	0	0	0	0	0	0
EG10428	>EG10428 hemB 5-Aminolevulinate dehydratase	Cytoplasmic	A	Yes				2.77959	0.0464337	0.619046	0.502769	0.409237	0.512105		0.437645	0.236601	0.43138	0.404626	0.188791	0.241016		19.8	15.4	23.8	20.1	15.4	11.7	18.5	8.6	13	25.3	17	17.6	14.5	11.7	23.8	15.4	18.5	15.4	4	3	5	4	3	3	5	2	3	6
EG10429	>EG10429 hemC Porphobilinogen deaminase	Cytoplasmic	A					0.399284	0.139157	0.13961	0.239068	0.145955	n.def		0.434472	0.35993	n.def	n.def	n.def	n.def		25.9	20.4	20.1	7.3	18.2	13.1	0	7.7	13.1	13.7	8.3	13.1	20.4	3.5	13.1	16.3	20.4	16.3	6	4	4	2	4	3	0	2	3	4
EG10430	>EG10430 hemD Uroporphyrinogen III cosynthase	Cytoplasmic	A					n.def	n.def	n.def	n.def	n.def	n.def		n.def	n.def	n.def	n.def	n.def	n.def		0	0	0	0	0	0	5.3	0	0	0	0	0	5.3	0	5.3	6.9	0	0	0	0	0	0	0	0	1	0	0	0
EG10432	>EG10432 hemL Glutamate-1-semialdehyde aminomutase	Peripheral inner membrane protein facing the cytoplasm	F1	Yes	Yes	Yes		3.70545	0.0174047	2.7668	0.0183649	4.90319	0.000161854		0.759693	0.557238	0.963555	0.924121	0.732006	0.0353888		20.9	24.6	18.1	17.8	23.7	24.6	20.9	27.5	24.6	20.7	20.7	17.8	18.1	20.7	20.9	23.7	17.8	17.8	6	7	5	5	7	7	6	8	7	6
EG10433	>EG10433 hemX Uroporphyrinogen III methyltransferase	Integral Inner Membrane	B					0.214494	0.0267591	0.133366	0.0419542	0.0519044	0.0601109		0.927051	0.709134	0.227966	0.302163	0.211336	0.2932		5.6	13.2	17	8.4	16	24.9	25.2	23.7	23.7	13	9.4	19.3	27	16.8	13	14.8	15	12	2	3	4	2	4	5	6	5	5	4
EG10434	>EG10434 hemY Predicted protoheme IX biogenesis protein	Integral Inner Membrane	B					19.9908	0.0317407	4.37339	n.def	3.81759	n.def		1.01873	0.922069	0.586534	0.106207	0.597521	0.132079		11.3	4	4	4	5.8	9	4	7.3	4	4	4	4	6.8	4	4	0	4	4	4	1	1	1	2	3	1	2	1	1
EG10435	>EG10435 hflC Membrane bound protease complex, with FtsH and HflK	Integral Inner Membrane	B	Yes	Yes	Yes		4.21346	0.00555053	2.96503	0.0332493	3.36435	0.00285166		0.962001	0.843404	0.75823	0.0436667	0.729418	0.0800212		26	23.1	38	16.2	23.7	32	26	26	34.4	12.9	28.4	24.3	30.5	21.9	12.9	24.3	17.4	19.8	6	5	8	4	5	6	6	6	7	4
EG10436	>EG10436 hflK Membrane bound protease complex with FtsH and HflC	Integral Inner Membrane	B	Yes	Yes	Yes		4.55229	0.0144905	4.50022	0.000181995	5.54633	0.000680331		1.02198	0.904048	0.755862	0.107598	0.772476	0.200581		25.1	18.6	19.8	18.4	25.3	22.4	25.8	25.8	19.3	28.4	19.6	17.4	18.9	21.2	22.7	15.5	27.7	24.8	7	6	5	5	8	6	7	7	5	8
EG10437	>EG10437 hflX GTPase, stimulated by 50S subunit binding, function unknown	Peripheral inner membrane protein facing the cytoplasm	F1					0.741187	0.339115	0.951831	n.def	0.609017	n.def		2.02524	0.108985	n.def	n.def	n.def	n.def		6.6	12.9	12.9	10.3	3.8	10.3	5.9	10.8	0	11.3	6.3	3.8	2.6	8.5	3.8	8.5	3.8	5.9	2	4	4	2	1	2	2	4	0	4
EG10438	>EG10438 hfq Global regulator of sRNA function	Peripheral inner membrane protein facing the cytoplasm	F1	Yes	Yes	Yes		3.97741	0.0295634	5.96977	0.000574152	5.18791	0.00150444		1.24595	0.349497	0.746168	0.0597621	0.929688	0.724526		63.7	63.7	63.7	62.7	63.7	59.8	63.7	60.8	63.7	33.3	38.2	58.8	60.8	58.8	43.1	62.7	60.8	43.1	8	8	8	7	8	6	8	6	8	3
EG10440	>EG10440 ihfA Integration Host Factor (IHF), alpha subunit	Nucleoid, Peripheral inner membrane protein facing the cytoplasm	N,F1					n.def	n.def	n.def	n.def	n.def	n.def		n.def	n.def	n.def	n.def	n.def	n.def		0	0	0	0	0	0	0	20.2	0	9.1	0	0	0	0	0	0	0	0	0	0	0	0	0	0	0	2	0	1
EG10441	>EG10441 ihfB Integration Host Factor (IHF), beta subunit	Nucleoid, Peripheral inner membrane protein facing the cytoplasm	N,F1					1.13762	n.def	0.91653	0.856771	0.828713	0.437321		n.def	n.def	0.469057	0.0969603	n.def	n.def		0	9.6	16	16	16	27.7	25.5	16	16	27.7	16	16	16	27.7	25.5	27.7	16	27.7	0	1	1	1	1	2	2	1	1	2
EG10444	>EG10444 hisA Phosphoribosylformimino-5-aminoimidazole carboxamide ribotide isomerase	Cytoplasmic	A					1.23555	n.def	0.316481	n.def	0.503433	n.def		n.def	n.def	n.def	n.def	n.def	n.def		25.3	26.9	13.1	21.6	15.5	6.9	12.2	13.1	18.4	3.7	6.9	6.9	15.5	6.9	15.5	14.7	20.8	6.9	4	4	2	3	2	1	2	2	3	1
EG10445	>EG10445 hisB Imidazoleglycerolphosphate dehydratase/histidinol phosphatase	Peripheral inner membrane protein facing the cytoplasm	F1	Yes	Yes	Yes		FtsH only	FtsH only	3.86185	0.00382422	5.4145	0.000290472		0.983126	0.953438	1.26014	0.479759	1.23888	0.34203		18.6	19.2	14.6	14.6	21.1	24.8	24.8	14.4	24.5	8.2	2.5	4.5	14.6	7	7	14.6	13.2	7	5	5	4	4	5	6	6	4	6	2
EG10446	>EG10446 hisC Histidinol-phosphate aminotransferase	Cytoplasmic	A					0.373222	n.def	1.33268	n.def	1.11546	n.def		n.def	n.def	n.def	n.def	n.def	n.def		5.6	10.7	13.2	16.6	5.3	16	13.8	10.7	12.9	7.9	16	18.8	18.8	8.1	18.3	13.8	18.3	13.8	2	2	3	4	2	4	3	2	3	3
EG10447	>EG10447 hisD Histidinol dehydrogenase	Cytoplasmic	A					0.589519	0.597743	0.602529	n.def	2.09952	n.def		n.def	n.def	n.def	n.def	n.def	n.def		11.1	5.8	11.3	4.8	8.5	11.1	2.3	8.1	0	10.4	8.1	11.1	10.6	13.6	8.8	5.1	11.1	10.6	4	2	4	2	3	4	1	3	0	4
EG10448	>EG10448 hisF Imidazole glycerol phosphate (IGP) synthase, cyclase subunit	Cytoplasmic	A					8.28936	n.def	n.def	n.def	2.29472	n.def		n.def	n.def	n.def	n.def	n.def	n.def		6.2	9.3	0	6.2	0	12.4	0	15.9	5.8	4.3	12.4	18.2	5.8	22.5	19.8	18.2	10.1	10.5	1	2	0	1	0	2	0	3	1	1
EG10449	>EG10449 hisG ATP-phosphoribosyltransferase	Peripheral inner membrane protein facing the cytoplasm	F1			Yes		1.7529	0.841849	1.98404	0.187145	3.30101	0.0113565		0.362455	0.29599	1.60517	0.517593	0.581802	0.140409		9.4	15.7	15.7	16.4	15.7	20.4	13	7.4	15.7	6	0	13	16.4	12.7	23.1	17.7	16.4	13	2	3	3	3	3	4	2	2	3	2
EG10450	>EG10450 hisH Imidazole glycerol phosphate (IGP) synthase, amidotransferase	Cytoplasmic	A					0.807777	n.def	n.def	n.def	n.def	n.def		n.def	n.def	n.def	n.def	n.def	n.def		0	13.8	8.7	0	0	8.7	8.7	8.7	8.7	8.7	0	14.8	0	0	0	8.7	8.7	0	0	1	1	0	0	1	1	1	1	1
EG10451	>EG10451 hisI PR-ATP pyrophosphatase/PR-AMP cyclohydrolase, bifunctional	Cytoplasmic	A					1.85689	n.def	0.561246	n.def	0.734713	n.def		n.def	n.def	n.def	n.def	n.def	n.def		8.4	0	0	8.4	0	8.4	8.4	8.4	8.4	8.4	0	8.4	8.4	8.4	0	0	8.4	0	1	0	0	1	0	1	1	1	1	1
EG10452	>EG10452 hisP Histidine transport ATP-binding protein	Peripheral inner membrane protein facing the cytoplasm	F1					21.8801	n.def	2.53973	n.def	5.17366	n.def		n.def	n.def	n.def	n.def	n.def	n.def		4.7	4.7	0	11.7	0	4.7	0	4.7	4.7	0	0	4.7	4.7	0	0	4.7	0	0	1	1	0	2	0	1	0	1	1	0
EG10453	>EG10453 hisS Histidine--tRNA ligase	Peripheral inner membrane protein facing the cytoplasm	F1					1.93399	0.17618	1.71025	0.524194	0.713425	0.847096		0.900514	0.843873	0.263741	0.39377	0.237502	0.377145		44.6	52.4	38.9	53.8	35.8	30.2	43.4	36.3	41.3	29	38	36.8	43.2	31.4	45.8	39.9	45.5	34.9	14	16	12	15	10	9	13	10	12	10
EG10454	>EG10454 truA tRNA pseudouridine(38-40) synthase	Cytoplasmic	A					4.09998	n.def	n.def	n.def	n.def	n.def		n.def	n.def	n.def	n.def	n.def	n.def		8.9	0	0	0	6.3	8.1	0	3	3	3.7	8.9	10	0	0	0	0	4.8	0	2	0	0	0	2	2	0	1	1	1
EG10455	>EG10455 skp Periplasmic molecular chaperone for outer membrane proteins	Periplasmic	G	Yes				2.49884	0.00996419	1.69191	0.034325	1.23061	0.399484		0.638152	0.00301882	0.721418	0.274087	0.460374	0.073126		39.1	39.1	39.1	37.9	37.9	37.9	37.9	32.9	37.9	17.4	18.6	32.9	32.9	22.4	37.9	39.1	37.9	37.9	6	6	6	5	5	4	4	3	5	2
EG10457	>EG10457 hns DNA-binding global regulator H-NS	Nucleoid, Peripheral inner membrane protein facing the cytoplasm	N,F1					0.906492	0.583135	0.936132	0.646769	0.529653	0.194587		1.19517	0.696393	0.825631	0.317113	0.986772	0.973929		56.2	21.9	38	38	38	38	27.7	38	38	30.7	38	37.2	38	38	38	32.1	38	32.1	8	3	5	5	5	5	4	6	5	6
EG10458	>EG10458 hsdM DNA methyltransferase M, host modification of foreign DNA	Cytoplasmic	A	Yes		Yes		4.29579	0.0138021	1.59042	0.511937	FtsH only	FtsH only		0.615736	0.348919	0.774982	0.45197	0.477185	0.0181094		9.3	17.6	11.2	1.9	9.8	7	6.2	7.9	7	9.6	2.8	10.4	8.9	6.4	17.8	12.5	7.4	14	4	6	5	1	4	3	3	3	3	4
EG10459	>EG10459 hsdR Endonuclease R, host restriction of foreign DNA	Cytoplasmic	A					0.34827	n.def	n.def	n.def	n.def	n.def		n.def	n.def	n.def	n.def	n.def	n.def		0	1.2	1.2	2.2	2.6	2.6	1.2	2.1	1.2	2.3	2.3	2.3	1.2	0	1.2	2.6	2.6	1.2	0	1	1	1	2	2	1	1	1	2
EG10461	>EG10461 htpG Protein refolding molecular co-chaperone Hsp90, Hsp70-dependent	Peripheral inner membrane protein facing the cytoplasm	F1	Yes	Yes	Yes		16.1305	0.00812735	8.01724	0.000215148	7.95849	0.000295023		1.40946	0.176847	0.932315	0.471116	1.31406	0.232292		31.6	43.8	39.9	51.4	37.2	37.3	46.2	31.6	46	39.1	37.5	47.3	30.3	34.8	45.8	41.3	41.3	42.6	14	22	21	24	18	18	22	15	23	19
EG10462	>EG10462 htpX Zinc metalloprotease HtpX, membrane-bound	Integral Inner Membrane	B					0.776979	n.def	0.911221	n.def	n.def	n.def		n.def	n.def	n.def	n.def	n.def	n.def		3.8	8.5	0	0	12.3	8.5	3.8	0	3.8	3.8	8.5	0	0	0	12.3	0	0	0	1	1	0	0	2	1	1	0	1	1
EG10463	>EG10463 degP Periplasmic, membrane-associated serine endoprotease	Periplasmic	G			Yes		2.50696	0.0907721	2.06032	0.0578244	2.34934	0.0352472		1.27614	0.183109	0.960227	0.824758	1.22539	0.285369		10.1	14.3	11.4	10.1	11.4	11	16.5	17.9	24.1	14.6	10.3	17.1	9.5	11.4	12	11	7.6	6.1	4	5	4	4	4	4	6	7	8	5
EG10465	>EG10465 ribB 3,4-dihydroxy-2-butanone 4-phosphate synthase	Peripheral inner membrane protein facing the cytoplasm	F1					1.44209	0.235188	1.445	0.236415	1.58356	0.127184		0.962927	0.920185	0.898569	0.715475	0.865256	0.705135		24	39.6	39.6	39.6	33.2	26.3	39.6	26.3	26.3	11.1	11.1	33.2	17.5	22.1	39.6	18	21.7	18	6	6	6	7	5	4	7	5	4	2
EG10466	>EG10466 hupA Histone-like protein HU-alpha, HU-2	Nucleoid, Peripheral inner membrane protein facing the cytoplasm	N,F1	Yes		Yes		2.57603	0.017927	1.78961	0.226931	2.19665	0.00781919		0.774542	0.20322	0.801231	0.332045	0.620587	0.0882845		63.3	63.3	57.8	57.8	57.8	57.8	57.8	57.8	57.8	57.8	63.3	57.8	57.8	46.7	46.7	46.7	46.7	32.2	6	6	5	4	5	4	4	4	4	4
EG10467	>EG10467 hupB Histone-like protein HU-beta, HU-1	Nucleoid, Peripheral inner membrane protein facing the cytoplasm	N,F1			Yes		0.310714	0.202569	1.8556	0.2764	FtsH only	FtsH only		1.31827	0.585186	0.550073	0.065074	0.725145	0.452472		65.6	68.9	48.9	52.2	33.3	15.6	33.3	52.2	52.2	52.2	68.9	52.2	52.2	33.3	52.2	33.3	34.4	15.6	4	6	3	3	2	1	2	4	3	3
EG10484	>EG10484 hypB Required for metallocenter assembly in Hydrogenases 1,2,3	Cytoplasmic	A					n.def	n.def	0.0866606	n.def	1.64844	n.def		n.def	n.def	n.def	n.def	n.def	n.def		3.4	0	4.8	8.6	0	9.7	13.4	12.8	5.2	0	0	0	0	8.3	0	3.4	4.8	0	1	0	1	2	0	2	3	3	1	0
EG10489	>EG10489 icd Isocitrate dehydrogenase, NADP(+)-specific	Peripheral inner membrane protein facing the cytoplasm	F1			Yes		13.3367	0.134811	8.33254	0.257227	6.98536	0.0328688		0.647688	0.246166	0.990633	0.972985	0.641621	0.176725		38.2	51.9	49.5	45.7	48.3	29.6	47.6	36.1	48.3	32.2	44.2	43	40.6	28.1	39.9	32.9	43.8	46.4	13	18	17	16	15	10	17	12	16	12
EG10490	>EG10490 argP Inhibitor of chromosome initiation, transcriptional activator, LysR family	Nucleoid	N					n.def	n.def	n.def	n.def	n.def	n.def		n.def	n.def	n.def	n.def	n.def	n.def		5.7	5.7	5.7	0	0	0	0	0	5.7	0	0	5.7	5.7	0	0	5.7	5.7	5.7	1	1	1	0	0	0	0	0	1	0
EG10491	>EG10491 iclR Repressor of aceBA operon	Nucleoid	N					n.def	n.def	3.4451	n.def	0.507953	n.def		n.def	n.def	n.def	n.def	n.def	n.def		0	0	6.6	0	0	6.6	0	4.4	0	0	6.6	6.6	6.6	6.6	0	10.9	6.6	6.6	0	0	1	0	0	1	0	1	0	0
EG10492	>EG10492 ileS Isoleucine--tRNA ligase	Cytoplasmic	A					2.18814	0.80931	0.575785	0.445602	0.973133	0.751585		0.747201	0.642569	1.05857	0.920324	0.790966	0.303817		11.4	23.7	22.8	23.2	20.4	20.1	24.3	20.3	20.3	22.2	25.8	27.8	25.9	31.3	27.4	22.3	27.9	26.7	8	18	16	16	14	14	17	14	14	16
EG10493	>EG10493 ilvA Threonine deaminase	Cytoplasmic	A					1.40413	0.148002	1.75341	0.218622	2.2996	0.266967		0.825068	0.685433	0.846607	0.679264	0.698508	0.166746		19.6	27.4	27.6	28	24.9	23.7	32.3	17.5	20.6	16.3	29.4	31.3	29.6	23.7	32.9	34.8	32.1	32.9	7	10	10	11	10	10	12	8	8	8
EG10494	>EG10494 ilvB Acetohydroxy acid synthase I (AHAS-I)	Cytoplasmic	A		Yes			n.def	n.def	FtsH only	FtsH only	0.595235	0.425478		n.def	n.def	0.708182	0.431048	n.def	n.def		0	4.3	7.8	5.2	6.4	13.9	4.3	7.5	4.3	0	0	4.3	4.3	2.5	7.5	8.9	6.8	6	0	1	3	2	2	5	1	2	1	0
EG10495	>EG10495 ilvC Ketol-acid reductoisomerase	Peripheral inner membrane protein facing the cytoplasm	F1					1.32145	0.648761	1.46993	0.99203	0.259916	0.00549311		0.969645	0.961426	0.459775	0.0283641	0.445819	0.115717		43.2	44.8	43.4	30.8	34.4	36.9	41.1	37.7	45	25.5	38.1	41.1	36	32.8	34.6	36.3	31.2	32.6	19	20	20	13	14	14	17	14	18	11
EG10496	>EG10496 ilvD Dihydroxyacid dehydratase	Peripheral inner membrane protein facing the cytoplasm	F1					0.43293	0.0173007	0.274092	0.0712856	0.369451	0.468177		0.828377	0.72486	0.536853	0.477092	0.444717	0.377005		23.1	26	27.1	32	28.9	17.9	33.4	35.1	27.6	24.2	27.1	25.8	31.3	23.9	28.7	20.1	31.2	31.2	10	10	11	12	11	8	12	14	12	12
EG10497	>EG10497 ilvE Branched-chain amino acid aminotransferase	Cytoplasmic	A					0.884481	0.802047	1.65561	0.953994	0.574496	0.582421		1.48016	0.554676	1.11706	0.87975	1.65343	0.485862		27.2	18.4	25.6	34.3	21.4	18.4	33.7	29.4	26.5	21.4	31.4	28.5	21.4	33.7	29.1	18.4	33	16.8	5	3	5	7	4	3	6	5	5	5
EG10500	>EG10500 ilvI Acetohydroxy acid synthase III (AHAS-III)	Cytoplasmic	A					n.def	n.def	n.def	n.def	n.def	n.def		n.def	n.def	n.def	n.def	n.def	n.def		0	0	0	0	0	0	0	0	2.4	2.3	0	0	0	0	1.6	2.4	0	0	0	0	0	0	0	0	0	0	1	1
EG10502	>EG10502 ilvN Acetohydroxy acid synthase I (AHAS-I) regulatory subunit	Cytoplasmic	A					n.def	n.def	n.def	n.def	n.def	n.def		n.def	n.def	n.def	n.def	n.def	n.def		0	0	15.6	0	0	0	0	10.4	0	0	0	0	0	0	0	0	0	0	0	0	1	0	0	0	0	1	0	0
EG10504	>EG10504 infA Protein chain initiation factor IF1	Cytoplasmic	A					1.92391	0.457746	2.32601	0.129101	2.58384	0.0835425		0.656923	0.490011	0.92086	0.857402	0.604934	0.16164		77.8	77.8	77.8	69.4	52.8	69.4	69.4	47.2	69.4	30.6	77.8	69.4	69.4	69.4	77.8	69.4	77.8	77.8	4	4	4	3	2	3	3	3	3	1
EG10505	>EG10505 infB Protein chain initiation factor IF2	Peripheral inner membrane protein facing the cytoplasm	F1	Yes	Yes	Yes		10.3138	0.0327602	9.54914	0.00267642	11.8291	4.86629e-05		0.565614	0.355807	0.953858	0.906439	0.539515	0.0461308		21.7	40.6	42.8	40.3	42.9	35.1	41.6	31.2	41.3	24.6	32.9	42.6	41.1	32.1	42.7	38.4	36.5	41.9	17	23	26	23	26	22	24	19	25	18
EG10506	>EG10506 infC Protein chain initiation factor IF3	Peripheral inner membrane protein facing the cytoplasm	F1					0.556397	0.16516	1.10584	0.849586	0.983464	0.650085		1.17975	0.575277	0.874309	0.69743	1.03146	0.899367		30.6	25.6	32.8	25.6	25.6	25.6	32.8	25.6	25.6	17.2	38.9	32.8	25.6	25.6	32.8	30.6	25.6	25.6	4	3	4	3	3	3	4	4	4	2
EG10508	>EG10508 ispA Farnesyl diphosphate synthase, isoprenoid biosynthesis	Cytoplasmic	A					0.392888	n.def	n.def	n.def	0.927713	n.def		0.960686	0.889472	n.def	n.def	n.def	n.def		4.3	4.3	4.3	4.3	4.3	4.3	4.3	0	4.3	0	3	0	0	0	0	3	0	0	1	1	1	1	1	1	1	0	1	0
EG10509	>EG10509 katE Catalase HPII, heme d-containing	Cytoplasmic	A					2.34916	n.def	n.def	n.def	n.def	n.def		n.def	n.def	n.def	n.def	n.def	n.def		0	6.9	5.3	0	0	0	0	0	0	2	0	0	0	0	0	0	0	0	0	4	3	0	0	0	0	0	0	1
EG10511	>EG10511 katG Catalase-peroxidase HPI, heme b-containing	Cytoplasmic	A					0.849595	0.540148	0.843786	0.611804	1.11529	0.799266		1.31741	0.378543	0.592285	0.0412113	0.780282	0.189067		8.5	22.2	12.1	11.6	15.3	8.7	17.1	12.1	20.4	9.6	11.3	20.7	19.3	5.5	18.9	15.6	13.8	13.1	3	11	6	5	6	4	8	5	9	7
EG10512	>EG10512 kbl 2-amino-3-ketobutyrate CoA ligase	Peripheral inner membrane protein facing the cytoplasm	F1					2.06962	0.192315	2.54728	0.260597	1.74136	0.161311		1.09205	0.865904	0.63364	0.406165	0.691963	0.412611		16.3	25.1	23.6	26.6	17.8	18.6	12.8	16.6	9.3	23.6	30.9	26.6	19.6	16.6	16.1	21.4	23.4	23.4	5	8	7	7	5	5	4	5	3	8
EG10514	>EG10514 kdpB Potassium-translocating ATPase, B subunit	Integral Inner Membrane	B					n.def	n.def	n.def	n.def	n.def	n.def		n.def	n.def	n.def	n.def	n.def	n.def		1.5	0	0	0	1.5	0	1.5	0	0	2.1	0	0	0	0	0	1.8	0	0	1	0	0	0	1	0	1	0	0	1
EG10518	>EG10518 kdsA 3-deoxy-D-manno-octulosonate 8-phosphate (KDO8-P) synthase	Cytoplasmic	A		Yes			2.38993	0.130822	5.3931	0.000112691	5.69439	0.00456581		1.41174	0.179239	0.613279	0.00814845	0.865793	0.408529		16.5	20.1	13	25.7	13	18.7	25.7	2.8	18.7	15.5	13	18.7	13	13	13	15.5	20.1	13	3	3	2	4	2	3	4	1	3	5
EG10519	>EG10519 kdsB 3-deoxy-manno-octulosonate cytidylyltransferase	Cytoplasmic	A					2.40816	n.def	4.89729	0.00695766	0.592704	n.def		n.def	n.def	n.def	n.def	n.def	n.def		10.5	5.6	5.6	4.8	10.5	10.5	10.5	4.8	4.8	8.9	19.4	13.3	19.4	19.4	19.4	14.5	10.5	22.6	2	1	1	1	2	2	2	1	1	1
EG10523	>EG10523 rsmA 16S rRNA m(6)A1518, m(6)A1519 dimethyltransferase, SAM-dependent	Peripheral inner membrane protein facing the cytoplasm	F1					n.def	n.def	0.314374	n.def	n.def	n.def		n.def	n.def	n.def	n.def	0.674392	0.40138		3.7	11.7	3.7	0	3.7	15.4	15.8	7.7	11.4	0	3.7	11.7	11.7	3.7	3.7	3.7	3.7	3.7	1	2	1	0	1	3	3	1	2	0
EG10525	>EG10525 lacI Transcriptional repressor of lac operon	Peripheral inner membrane protein facing the cytoplasm	F1	Yes	Yes	Yes		4.78521	0.0318909	2.19306	0.0383292	3.04961	0.00299365		0.705483	0.175726	0.905463	0.674418	0.638789	0.143183		32.5	26.4	36.9	33.1	30	29.4	30.6	19.4	33.1	20.6	12.5	12.5	8.9	9.7	15.6	22.8	12.5	9.7	10	9	10	11	9	8	9	7	12	7
EG10528	>EG10528 lamB Maltoporin, maltose high-affinity uptake system	Outer Membrane b-barrel protein	H	Yes				FtsH only	FtsH only	1.63024	0.354414	1.01699	n.def		0.34937	0.0100208	n.def	n.def	n.def	n.def		25.6	28.9	32.7	3.1	6.5	6.5	3.1	3.1	3.1	6.5	0	0	6.5	3.1	9.9	5.6	3.1	3.1	6	7	8	1	2	2	1	1	1	2
EG10529	>EG10529 lepA Back-translocating Elongation Factor EF4, GTPase	Peripheral inner membrane protein facing the cytoplasm	F1					4.08309	0.0902112	1.55516	0.331036	4.60607	0.0852623		1.04757	0.866077	0.639213	0.0278987	0.669618	0.102258		11.5	21.4	25.9	18.5	25.4	19	27.2	17.7	25.4	17.2	20.9	25.5	17.9	22.7	20.5	21.4	25.5	24.2	5	9	11	7	11	9	11	9	11	8
EG10530	>EG10530 lepB Signal peptidase I	Integral Inner Membrane	B					n.def	n.def	n.def	n.def	n.def	n.def		n.def	n.def	n.def	n.def	n.def	n.def		0	0	0	0	0	0	0	0	0	5.9	4.3	7.4	4.3	0	0	0	0	0	0	0	0	0	0	0	0	0	0	2
EG10532	>EG10532 leuS Leucine--tRNA ligase	Cytoplasmic	A					1.30871	0.695238	1.22554	0.835821	0.247084	0.017973		1.22598	0.735605	0.377149	0.0259781	0.462378	0.130871		11.6	19.8	19.8	22.1	20.9	13.6	22.3	13.1	17	20	22.4	23.7	17.2	20.2	23.8	15	23.3	20.9	6	13	13	13	11	7	12	7	10	13
EG10533	>EG10533 lexA Global regulator (repressor) for SOS regulon	Nucleoid	N					2.59077	n.def	n.def	n.def	n.def	n.def		n.def	n.def	n.def	n.def	n.def	n.def		12.9	0	0	8.9	0	6.9	21.8	0	8.9	12.9	0	15.8	6.9	18.3	6.9	6.9	12.9	12.9	2	0	0	1	0	1	3	0	1	2
EG10534	>EG10534 ligA DNA ligase A, NAD(+)-dependent	Cytoplasmic	A			Yes		1.17573	0.824537	1.17416	n.def	FtsH only	FtsH only		n.def	n.def	n.def	n.def	0.967894	0.924897		4	7.9	7.9	2.2	7.2	5.8	8	10.4	6	5.7	8	7.9	4	7.3	8.6	7.6	4	6.3	2	4	4	1	4	3	4	6	3	3
EG10539	>EG10539 livJ Leu/Ile/Val-binding protein, periplasmic, high-affinity transport	Periplasmic	G					n.def	n.def	n.def	n.def	n.def	n.def		n.def	n.def	n.def	n.def	n.def	n.def		0	4.4	0	0	0	0	0	0	0	3.8	4.4	4.4	4.4	4.4	0	4.4	0	4.4	0	1	0	0	0	0	0	0	0	1
EG10540	>EG10540 livK Leucine-specific binding protein, periplasmic, high-affinity transport for leucine	Periplasmic	G					n.def	n.def	n.def	n.def	n.def	n.def		n.def	n.def	n.def	n.def	n.def	n.def		3	0	3	0	3	0	3	3	3	3.8	0	3	0	3	0	0	0	3	1	0	1	0	1	0	1	1	1	1
EG10543	>EG10543 lpd Lipoamide dehydrogenase, NADH-dependent	Peripheral inner membrane protein facing the cytoplasm	F1	Yes	Yes	Yes		4.69863	0.0101614	4.716	0.00565424	7.67031	0.000149226		0.741204	0.577377	1.18798	0.723746	0.880532	0.373499		39.2	47	40.9	39.2	38	32.3	36.7	29.7	40.9	37.6	53	40.9	40.5	33.8	42.8	46	34.2	39.7	15	20	19	14	14	12	14	12	16	13
EG10544	>EG10544 lpp Murein lipoprotein	Outer Membrane Lipoprotein, Peripheral outer membrane protein facing the extra-cellular space	I, F4					1.71133	0.297023	2.32877	0.632758	2.38701	0.86088		0.801372	0.573819	0.538915	0.0981489	0.431872	0.0541765		33.3	33.3	33.3	33.3	33.3	17.9	17.9	17.9	33.3	33.3	33.3	17.9	33.3	33.3	15.4	15.4	15.4	33.3	2	2	2	2	2	1	1	1	2	2
EG10545	>EG10545 lpxA Lipid A synthesis, UDP-N-acetylglucosamine acyltransferase	Cytoplasmic	A	Yes		Yes		2.57688	0.0202292	1.95803	0.08147	3.71077	0.000921559		0.576385	0.402145	1.01662	0.97457	0.585967	0.0816948		10.3	21	17.9	17.6	17.9	14.5	17.6	17.6	17.6	14.5	17.9	17.9	17.6	14.5	17.9	14.5	14.5	14.5	2	4	3	3	3	2	3	3	3	2
EG10546	>EG10546 lpxB Lipid A disaccharide synthase	Peripheral inner membrane protein facing the cytoplasm	F1					n.def	n.def	n.def	n.def	n.def	n.def		n.def	n.def	n.def	n.def	n.def	n.def		7.6	0	4.2	0	0	4.2	0	0	0	0	0	0	0	0	0	0	0	4.2	2	0	1	0	0	1	0	0	0	0
EG10547	>EG10547 lrp Global regulatory protein, Leu responsive	Nucleoid, Peripheral inner membrane protein facing the cytoplasm	N,F1					0.455578	0.0937294	1.82337	n.def	3.11949	n.def		0.993254	0.986518	n.def	n.def	n.def	n.def		9.8	14	14	18.9	18.9	4.9	9.8	14	18.9	23.8	0	18.9	9.8	18.9	18.9	4.9	18.9	9.8	2	2	2	3	3	1	2	2	3	4
EG10550	>EG10550 lysC Aspartokinase III	Cytoplasmic	A					1.23205	n.def	1.33148	0.0789875	0.444889	0.235808		n.def	n.def	0.368831	0.289854	n.def	n.def		5.6	18.3	12.9	23.4	8.9	12.7	21.6	10.7	24.9	10.5	18.3	16.9	16.9	8.7	19.6	18.3	20.5	16.9	2	6	4	7	3	4	7	4	8	3
EG10552	>EG10552 lysS Lysine--tRNA ligase, constitutive	Cytoplasmic	A					4.59432	0.0538427	1.30527	0.19111	1.85737	0.00934164		1.01706	0.941964	0.654938	0.014358	0.666113	0.0564239		23.4	49.1	51.1	43.2	41.2	43.6	49.1	44	46.7	26.9	26.7	46.1	40.8	41.6	45.9	40.4	40.6	32.5	6	14	14	12	11	12	14	11	13	7
EG10553	>EG10553 lysU Lysine--tRNA ligase, heat inducible	Cytoplasmic	A					0.491544	n.def	2.93941	0.0604602	1.31534	0.349767		n.def	n.def	0.448682	0.160602	n.def	n.def		13.5	16.6	17.4	18.4	16.6	21.8	23.8	15.8	19	19.4	16	18.4	16.6	15.2	15.4	14.3	23.4	15.6	3	3	5	4	4	5	6	4	5	4
EG10558	>EG10558 malK Maltose transport complex, ATP-binding subunit	Peripheral inner membrane protein facing the cytoplasm	F1	Yes				FtsH only	FtsH only	n.def	n.def	n.def	n.def		0.218032	0.15545	n.def	n.def	n.def	n.def		20.8	25.3	25.3	6.2	15.4	11.9	0	0	0	0	0	0	0	0	0	0	0	0	5	7	7	1	3	3	0	0	0	0
EG10559	>EG10559 malM Periplasmic protein in malK operon, function unknown	Periplasmic	G					n.def	n.def	n.def	n.def	n.def	n.def		n.def	n.def	n.def	n.def	n.def	n.def		0	0	0	0	0	4.2	0	4.2	0	4.2	0	0	0	0	0	0	0	0	0	0	0	0	0	1	0	1	0	1
EG10560	>EG10560 malP Maltodextrin phosphorylase	Integral Inner Membrane	B	Yes				9.85208	0.00399765	2.17504	0.467968	0.603543	0.202919		0.267496	0.102212	0.312096	0.0430768	0.0834845	0.0120695		9.5	23.3	19.2	15.4	14.7	14.2	13.4	7.5	13.6	11.7	12.8	14.3	11.4	11	19.6	14.6	16.7	16.3	7	16	14	9	11	10	9	6	9	8
EG10561	>EG10561 malQ Amylomaltase	Peripheral inner membrane protein facing the cytoplasm	F1					n.def	n.def	1.15562	n.def	0.968024	n.def		n.def	n.def	n.def	n.def	n.def	n.def		0	4.9	0	0	2.3	2.3	2.3	2.3	4	1.4	1.4	1.7	1.4	4	2.3	0	1.7	1.4	0	1	0	0	1	1	1	1	2	1
EG10562	>EG10562 malT ATP-dependent transcriptional activator for the mal regulon	Nucleoid, Peripheral inner membrane protein facing the cytoplasm	N,F1					n.def	n.def	n.def	n.def	n.def	n.def		n.def	n.def	n.def	n.def	n.def	n.def		0	1.7	1.7	0	0	0.8	0	0	0	0	0.8	0.8	0	0	3	0	3	0	0	1	1	0	0	1	0	0	0	0
EG10566	>EG10566 manA Mannose-6-phosphate isomerase	Cytoplasmic	A					0.787189	0.519031	0.565854	0.90686	1.72495	n.def		0.776557	0.731142	n.def	n.def	n.def	n.def		32.2	12	21	15.9	24.6	20.2	23.3	10.5	24.8	18.9	19.7	24.8	18.4	7.2	14.3	18.2	21.5	14.3	8	2	5	3	6	5	5	2	6	5
EG10567	>EG10567 manX Mannose permease, EIIAB component	Peripheral inner membrane protein facing the cytoplasm	F1	Yes	Yes	Yes		4.08199	0.0268306	2.69041	0.0475825	3.4088	0.00267376		0.924129	0.837151	0.823954	0.558182	0.76144	0.171427		18.3	14.2	22.3	24.1	16.1	22	22	9.9	18.3	13.3	18.6	16.1	11.8	13.9	16.4	11.8	10.5	18.6	4	3	5	5	3	5	5	2	4	3
EG10568	>EG10568 manY Mannose permease, EIIC component	Integral Inner Membrane	B					n.def	n.def	n.def	n.def	n.def	n.def		n.def	n.def	n.def	n.def	n.def	n.def		7.1	0	0	0	7.1	7.1	0	7.1	7.1	0	7.1	7.1	0	7.1	7.1	7.1	0	4.5	1	0	0	0	1	1	0	1	1	0
EG10569	>EG10569 manZ Mannose permease, EIID component	Integral Inner Membrane	B					n.def	n.def	n.def	n.def	0.103035	n.def		n.def	n.def	n.def	n.def	n.def	n.def		5.3	0	3.5	3.5	0	3.5	4.2	0	0	0	0	0	0	0	3.5	3.5	0	3.5	1	0	1	1	0	1	1	0	0	0
EG10570	>EG10570 map Methionine aminopeptidase	Peripheral inner membrane protein facing the cytoplasm	F1					1.75075	0.125082	1.76358	0.074376	3.49551	0.0551834		0.879636	0.681391	0.57895	0.0821102	0.509265	0.0520443		18.2	23.5	26.5	31.8	27.3	27.3	31.8	18.2	17.8	9.1	9.1	14	17.4	26.5	18.2	9.8	22.3	9.1	4	5	5	5	5	5	6	4	4	2
EG10572	>EG10572 mazG Nucleoside triphosphate pyrophosphohydrolase, non-specific	Cytoplasmic	A					n.def	n.def	n.def	n.def	n.def	n.def		n.def	n.def	n.def	n.def	n.def	n.def		4.2	4.2	6.8	0	0	4.2	0	0	0	0	0	0	0	4.2	4.2	0	0	4.2	1	1	2	0	0	1	0	0	0	0
EG10576	>EG10576 mdh Malate dehydrogenase, NAD-dependent	Peripheral inner membrane protein facing the cytoplasm	F1					1.43546	0.600432	0.652685	0.209897	1.79331	0.3665		0.818334	0.646596	1.27422	0.513637	1.04274	0.884682		59.9	63.5	52.6	52.2	59.6	59.3	56.7	56.7	53.5	39.1	55.4	55.8	62.8	49.4	53.5	49.7	59.6	60.3	14	15	12	12	14	14	13	13	13	11
EG10581	>EG10581 metA Homoserine O-transsuccinylase	Cytoplasmic	A					1.48933	n.def	0.989474	n.def	n.def	n.def		n.def	n.def	n.def	n.def	n.def	n.def		0	0	12	12	0	3.9	3.9	0	3.9	3.9	0	0	0	3.9	0	8.1	3.9	0	0	0	2	2	0	1	1	0	1	1
EG10582	>EG10582 metB Cystathionine gamma-synthase	Cytoplasmic	A					1.45181	n.def	n.def	n.def	n.def	n.def		n.def	n.def	n.def	n.def	n.def	n.def		11.4	2.8	8.5	3.4	11.4	5.7	5.7	8.5	10.9	3.4	6.7	11.9	8.5	2.3	8.5	3.4	3.4	6.7	3	1	2	1	3	2	2	3	3	1
EG10583	>EG10583 metC Cystathionine beta-lyase	Cytoplasmic	A					n.def	n.def	0.488104	n.def	n.def	n.def		n.def	n.def	n.def	n.def	n.def	n.def		6.3	3.5	6.3	3.5	6.3	6.3	6.3	0	3.5	2.5	0	6.3	6.3	8.1	10.9	6.3	8.1	10.9	2	1	2	1	2	2	2	0	1	1
EG10584	>EG10584 metE Methionine synthase, cobalamin-independent	Cytoplasmic	A					0.540696	0.178739	0.388265	0.120286	1.35472	0.587379		0.858661	0.579524	0.714166	0.179722	0.613226	0.108008		8.2	13.5	19.7	18.2	16.6	15.5	19.4	10.5	17.7	15.4	10.5	23	18.9	16.2	18.1	15.5	21.9	18.6	4	7	12	10	10	9	11	6	10	9
EG10585	>EG10585 metF 5,10-Methylenetetrahydrofolate reductase	Cytoplasmic	A					n.def	n.def	n.def	n.def	n.def	n.def		n.def	n.def	n.def	n.def	n.def	n.def		8.8	6.8	9.5	3.4	10.1	3.4	3.4	3.4	12.8	0	6.8	0	10.1	6.1	0	0	10.1	3.4	3	1	2	1	2	1	1	1	3	0
EG10586	>EG10586 metG Methionine--tRNA ligase	Peripheral inner membrane protein facing the cytoplasm	F1	Yes	Yes			2.52236	0.0374217	2.92036	0.0263729	1.49658	0.0691448		0.976218	0.912943	0.684446	0.0337325	0.668169	0.0909589		15.7	25	27.6	19.4	23.5	21.9	33.8	19.4	28.8	28.4	27.6	26.6	27.8	28.8	30	23.2	27.3	30	8	14	15	10	12	11	19	10	15	15
EG10587	>EG10587 metH Methionine synthase, cobalamin-dependent	Peripheral inner membrane protein facing the cytoplasm	F1	Yes		Yes		4.55855	0.00593762	1.80402	0.22953	2.32688	0.0268762		0.502855	0.319129	0.901704	0.81812	0.453426	0.0079551		9.6	26.3	23.5	16.9	22.9	19.4	25.4	16.2	24	11.7	13.8	21.6	26.7	18.3	20.3	17.8	25.3	22.2	10	22	21	15	21	17	21	15	21	12
EG10589	>EG10589 metK S-adenosylmethionine synthase	Peripheral inner membrane protein facing the cytoplasm	F1	Yes	Yes	Yes		5.35573	0.0224236	10.8657	0.0106025	13.9583	0.0277964		0.601884	0.245543	0.759451	0.332866	0.457101	0.00192323		38.8	53.9	53.6	47.9	48.2	43.2	43.2	27.3	48.2	43.5	47.9	45.3	40.4	30.5	51	46.4	41.9	51	11	15	13	12	13	11	11	8	13	13
EG10590	>EG10590 metL Aspartokinase II-homoserine dehydrogenase II	Peripheral inner membrane protein facing the cytoplasm	F1					1.71623	0.425719	1.11708	0.549468	2.08611	0.190113		1.14756	0.782188	0.888933	0.73876	1.02011	0.959738		1.6	11.6	7.5	7.7	6	6	14.1	8.5	8.5	5.6	7	9.8	7.3	5.9	13.6	8.9	10.2	9.9	1	8	5	5	4	4	9	6	6	4
EG10591	>EG10591 metR Positive regulatory gene for metE and metH	Nucleoid	N					n.def	n.def	n.def	n.def	n.def	n.def		n.def	n.def	n.def	n.def	n.def	n.def		5.7	0	0	0	0	0	0	5.7	0	0	0	0	0	0	0	0	0	0	1	0	0	0	0	0	0	1	0	0
EG10595	>EG10595 miaA Dimethylallyl diphosphate:tRNA dimethylallyltransferase	Cytoplasmic	A					3.30188	n.def	n.def	n.def	n.def	n.def		n.def	n.def	n.def	n.def	n.def	n.def		3.8	0	0	0	0	0	0	0	0	3.8	0	0	0	0	0	0	0	0	1	0	0	0	0	0	0	0	0	1
EG10596	>EG10596 minC Inhibition of FtsZ ring polymerization	Cytoplasmic	A					1.05954	n.def	2.18421	n.def	2.08072	n.def		n.def	n.def	n.def	n.def	n.def	n.def		14.3	3	7.4	11.3	3.9	11.3	3.9	11.3	11.3	7.8	7.4	11.3	11.3	11.3	11.3	11.3	14.3	7.4	3	1	1	2	1	2	1	2	2	2
EG10597	>EG10597 minD Inhibition of FtsZ ring polymerization	Peripheral inner membrane protein facing the cytoplasm	F1					1.80709	0.37541	1.57904	0.327379	2.37613	0.128477		0.789888	0.414056	1.0293	0.907626	0.813029	0.463209		32.6	34.4	29.3	36.7	29.3	29.3	29.3	34.4	34.4	21.5	24.4	22.6	34.4	29.3	17.8	27.8	29.3	22.6	6	6	5	7	5	5	5	6	6	4
EG10598	>EG10598 minE Blocks MinCD inhibition of FtsZ polymerization at cell center	Peripheral inner membrane protein facing the cytoplasm	F1					4.0084	n.def	3.69389	n.def	n.def	n.def		0.9135	0.697639	0.787288	0.50976	0.719187	0.40349		37.5	9.1	9.1	33	40.9	9.1	37.5	18.2	40.9	0	27.3	51.1	51.1	27.3	9.1	37.5	51.1	37.5	3	1	1	3	3	1	3	1	3	0
EG10599	>EG10599 groL Chaperonin Cpn60	Peripheral inner membrane protein facing the cytoplasm	F1	Yes	Yes	Yes		4.31006	0.00130494	4.7259	5.16939e-05	6.57343	6.69913e-05		1.66017	0.00337598	0.955959	0.67734	1.58706	0.00167965		64.8	68.4	65.5	60.9	66.2	63.3	63.3	63.3	68.1	51.5	71	69.5	64.1	64.2	65.1	67.5	69.3	64.8	30	27	26	24	24	23	24	23	27	22
EG10600	>EG10600 groS Chaperonin Cpn10	Peripheral inner membrane protein facing the cytoplasm	F1					1.80164	0.242131	0.434613	0.316247	1.40943	0.754195		0.451893	0.436994	1.37375	0.681328	0.620787	0.262008		55.7	64.9	88.7	88.7	75.3	62.9	75.3	42.3	55.7	64.9	88.7	55.7	88.7	72.2	75.3	88.7	75.3	75.3	4	5	6	7	6	4	5	3	4	5
EG10603	>EG10603 mprA emrAB repressor, also regulates microcin synthesis	Nucleoid	N		Yes	Yes		4.71813	0.0162296	FtsH only	FtsH only	FtsH only	FtsH only		1.09031	0.481892	0.90777	0.604825	0.989752	0.951821		7.4	7.4	7.4	14.8	15.9	15.9	23.3	15.9	15.9	11.9	7.4	7.4	7.4	7.4	7.4	7.4	7.4	7.4	1	1	1	2	2	2	3	2	2	2
EG10604	>EG10604 mraY UDP-N-acetylmuramoyl-pentapeptide:undecaprenyl-PO4 phosphatase	Integral Inner Membrane	B		Yes	Yes		2.24059	n.def	FtsH only	FtsH only	FtsH only	FtsH only		n.def	n.def	0.534926	0.150823	n.def	n.def		2.2	5.8	5.8	5.8	5.8	5.8	5.8	5.8	5.8	5.8	5.8	5.8	2.2	2.2	5.8	5.8	2.2	2.2	1	2	2	2	2	2	2	2	2	2
EG10605	>EG10605 mrcB Murein polymerase, PBP1B	Integral Inner Membrane	B					0.486407	n.def	37.1922	n.def	n.def	n.def		n.def	n.def	n.def	n.def	n.def	n.def		0	3.8	2	0	2	1.2	3.7	1.7	1.2	0	1.8	5.3	1.7	1.7	1.7	0	4.9	2.4	0	2	1	0	1	1	2	1	1	0
EG10608	>EG10608 mreB Cell wall structural actin-like protein in MreBCD complex	Peripheral inner membrane protein facing the cytoplasm	F1	Yes	Yes	Yes		8.21992	0.000478133	11.8061	0.00103372	17.3099	0.000496327		0.781578	0.357022	0.898485	0.576454	0.702236	0.0625618		32.6	30	28.5	30	28.5	32.6	34	28	33.7	25.6	30	18.4	28.5	23.6	21.9	26.5	18.4	25.4	12	9	9	11	10	10	12	9	11	8
EG10611	>EG10611 mrp Function unknown	Cytoplasmic	A					0.179012	n.def	1.73113	n.def	3.55754	n.def		n.def	n.def	n.def	n.def	1.02062	0.940829		4.6	4.6	7	0	0	7	4.6	4.3	2.4	2.4	4.3	4.3	2.4	8.9	8.9	0	4.6	4.6	1	1	2	0	0	2	1	2	1	1
EG10613	>EG10613 msbA Lipid exporter, fused permease and ATPase components	Integral Inner Membrane	B					1.93123	n.def	0.827324	n.def	1.54455	n.def		n.def	n.def	n.def	n.def	0.643103	0.264422		3.4	5	5.3	3.4	5	5	5	6.9	5.3	1.9	6.9	5.3	5.3	6.7	7.6	1.5	6.9	6.9	1	2	2	1	2	2	2	3	2	1
EG10615	>EG10615 mtlA Mannitol-specific Enzyme IIABC of PTS transport system	Integral Inner Membrane	B					n.def	n.def	n.def	n.def	n.def	n.def		n.def	n.def	n.def	n.def	n.def	n.def		0	0	0	0	0	0	1.6	1.6	0	0	1.6	1.6	0	0	0	0	0	0	0	0	0	0	0	0	1	1	0	0
EG10616	>EG10616 mtlD Mannitol-1-phosphate dehydrogenase, NAD-dependent	Cytoplasmic	A					n.def	n.def	n.def	n.def	n.def	n.def		n.def	n.def	n.def	n.def	n.def	n.def		0	0	0	0	0	4.5	0	4.5	0	0	3.1	3.1	0	0	0	0	0	0	0	0	0	0	0	1	0	1	0	0
EG10618	>EG10618 mukB Chromosome condensin MukBEF, ATPase and DNA-binding subunit	Nucleoid, Peripheral inner membrane protein facing the cytoplasm	N,F1					1.35814	n.def	7.6296	0.322846	7.58581	0.212068		n.def	n.def	1.09112	0.749533	n.def	n.def		1.1	8.9	5.1	9.5	4.4	7.4	7.5	5.9	4.8	3.8	4	8.3	5.8	5	4.6	7.8	7.6	7.1	1	9	7	11	5	9	8	7	7	4
EG10619	>EG10619 murC UDP-N-acetylmuramate:L-alanine ligase	Peripheral inner membrane protein facing the cytoplasm	F1		Yes			3.30178	n.def	3.73975	0.00845881	4.49966	0.00090479		n.def	n.def	0.678198	0.0668137	n.def	n.def		0	9.6	9.6	11	9.6	14.7	20.6	7.9	17.5	11.2	9.6	12.4	7.3	0	17.7	9.6	5.1	14.7	0	2	2	3	2	3	5	2	4	4
EG10620	>EG10620 murD D-glutamic acid adding enzyme	Cytoplasmic	A					0.458293	n.def	2.17487	n.def	114.15	n.def		n.def	n.def	n.def	n.def	n.def	n.def		8.7	3.4	3.4	11	3.4	6.2	3.4	8.2	5.5	8.7	11.4	13.5	3.4	11.6	8	14.4	2.7	5.9	3	1	1	3	1	2	1	2	1	3
EG10621	>EG10621 murE meso-diaminopimelate adding enzyme	Cytoplasmic	A		Yes	Yes		2.55873	0.0547615	2.25884	0.00199638	2.95739	0.0158818		0.828919	0.456117	0.894994	0.67954	0.741878	0.16702		12.7	22.6	18	23.2	16.6	19.6	30.1	12.3	25.5	4.6	7.1	4.6	5.7	4	18	13.5	11.7	4.6	5	8	6	8	6	7	10	5	9	2
EG10622	>EG10622 murF D-alanyl:D-alanine adding enzyme	Cytoplasmic	A	Yes	Yes	Yes		2.73302	0.0273533	3.26491	0.00207833	2.87446	0.00118966		0.90532	0.723056	0.624799	0.0534614	0.565643	0.0121547		7.5	13.9	9.1	11.5	9.1	9.1	9.1	9.1	9.1	10.8	2.4	6.4	6.4	6.4	6.4	6.4	6.4	6.4	3	4	3	5	3	3	3	3	3	4
EG10623	>EG10623 murG N-acetylglucosaminyl transferase	Peripheral inner membrane protein facing the cytoplasm	F1		Yes	Yes		4.0015	n.def	FtsH only	FtsH only	FtsH only	FtsH only		1.23129	0.679604	0.959804	0.904571	1.1818	0.668523		11.8	8.7	3.4	15.5	15.5	8.7	18.9	12.1	8.7	3.4	3.4	5.4	15.5	3.4	6.8	0	21.4	5.4	3	2	1	3	3	2	4	3	2	1
EG10625	>EG10625 mutS Methyl-directed mismatch repair protein	Nucleoid	N					n.def	n.def	n.def	n.def	0.485664	n.def		n.def	n.def	n.def	n.def	n.def	n.def		0	1.4	1.9	0	0	0	0	0	1.4	0	0	1.2	0	0	1.2	1.9	1.9	2	0	1	1	0	0	0	0	0	1	0
EG10626	>EG10626 mutT 8-oxo-dGTPase, antimutator	Cytoplasmic	A					n.def	n.def	n.def	n.def	n.def	n.def		n.def	n.def	n.def	n.def	n.def	n.def		0	0	0	0	0	0	7.8	0	0	0	0	0	7.8	0	0	0	0	0	0	0	0	0	0	0	1	0	0	0
EG10630	>EG10630 nadA Quinolinate synthase, [4Fe-4S] cluster subunit, A protein	Cytoplasmic	A					0.730526	n.def	n.def	n.def	n.def	n.def		n.def	n.def	n.def	n.def	n.def	n.def		0	3.7	0	0	0	0	0	0	0	2	5.8	0	0	0	3.7	2	0	0	0	1	0	0	0	0	0	0	0	1
EG10631	>EG10631 nadB L-aspartate oxidase, FAD-dependent	Cytoplasmic	A	Yes		Yes		FtsH only	FtsH only	0.874232	0.661628	FtsH only	FtsH only		0.685895	0.6349	2.12488	0.421296	1.45745	0.280874		4.8	6.9	17.2	2.8	6.9	3.7	12.6	3.7	6.9	2	2	4.8	2	2	5	2	3.7	2	2	3	7	1	3	2	5	2	3	1
EG10632	>EG10632 nagA N-acetylglucosamine-6-phosphate deacetylase	Cytoplasmic	A					0.255537	n.def	0.860367	n.def	0.581659	n.def		n.def	n.def	n.def	n.def	2.45	0.26911		3.1	5	3.1	3.9	0	3.9	7.1	7.1	7.1	7.1	3.1	7.1	3.9	7.1	7.1	7.1	7.1	3.1	1	2	1	1	0	1	2	2	2	2
EG10633	>EG10633 nagB Glucosamine-6-phosphate deaminase	Peripheral inner membrane protein facing the cytoplasm	F1					3.91556	n.def	4.99364	n.def	n.def	n.def		n.def	n.def	n.def	n.def	1.01678	0.971375		4.5	8.6	8.6	0	4.5	8.6	4.1	8.6	8.6	0	0	4.1	4.1	0	0	4.1	0	0	1	2	2	0	1	2	1	2	2	0
EG10634	>EG10634 nagD UMP phosphatase	Cytoplasmic	A	Yes		Yes		2.32448	0.0240089	1.78303	0.0738903	3.96398	0.000633889		1.06212	0.875042	0.990548	0.981907	1.05208	0.772152		46.8	49.2	49.2	49.2	49.2	42.8	49.2	40.8	49.2	35.6	29.6	49.2	49.2	42.8	45.6	40.8	45.6	34.8	7	8	8	8	8	6	8	6	8	6
EG10635	>EG10635 nagE PTS system EIIABC(Nag) component	Integral Inner Membrane	B					0.184496	n.def	0.273487	n.def	0.735937	0.328883		n.def	n.def	1.41042	0.5702	n.def	n.def		2	1.7	1.7	1.7	1.7	1.7	4.8	4.9	1.7	6.9	3.5	3.7	4.8	2	1.7	1.7	4.8	1.7	1	1	1	1	1	1	2	2	1	3
EG10636	>EG10636 nagC Transcriptional regulator of nag operon	Nucleoid	N					1.56535	n.def	n.def	n.def	n.def	n.def		n.def	n.def	n.def	n.def	0.632317	0.07936		6.4	3.9	6.4	3.9	6.4	7.9	3.9	6.4	6.9	2.5	7.9	3.9	3.9	3.9	3.9	3.9	0	3.9	2	1	2	1	2	2	1	2	2	1
EG10637	>EG10637 nanA N-Acetylneuraminate lyase (aldolase)	Cytoplasmic	A					n.def	n.def	n.def	n.def	n.def	n.def		n.def	n.def	n.def	n.def	n.def	n.def		6.4	0	6.4	0	0	0	0	0	0	0	0	0	0	0	0	0	0	0	1	0	1	0	0	0	0	0	0	0
EG10643	>EG10643 narL Two-component regulator protein for nitrate/nitrite response	Nucleoid	N		Yes	Yes		n.def	n.def	FtsH only	FtsH only	FtsH only	FtsH only		n.def	n.def	0.257208	0.100902	n.def	n.def		17.6	20.4	8.8	24.5	29.2	41.7	32.9	13	20.4	4.6	12	12.5	4.2	8.8	8.8	8.8	8.8	17.1	3	3	2	3	4	6	5	3	3	1
EG10649	>EG10649 ndh Respiratory NADH dehydrogenase II	Peripheral inner membrane protein facing the cytoplasm	F1		Yes	Yes		1.92062	0.331688	2.38869	0.0356462	FtsH only	FtsH only		1.73828	0.320697	0.914033	0.732087	1.58884	0.343682		3.2	12	12	12.7	9.2	14.5	26.3	17.1	14.5	10.1	3.2	11.5	22.4	18.2	7.4	13.1	9.7	7.4	1	3	3	3	3	4	7	5	4	4
EG10650	>EG10650 ndk Nucleoside diphosphate kinase	Peripheral inner membrane protein facing the cytoplasm	F1					0.703895	0.356743	0.802881	0.642374	0.551778	0.199818		0.668133	0.457907	1.57548	0.465615	1.05263	0.895589		49.7	49.7	49.7	49.7	49.7	35	43.4	37.8	49.7	39.9	41.3	49.7	43.4	33.6	33.6	37.8	43.4	49.7	5	5	5	5	5	3	4	4	5	4
EG10651	>EG10651 nfo AP endodeoxyribonuclease IV	Cytoplasmic	A					0.528295	n.def	0.491298	n.def	0.762094	n.def		n.def	n.def	n.def	n.def	n.def	n.def		0	3.9	0	11.2	0	0	0	4.6	3.9	7.4	0	3.9	0	3.9	7.4	0	0	3.9	0	1	0	2	0	0	0	1	1	1
EG10657	>EG10657 nlpA Lipoprotein-28, inner membrane protein, function unknown	Inner Membrane Lipoprotein	E	Yes				FtsH only	FtsH only	0.571036	n.def	0.497626	n.def		1.25746	0.0505973	0.596801	0.0160677	0.750456	0.0953727		19.5	13.6	16.9	15.8	11	5.9	5.9	19.1	10.7	13.2	8.5	13.2	13.2	14.3	8.5	8.5	13.2	5.9	4	3	3	3	2	1	1	4	2	3
EG10658	>EG10658 bamC Tandem domain lipoprotein in BamABCDE OM biogenesis complex	Outer Membrane Lipoprotein	I	Yes				5.94777	0.0219612	4.0776	0.0543891	5.72043	n.def		1.28315	0.467167	0.515588	0.043225	0.661575	0.0582158		15.4	25.3	8.1	21.8	7.8	21.5	17.7	15.4	13.1	14	15.1	13.1	4.9	7.6	7.6	15.4	4.9	20.3	4	6	2	5	2	4	4	4	3	4
EG10660	>EG10660 nrdA Ribonucleoside-diphosphate reductase 1, alpha subunit	Peripheral inner membrane protein facing the cytoplasm	F1		Yes			3.83753	0.129026	2.87711	0.0187957	6.01256	0.116747		0.770421	0.570215	0.717195	0.296944	0.552542	0.0318046		8.5	16.7	21.8	9.3	12.1	13.5	15	15	18.3	18.3	16.7	20	10.4	15.8	15.9	13.3	17.1	17	6	10	13	7	8	9	10	10	12	13
EG10661	>EG10661 nrdB Ribonucleoside-diphosphate reductase 1, beta subunit	Cytoplasmic	A					1.18502	0.738768	1.02272	0.829784	2.67173	n.def		1.46021	0.526876	n.def	n.def	n.def	n.def		11.4	8.5	14.9	12.5	11.4	14.9	8.5	8.5	9	10.4	5.6	14.6	8.5	8.5	13.3	9	5.6	9	3	2	4	4	3	4	2	2	2	3
EG10663	>EG10663 nadE NAD synthase, ammonia dependent	Peripheral inner membrane protein facing the cytoplasm	F1					1.01925	0.69077	0.563956	0.211502	0.672743	0.267438		1.13797	0.582233	1.4173	0.237471	1.61284	0.042239		35.6	54.2	39.6	50.9	36.4	33.5	36	26.5	36.4	17.1	20.4	36.4	31.6	27.6	46.5	28	44.4	41.5	7	10	8	9	7	6	7	6	7	5
EG10665	>EG10665 nusA Transcription termination/antitermination L factor	Nucleoid, Peripheral inner membrane protein facing the cytoplasm	N,F1					1.07499	0.490598	2.49752	0.455225	6.8757	0.12427		3.31192	0.397486	0.608503	0.00468343	2.01531	0.532318		42.8	50.7	43.4	40.4	41	41.4	33.3	37.8	39.2	26.1	25.9	44	48.3	30.5	44.4	43	47.7	36.4	15	19	14	13	14	14	11	13	13	11
EG10666	>EG10666 nusB Transcription termination/antitermination factor	Cytoplasmic	A			Yes		0.942614	0.841006	1.83039	0.0973102	5.02672	0.000536012		1.02657	0.944017	0.829348	0.367836	0.85138	0.577454		43.2	43.2	37.4	29.5	20.9	31.7	35.3	20.9	43.2	20.9	20.9	29.5	22.3	20.9	37.4	37.4	43.2	43.2	5	5	4	3	3	3	4	3	5	3
EG10667	>EG10667 nusG Stabilizes phage lambda protein N-NusA-RNAP antitermination complex	Peripheral inner membrane protein facing the cytoplasm	F1		Yes			1.67113	0.893921	3.35718	0.0253368	1.24103	0.84269		1.22892	0.519225	0.625424	0.231128	0.768599	0.489925		29.8	40.9	36.5	34.3	40.9	33.1	40.9	33.1	33.1	9.9	46.4	40.3	56.4	37	55.2	33.1	22.1	29.3	5	5	4	5	5	4	5	4	4	2
EG10669	>EG10669 ompA Outer membrane protein A	Outer Membrane b-barrel protein	H		Yes	Yes		2.8318	0.104874	2.27625	0.00581698	5.45234	0.00883239		1.09938	0.634944	0.730275	0.0367521	0.80285	0.229711		37.9	39.9	37.3	35.8	39.9	41.3	37.9	30.6	39.9	25.7	39.9	39.9	31.2	36.1	43.4	32.1	43.4	43.4	10	9	9	9	10	10	9	8	10	8
EG10671;EG10729;EG13375	>EG10671 ompF Outer membrane porin F	Outer Membrane b-barrel protein	H	Yes	Yes	Yes		3.94935	0.0321745	3.34415	0.00546161	6.21831	0.000828854		0.91985	0.644428	0.833059	0.153967	0.766289	0.138001		82.3	87.3	70.7	77.9	70.2	62.2	73.2	76	77.9	40.1	69.1	64.1	53.6	70.2	60.8	51.9	70.2	53	18	19	16	17	16	13	15	15	17	10
EG10672	>EG10672 ompR Response regulator for osmoregulation	Nucleoid, Peripheral inner membrane protein facing the cytoplasm	N,F1	Yes	Yes	Yes		2.14045	0.0210033	3.07114	0.0330376	2.15879	0.0394933		1.14072	0.626078	0.929117	0.72821	1.05986	0.82659		32.6	32.6	25.1	33.9	26.4	14.2	29.3	18.4	29.3	21.8	22.2	33.9	26.4	14.2	29.7	22.2	29.7	32.6	6	6	4	5	4	2	5	3	5	4
EG10674	>EG10674 oppA Oligopeptide-binding protein, periplasmic	Periplasmic	G					0.824554	0.518944	0.732204	0.281781	1.43087	0.032456		0.925239	0.569134	1.48242	0.0528643	1.3716	0.076057		12.7	31.9	27.6	34.6	22.7	21.5	25.2	12.5	25.8	21.2	24.5	36.3	24.5	19.2	31.3	20.4	32.4	17.9	5	9	9	10	7	7	8	5	8	8
EG10676	>EG10676 oppC Oligopeptide transport, permease	Integral Inner Membrane	B					n.def	n.def	n.def	n.def	n.def	n.def		n.def	n.def	n.def	n.def	n.def	n.def		0	0	0	0	0	0	3.6	3.6	3.6	0	0	0	3.6	0	0	0	0	0	0	0	0	0	0	0	1	1	1	0
EG10677	>EG10677 oppD Oligopeptide transport, ATP-binding protein	Peripheral inner membrane protein facing the cytoplasm	F1					n.def	n.def	5.83671	n.def	0.500326	n.def		1.11925	0.733462	0.619011	0.554055	0.692826	0.633978		6.5	12.8	12.8	12.5	6.5	12.5	12.8	10.4	3.6	2.7	0	6.5	12.8	6.5	6.2	6.5	12.8	6.5	1	2	2	2	1	2	2	2	1	1
EG10678	>EG10678 oppF Oligopeptide transport, ATP-binding protein	Peripheral inner membrane protein facing the cytoplasm	F1					1.46253	0.571785	0.719977	n.def	0.466615	n.def		n.def	n.def	n.def	n.def	0.459548	0.00679948		8.1	8.1	5.7	3	3	5.1	3	10.2	7.8	2.1	4.2	8.1	9.3	2.1	5.1	8.1	7.8	5.1	2	2	2	1	1	1	1	3	3	1
EG10680	>EG10680 osmC Lipoyl-dependent Cys-based peroxidase, hydroperoxide resistance	Cytoplasmic	A					n.def	n.def	n.def	n.def	n.def	n.def		n.def	n.def	n.def	n.def	n.def	n.def		0	0	14	0	0	0	0	13.3	0	27.3	20.3	14	14	27.3	14	0	14	14	0	0	1	0	0	0	0	1	0	2
EG10681	>EG10681 oxyR Oxidative and nitrosative stress transcriptional regulator	Nucleoid	N					2.25056	n.def	n.def	n.def	n.def	n.def		n.def	n.def	n.def	n.def	n.def	n.def		6.9	0	0	3.9	6.9	6.9	3	3	0	0	0	10.5	0	0	0	0	0	0	1	0	0	1	1	1	1	1	0	0
EG10683	>EG10683 pabB Sulfonamide resistance	Cytoplasmic	A					n.def	n.def	n.def	n.def	n.def	n.def		n.def	n.def	n.def	n.def	n.def	n.def		0	0	0	0	0	0	0	0	0	0	0	0	0	0	3.8	0	0	0	0	0	0	0	0	0	0	0	0	0
EG10684	>EG10684 pal Lipoprotein associated with peptidoglycan	Outer Membrane Lipoprotein	I		Yes	Yes		1.21957	n.def	2.12184	0.0125428	4.94847	0.000384889		0.995617	0.983615	0.972676	0.835965	0.968413	0.862116		8.1	38.2	16.8	21.4	16.8	16.8	38.2	23.7	25.4	15	17.3	17.3	32.4	23.7	23.7	23.7	24.3	23.7	1	4	2	2	2	2	4	3	3	2
EG10686	>EG10686 parC Topoisomerase IV, subunit A, ATP-dependent, type II	Nucleoid, Peripheral inner membrane protein facing the cytoplasm	N,F1					2.53701	n.def	0.419225	n.def	0.9463	0.834607		n.def	n.def	2.50341	0.459906	n.def	n.def		0	5.3	6.6	3.3	6.2	6.9	5.1	6.8	6.5	5.9	3.3	1.7	1.7	1.7	7	4.9	3.1	11.3	0	3	3	1	3	3	2	4	3	4
EG10687	>EG10687 parE Topoisomerase IV, subunit B, ATP-dependent, type II	Nucleoid	N		Yes	Yes		6.2131	n.def	3.33447	0.0401364	FtsH only	FtsH only		0.791217	0.495477	1.09286	0.707056	0.864692	0.545839		4.6	3.3	1.6	7.6	3.3	6.7	5.9	3.3	8.9	0	1.7	1.7	7.3	1.7	1.7	3.3	3.5	1.7	2	2	1	3	2	3	3	2	4	0
EG10688	>EG10688 pck Phosphoenolpyruvate carboxykinase [ATP]	Cytoplasmic	A					0.278446	0.221992	1.18808	0.770798	0.942409	0.621378		4.29204	0.181175	0.649412	0.14854	2.78731	0.248407		11.3	16.5	18.7	23.9	15.7	18.7	20	12.6	19.4	15.9	9.8	23.1	18.9	6.5	13.5	18	20.9	14.4	4	5	6	9	6	7	7	5	8	7
EG10689	>EG10689 pcm Protein-L-isoaspartate O-methyltransferase, SAM-dependent	Cytoplasmic	A					n.def	n.def	n.def	n.def	n.def	n.def		n.def	n.def	n.def	n.def	n.def	n.def		8.7	0	4.8	0	6.2	0	0	4.8	0	0	0	0	0	4.8	4.8	0	0	4.8	1	0	1	0	1	0	0	1	0	0
EG10690	>EG10690 pcnB Poly(A) polymerase	Peripheral inner membrane protein facing the cytoplasm	F1			Yes		1.2109	0.52968	0.555483	n.def	FtsH only	FtsH only		n.def	n.def	n.def	n.def	1.05748	0.925694		9.2	11	10.1	5.8	5.8	2.8	5.8	9.2	10.5	10.1	10.1	8.6	11.8	19.4	16.1	4.7	13.5	18.7	4	4	4	2	2	1	2	4	4	4
EG10691	>EG10691 pdxA 4-hydroxythreonine-4-phosphate dehydrogenase	Cytoplasmic	A					2.29102	n.def	1.34417	n.def	1.80376	n.def		n.def	n.def	n.def	n.def	n.def	n.def		10.9	0	6.7	6.7	6.7	6.7	10.9	6.7	6.7	0	13.4	6.7	13.1	6.7	17.3	6.7	13.1	6.7	2	0	1	1	1	1	2	1	1	0
EG10692	>EG10692 pdxB 2-hydroxyacid dehydrogenase involved in pyridoxine biosynthesis upstream of 4-phospho-hydroxy-threonine	Cytoplasmic	A					1.18718	0.571362	0.492771	0.142168	1.19884	0.575206		0.493861	0.12886	1.40094	0.391314	0.691867	0.388216		11.6	21.4	11.6	26.5	9.5	14.6	24.3	11.4	14.6	13.5	11.6	13.5	16.7	10.3	23	15.3	17.2	10.6	4	6	4	8	3	5	7	4	5	5
EG10693	>EG10693 pdxJ Pyridoxine 5-phosphate (PNP) synthase	Cytoplasmic	A			Yes		1.82864	0.0502041	1.80327	0.0163948	FtsH only	FtsH only		0.912716	0.633224	0.646476	0.115134	0.590049	0.099414		16	27.2	16	22.6	23	11.9	22.6	11.5	11.5	20.6	11.5	11.9	16	11.9	11.5	11.5	11.5	11.5	3	4	3	3	4	3	3	2	2	4
EG10694	>EG10694 pepA Multifunctional Aminopeptidase A	Peripheral inner membrane protein facing the cytoplasm	F1					1.15544	0.752034	1.13051	0.499331	0.696518	0.391086		0.968221	0.850378	0.483229	0.0946419	0.467873	0.0813789		10.7	15.9	15.9	18.7	20.7	21.3	13.9	14.9	15.9	9.1	9.1	18.7	17.1	10.7	11.7	15.9	11.5	14.1	5	7	6	6	7	6	5	7	6	4
EG10695	>EG10695 pepD Peptidase D, Xaa-His dipeptidase	Cytoplasmic	A		Yes			1.89169	0.0586586	2.03273	0.00679892	2.01632	0.214706		1.0778	0.544322	0.749476	0.0520877	0.807783	0.0655271		18.6	24.5	27.6	30.7	20.8	20	30.1	19.6	29.7	23.1	24.9	23.5	26.8	17.5	22.3	21	24.9	22.3	7	9	10	12	8	8	12	8	12	9
EG10696	>EG10696 pepN Aminopeptidase N	Peripheral inner membrane protein facing the cytoplasm	F1					2.26841	0.101226	2.2703	0.42299	1.43371	0.759812		0.53861	0.279442	0.932652	0.841898	0.502336	0.0356055		2.8	14.7	12.8	12.1	8.6	4.9	11.6	7.8	13.4	9.8	8.9	14	10.2	7	17.6	11.5	16.6	10.7	2	9	9	8	7	4	8	6	10	8
EG10697	>EG10697 pepP Proline aminopeptidase, homotetrameric	Cytoplasmic	A	Yes		Yes		2.48313	0.00722077	1.58678	0.0258215	2.98077	0.00331546		0.962482	0.844578	0.854427	0.462355	0.822371	0.338692		13.2	17	17	14.5	22.2	22.2	17.5	15.4	20	5	15	15	13.2	12.2	17	15	13.2	17	4	5	5	5	6	6	5	4	6	2
EG10698	>EG10698 pepQ Proline dipeptidase	Cytoplasmic	A	Yes	Yes	Yes		3.51813	0.00587105	2.71083	0.0477247	2.87593	0.00153826		0.630383	0.414777	0.974054	0.95085	0.614027	0.0384327		20.3	22.1	12.4	9.7	17.8	17.8	24.2	19.9	16.7	24.4	16.7	30.7	23	19.9	21	26.2	21	18.7	7	7	4	3	6	6	7	7	6	9
EG10699	>EG10699 pfkA 6-phosphofructokinase-1	Peripheral inner membrane protein facing the cytoplasm	F1	Yes	Yes	Yes		2.86747	0.0120357	3.85325	0.000589927	8.01339	0.00506293		1.04379	0.876971	0.669726	0.110426	0.699053	0.098914		13.8	16.9	8.4	24.7	16.2	19.7	16.2	19.1	17.2	19.1	13.8	21.2	13.8	13.8	16.2	21.6	11.2	10.9	4	5	2	6	5	5	5	6	4	6
EG10700	>EG10700 pfkB 6-phosphofructokinase-2	Cytoplasmic	A					2.03138	0.208616	1.06494	0.885852	3.50225	0.241562		1.05919	0.826981	0.933628	0.845086	0.988893	0.977101		21.4	13.6	21.4	26.2	26.2	18.8	26.2	23.6	21.4	12.9	22	26.9	23.6	24.6	23.6	22	22	22	4	2	4	5	5	3	5	4	4	3
EG10701;EG12758	>EG10701 pflB Formate acetyltransferase 1	Peripheral inner membrane protein facing the cytoplasm	F1		Yes	Yes		4.22417	0.0595314	4.6632	0.0129259	5.17325	0.00138658		0.891057	0.789205	0.929158	0.834063	0.827933	0.372691		22	35.8	37.9	34.2	39.3	27.5	40	32.4	38.3	27.1	41.3	34.1	24.7	30.1	43.7	28.8	43.6	38.6	12	23	22	20	23	17	24	19	22	17
EG10702	>EG10702 pgi Glucose-6-phosphate isomerase	Cytoplasmic	A					0.501976	0.203447	0.938467	0.531106	0.279727	0.538315		0.78504	0.559864	0.554155	0.416118	0.435033	0.343431		22.2	32.6	24.4	29.9	21.9	27	26.8	20	29.1	19.3	28.4	32.6	32.6	23.9	29.7	32.6	27	23.9	9	11	9	11	9	10	10	8	11	8
EG10703	>EG10703 pgk Phosphoglycerate kinase	Peripheral inner membrane protein facing the cytoplasm	F1					0.97726	0.592331	1.35119	0.691332	1.06016	0.630758		2.80486	0.0157776	0.63793	0.073032	1.7893	0.0679304		62.5	67.7	61.8	66.9	61.5	48.3	54.3	53.2	67.7	42.6	50.9	59.9	56.8	57.1	68.5	50.1	57.6	64.1	17	18	17	18	17	13	13	13	18	14
EG10706	>EG10706 pgsA Phosphatidylglycerophosphate synthase	Integral Inner Membrane	B					n.def	n.def	2.72952	n.def	n.def	n.def		n.def	n.def	n.def	n.def	n.def	n.def		0	0	0	6	0	6	0	6	6	6	0	0	6	6	0	0	0	0	0	0	0	1	0	1	0	1	1	1
EG10707	>EG10707 pheA Phenylalanine synthesis, bifunctional: chorismate mutase (N) and prephenate dehydratase (central)	Cytoplasmic	A	Yes	Yes	Yes		4.45054	0.0379381	3.03849	0.00600145	3.9282	0.00655754		0.470384	0.131806	0.967215	0.907249	0.454962	0.00556616		21.5	18.9	16.3	25.1	15.5	12.7	18.4	9.8	18.9	14.8	10.6	18.9	15.5	13.7	18.4	10.4	18.9	13.5	8	7	6	8	6	5	6	6	7	6
EG10709	>EG10709 pheS Phenylalanine--tRNA ligase, alpha-subunit	Peripheral inner membrane protein facing the cytoplasm	F1		Yes			2.55967	0.0548481	5.13965	0.000448738	2.92164	0.086594		0.95823	0.866469	0.586479	0.0534959	0.561981	0.0918401		33.9	33	26.6	26.9	17.1	28.1	30.3	24.5	25.7	31.2	37.9	30	29.4	18	30.6	32.7	32.7	33.6	11	10	7	8	5	7	9	6	7	8
EG10710	>EG10710 pheT Phenylalanine--tRNA ligase, beta-subunit	Peripheral inner membrane protein facing the cytoplasm	F1	Yes				5.47338	0.0395487	0.596262	0.799494	4.2746	0.119898		0.331822	0.39052	1.8793	0.534602	0.623591	0.0922589		13.3	24.8	28.6	25.7	23.9	24.3	26.4	16.5	26.7	25.4	25.3	26.4	22.4	21.8	28.3	22.6	27	23.5	9	15	17	15	14	14	16	10	16	16
EG10711	>EG10711 yjdM Function unknown	Cytoplasmic	A					0.0705711	n.def	n.def	n.def	4.8583	n.def		n.def	n.def	1.05352	0.943406	n.def	n.def		21.6	15.3	0	15.3	15.3	15.3	15.3	15.3	15.3	21.6	0	0	15.3	15.3	15.3	0	15.3	15.3	2	1	0	1	1	1	1	1	1	2
EG10719	>EG10719 phnJ Phosphoribosyl phosphonate carbon-phosphorus lyase	Cytoplasmic	A					n.def	n.def	n.def	n.def	n.def	n.def		n.def	n.def	n.def	n.def	n.def	n.def		0	0	0	0	0	5.7	5.7	5.7	0	0	0	0	0	0	0	5.7	0	0	0	0	0	0	0	1	1	1	0	0
EG10724	>EG10724 phnO Aminoalkylphosphonate N-acetyltransferase	Cytoplasmic	A					0.611395	n.def	2.13337	n.def	1.12048	n.def		n.def	n.def	n.def	n.def	n.def	n.def		15.3	17.4	22.2	15.3	9.7	9.7	9.7	9.7	9.7	0	0	9.7	15.3	15.3	9.7	9.7	0	9.7	2	2	3	2	1	1	1	1	1	0
EG10731	>EG10731 phoP Response regulator, two-component system	Nucleoid	N			Yes		2.18808	0.654708	1.83842	0.669781	3.10518	0.0239395		1.12666	0.811368	0.9687	0.901115	1.0914	0.856254		48.9	62.3	48.9	62.8	44.8	57.4	62.3	57.8	48.9	29.6	35.9	39.9	38.1	35.9	46.2	55.2	49.3	35.4	8	9	8	10	7	8	9	8	8	5
EG10734	>EG10734 pstS Periplasmic phosphate binding protein, high-affinity	Periplasmic	G					1.59548	0.0572746	0.854082	n.def	1.89106	0.592179		n.def	n.def	n.def	n.def	0.534317	0.159806		32.4	41.9	28.6	18.8	28	28	35	26.3	39	35.8	37.9	42.8	28	22.5	34.4	25.1	36.1	36.1	8	10	7	5	6	6	8	6	9	9
EG10735	>EG10735 phoU Negative regulator of pho regulon	Peripheral inner membrane protein facing the cytoplasm	F1					n.def	n.def	n.def	n.def	n.def	n.def		n.def	n.def	n.def	n.def	n.def	n.def		0	7.1	0	4.6	0	0	11.6	0	7.1	0	0	4.6	0	0	0	0	0	0	0	1	0	1	0	0	2	0	1	0
EG10740	>EG10740 plsB Glycerol-3-phosphate acyltransferase	Peripheral inner membrane protein facing the cytoplasm	F1					n.def	n.def	n.def	n.def	n.def	n.def		n.def	n.def	n.def	n.def	n.def	n.def		1.4	2.7	1.2	0	0	0	2.7	4.5	0	0	0	1.4	1.4	2.2	0	0	1.4	1.4	1	2	1	0	0	0	2	2	0	0
EG10741	>EG10741 pmbA Probable peptidase required for the maturation and secretion of the antibiotic peptide MccB17	Cytoplasmic	A					0.763986	0.402192	0.374562	0.0882567	0.911659	0.762628		0.908944	0.828099	0.805442	0.62037	0.732102	0.478537		9.1	8.7	13.8	14.9	11.3	11.3	6.2	14.2	8.7	14.9	17.1	16.4	19.6	11.3	22.7	15.1	19.8	12.9	3	3	5	4	4	3	2	5	3	6
EG10742	>EG10742 pncB Nicotinate phosphoribosyltransferase	Periplasmic	G					1.19257	n.def	0.783716	0.92405	1.16605	0.864452		n.def	n.def	0.413399	0.140714	n.def	n.def		10.8	10.2	12.2	10.2	10.2	11.2	11.2	14.5	14	14.2	10.2	10.2	7.5	15.2	10.2	7.8	10.5	10.8	3	3	4	3	3	3	3	4	4	4
EG10743	>EG10743 pnp Polynucleotide phosphorylase	Peripheral inner membrane protein facing the cytoplasm	F1	Yes				3.67936	0.0144924	1.77942	0.0976611	9.87597	0.0802981		0.654715	0.403538	0.895361	0.765683	0.586206	0.0442278		23.8	45.7	46.6	43.6	43.6	36.7	42.9	27.8	46.8	31.6	44.9	43.6	34.5	32.1	41.6	32.5	37.3	39.2	12	22	23	20	22	18	22	15	23	19
EG10744	>EG10744 pntA Proton-translocating NAD(P) transhydrogenase, alpha subunit	Integral Inner Membrane	B					8.12063	0.0755573	1.14385	0.738795	0.350986	n.def		0.648697	0.593017	0.3797	0.271348	0.246311	0.199519		5.7	15.5	19.6	6.9	15.3	14.1	5.9	7.8	8	15.5	5.7	16.1	6.9	6.5	13.3	11.4	9	3.5	2	6	6	2	5	4	2	3	3	5
EG10745	>EG10745 pntB Proton-translocating NAD(P) transhydrogenase, beta subunit	Integral Inner Membrane	B					1.23019	0.966649	1.44944	0.254302	1.7503	0.676679		1.23982	0.751487	0.516367	0.36398	0.640201	0.573522		11.5	18.8	16.9	19.3	14.1	10.6	16.7	7.1	10.2	12.6	15.4	26.8	21	9.7	14.1	14.1	21	11.5	5	6	5	6	4	3	5	3	4	5
EG10746	>EG10746 polA DNA polymerase I	Peripheral inner membrane protein facing the cytoplasm	F1					1.47328	0.404733	1.34239	0.641283	1.60911	0.555457		0.77901	0.300781	1.18786	0.407498	0.925354	0.623006		10.9	24.6	24.2	21.7	19.4	14.8	27	21.2	26.3	9.1	18.6	22.4	21	13.7	23.7	24	25.5	24	6	14	14	12	11	9	17	13	16	7
EG10748	>EG10748 mrcA Murein polymerase, PBP1A	Integral Inner Membrane	B					n.def	n.def	2.02886	n.def	n.def	n.def		n.def	n.def	n.def	n.def	n.def	n.def		0	6.8	2.8	0	6.6	5.6	0	1.9	2.8	1.9	4.4	4.1	0	1.9	3.2	0	1.5	3.8	0	3	1	0	2	3	0	1	1	1
EG10749	>EG10749 potA Spermidine/putrescine ABC transporter ATP-binding protein	Peripheral inner membrane protein facing the cytoplasm	F1					2.91406	n.def	3.16699	n.def	0.803214	n.def		n.def	n.def	n.def	n.def	n.def	n.def		3.2	3.7	8.5	4.8	3.2	0	4.8	0	3.7	4.8	3.2	3.2	0	3.2	7.1	7.9	8.5	4.8	1	1	2	1	1	0	1	0	1	1
EG10752	>EG10752 potD Spermidine ABC transporter periplasmic binding protein	Periplasmic	G					0.487752	0.40654	0.818774	0.296392	0.477201	0.070605		1.69	0.346183	0.552553	0.0431684	0.933816	0.872939		25.3	27	22.1	23	22.1	11.2	23.3	18.1	23.3	26.7	24.7	19	13.8	20.4	21.8	14.4	17	20.4	7	7	6	6	6	3	6	5	6	7
EG10755	>EG10755 ppa Inorganic pyrophosphatase	Cytoplasmic	A					1.7381	0.980192	2.31124	0.132795	0.700507	0.445072		0.979824	0.910941	0.506704	0.0946467	0.496481	0.101103		30.7	39.8	25.6	43.2	25.6	30.7	36.9	30.1	39.8	22.2	25.6	38.1	31.8	33.5	39.8	30.7	25.6	25.6	6	5	5	7	5	5	6	5	7	4
EG10756	>EG10756 ppc Phosphoenolpyruvate carboxylase	Peripheral inner membrane protein facing the cytoplasm	F1					13.1085	0.271833	0.38963	0.179229	0.396862	0.327368		0.335612	0.304023	0.491402	0.501265	0.164921	0.258485		11.3	29.7	30.9	24.9	26.2	21.3	29.7	18.6	25.1	19	26	31	25	22.5	29	22.7	27.9	24.7	8	22	22	18	19	15	20	15	18	15
EG10757	>EG10757 ppiA Peptidylprolyl-cis-trans-isomerase A, rotamase	Periplasmic	G		Yes	Yes		1.30943	n.def	FtsH only	FtsH only	FtsH only	FtsH only		n.def	n.def	0.726479	0.417055	n.def	n.def		14.7	40	14.7	41.1	14.7	28.4	42.1	14.7	28.4	14.7	14.7	28.4	14.7	14.7	42.1	14.7	28.4	14.7	2	4	2	5	2	3	4	2	3	2
EG10758	>EG10758 ppiB Periplasmic peptidylprolyl-cis-trans-isomerase B, rotamase	Peripheral inner membrane protein facing the cytoplasm	F1					0.672479	0.400127	1.51718	0.0103891	0.692257	0.263599		1.48853	0.320022	0.580237	0.115007	0.863698	0.693151		45.7	39	45.7	54.3	45.7	26.2	36.6	29.9	39	40.2	47.6	45.7	35.4	35.4	45.7	43.9	45.1	45.1	5	4	6	7	5	3	4	4	5	6
EG10759	>EG10759 ppsA Phosphoenolpyruvate synthase	Peripheral inner membrane protein facing the cytoplasm	F1	Yes	Yes	Yes		11.4451	0.0049005	5.88159	0.00876453	40.6885	0.0060618		0.665236	0.52709	1.4039	0.58633	0.933927	0.767707		20.6	25.8	30.1	23.2	26.8	24.5	26.8	25	28.7	24.4	19.3	25.9	21.2	22.3	22.3	26.1	25.5	24	13	18	17	13	15	14	16	15	17	16
EG10760	>EG10760 prc Periplasmic carboxy-terminal protease with specificity for non-polar C-termini	Peripheral inner membrane protein facing the periplasm	F2					n.def	n.def	n.def	n.def	n.def	n.def		n.def	n.def	n.def	n.def	n.def	n.def		1.6	13.8	6.7	7.2	7	1.3	9.4	1.3	10.4	0	2.8	8.9	5.9	1.3	8.5	6.7	9.1	2.6	1	7	4	3	3	1	4	1	5	0
EG10761	>EG10761 prfA Peptide chain release factor 1, RF-1	Cytoplasmic	A					1.52484	0.535503	1.42884	n.def	1.17401	n.def		n.def	n.def	n.def	n.def	n.def	n.def		5	4.2	12.2	8.1	6.4	4.7	15.6	0	11.1	5	11.7	9.4	14.4	2.2	12.2	4.2	9.2	14.4	2	2	4	2	2	1	4	0	4	2
EG10762	>EG10762 prfB Peptide chain release factor 2, RF-2	Cytoplasmic	A	Yes	Yes	Yes		2.39504	0.0010376	3.92001	0.0207386	3.51736	0.00849042		1.28277	0.171774	0.70504	0.0637701	0.904405	0.444683		16.2	35.6	25.8	23	18.1	9.9	15.1	15.1	20.8	11.5	23	26	14.5	15.9	13.4	9	18.4	17.5	4	8	6	6	5	3	4	4	6	3
EG10764	>EG10764 priB Primosomal protein n	Cytoplasmic	A					n.def	n.def	n.def	n.def	n.def	n.def		n.def	n.def	n.def	n.def	n.def	n.def		14.4	14.4	14.4	14.4	14.4	14.4	14.4	14.4	14.4	0	14.4	0	0	0	0	0	0	0	1	1	1	1	1	1	1	1	1	0
EG10766	>EG10766 secY SecYEG inner membrane translocon core subunit	Integral Inner Membrane	B					0.749001	0.353036	0.227241	0.137814	0.367767	0.105504		0.641428	0.529461	1.08554	0.896745	0.696293	0.323307		10.2	16.9	10.2	10.4	10.2	12.4	14.2	10.2	10.2	7.9	7.4	7.4	7.4	3.6	10.2	13.1	7.4	7.4	3	5	3	4	3	4	5	4	3	3
EG10767	>EG10767 proA gamma-Glutamyl phosphate reductase, proline biosynthesis	Peripheral inner membrane protein facing the cytoplasm	F1					1.25506	n.def	0.704643	0.298219	2.111	n.def		n.def	n.def	n.def	n.def	n.def	n.def		2.6	11.5	19.7	11.5	7.7	12.5	10.8	12.5	1.9	7.2	12.9	19.4	15.6	11.8	15.6	14.9	17.5	14.9	1	3	5	3	2	4	3	4	1	2
EG10768	>EG10768 proB Glutamate 5-kinase, proline biosynthesis	Cytoplasmic	A	Yes	Yes			2.92197	0.0132612	2.16529	0.0367743	1.25569	0.416649		0.947318	0.801598	0.804128	0.209809	0.761765	0.236586		28.6	26.7	21.3	28.1	27.5	21.8	26.2	26.2	37.6	21.3	13.9	21.5	20.7	26.7	17.4	21.5	21.5	20.2	7	6	5	7	7	5	6	7	9	6
EG10769	>EG10769 proC Pyrroline-5-carboxylate reductase, proline biosynthesis	Cytoplasmic	A			Yes		0.801816	n.def	0.0249938	n.def	FtsH only	FtsH only		n.def	n.def	0.131699	0.00343335	n.def	n.def		13.8	7.4	17.1	19	17.8	4.8	8.9	8.9	21.9	8.2	7.4	8.9	7.4	11.5	0	4.1	3.3	7.4	2	2	3	4	3	1	2	2	4	2
EG10770	>EG10770 proS Proline--tRNA ligase	Peripheral inner membrane protein facing the cytoplasm	F1					1.48315	0.799862	2.95543	0.494232	0.771075	0.226392		0.704923	0.127053	0.710633	0.214761	0.500942	0.0406954		22.2	38.6	32.5	31.8	28.3	27.4	32.2	29	31.6	27.1	30.8	35.1	33.4	32.3	43	33.4	26	31.6	9	16	13	12	11	11	12	12	12	11
EG10771	>EG10771 proV High-affinity transport for glycine	Peripheral inner membrane protein facing the cytoplasm	F1					1.86485	0.19223	0.551585	0.137442	1.76464	0.109313		1.18227	0.588394	0.886207	0.738459	1.04774	0.880091		25.8	29.2	32	31.2	22.8	18.2	25.5	27.5	27.5	12.8	24	28.8	19.5	19.8	24.2	23.2	19.8	19.8	7	7	8	8	5	5	6	7	7	4
EG10772	>EG10772 proW High-affinity transport for glycine, betaine, and proline	Integral Inner Membrane	B					1.29822	n.def	0.398661	n.def	0.179347	n.def		n.def	n.def	n.def	n.def	n.def	n.def		5.1	0	5.1	3.4	5.1	0	0	0	5.1	3.4	5.1	8.5	3.4	5.1	8.5	0	3.4	0	1	0	1	1	1	0	0	0	1	1
EG10773	>EG10773 proX High-affinity transport for glycine, betaine, and proline	Periplasmic	G					0.419915	n.def	5.42585	0.485616	0.664708	0.809911		n.def	n.def	0.813169	0.759628	n.def	n.def		30.3	37.3	43.3	32.1	37	17.3	32.1	10.3	32.1	24.2	43.3	38.2	32.1	31.5	43.3	43	27.3	32.1	7	8	10	7	8	4	6	3	7	5
EG10774	>EG10774 prs Phosphoribosylpyrophosphate synthase	Peripheral inner membrane protein facing the cytoplasm	F1		Yes	Yes		5.12294	0.181934	5.90813	4.37405e-05	7.11246	0.000774231		1.3391	0.00611105	0.799526	0.100738	1.07065	0.541932		44.1	39.4	40.6	44.4	44.4	40.6	44.4	34.6	44.4	40	32.4	40.3	44.1	32.1	40	32.1	40	36.2	10	10	10	12	11	11	12	10	12	10
EG10775	>EG10775 psd Phosphatidylserine decarboxylase, phospholipid biosynthesis	Peripheral inner membrane protein facing the cytoplasm	F1	Yes	Yes			FtsH only	FtsH only	FtsH only	FtsH only	1.03698	0.872484		0.824112	0.584729	0.526213	0.220569	0.433658	0.137175		15.5	15.2	14	10.9	14	10.9	12.4	15.2	2.8	0	11.2	11.2	8.1	8.1	14	11.2	10.9	11.2	3	4	3	2	3	2	2	3	1	0
EG10776	>EG10776 pspA Phage shock protein A, negative regulator of psp operon	Peripheral inner membrane protein facing the cytoplasm	F1					2.85976	0.106102	0.698026	0.306137	2.27989	0.114014		0.394103	0.0130102	1.17913	0.321922	0.464698	0.0592724		49.5	55.9	46.4	37.4	40.5	34.2	31.5	37.4	37.4	24.3	50	46.4	40.5	40.1	46.4	46.4	34.2	46.4	10	11	10	7	9	7	6	7	8	5
EG10778	>EG10778 pspC Positive regulatory gene, cooperatively with PspB	Integral Inner Membrane	B					n.def	n.def	n.def	n.def	n.def	n.def		n.def	n.def	n.def	n.def	n.def	n.def		8.4	8.4	0	8.4	8.4	8.4	0	0	0	6.7	0	0	0	0	0	0	0	0	1	1	0	1	1	1	0	0	0	1
EG10781	>EG10781 pssA Phosphatidylserine synthase	Peripheral inner membrane protein facing the cytoplasm	F1					1.13024	n.def	2.27069	0.882718	0.856503	0.579328		n.def	n.def	0.884249	0.659977	n.def	n.def		8	13.3	18.6	17.1	18.6	18.6	15.5	9.5	18.6	11.5	9.5	9.5	13.5	11.1	21.1	14	18	13.5	3	5	7	6	7	7	6	4	7	4
EG10783	>EG10783 pstB Phosphate transport, high-affinity, cytoplasmic ATP-binding protein	Peripheral inner membrane protein facing the cytoplasm	F1					0.672239	n.def	n.def	n.def	n.def	n.def		n.def	n.def	n.def	n.def	n.def	n.def		8.9	18.7	15.6	0	15.6	0	6.6	0	12.1	0	6.6	9.7	6.6	0	6.6	9.7	15.6	15.6	1	3	2	0	2	0	1	0	2	0
EG10785	>EG10785 pth Peptidyl-tRNA hydrolase	Cytoplasmic	A					0.596758	n.def	n.def	n.def	2.13838	n.def		n.def	n.def	n.def	n.def	n.def	n.def		19.1	26.8	8.2	21.6	16	8.2	16	8.2	7.7	13.9	21.1	21.1	13.4	21.1	16	16	23.7	16	3	4	1	3	2	1	2	1	1	2
EG10786	>EG10786 ptrA Protease III, periplasmic	Periplasmic	G					n.def	n.def	1.3848	n.def	n.def	n.def		n.def	n.def	n.def	n.def	n.def	n.def		0	0	0	0	0	1	0	0	0	0	0	1.4	2.5	0	0	0	0	0	0	0	0	0	0	1	0	0	0	0
EG10787	>EG10787 ptsG Glucose phophotransferase Enzyme IIBC(Glc)	Integral Inner Membrane	B					0.677509	n.def	0.292496	0.0928134	0.205852	0.0597921		n.def	n.def	0.541429	0.0395728	n.def	n.def		3.8	6.1	6.1	6.1	6.5	10.3	6.5	5.5	10.3	7.8	3.8	6.1	2.3	3.8	6.1	3.8	6.1	6.1	1	2	2	2	2	3	2	2	3	3
EG10788	>EG10788 ptsH PTS system histidine phosphocarrier protein Hpr	Peripheral inner membrane protein facing the cytoplasm	F1		Yes			2.64128	0.0710794	FtsH only	FtsH only	1.21881	0.771517		0.82107	0.300357	0.501824	0.110537	0.412032	0.0812361		62.4	63.5	70.6	47.1	47.1	47.1	62.4	47.1	47.1	47.1	42.4	47.1	47.1	47.1	62.4	42.4	47.1	47.1	3	3	4	2	2	2	3	2	2	2
EG10789	>EG10789 ptsI Phosphoenolpyruvate-protein phosphotransferase	Peripheral inner membrane protein facing the cytoplasm	F1	Yes	Yes	Yes		11.5232	0.0345228	13.2598	0.0355027	6.69903	0.0114952		1.28433	0.353233	0.768144	0.0442416	0.986547	0.952288		31.3	50.6	36.7	45	34.4	39.3	40	32.2	42.3	21	35	39.7	39.3	28.7	45.9	41	33.7	33.7	12	19	14	15	13	14	15	12	15	9
EG10790	>EG10790 purA Adenylosuccinate synthase, purine synthesis	Peripheral inner membrane protein facing the cytoplasm	F1					2.17049	0.981901	0.588742	0.22392	1.49758	0.593187		0.48646	0.140901	1.96569	0.193492	0.956231	0.937377		35	38	41.7	52.3	38.7	37.3	41.4	30.3	41.7	38.9	39.4	42.1	42.1	38.9	38.7	41.7	41.7	38.9	12	14	14	15	13	13	14	11	14	14
EG10791	>EG10791 purC Phosphoribosyl-aminoimidazole-succinocarboxamide synthase	Peripheral inner membrane protein facing the cytoplasm	F1					0.415362	0.127659	2.1709	0.369551	1.34313	0.998685		0.515025	0.145723	1.13546	0.753732	0.584789	0.203612		33.3	44.7	31.2	36.3	36.3	39.2	39.2	34.2	44.7	32.9	44.7	36.3	40.1	38	48.5	36.3	21.5	31.6	6	9	7	7	7	8	8	7	8	6
EG10792	>EG10792 purD Phosphoribosylamine-glycine ligase, purine synthesis	Cytoplasmic	A					0.60549	0.24682	0.122105	0.0100078	0.0700198	0.113459		0.440698	0.128919	0.706251	0.605751	0.311243	0.23236		20.5	16.8	20.3	14.2	18.4	21.7	15.2	16.8	13.5	15.4	17	20	15.2	15.9	17.9	13.5	13.8	10.3	7	5	6	4	6	6	4	5	4	5
EG10793	>EG10793 purE N5-carboxyaminoimidazole ribonucleotide (N-CAIR) mutase	Cytoplasmic	A	Yes				FtsH only	FtsH only	8.79993	0.414329	0.204135	0.510268		6.8844	0.051057	0.129182	0.314834	0.889338	0.897224		43.2	43.2	43.2	43.2	43.2	43.2	62.7	43.2	43.2	25.4	42.6	42.6	42.6	42.6	42.6	34.9	42.6	42.6	5	5	5	5	5	5	6	5	5	3
EG10794	>EG10794 purF Amidophosphoribosyltransferase, purine synthesis	Peripheral inner membrane protein facing the cytoplasm	F1		Yes			8.16798	0.26996	5.35161	0.0248299	1.89384	0.0522109		1.24512	0.610119	0.842321	0.604827	1.04879	0.904436		21.2	29.1	17	29.9	24.4	20.4	28.7	19.8	24.4	20	23	23.4	25.9	24.4	28.3	25.9	30.9	23.6	9	10	7	9	9	8	9	7	9	9
EG10795	>EG10795 purH Phosphoribosylaminoimidazolecarboxamide formyltransferase	Cytoplasmic	A					1.29167	0.514975	2.49611	0.662619	0.639819	0.152282		1.53606	0.40481	0.493547	0.130829	0.758119	0.567032		33.1	42.9	35.5	36.5	40.8	46.9	40.6	37.8	40.8	44	34.8	40.8	42	34.4	46.1	42.3	38.4	40.3	15	17	18	14	16	17	16	14	17	21
EG10796	>EG10796 purK N5-carboxyaminoimidazole ribonucleotide (N-CAIR) synthase	Cytoplasmic	A					1.5525	0.458045	1.63582	0.170705	2.07501	0.0706801		1.16351	0.697216	0.590889	0.105964	0.687503	0.329605		8.5	8.7	8.7	14.9	6.2	6.5	6.5	6.2	6.2	8.5	8.7	8.7	8.7	8.5	12.4	8.7	8.7	5.9	3	4	4	5	2	3	3	2	2	3
EG10797	>EG10797 purL Phosphoribosylformylglycinamide synthase	Cytoplasmic	A		Yes			0.884769	0.648873	11.1164	0.0218288	2.12262	0.244801		0.864947	0.541498	0.567265	0.163784	0.490655	0.130806		10.7	39.6	26.5	33.6	29.4	23.8	36.9	19.9	26.5	15.6	30.3	35.7	32.4	26	35.2	30.2	32	28.4	11	35	25	27	25	19	30	17	25	17
EG10798	>EG10798 purM Phosphoribosyl-aminoimidazole (AIR) synthase	Cytoplasmic	A					1.55642	0.378005	0.940124	0.795951	1.13415	0.981176		0.792502	0.238627	0.800402	0.396344	0.63432	0.14232		18	18	13.9	22.3	22.3	18.3	18	11.3	13.9	11	18	18	13.9	11	18	7	18	18	4	4	3	5	5	4	5	4	4	4
EG10799	>EG10799 purN Glycinamide ribonucleotide transformylase (GART) 1, purine synthesis	Cytoplasmic	A					0.75046	n.def	1.17282	n.def	0.977737	n.def		n.def	n.def	n.def	n.def	n.def	n.def		5.2	11.3	11.3	11.3	11.3	11.3	11.3	0	11.3	9.9	11.3	11.3	11.3	5.2	11.3	11.3	11.3	11.3	1	2	2	2	2	2	2	0	2	2
EG10800	>EG10800 purR Purine regulon repressor	Nucleoid	N					0.314431	0.31253	0.401867	0.123352	0.213636	0.0258416		1.43997	0.613205	0.434138	0.269909	0.625146	0.52995		20.2	19.1	20.8	20.2	11.7	15	11.1	20.5	7.3	20.5	24	24	18.5	18.8	24	15.2	24	24	6	7	6	7	5	5	3	5	2	5
EG10801	>EG10801 putA Proline dehydrogenase and repressor for the putAP divergon	Nucleoid, Peripheral inner membrane protein facing the cytoplasm	N,F1					1.3825	0.274295	0.910426	0.924286	1.94221	0.0470591		0.642021	0.551765	1.98924	0.399844	1.27713	0.430798		5.3	14.2	13.3	21.4	16.1	12.7	19.7	12.9	16.1	8.7	13.4	13.6	17.3	11.5	14.9	14.8	13.9	14.8	5	13	14	19	15	13	19	13	16	10
EG10803	>EG10803 pykA Pyruvate kinase II, minor	Peripheral inner membrane protein facing the cytoplasm	F1			Yes		2.52321	0.120533	1.20947	0.412173	2.96036	0.00804581		0.677951	0.644847	1.58366	0.608852	1.07364	0.8031		54.4	61	56.9	59.4	61	67.3	59.4	65.6	66.5	47.1	51.7	57.7	56	56.2	61.9	58.3	59.8	59	21	23	21	21	22	23	21	22	23	18
EG10804	>EG10804 pykF Pyruvate kinase I, fructose 1,6-bisphosphate-activated	Peripheral inner membrane protein facing the cytoplasm	F1					0.446838	0.0322418	0.202108	0.0984434	0.594355	0.14219		0.449963	0.460528	1.64341	0.594321	0.739473	0.074493		41.9	45.1	41.1	35.7	35.5	41.1	37.2	40.9	41.1	30	41.3	39.1	36	35.1	40.4	41.1	40	48.3	14	16	14	11	11	13	12	13	13	11
EG10805	>EG10805 pyrB Aspartate carbamoyltransferase, catalytic subunit	Cytoplasmic	A			Yes		1.99417	0.119115	1.27405	0.641989	2.26319	0.00681393		0.954786	0.874062	0.74977	0.290663	0.71587	0.0545524		9	12.5	14.8	26	6.8	12.5	13.8	9.3	6.8	15.8	3.2	9	6.8	11.6	6.8	12.5	12.5	6.8	2	3	4	4	2	3	3	2	2	4
EG10806	>EG10806 pyrC Dihydroorotase, the third step in pyrimidine biosynthesis	Cytoplasmic	A					0.831497	0.410486	0.65161	0.295201	1.13428	0.260381		0.919981	0.75131	1.00478	0.985715	0.924382	0.656323		19.3	15.2	15.2	14.7	15.2	15.5	12.4	12.1	12.6	9.2	8.6	15.5	16.1	6.6	18.1	16.4	12.6	23	6	5	5	5	5	5	4	4	4	3
EG10807	>EG10807 pyrD Dihydroorotate dehydrogenase, UMP biosynthesis	Peripheral inner membrane protein facing the cytoplasm	F1					1.04146	0.854496	0.77746	0.55018	4.44553	0.0505527		0.980742	0.961552	1.07255	0.857516	1.0519	0.833628		19.3	16.1	16.1	10.4	16.1	16.1	16.1	19.3	16.1	8.9	10.4	10.4	14.9	15.2	7.4	13.4	13.4	16.1	5	4	4	2	4	4	4	5	4	3
EG10808	>EG10808 pyrE Orotate phosphoribosyltransferase	Cytoplasmic	A					1.64658	0.530098	1.18274	0.694911	0.493216	0.631413		0.88013	0.765274	0.231905	0.466586	0.204106	0.452293		30.5	39.9	26.8	26.8	33.8	23.5	36.6	23.9	34.3	20.2	33.8	33.8	33.8	26.8	30.5	33.8	33.8	33.8	6	6	5	5	6	4	5	4	6	3
EG10809	>EG10809 pyrF Orotidine-5-phosphate decarboxylase	Cytoplasmic	A					n.def	n.def	2.87921	n.def	0.804655	n.def		n.def	n.def	n.def	n.def	n.def	n.def		10.2	0	4.9	23.7	4.9	0	5.3	5.3	6.5	18.8	0	6.9	11.8	18.8	6.9	6.9	5.3	0	2	0	1	4	1	0	1	1	1	3
EG10810	>EG10810 pyrG CTP synthase	Peripheral inner membrane protein facing the cytoplasm	F1					3.75646	0.0793361	2.83316	0.517799	2.75212	0.589445		0.936585	0.827718	0.714584	0.172959	0.669269	0.135143		28.1	38.5	27.7	22.4	31.4	20.9	33	24.6	24.6	15.8	29.7	27.2	25.7	32.8	27.7	24.2	27.5	27.5	12	18	12	10	14	10	12	11	9	9
EG10811	>EG10811 pyrI Aspartate carbamoyltransferase, regulatory subunit	Cytoplasmic	A					1.45382	0.325231	1.23244	0.433726	0.782827	0.447799		0.953449	0.851986	0.732725	0.166421	0.698615	0.206699		37.3	25.5	25.5	25.5	25.5	25.5	34.6	25.5	25.5	32	25.5	25.5	34.6	39.9	30.7	23.5	25.5	30.7	4	2	2	2	2	2	3	2	2	3
EG10812	>EG10812 queA S-adenosylmethionine:tRNA ribosyltransferase-isomerase	Cytoplasmic	A					0.955634	n.def	n.def	n.def	n.def	n.def		n.def	n.def	n.def	n.def	n.def	n.def		0	6.5	8.4	12.6	5.9	0	6.5	0	0	0	8.4	0	0	0	0	6.5	0	0	0	1	2	2	1	0	1	0	0	0
EG10815	>EG10815 rbsB D-ribose binding protein, periplasmic	Periplasmic	G					n.def	n.def	n.def	n.def	n.def	n.def		n.def	n.def	n.def	n.def	n.def	n.def		5.1	0	0	0	0	0	0	5.4	0	0	5.1	0	0	10.5	5.1	5.1	0	0	1	0	0	0	0	0	0	1	0	0
EG10823	>EG10823 recA General recombination and DNA repair	Peripheral inner membrane protein facing the cytoplasm	F1	Yes	Yes	Yes		4.97567	0.00683803	3.70837	0.00205175	6.36328	0.00013966		0.825422	0.587292	1.01442	0.961539	0.837328	0.200126		28.9	33.1	22.7	27.8	22.7	25.2	28.9	21.5	31.2	21	29.5	27.5	24.1	20.4	19.3	25.2	24.1	27.5	7	9	6	7	6	6	7	5	8	6
EG10830	>EG10830 recJ ssDNA 5-3 exonuclease involved in recombination	Integral Inner Membrane	B					n.def	n.def	n.def	n.def	n.def	n.def		n.def	n.def	n.def	n.def	n.def	n.def		0	0	0	0	0	0	0	2.3	0	0	0	0	0	0	0	0	0	0	0	0	0	0	0	0	0	1	0	0
EG10835	>EG10835 relA ATP:GTP 3-pyrophosphotransferase, ppGpp synthase I	Peripheral inner membrane protein facing the cytoplasm	F1					n.def	n.def	n.def	n.def	0.532926	n.def		n.def	n.def	n.def	n.def	0.85937	0.794038		2.6	5.1	2.6	2.6	2.6	4.7	2.6	5	2.6	2.2	4.8	4.7	4.7	3.6	4.8	4.8	4.7	4.7	1	2	1	1	1	2	1	3	1	1
EG10838	>EG10838 hldD ADP-L-glycero-D-manno-heptose-6-epimerase	Peripheral inner membrane protein facing the cytoplasm	F1					0.783162	0.671403	0.106444	0.168743	0.25236	0.0897556		0.105859	0.322415	3.78248	0.405987	0.40041	0.099575		40.6	36.8	40.3	49	43.5	33.2	42.6	27.1	37.1	38.4	46.1	48.7	49.7	47.1	46.1	29.4	37.4	38.4	11	9	12	12	11	8	12	7	10	10
EG10844	>EG10844 rhlB ATP-dependent RNA helicase	Nucleoid, Peripheral inner membrane protein facing the cytoplasm	N,F1					1.63224	0.0313281	1.86651	0.0891291	8.34071	0.0872564		0.649222	0.288712	1.09796	0.810171	0.712822	0.32937		13.8	24.9	11.4	10.5	10.9	16.4	15	15.2	25.9	7.6	14.7	13.3	9.7	17.8	15.2	20	16.4	17.3	5	8	4	4	4	6	6	6	8	3
EG10845	>EG10845 rho Transcription termination factor Rho	Peripheral inner membrane protein facing the cytoplasm	F1	Yes	Yes			8.82121	0.0356211	18.3581	0.000139054	16.024	0.173604		0.955939	0.888973	0.786919	0.357912	0.752247	0.0890833		57.8	52.5	53.7	56.3	52.3	48	56.6	44.4	54.7	41.8	45.8	48	48.7	49.4	56.8	54.9	56.6	50.4	22	21	20	22	21	18	22	16	21	16
EG10850	>EG10850 rimI Ribosomal protein S18 N-acetyltransferase	Cytoplasmic	A					n.def	n.def	n.def	n.def	n.def	n.def		n.def	n.def	n.def	n.def	n.def	n.def		0	0	0	14.2	0	0	0	0	0	0	0	0	0	0	0	0	0	0	0	0	0	1	0	0	0	0	0	0
EG10851	>EG10851 rimJ Ribosomal protein S5 N-acetyltransferase	Peripheral inner membrane protein facing the cytoplasm	F1					n.def	n.def	n.def	n.def	n.def	n.def		n.def	n.def	n.def	n.def	n.def	n.def		0	0	0	0	0	0	6.7	6.7	0	0	0	0	0	0	0	0	0	0	0	0	0	0	0	0	1	1	0	0
EG10854	>EG10854 rlpA Septal ring protein, suppressor of prc, minor lipoprotein	Outer Membrane Lipoprotein	I					n.def	n.def	n.def	n.def	n.def	n.def		n.def	n.def	n.def	n.def	n.def	n.def		0	0	2.5	0	2.5	4.1	0	4.1	3.9	0	4.1	0	6.6	4.1	0	0	0	0	0	0	1	0	1	1	0	1	1	0
EG10855	>EG10855 lptE LPS assembly OM complex LptDE, LPS-binding lipoprotein component	Outer Membrane Lipoprotein	I					n.def	n.def	n.def	n.def	n.def	n.def		n.def	n.def	n.def	n.def	n.def	n.def		9.3	0	0	0	0	6.2	0	7.8	0	0	0	0	0	0	0	15.5	0	0	1	0	0	0	0	1	0	1	0	0
EG10857	>EG10857 rnc RNase III		N, F1					10.4165	n.def	4.31752	n.def	2.38735	n.def		0.815217	0.54449	0.707125	0.202318	0.57646	0.139599		4	4	4	4	4	4	4	4	4	11.9	4	4	4	4	4	4	4	0	1	1	1	1	1	1	1	1	1	3
EG10859	>EG10859 rne RNase E	Peripheral inner membrane protein facing the cytoplasm	F1	Yes		Yes		4.79662	0.0450274	65.5435	0.190462	3.88507	0.00681294		0.689094	0.372108	0.927902	0.766294	0.639412	0.21839		8.8	27.1	25.4	29.1	22	19.5	26.1	20.5	25.5	15.6	18.6	23.7	19.8	20.4	19.7	21.3	21.5	21.5	6	19	19	19	15	13	17	15	17	12
EG10861	>EG10861 rnhB Degrades RNA of DNA-RNA hybrids	Cytoplasmic	A					n.def	n.def	n.def	n.def	n.def	n.def		n.def	n.def	0.690692	0.0676118	n.def	n.def		6.1	6.1	6.1	6.1	6.1	6.1	6.1	6.1	6.1	0	0	0	0	0	0	0	0	0	1	1	1	1	1	1	1	1	1	0
EG10862	>EG10862 rnpA RNase P, C5 protein component	Cytoplasmic	A					1.98809	n.def	4.01251	n.def	5.86468	n.def		n.def	n.def	n.def	n.def	0.774088	0.27948		9.2	9.2	9.2	9.2	9.2	0	9.2	9.2	9.2	9.2	0	0	0	0	9.2	9.2	0	0	1	1	1	1	1	0	1	1	1	1
EG10864	>EG10864 rplA 50S ribosomal subunit protein L1	Ribosomal	r	Yes	Yes	Yes		5.37005	0.00961937	12.949	0.0120645	9.28024	0.00034454		0.998529	0.994804	0.687662	0.0128717	0.68665	0.0721912		62.4	59.8	66.7	66.7	56	59.8	66.7	59.8	66.7	66.7	50.9	59.8	66.7	59.8	66.2	59.8	66.7	59.8	14	13	16	17	13	13	16	14	16	13
EG10865	>EG10865 rplB 50S ribosomal subunit protein L2	Ribosomal	r	Yes	Yes	Yes		2.40565	0.0302869	2.98584	0.0314906	5.07429	0.0088465		1.12333	0.792018	0.669027	0.246682	0.75154	0.314141		41	38.8	38.8	45.1	38.8	41.8	41.8	41.8	38.8	47.3	38.8	44.3	38.8	38.8	41.8	41.8	38.8	38.8	8	8	8	9	8	10	9	10	8	10
EG10866	>EG10866 rplC 50S ribosomal subunit protein L3	Ribosomal	r		Yes	Yes		4.056	0.06184	3.95874	0.000582949	2.86874	0.00138397		1.13513	0.528743	0.581613	0.0458479	0.660208	0.0443859		39.7	43.1	34	37.3	42.1	38.8	33.5	38.8	42.1	22	34	38.8	44	31.6	38.8	33.5	38.8	33.5	7	7	4	5	6	5	4	5	6	4
EG10867	>EG10867 rplD 50S ribosomal subunit protein L4	Ribosomal	r	Yes	Yes	Yes		5.86669	0.011257	4.72992	0.00778392	4.04077	0.001076		0.901911	0.691592	0.680024	0.0167076	0.613321	0.0839501		46.3	46.3	46.3	39.8	44.3	39.8	32.3	39.8	39.8	47.8	54.7	40.3	36.3	56.7	36.3	44.3	40.8	36.3	9	8	8	6	7	6	4	6	6	9
EG10868	>EG10868 rplE 50S ribosomal subunit protein L5	Ribosomal	r	Yes				3.16113	0.0198305	3.79144	0.559026	4.61457	0.0891571		0.938309	0.788992	0.661315	0.0206765	0.620518	0.0631894		60.9	64.8	64.8	64.8	64.8	54.7	64.8	52	64.8	64.2	65.9	64.8	60.9	64.8	64.8	60.9	64.8	64.8	12	13	16	15	14	11	14	10	13	13
EG10869	>EG10869 rplF 50S ribosomal subunit protein L6	Ribosomal	r	Yes	Yes	Yes		3.3392	0.0190731	6.88654	0.00502488	8.10101	0.00194776		0.799994	0.572704	0.812152	0.467608	0.649716	0.0935255		54.2	49.2	49.2	46.9	49.2	52	40.1	51.4	46.9	52	49.2	52	52	52	54.2	49.2	45.8	46.9	10	9	9	8	9	10	7	8	8	9
EG10870	>EG10870 rplI 50S ribosomal subunit protein L9	Ribosomal	r	Yes	Yes			3.74089	0.0425549	2.18811	0.019711	2.33957	0.442546		0.77636	0.473337	0.846648	0.636743	0.657304	0.215565		87.2	75.2	75.2	71.1	65.8	70.5	58.4	60.4	65.8	79.2	67.8	65.8	71.1	79.2	71.1	65.8	60.4	61.1	13	12	11	11	10	10	9	9	10	12
EG10871	>EG10871 rplJ 50S ribosomal subunit protein L10	Ribosomal	r	Yes	Yes	Yes		3.7258	0.0171882	4.78994	0.0010936	6.20382	0.000340401		1.09025	0.753184	0.606224	0.00983138	0.660937	0.0997983		60	60	60	44.2	55.8	44.2	48.5	46.7	44.2	44.2	60	60	55.8	44.2	55.8	55.8	60	37	10	9	8	5	7	5	6	7	5	5
EG10872	>EG10872 rplK 50S ribosomal subunit protein L11	Ribosomal	r	Yes	Yes	Yes		2.41474	0.0380993	3.98046	0.000258571	5.47993	0.00620477		0.980432	0.95071	0.76219	0.113282	0.747276	0.279149		43.7	38.7	43.7	38	38	38	38	38	38	38.7	38.7	33.1	36.6	38	38	38.7	26.1	38	6	6	6	5	5	5	5	5	5	5
EG10873	>EG10873 rplL 50S ribosomal subunit protein L7/L12	Ribosomal	r	Yes	Yes	Yes		2.52942	0.0112553	4.54242	0.000860997	5.0659	0.000217955		1.18329	0.477049	0.612507	0.00133967	0.724773	0.120548		47.1	47.1	44.6	44.6	44.6	44.6	44.6	43.8	44.6	54.5	51.2	44.6	44.6	44.6	44.6	44.6	44.6	44.6	6	7	5	5	5	5	6	4	5	7
EG10874	>EG10874 rplM 50S ribosomal subunit protein L13	Ribosomal	r	Yes	Yes	Yes		4.94951	0.00530324	5.61249	0.00124774	6.98288	0.000976957		0.934894	0.733812	0.685623	0.0255959	0.640985	0.0280576		55.6	64.8	63.4	64.8	64.8	62.7	63.4	63.4	54.2	67.6	63.4	64.8	64.1	64.8	63.4	64.8	64.1	54.2	8	10	9	10	10	7	8	8	7	8
EG10875	>EG10875 rplN 50S ribosomal subunit protein L14	Ribosomal	r	Yes	Yes	Yes		9.15395	0.0433611	2.53377	0.0382086	3.76669	0.00747657		0.506948	0.176903	0.659682	0.162679	0.334425	0.000855671		35	35	35	35	35	35	35	41.5	35	34.1	35	35	35	35	35	35	35	35	5	5	5	5	5	5	5	5	5	4
EG10876	>EG10876 rplO 50S ribosomal subunit protein L15	Ribosomal	r		Yes			7.54138	0.200374	2.73797	0.0272725	4.30669	0.121033		1.69121	0.177915	0.444561	0.0130815	0.751846	0.284768		44.4	44.4	44.4	35.4	35.4	35.4	42.4	43.8	44.4	25	34.7	43.8	42.4	34.7	25	34.7	35.4	34.7	6	6	7	5	5	5	5	6	7	3
EG10877	>EG10877 rplP 50S ribosomal subunit protein L16	Ribosomal	r					1.79106	0.558786	3.37921	0.0760978	0.970522	0.601157		1.36474	0.311751	0.316658	0.0113544	0.432155	0.026094		22.1	33.8	33.8	20.6	32.4	39.7	39.7	39.7	39.7	32.4	32.4	32.4	39.7	32.4	33.8	32.4	39.7	32.4	2	4	4	2	3	4	4	4	4	3
EG10878	>EG10878 rplQ 50S ribosomal subunit protein L17	Ribosomal	r					1.18263	0.87193	1.24761	0.39444	1.39837	0.558787		1.27808	0.485416	0.489479	0.204801	0.625595	0.334965		26.8	20.5	26.8	26.8	20.5	26.8	26.8	20.5	20.5	26.8	20.5	20.5	26.8	20.5	20.5	20.5	20.5	20.5	4	3	4	4	3	4	4	3	3	4
EG10879	>EG10879 rplR 50S ribosomal subunit protein L18	Ribosomal	r					0.469045	0.216096	0.487682	n.def	0.470615	n.def		1.09259	0.787327	n.def	n.def	n.def	n.def		37.6	27.4	27.4	19.7	19.7	19.7	27.4	17.9	27.4	15.4	35	35	29.9	27.4	19.7	27.4	37.6	19.7	3	2	2	1	1	1	2	2	2	3
EG10880	>EG10880 rplS 50S ribosomal subunit protein L19	Ribosomal	r			Yes		1.80866	0.0769941	1.68963	0.265228	2.55472	0.000896243		0.941368	0.896086	0.748943	0.439367	0.70503	0.269793		50.4	53	51.3	51.3	51.3	44.3	44.3	44.3	44.3	44.3	53	44.3	51.3	44.3	51.3	51.3	51.3	51.3	5	7	5	5	5	4	4	4	4	4
EG10881	>EG10881 rplT 50S ribosomal subunit protein L20	Ribosomal	r			Yes		1.43817	0.557234	2.70303	0.0578547	3.92081	0.0291418		1.37533	0.395503	0.675863	0.353161	0.929535	0.801249		22.9	23.7	22.9	22.9	22.9	15.3	15.3	22.9	23.7	22.9	22.9	15.3	15.3	15.3	16.1	22.9	22.9	16.1	4	5	3	3	3	2	2	3	4	3
EG10882	>EG10882 rplV 50S ribosomal subunit protein L22	Ribosomal	r	Yes		Yes		2.32235	0.0159205	2.93586	0.303507	3.25039	0.0296871		1.26483	0.380279	0.548162	0.0158958	0.693332	0.0625704		63.6	63.6	62.7	63.6	63.6	62.7	62.7	60.9	63.6	59.1	63.6	62.7	63.6	62.7	63.6	63.6	62.7	63.6	11	13	10	11	11	10	10	10	11	8
EG10883	>EG10883 rplW 50S ribosomal subunit protein L23	Ribosomal	r					n.def	n.def	0.761439	n.def	n.def	n.def		n.def	n.def	n.def	n.def	n.def	n.def		28	27	27	27	12	15	27	37	27	0	0	27	43	33	27	27	27	27	3	2	2	2	1	1	2	3	2	0
EG10884	>EG10884 rplX 50S ribosomal subunit protein L24	Ribosomal	r					1.47447	0.575591	0.644775	0.226138	1.15044	0.607266		0.987146	0.982473	0.896568	0.678359	0.885044	0.819143		74	67.3	57.7	39.4	28.8	53.8	53.8	63.5	55.8	36.5	68.3	57.7	38.5	65.4	57.7	57.7	75	40.4	11	10	9	7	5	6	6	7	7	5
EG10885	>EG10885 rplY 50S ribosomal subunit protein L25	Ribosomal	r					1.30555	0.976711	0.610323	0.722481	0.602101	0.307884		0.481901	0.475825	0.383317	0.107082	0.184721	0.0103876		69.1	69.1	70.2	68.1	69.1	68.1	60.6	68.1	69.1	52.1	70.2	62.8	68.1	51.1	69.1	62.8	61.7	69.1	8	8	9	7	8	7	6	7	8	6
EG10886	>EG10886 rpmB 50S ribosomal subunit protein L28	Ribosomal	r		Yes	Yes		2.73067	0.181605	2.86676	0.0185575	3.81173	0.00574622		1.22781	0.66458	0.903957	0.710168	1.10988	0.782583		34.6	34.6	34.6	34.6	34.6	24.4	34.6	24.4	34.6	34.6	34.6	34.6	34.6	34.6	34.6	34.6	34.6	34.6	4	4	4	4	4	2	4	2	4	4
EG10887	>EG10887 rpmC 50S ribosomal subunit protein L29	Ribosomal	r					n.def	n.def	n.def	n.def	n.def	n.def		n.def	n.def	n.def	n.def	n.def	n.def		46	46	46	23.8	46	23.8	46	23.8	46	23.8	23.8	23.8	46	23.8	23.8	23.8	46	46	2	2	2	1	2	1	2	1	2	1
EG10888	>EG10888 rpmD 50S ribosomal subunit protein L30	Ribosomal	r					1.01595	0.932252	0.342735	0.0147933	1.30958	0.707203		1.02386	0.947057	0.52594	0.108981	0.538488	0.142628		57.6	59.3	57.6	57.6	57.6	57.6	57.6	33.9	33.9	33.9	59.3	57.6	57.6	57.6	57.6	57.6	57.6	39	3	4	3	3	3	3	3	2	2	2
EG10889	>EG10889 rpmE 50S ribosomal subunit protein L31	Ribosomal	r	Yes	Yes	Yes		FtsH only	FtsH only	FtsH only	FtsH only	3.5045	0.00503396		1.43391	0.34095	0.417355	0.02782	0.598452	0.00453128		11.4	11.4	11.4	11.4	11.4	11.4	11.4	11.4	11.4	10	10	10	10	10	10	11.4	11.4	11.4	2	2	2	2	2	2	2	2	2	1
EG10890	>EG10890 rpmF 50S ribosomal subunit protein L32	Ribosomal	r					3.30241	0.162832	1.11794	0.875561	0.921195	0.878572		0.586476	0.0297087	1.00057	0.999017	0.586808	0.39862		52.6	45.6	45.6	45.6	43.9	43.9	43.9	52.6	43.9	43.9	54.4	26.3	54.4	43.9	43.9	49.1	45.6	45.6	3	3	3	3	2	2	2	2	2	2
EG10891	>EG10891 rpmG 50S ribosomal subunit protein L33	Ribosomal	r					1.89913	n.def	2.11044	n.def	1.54237	n.def		n.def	n.def	n.def	n.def	n.def	n.def		40	0	27.3	27.3	27.3	27.3	0	27.3	27.3	27.3	27.3	27.3	0	27.3	27.3	27.3	27.3	27.3	2	0	1	1	1	1	0	1	1	1
EG10892	>EG10892 rpmH 50S ribosomal subunit protein L34	Ribosomal	r					0.476999	n.def	0.938656	n.def	n.def	n.def		n.def	n.def	n.def	n.def	n.def	n.def		17.4	19.6	19.6	17.4	17.4	17.4	17.4	0	17.4	17.4	17.4	0	17.4	0	0	0	0	0	1	1	1	1	1	1	1	0	1	1
EG10893	>EG10893 rpoA RNA polymerase, alpha subunit	Peripheral inner membrane protein facing the cytoplasm	F1	Yes	Yes	Yes		3.82266	0.00610344	5.03966	0.000198669	4.74946	9.08345e-05		1.04594	0.740643	0.702774	0.0124766	0.735063	0.011774		49.2	63.2	57.8	50.8	52	48	52	45.3	45.3	31.3	46.5	52	55.6	50.8	52.3	45.3	35.6	45.3	14	17	15	15	14	13	15	14	14	10
EG10894	>EG10894 rpoB RNA polymerase, beta subunit	Peripheral inner membrane protein facing the cytoplasm	F1					6.2843	0.196151	8.0445	0.0978817	11.106	0.0969092		0.426315	0.32793	1.26331	0.702956	0.538567	0.0254352		31.1	54	49	48.3	48.8	42.4	51	39.9	47.8	35.4	44.2	47.6	48	40.4	46.3	43.9	45	42.7	31	53	50	48	49	42	52	39	50	39
EG10895	>EG10895 rpoC RNA polymerase, beta subunit	Peripheral inner membrane protein facing the cytoplasm	F1			Yes		5.50428	0.136548	2.89768	0.3184	18.1935	0.00353633		0.757719	0.71518	1.34634	0.672509	1.02014	0.961989		20.8	48	46.6	40.6	42.9	39.5	41.5	30.3	43.3	32.2	44.1	45	39.9	39.2	45.6	41.1	46.8	42.3	21	50	49	42	44	41	41	35	43	38
EG10896	>EG10896 rpoD RNA polymerase subunit, sigma 70, initiates transcription	Nucleoid, Peripheral inner membrane protein facing the cytoplasm	N,F1	Yes		Yes		3.00215	0.010794	1.57868	0.180144	2.16932	0.00771941		0.897404	0.506215	0.774057	0.161622	0.694642	0.0753185		9	24	14.4	9.5	14.8	16	15.8	16	14.8	12.7	16	13.2	22.3	14.8	17.3	9	10.6	12.7	5	10	8	5	8	9	8	8	8	7
EG10898	>EG10898 rpoN RNA polymerase subunit, sigma 54	Nucleoid	N					n.def	n.def	n.def	n.def	n.def	n.def		n.def	n.def	n.def	n.def	n.def	n.def		0	0	0	0	3.6	10.5	6.1	3.6	0	3.6	4.4	0	0	2.9	0	0	3.6	4.4	0	0	0	0	1	3	2	1	0	1
EG10899	>EG10899 rpoZ RNA polymerase subunit, omega subunit	Peripheral inner membrane protein facing the cytoplasm	F1					0.479194	0.0444414	0.697409	0.502538	0.443795	0.0684976		1.36297	0.538176	0.519374	0.141535	0.707892	0.150544		60.4	67	59.3	59.3	33	70.3	61.5	78	51.6	52.7	26.4	42.9	61.5	33	9.9	40.7	59.3	42.9	5	5	4	5	2	4	5	6	4	4
EG10900	>EG10900 rpsA 30S ribosomal subunit protein S1	Ribosomal	r	Yes	Yes			3.8959	0.0105348	4.62455	0.00127651	190.691	0.128688		0.829526	0.480396	0.755543	0.202681	0.626743	0.00662997		50.8	59.1	53.5	47.6	48.7	48.7	53.7	47	50.6	41.1	51.5	58.5	53.1	54.6	58	50.4	59.1	54.6	23	36	31	29	27	24	29	24	25	25
EG10901	>EG10901 rpsB 30S ribosomal subunit protein S2	Ribosomal	r	Yes	Yes	Yes		6.37795	0.0160036	2.54779	0.0136613	3.85958	0.00950567		0.684611	0.0230783	0.758348	0.0644788	0.519174	0.00324827		71.4	56.4	68.5	65.6	61.4	40.7	65.6	62.7	44.8	42.3	44.8	45.2	60.2	62.7	50.2	60.2	53.9	46.1	17	17	14	12	11	9	12	13	10	10
EG10902	>EG10902 rpsC 30S ribosomal subunit protein S3	Ribosomal	r		Yes	Yes		3.41716	0.122708	6.49973	0.0145383	6.74113	0.00179644		1.21334	0.780961	0.974068	0.970297	1.18188	0.707214		49.4	56.2	49.4	55.4	48.1	42.1	48.5	42.1	42.5	48.9	54.9	55.4	42.5	48.1	48.5	48.5	55.4	42.5	11	12	12	12	10	9	11	9	10	11
EG10903	>EG10903 rpsD 30S ribosomal subunit protein S4	Ribosomal	r	Yes	Yes	Yes		9.51515	0.0329751	4.52876	0.0297848	7.43707	0.0325069		0.605213	0.494841	0.636659	0.353415	0.385314	0.00257733		49	54.4	48.1	43.7	43.7	39.3	48.1	47.1	48.1	38.3	51.5	39.3	39.3	39.8	51	48.1	39.3	39.3	12	13	11	10	9	10	10	10	10	8
EG10904	>EG10904 rpsE 30S ribosomal subunit protein S5	Ribosomal	r	Yes	Yes	Yes		8.37241	0.0160465	8.33408	9.667e-05	11.4655	0.000512535		0.888128	0.540601	0.797312	0.187778	0.708115	0.0143056		52.7	52.1	52.1	52.1	62.9	62.3	52.1	67.7	62.3	38.9	51.5	47.3	52.1	51.5	52.1	51.5	51.5	51.5	7	7	7	7	8	7	7	8	7	5
EG10905	>EG10905 rpsF 30S ribosomal subunit protein S6	Ribosomal	r			Yes		2.53735	0.0617318	2.57007	0.067528	3.56363	0.000292569		0.956254	0.718856	0.581712	0.000428062	0.556264	0.00192519		37.8	38.5	37	63	20	45.2	53.3	37	37	28.9	29.6	37	45.2	37	46.7	45.2	45.2	53.3	5	6	5	7	4	6	5	5	5	5
EG10906	>EG10906 rpsG 30S ribosomal subunit protein S7, mutated stop codon	Ribosomal	r					4.12221	0.254065	1.86867	0.961195	2.0792	0.468844		1.19474	0.322328	0.582861	0.0217874	0.696365	0.0153138		52	52	49.7	51.4	46.4	46.4	50.8	46.4	50.8	39.1	54.2	49.7	46.4	51.4	54.2	49.2	49.7	50.8	13	11	11	12	9	9	10	8	10	8
EG10907	>EG10907 rpsH 30S ribosomal subunit protein S8	Ribosomal	r					2.21425	0.36833	3.36091	0.570062	0.48301	0.0116015		0.750908	0.456155	0.931564	0.798214	0.699519	0.108442		36.9	50	43.1	50	43.1	32.3	50	50	50	43.1	50	50	50	50	43.1	43.1	50	50	4	7	5	8	5	4	6	6	6	5
EG10908	>EG10908 rpsI 30S ribosomal subunit protein S9	Ribosomal	r			Yes		2.76851	0.0803781	2.01457	0.114349	2.59592	0.0207303		0.715441	0.194811	0.685046	0.10954	0.49011	0.0141901		31.5	38.5	38.5	28.5	28.5	28.5	31.5	28.5	28.5	38.5	30	28.5	28.5	35.4	28.5	31.5	31.5	28.5	5	7	6	4	4	4	5	4	4	5
EG10909	>EG10909 rpsJ 30S ribosomal subunit protein S10	Ribosomal	r	Yes	Yes	Yes		3.61517	0.00637202	4.42874	0.000628871	5.44983	0.00132611		0.827355	0.467147	0.756375	0.0839346	0.625791	0.0616447		64.1	59.2	57.3	56.3	57.3	56.3	56.3	57.3	43.7	48.5	45.6	43.7	42.7	43.7	43.7	43.7	42.7	42.7	8	8	7	6	7	6	6	7	6	5
EG10910	>EG10910 rpsK 30S ribosomal subunit protein S11	Ribosomal	r	Yes	Yes	Yes		7.18429	0.00524619	3.64792	0.00487173	5.32335	0.00657378		0.751548	0.404824	0.620905	0.0597171	0.46664	0.023448		27.9	45.7	34.1	52.7	27.9	22.5	45.7	16.3	27.9	34.1	34.1	34.1	51.9	34.1	34.1	28.7	34.1	51.9	4	5	5	7	4	3	5	3	4	5
EG10911	>EG10911 rpsL 30S ribosomal subunit protein S12	Ribosomal	r					1.61577	0.269014	2.81422	n.def	n.def	n.def		n.def	n.def	n.def	n.def	n.def	n.def		6.5	21.8	6.5	21.8	6.5	0	21.8	6.5	6.5	6.5	6.5	6.5	0	28.2	21.8	6.5	6.5	6.5	1	1	1	1	1	0	1	1	1	1
EG10912	>EG10912 rpsM 30S ribosomal subunit protein S13	Ribosomal	r	Yes	Yes	Yes		3.17138	0.0479328	2.28477	0.00188847	3.21884	0.00573804		0.716692	0.255336	0.764654	0.209202	0.548021	0.0342856		61	61	60.2	60.2	60.2	54.2	54.2	53.4	54.2	53.4	54.2	60.2	59.3	60.2	54.2	54.2	60.2	60.2	9	9	8	8	8	7	7	6	7	6
EG10913	>EG10913 rpsN 30S ribosomal subunit protein S14	Ribosomal	r					1.40213	0.769987	0.781115	n.def	0.375548	0.167242		n.def	n.def	n.def	n.def	0.372358	0.00514409		41.6	28.7	28.7	18.8	28.7	12.9	12.9	12.9	38.6	18.8	38.6	28.7	18.8	18.8	28.7	28.7	28.7	28.7	4	2	2	1	2	1	1	1	3	1
EG10914	>EG10914 rpsO 30S ribosomal subunit protein S15	Ribosomal	r	Yes	Yes	Yes		3.14954	0.0188319	4.2161	0.00648166	4.92319	0.000318718		0.805099	0.55219	0.854695	0.507998	0.688114	0.12744		69.7	58.4	58.4	58.4	58.4	68.5	59.6	58.4	58.4	57.3	58.4	24.7	16.9	58.4	58.4	16.9	16.9	16.9	7	6	6	5	6	6	6	5	5	4
EG10915	>EG10915 rpsP 30S ribosomal subunit protein S16	Ribosomal	r					1.84618	0.423855	1.28956	0.717262	2.07018	0.642781		0.58108	0.167761	0.865478	0.507629	0.502912	0.069851		57.3	52.4	52.4	52.4	51.2	51.2	52.4	45.1	51.2	52.4	52.4	52.4	52.4	52.4	52.4	52.4	52.4	51.2	4	5	5	5	4	4	5	3	4	5
EG10916	>EG10916 rpsQ 30S ribosomal subunit protein S17	Ribosomal	r					4.24624	0.0555387	2.97957	0.00557465	3.35077	0.000581745		0.619171	0.264964	0.508296	0.00692764	0.314722	0.0039854		20.2	9.5	9.5	9.5	9.5	9.5	9.5	9.5	9.5	9.5	9.5	9.5	20.2	9.5	9.5	9.5	20.2	9.5	2	1	1	1	1	1	1	1	1	1
EG10917	>EG10917 rpsR 30S ribosomal subunit protein S18	Ribosomal	r					1.14031	0.898593	1.13894	0.788709	1.43853	0.313332		0.794839	0.466157	0.655526	0.0639082	0.521037	0.0106865		40	40	40	37.3	24	37.3	24	29.3	24	29.3	40	40	37.3	24	40	40	37.3	37.3	4	2	4	3	2	3	2	2	2	2
EG10918	>EG10918 rpsS 30S ribosomal subunit protein S19	Ribosomal	r					1.37571	0.833031	1.84483	n.def	2.35837	0.0544828		n.def	n.def	n.def	n.def	0.83731	0.554545		19.6	20.7	19.6	47.8	19.6	19.6	56.5	19.6	20.7	19.6	35.9	37	37	19.6	20.7	19.6	20.7	19.6	2	3	2	4	2	2	5	2	3	2
EG10919	>EG10919 rpsT 30S ribosomal subunit protein S20	Ribosomal	r					0.421185	0.0408251	0.196484	0.000650595	0.0783287	n.def		0.918904	0.647749	n.def	n.def	n.def	n.def		12.6	12.6	25.3	12.6	12.6	12.6	0	12.6	12.6	12.6	12.6	12.6	12.6	12.6	12.6	12.6	12.6	12.6	1	1	2	1	1	1	0	1	1	1
EG10920	>EG10920 rpsU 30S ribosomal subunit protein S21	Ribosomal	r					0.815287	0.557252	1.19893	0.924214	0.802876	0.476481		1.33702	0.205907	0.252067	0.161255	0.337018	0.203913		42.3	43.7	43.7	42.3	43.7	43.7	42.3	42.3	43.7	42.3	42.3	25.4	43.7	42.3	42.3	43.7	25.4	43.7	3	5	5	4	5	5	4	4	5	4
EG10921	>EG10921 ftnA Ferritin, major cytoplasmic iron storage protein	Cytoplasmic	A					2.16869	0.374812	1.64262	0.529274	1.07262	0.861906		0.630583	0.631003	0.580696	0.398299	0.366177	0.0216136		17	18.2	38.8	38.2	25.5	25.5	33.3	20	25.5	0	19.4	27.9	20	11.5	0	11.5	20	20	2	3	5	5	2	2	4	2	3	0
EG10922	>EG10922 coaA Pantothenate kinase	Cytoplasmic	A					n.def	n.def	n.def	n.def	n.def	n.def		n.def	n.def	n.def	n.def	n.def	n.def		7.6	12.3	0	7.6	7.6	0	0	4.4	5.4	0	0	0	4.4	0	0	4.4	0	0	1	2	0	1	1	0	0	1	1	0
EG10923	>EG10923 ruvA Holliday junction recognition factor, recruits RuvB	Nucleoid	N					n.def	n.def	0.582978	n.def	n.def	n.def		n.def	n.def	n.def	n.def	n.def	n.def		22.2	0	6.4	9.9	5.9	5.9	0	0	6.4	5.9	6.4	6.4	6.4	12.3	6.4	6.4	6.4	6.4	3	0	1	1	1	1	0	0	1	1
EG10924	>EG10924 ruvB DNA helicase driving branch migration during recombination	Nucleoid	N		Yes	Yes		2.37371	0.773083	FtsH only	FtsH only	FtsH only	FtsH only		0.734211	0.487795	0.879165	0.729755	0.645492	0.0677709		20.5	10.1	12.2	13.7	17.9	12.2	13.7	8.6	12.2	12.2	19.3	17.9	17.9	4.5	10.1	12.2	17.9	14.3	5	2	3	3	4	3	3	2	3	3
EG10929	>EG10929 sbp Sulfate-binding protein, periplasmic	Periplasmic	G					0.974366	0.900085	1.47841	n.def	0.799978	n.def		n.def	n.def	n.def	n.def	n.def	n.def		4	9.1	9.1	0	4	12.2	9.1	7	16.1	7	9.1	16.1	13.4	4	9.1	20.4	16.1	16.1	1	2	2	0	1	2	2	1	3	2
EG10930;EG12756	>EG10930 sdaA L-Serine deaminase I	Peripheral inner membrane protein facing the cytoplasm	F1	Yes	Yes			3.29038	0.00588015	FtsH only	FtsH only	2.19508	0.099464		0.684243	0.35142	1.14579	0.682997	0.784	0.106967		9.9	11	7.3	14.3	12.8	10.8	6.8	12.8	9.7	3.3	6.6	8.8	4	1.8	7.5	6.6	4	7	3	4	2	4	4	4	2	5	3	2
EG10931	>EG10931 sdhA Succinate dehydrogenase (SQR) flavoprotein subunit	Peripheral inner membrane protein facing the cytoplasm	F1	Yes	Yes	Yes		4.32694	0.0415378	3.7328	0.00244229	5.15403	0.00104182		1.27673	0.63802	1.08522	0.802071	1.38553	0.488929		25.2	24.7	25.5	20.9	27.6	26.2	28.2	21.3	26.2	23	22.8	26.7	26.5	21.6	28.6	24	26	26	12	11	12	9	13	12	13	10	12	11
EG10932	>EG10932 sdhB Succinate dehydrogenase (SQR) iron-sulfur protein	Peripheral inner membrane protein facing the cytoplasm	F1	Yes	Yes	Yes		5.17206	0.0039497	5.59895	0.000741951	3.71428	0.000271113		1.04184	0.853796	0.751751	0.195234	0.783201	0.302154		28.2	35.7	28.2	38.7	33.2	15.5	31.9	23.9	33.2	18.9	18.1	18.1	25.6	11.8	21.4	23.5	24.8	26.1	6	7	6	9	7	4	7	5	7	4
EG10933	>EG10933 sdhC Succinate dehydrogenase (SQR) cytochrome b556	Integral Inner Membrane	B					n.def	n.def	n.def	n.def	n.def	n.def		n.def	n.def	n.def	n.def	n.def	n.def		0	18.6	18.6	18.6	9.3	9.3	18.6	9.3	18.6	9.3	9.3	18.6	9.3	0	9.3	9.3	18.6	18.6	0	2	2	2	1	1	2	1	2	1
EG10936	>EG10936 secA Preprotein translocase secAYEG receptor/ATPase subunit	Peripheral inner membrane protein facing the cytoplasm	F1					3.20554	0.0746945	1.67273	0.247743	9.57125	0.0992558		0.646956	0.151096	0.785725	0.243276	0.50833	0.0362543		6.8	30.9	29.2	27.5	34.1	26.2	28.4	22.4	28.9	16.2	19.5	28.5	31.3	22.6	33.5	23.8	22.2	32.5	5	19	17	16	19	15	16	14	18	11
EG10937	>EG10937 secB Protein export chaperone	Peripheral inner membrane protein facing the cytoplasm	F1	Yes				2.23579	0.0013174	1.90661	0.00958908	1.96984	0.0130644		1.03605	0.813445	0.77195	0.0590549	0.799775	0.205218		31.6	58.7	36.1	58.7	58.7	31.6	58.7	54.2	58.7	36.1	31.6	31.6	31.6	31.6	31.6	31.6	31.6	31.6	3	6	4	5	5	3	5	4	5	4
EG10938	>EG10938 secD SecDFyajC inner membrane secretion protein complex subunit	Integral Inner Membrane	B		Yes			3.02284	0.230469	2.20808	0.0368093	0.877539	0.484027		0.894261	0.783977	0.782458	0.388333	0.699722	0.193566		14.5	19.3	15.8	14.8	17.7	22	16.9	13.8	17.6	15.4	13.8	17.4	15.1	20	16.4	14.6	15.6	17.6	7	10	8	7	9	11	8	7	9	8
EG10939	>EG10939 secE SecYEG inner membrane translocon core subunit	Integral Inner Membrane	B			Yes		1.47807	n.def	n.def	n.def	FtsH only	FtsH only		0.837839	0.678846	0.836579	0.64288	0.700919	0.0764764		7.1	7.9	7.1	12.6	7.1	5.5	12.6	12.6	12.6	7.1	0	5.5	12.6	12.6	7.1	7.1	7.1	7.1	1	1	1	2	1	1	2	2	2	1
EG10940	>EG10940 secF SecDFyajC inner membrane secretion protein complex subunit	Integral Inner Membrane	B					1.91604	n.def	1.60657	n.def	0.994104	0.845933		n.def	n.def	n.def	n.def	n.def	n.def		9	16.1	9.9	9.9	9.9	9.9	9.9	4	16.1	9.9	12.1	9.9	9.9	9	21.4	12.1	15.2	9.9	2	3	2	2	2	2	2	1	3	2
EG10941	>EG10941 selA Selenocysteine synthase	Cytoplasmic	A					2.39075	n.def	0.0636788	n.def	0.163703	n.def		n.def	n.def	n.def	n.def	n.def	n.def		5.4	0	3	7.8	11.2	8.2	14.3	8.2	8	0	11	5.6	18.8	3	16	11	6	8.4	1	0	1	3	3	3	4	3	2	0
EG10942	>EG10942 selB Elongation factor promoting selenocysteine incorporation	Cytoplasmic	A					5.13041	n.def	n.def	n.def	8.86781	n.def		n.def	n.def	n.def	n.def	n.def	n.def		1.3	2.1	2.1	0	0	5.5	1.6	3.9	1.6	7.7	8.1	4.7	3.9	8.6	4.7	2.1	4.7	8	1	1	1	0	0	3	1	2	1	4
EG10943	>EG10943 selD Selenophosphate synthase, ATP-dependent	Cytoplasmic	A	Yes				2.74831	0.0114435	3.65952	n.def	6.13181	0.00348677		0.918159	0.65375	1.08369	0.740696	0.995001	0.981578		16.4	25.9	6.1	22.8	3.7	8.1	18.7	10.4	19.6	8.9	6.3	4.9	4.9	2.3	4.9	4.9	3.7	6.3	5	6	2	4	1	2	5	3	5	3
EG10944	>EG10944 serA D-3-Phosphoglycerate dehydrogenase	Cytoplasmic	A					0.834795	0.945679	2.76768	0.452592	0.957987	0.680411		1.89689	0.499732	0.852533	0.317283	1.61716	0.582505		25.4	20	20	28	24.9	24.9	23.2	15.9	21.7	20.7	28	20	23.2	23.2	24.9	20	23.2	26.3	9	7	7	10	9	9	8	7	8	7
EG10945	>EG10945 serB Phosphoserine phosphatase	Cytoplasmic	A		Yes			3.08518	n.def	FtsH only	FtsH only	1.35776	0.992209		n.def	n.def	0.73567	0.191579	n.def	n.def		11.5	4.7	17.1	21.7	12.4	23.9	12.4	12.4	10.2	4.7	8.1	20.2	8.1	0	8.1	13.7	12.7	12.7	3	1	4	5	3	5	3	3	3	1
EG10946	>EG10946 serC Phosphoserine aminotransferase	Cytoplasmic	A					5.38694	0.065205	3.09422	0.390598	2.82764	0.109873		0.997247	0.989586	0.340545	0.360884	0.339607	0.36095		38.4	37	35.1	50.3	41.4	28.7	49.7	34.8	47	40.3	34.8	37.6	42.8	31.2	37.8	35.1	37.8	39.8	10	10	9	14	12	8	13	9	12	11
EG10947	>EG10947 serS Serine--tRNA ligase	Peripheral inner membrane protein facing the cytoplasm	F1					3.60114	0.664008	0.204095	0.0247926	0.466606	0.526754		0.51008	0.213306	0.338428	0.239108	0.172625	0.151187		24.4	25.6	25.8	27.4	28.1	23	25.8	23.3	25.8	23.3	18.8	18.8	24.4	23.3	21.6	20.5	20.5	20.5	9	10	10	9	10	8	9	9	9	10
EG10948	>EG10948 maeA Malic enzyme, NAD-dependent	Cytoplasmic	A					1.36776	0.577387	n.def	n.def	n.def	n.def		n.def	n.def	n.def	n.def	n.def	n.def		3.4	11.3	13.3	14.5	7.4	4.8	9.9	5	1.2	6.9	8.1	11.2	3.4	1.2	13.6	4.2	4.4	5	2	5	6	5	4	3	4	3	1	4
EG10952	>EG10952 bamE Lipoprotein stabilizer of BamABCDE OM biogenesis complex	Outer Membrane Lipoprotein	I					3.57929	n.def	2.10522	n.def	2.6711	n.def		0.775446	0.240446	0.649475	0.131939	0.503632	0.0454973		17.7	17.7	17.7	17.7	17.7	17.7	17.7	17.7	17.7	17.7	17.7	17.7	17.7	0	17.7	17.7	17.7	17.7	1	1	1	1	1	1	1	1	1	1
EG10953	>EG10953 sodA Superoxide dismutase, Mn	Periplasmic	G					1.83978	0.320205	6.67224	0.236843	2.55289	0.452008		1.39368	0.609568	0.565737	0.567455	0.788456	0.772674		19.4	43.2	50	35.4	34	14.1	35.4	28.6	26.2	20.9	37.9	42.2	35.4	35.4	47.6	35.4	40.8	40.8	3	6	7	4	4	2	4	3	4	3
EG10954	>EG10954 sodB Superoxide dismutase, Fe	Periplasmic	G		Yes			0.422313	0.107695	3.51347	0.0124561	0.821319	0.564235		3.13247	0.0727406	0.308534	0.0268624	0.966473	0.921757		44.6	62.7	44.6	62.7	62.7	52.3	62.7	41.5	62.7	44.6	57	57	58	58	58	57	58	62.7	7	8	7	8	8	6	8	5	8	7
EG10956	>EG10956 sohB Multicopy suppressor of htrA(degP)	Integral Inner Membrane	B					n.def	n.def	n.def	n.def	n.def	n.def		n.def	n.def	n.def	n.def	n.def	n.def		0	0	0	0	0	12	0	0	0	3.7	0	0	0	0	0	0	3.7	0	0	0	0	0	0	2	0	0	0	1
EG10959	>EG10959 speA Biosynthetic decarboxylase	Periplasmic	G	Yes	Yes	Yes		3.94215	0.0183579	2.46588	0.0426508	4.05388	0.00169823		0.415233	0.260833	0.874617	0.765321	0.36317	0.00154967		17.9	21.1	21.4	15.7	17.6	21.7	20.5	14.9	19.6	19.8	16.9	18.4	15.3	11.2	19.5	13.8	24.3	18.1	8	11	11	8	9	11	10	8	10	10
EG10960	>EG10960 speB Agmatinase	Cytoplasmic	A					1.92892	n.def	0.64302	n.def	0.330797	n.def		n.def	n.def	n.def	n.def	n.def	n.def		0	9.2	3.9	3.9	0	3.3	5.2	8.2	9.8	9.8	3.3	16	13.4	4.9	11.4	0	8.2	4.9	0	2	1	1	0	1	1	2	3	3
EG10961	>EG10961 speC Ornithine decarboxylase	Cytoplasmic	A					n.def	n.def	0.51969	n.def	n.def	n.def		n.def	n.def	n.def	n.def	n.def	n.def		1.8	0	0	3.2	4.4	1.1	3.2	3.2	4.4	0	0	2.8	3.2	1.8	9	3.2	4.4	3.2	1	0	0	1	2	1	1	1	2	0
EG10962	>EG10962 speD S-adenosylmethionine decarboxylase, spermidine biosynthesis	Cytoplasmic	A			Yes		0.539573	n.def	0.195441	0.202813	FtsH only	FtsH only		n.def	n.def	2.89903	0.287469	n.def	n.def		12.5	9.1	12.5	26.1	12.5	9.1	22.7	11.7	6.8	9.1	9.1	19.7	26.1	16.3	15.5	9.1	16.3	9.1	3	2	3	5	3	2	4	2	2	2
EG10963	>EG10963 speE Spermidine synthase	Cytoplasmic	A					4.41195	n.def	1.03006	0.968193	1.96356	n.def		n.def	n.def	n.def	n.def	n.def	n.def		5.2	10.1	5.2	15.6	8.7	19.1	13.2	0	4.5	3.5	8.7	16	16.7	3.5	11.1	17.7	24.3	14.2	1	2	1	3	2	4	3	0	1	1
EG10965	>EG10965 gmk Guanylate kinase	Cytoplasmic	A		Yes			1.06556	0.847927	2.82304	0.025286	0.483794	0.0250705		0.723427	0.119317	0.798232	0.211005	0.577463	0.0371902		24.2	24.2	24.2	24.2	12.1	19.8	19.8	19.8	19.8	15.5	24.2	19.8	19.8	19.8	19.8	12.1	24.2	24.2	4	4	4	4	2	3	3	3	3	2
EG10966	>EG10966 spoT ppGpp 3-pyrophosphohydrolase and ppGpp synthase II	Cytoplasmic	A					0.00686956	n.def	0.0133329	n.def	n.def	n.def		n.def	n.def	n.def	n.def	n.def	n.def		0	0	1.4	0	0	1.4	0	1.1	0	1.4	2.3	3.7	1.4	0	3.7	2.3	1.4	0	0	0	1	0	0	1	0	1	0	1
EG10967	>EG10967 trmH tRNA mG18 2-O-methyltransferase, SAM-dependent	Cytoplasmic	A					n.def	n.def	n.def	n.def	n.def	n.def		n.def	n.def	n.def	n.def	n.def	n.def		0	0	0	0	0	8.3	8.3	0	8.3	0	0	8.3	0	0	0	0	0	0	0	0	0	0	0	1	1	0	1	0
EG10968	>EG10968 sppA Protease IV, signal peptide peptidase	Integral Inner Membrane	B					n.def	n.def	n.def	n.def	n.def	n.def		n.def	n.def	n.def	n.def	n.def	n.def		2.4	2.1	2.1	0	0	7	4.5	4.5	2.4	2.1	0	4.5	6.8	7	4.5	0	2.1	0	1	1	1	0	0	3	2	2	1	1
EG10973	>EG10973 gutQ D-arabinose 5-phosphate isomerase	Cytoplasmic	A					n.def	n.def	1.38153	n.def	n.def	n.def		n.def	n.def	n.def	n.def	n.def	n.def		2.5	2.5	0	0	2.5	0	0	7.5	2.5	0	0	0	2.5	0	5.3	0	0	0	1	1	0	0	1	0	0	2	1	0
EG10975	>EG10975 srmB ATP-dependent RNA helicase, 50S ribosomal subunit biogenesis	Peripheral inner membrane protein facing the cytoplasm	F1			Yes		0.743189	n.def	2.79854	n.def	FtsH only	FtsH only		n.def	n.def	n.def	n.def	n.def	n.def		4.5	7.7	6.1	3.4	3.4	15.1	6.3	5.9	13.3	2.7	4.3	8.6	5.9	8.6	8.6	5.9	8.1	5.2	2	3	2	1	1	5	2	2	4	1
EG10976	>EG10976 ssb Single-stranded DNA-binding protein	Cytoplasmic	A	Yes	Yes	Yes		2.64196	0.00605847	2.55506	0.0230419	5.63908	9.72582e-05		1.16421	0.34932	0.901406	0.445389	1.04942	0.664333		13.5	20.2	20.2	30.9	20.2	30.9	30.9	30.9	20.2	33.1	14	30.9	30.9	20.2	30.9	30.9	30.9	30.9	2	5	4	5	3	5	4	4	3	4
EG10977	>EG10977 sspA Stringent starvation protein A, phage P1 late gene activator	Cytoplasmic	A					0.356537	0.0792604	0.25229	0.204129	0.467969	0.332939		0.712993	0.669151	1.20855	0.816414	0.861685	0.789452		33	28.3	48.6	42	39.2	35.4	35.4	26.9	41.5	41.5	42.5	58.5	40.6	33	50.5	39.2	39.2	34.9	5	5	6	6	6	5	5	4	6	6
EG10978	>EG10978 sspB Specificity-enhancing factor for ClpXP protease, binds ssrA-tagged proteins	Peripheral inner membrane protein facing the cytoplasm	F1	Yes				FtsH only	FtsH only	4.27377	0.00309894	4.43267	0.00195189		1.40516	0.11841	0.537339	0.0449368	0.75505	0.17038		21.2	40.6	21.2	21.2	40.6	15.8	21.2	40.6	33.9	5.5	6.7	0	9.1	5.5	17	9.1	15.8	15.8	3	4	3	3	4	2	3	4	3	1
EG10979	>EG10979 sucA 2-oxoglutarate dehydrogenase, E1 component	Peripheral inner membrane protein facing the cytoplasm	F1	Yes		Yes		3.99155	0.0430277	1.36632	0.328425	2.86447	0.0117696		0.399583	0.372521	1.30149	0.72092	0.520052	0.0210417		37.1	53.3	52.4	47.2	49.5	41.4	47.7	39.8	45.3	34.9	42.2	42.8	41.7	44.2	47.2	44.3	41.7	40.5	26	38	35	30	34	27	32	27	30	27
EG10980	>EG10980 sucB 2-oxoglutarate dehydrogenase, E2 component	Peripheral inner membrane protein facing the cytoplasm	F1		Yes	Yes		2.8806	0.0642269	2.54828	0.00256304	4.01052	0.000673007		1.50084	0.0804548	0.864444	0.569954	1.2974	0.0699439		30.1	36.5	42	40.2	40.2	40	42.5	42.2	33.3	25.2	36	35.1	35.3	39.8	33.1	35.3	32.8	27.7	12	14	13	12	12	12	13	13	11	10
EG10981	>EG10981 sucC Succinyl CoA synthase beta-subunit	Peripheral inner membrane protein facing the cytoplasm	F1	Yes	Yes	Yes		3.51405	0.0197222	4.54122	0.00122375	4.57807	0.000611963		0.777333	0.478116	0.946485	0.841798	0.735733	0.0600257		38.9	42.5	42.8	40.2	36.6	41	45.9	40.5	43.6	37.9	43.8	40.2	44.1	37.9	37.9	39.4	38.4	37.1	12	13	13	12	11	12	14	12	13	13
EG10982	>EG10982 sucD Succinyl CoA synthase alpha-subunit	Peripheral inner membrane protein facing the cytoplasm	F1					1.91145	0.0382288	2.46211	0.0708809	1.5395	0.20581		0.871626	0.535965	0.683122	0.0663104	0.595427	0.00911892		29.4	34.9	36.3	32.9	30.1	43.6	36.3	30.4	30.1	21.8	28.7	36.3	32.9	23.9	32.2	26.6	22.5	32.2	8	8	8	7	7	9	8	7	7	6
EG10983	>EG10983 suhB Inositol-1-monophosphatase	Peripheral inner membrane protein facing the cytoplasm	F1					1.30995	0.729188	1.5339	0.585481	0.947599	0.871244		0.668173	0.584364	0.9572	0.947055	0.639575	0.321056		34.5	41.2	38.2	37.8	36.7	36.7	46.1	40.1	31.8	40.1	39.3	35.6	46.1	40.4	38.6	34.1	58.1	50.2	7	8	8	7	7	7	8	8	6	8
EG10985	>EG10985 surA Periplasmic OM porin chaperone, has PPIase activity	Periplasmic	G					0.834774	0.492359	2.60793	0.232839	1.78862	0.437518		1.08531	0.513336	0.550862	0.000572175	0.597857	0.00379527		16.6	24.1	29.9	20.8	25.2	24.5	26.9	19.6	28.5	8.9	23.8	27.8	11.9	18.2	24.5	20.1	28.3	18.5	6	8	9	6	8	10	8	8	9	3
EG10993	>EG10993 tdh Threonine dehydrogenase	Cytoplasmic	A	Yes		Yes		3.80596	0.0409144	1.10894	0.515298	3.30847	0.00414597		0.556613	0.513179	1.78396	0.510586	0.992975	0.983577		34.9	46	45.5	33.4	41.6	33.4	44	24.6	44	13.8	16.1	19.4	29.6	20.8	32.8	24.6	29.6	24.6	7	11	10	6	8	6	9	5	9	4
EG10994	>EG10994 tdk Deoxythymidine kinase	Cytoplasmic	A					1.26641	n.def	1.11781	0.974984	0.740797	n.def		n.def	n.def	0.785939	0.189787	n.def	n.def		10.2	17.1	17.1	23.4	17.1	6.8	23.4	6.3	23.4	6.8	6.8	17.1	23.4	17.1	6.8	23.4	6.3	16.6	1	2	2	3	2	1	3	1	3	1
EG10995	>EG10995 tesB Acyl-CoA thioesterase II	Cytoplasmic	A					n.def	n.def	n.def	n.def	n.def	n.def		n.def	n.def	n.def	n.def	n.def	n.def		9.1	0	0	0	0	0	0	0	0	0	0	0	0	0	0	0	0	5.6	2	0	0	0	0	0	0	0	0	0
EG10996	>EG10996 tgt tRNA-guanine transglycosylase	Cytoplasmic	A			Yes		1.56701	n.def	0.311568	n.def	FtsH only	FtsH only		n.def	n.def	n.def	n.def	n.def	n.def		10.7	16.3	15.2	23.2	21.1	16.8	20.8	16.8	23.2	8.3	4.5	16.5	23.7	8.3	13.3	18.9	23.2	13.3	3	5	4	6	5	4	5	5	6	3
EG10997	>EG10997 mnmE GTPase required for 5-methylaminomethyl-2-thiouridine modification at tRNA U34	Peripheral inner membrane protein facing the cytoplasm	F1					1.08167	n.def	0.0787171	n.def	n.def	n.def		n.def	n.def	n.def	n.def	n.def	n.def		2.2	5.3	2.2	0	1.8	7.7	0	9.9	2.9	6.6	4.4	11	7.7	2.9	0	6.8	9.5	0	1	2	1	0	1	2	0	3	1	3
EG10998	>EG10998 thrA Aspartokinase I and homoserine dehydrogenase I, bifunctional	Peripheral inner membrane protein facing the cytoplasm	F1					0.693949	0.704589	0.584151	0.429887	0.495132	0.18367		1.31274	0.695496	1.00321	0.994233	1.31695	0.640564		8.3	25.5	22.2	22	22.1	24	28.2	24.3	25.9	17	22.4	16.3	23.3	24.8	28.7	23.4	23.3	23.3	5	15	14	13	13	14	16	14	14	10
EG10999	>EG10999 thrB Homoserine kinase	Cytoplasmic	A					4.04344	n.def	2.11721	0.224153	0.477284	n.def		n.def	n.def	n.def	n.def	n.def	n.def		5.2	9.4	6.5	5.8	5.8	3.2	6.8	2.6	2.6	0	10	9.4	9.4	5.8	3.5	6.8	5.8	3.5	2	3	2	2	2	1	2	1	1	0
EG11000	>EG11000 thrC Threonine synthase	Cytoplasmic	A					0.671177	n.def	0.525357	0.146844	0.535808	0.620203		n.def	n.def	0.391444	0.313336	n.def	n.def		22.7	32.5	31.5	31.5	47.2	39.7	34.6	33.4	28.5	21.5	28	40.9	34.6	28.5	40.4	35	30.8	43.9	6	10	8	8	13	11	9	9	8	6
EG11001	>EG11001 thrS Threonine--tRNA ligase, autogenously regulated	Peripheral inner membrane protein facing the cytoplasm	F1	Yes	Yes	Yes		5.90391	0.00947766	13.676	0.00740362	12.8784	0.00977822		0.907654	0.790199	0.760241	0.312283	0.690035	0.156436		16.4	28.7	27.7	22.7	26.6	23.7	30.4	19.5	28.5	20.7	17.8	24	14.8	14.8	24.8	18.7	15.3	16.7	12	17	17	12	16	13	16	11	17	14
EG11002	>EG11002 thyA Thymidylate synthase	Cytoplasmic	A					0.849476	0.557992	1.65966	n.def	n.def	n.def		0.903413	0.508821	0.82305	0.248997	0.743555	0.0944167		9.8	15.2	4.9	14.4	4.9	4.9	16.3	4.9	6.1	9.8	15.2	15.2	6.1	4.9	0	0	0	0	2	3	1	3	1	1	3	1	1	2
EG11003	>EG11003 tig Trigger factor, protein folding chaperone	Peripheral inner membrane protein facing the cytoplasm	F1		Yes	Yes		6.33375	0.0565015	18.427	5.92174e-05	12.3209	8.31151e-05		1.04385	0.598263	0.671925	0.00756171	0.701388	0.0135216		55.8	59	54.4	55.8	46.3	52.1	53	50	53	50.7	54.6	53.2	57.6	59.3	52.5	55.1	57.4	49.5	26	29	24	21	19	21	23	19	23	19
EG11005	>EG11005 tnaA Tryptophanase, also has cysteine desulfhydrase activity	Cytoplasmic	A					n.def	n.def	n.def	n.def	n.def	n.def		n.def	n.def	n.def	n.def	n.def	n.def		0	7	0	0	0	0	0	0	0	0	0	0	0	0	7	11.7	0	7	0	1	0	0	0	0	0	0	0	0
EG11007	>EG11007 tolA Tolerance to group A colicins, single-stranded filamentous DNA phage	Integral Inner Membrane	B					2.48902	n.def	n.def	n.def	3.78304	n.def		n.def	n.def	n.def	n.def	n.def	n.def		3.8	3.8	3.8	3.8	3.8	3.8	8.3	0	8.3	3.8	3.8	3.8	3.8	3.8	0	3.8	3.8	3.8	1	1	1	1	1	1	2	0	2	1
EG11008	>EG11008 tolB Uptake of group A colicins, mutants are tolerant to colicins E1-3, A, and K	Periplasmic	G					1.42962	0.473215	1.84893	0.300852	1.00618	0.829748		0.985524	0.946233	0.910264	0.716466	0.897087	0.636319		19.3	31.6	30	32.1	32.1	13.5	28.1	14.2	24	25.6	34	25.6	27.9	13	34.2	21.4	19.8	19.8	6	9	9	9	9	5	8	5	8	9
EG11009	>EG11009 tolC Outer membrane factor (OMF) of tripartite efflux pumps	Outer Membrane b-barrel protein	H	Yes	Yes			3.31528	0.0160586	3.10563	0.035449	1.44122	0.258043		0.967481	0.862014	0.657571	0.115736	0.636187	0.116457		13.2	19.7	26.4	14.4	12.2	22.7	18.9	9.9	25.8	7.3	13.2	13.4	7.7	7.1	9.9	7.1	11.6	7.7	5	7	8	5	4	7	6	4	8	3
EG11010	>EG11010 tolQ Tolerance to group A colicins and ssDNA filamentous phage	Integral Inner Membrane	B					3.57995	n.def	3.49345	n.def	n.def	n.def		0.956516	0.851738	0.870462	0.467308	0.832611	0.345731		13	6.5	6.5	6.5	6.5	13	20.9	13	6.5	0	6.5	6.5	6.5	6.5	6.5	6.5	6.5	6.5	2	1	1	1	1	2	3	2	1	0
EG11011	>EG11011 tolR Colicin import	Integral Inner Membrane	B					n.def	n.def	n.def	n.def	n.def	n.def		n.def	n.def	n.def	n.def	n.def	n.def		9.2	9.2	0	9.2	0	9.2	9.2	9.2	0	0	9.2	0	0	0	6.3	9.2	14.1	0	1	1	0	1	0	1	1	1	0	0
EG11013	>EG11013 topA Topoisomerase I	Nucleoid	N					1.38412	0.328757	0.586382	0.274097	1.64974	0.0333772		0.417978	0.0919248	1.39942	0.2906	0.584927	0.108612		2.5	12	8.2	4.2	5.1	11.4	6.9	11.4	13.1	8.7	10.2	13.9	11.9	7.3	9.7	12.1	9.7	6.9	2	7	5	3	4	7	5	7	8	6
EG11015	>EG11015 tpiA Triosephosphate isomerase	Peripheral inner membrane protein facing the cytoplasm	F1	Yes	Yes	Yes		2.93893	0.0241855	3.99302	0.00137501	4.04523	0.00662063		1.18935	0.357318	0.707683	0.148122	0.841684	0.459919		38.8	46.7	42	56.1	38.8	35.3	38.8	51.8	38.8	25.5	26.3	34.1	35.3	22.7	38.4	38.4	40	35.3	6	8	7	8	6	5	6	6	6	5
EG11019	>EG11019 trkA Major constitutive K+ uptake permeases TrkAG and TrkAH	Peripheral inner membrane protein facing the cytoplasm	F1			Yes		1.84747	0.0457247	1.27033	0.408271	4.2792	0.000233552		0.681361	0.632206	1.50914	0.613092	1.02827	0.896582		17.7	29.5	38	4.6	44.1	35.6	25.3	37.8	36	15.9	13.1	17	16.2	23.1	30.8	11.8	9.8	10	8	9	13	2	15	13	7	11	13	6
EG11022	>EG11022 trmA tRNA m(5)U54 methyltransferase, SAM-dependent	Cytoplasmic	A					1.29692	n.def	0.790781	n.def	0.779417	n.def		n.def	n.def	n.def	n.def	n.def	n.def		6.6	4.9	3	0	0	9.6	9.6	4.9	4.9	1.9	4.6	7.9	4.9	3	6.8	9.6	3	3	2	1	1	0	0	2	2	1	1	1
EG11023	>EG11023 trmD tRNA m(1)G37 methyltransferase, SAM-dependent	Cytoplasmic	A	Yes	Yes	Yes		3.04707	0.0364503	FtsH only	FtsH only	FtsH only	FtsH only		1.01241	0.955829	0.448299	0.204116	0.453864	0.211867		19.6	27.8	9.8	24.3	5.9	9.8	24.3	13.3	21.6	9.4	9.8	9.4	0	9.4	0	5.9	5.9	5.9	4	5	3	5	2	3	5	4	5	3
EG11024	>EG11024 trpA Tryptophan synthase, alpha subunit	Cytoplasmic	A					0.380298	n.def	4.56476	n.def	n.def	n.def		n.def	n.def	n.def	n.def	n.def	n.def		26.1	22	26.1	11.6	25.7	18.3	26.1	21.6	26.1	20.9	22.8	29.9	22.4	18.3	22.4	18.3	18.3	18.3	5	3	5	2	4	3	4	4	4	4
EG11025	>EG11025 trpB Tryptophan synthase, beta subunit	Cytoplasmic	A					1.07156	0.904995	6.42867	0.526629	0.272942	n.def		0.687063	0.157469	0.484008	0.133474	0.332544	0.0779481		5.8	6.3	3	7.1	3.3	7.6	13.6	11.3	3	3.3	6.3	3	4	10.3	6.3	5	7.1	0	2	2	1	2	1	2	3	3	1	1
EG11026	>EG11026 trpC Tryptophan synthesis, bifunctional: N-(5-phosphoribosyl)anthranilate isomerase and indole-3-glycerolphosphate synthase	Cytoplasmic	A					n.def	n.def	n.def	n.def	n.def	n.def		n.def	n.def	n.def	n.def	n.def	n.def		2.4	0	0	0	0	0	0	0	0	0	0	2.4	2.4	0	2.4	2.4	0	0	1	0	0	0	0	0	0	0	0	0
EG11030	>EG11030 trpS Tryptophan--tRNA ligase	Cytoplasmic	A					3.00137	0.601248	2.02426	0.210861	2.53518	0.202363		0.76885	0.518163	0.651932	0.0757777	0.501238	0.0734898		21.6	29	29	31.4	28.4	19.8	24.9	12.3	28.4	3.6	22.2	24.6	28.1	6.3	31.4	24.9	31.1	28.1	5	6	6	7	6	5	6	4	6	1
EG11031	>EG11031 trxA Thioredoxin 1	Peripheral inner membrane protein facing the cytoplasm	F1					0.532886	0.134551	0.68266	0.292184	0.628834	0.335438		1.37973	0.292793	0.614272	0.205476	0.847529	0.577085		47.7	46.8	36.7	36.7	36.7	47.7	55	44	44	55	35.8	36.7	47.7	36.7	33.9	50.5	47.7	47.7	4	4	3	3	3	4	5	4	4	5
EG11032	>EG11032 trxB Thioredoxin reductase, NADP+, FAD-binding	Periplasmic	G					1.03984	0.391749	0.289577	0.115886	1.08212	0.955215		0.417976	0.153645	2.42884	0.234236	1.0152	0.982769		29.6	35.5	33.6	51.7	37.4	25.9	37.7	9.7	32.4	19	11.8	33.3	37.4	33.6	42.7	23.7	43.9	34.6	6	7	7	9	8	6	7	2	5	5
EG11033	>EG11033 tsf EF-Ts, Elongation Factor-Translation, stable	Peripheral inner membrane protein facing the cytoplasm	F1	Yes	Yes	Yes		2.55447	0.0118034	4.05423	0.00137217	9.41364	0.00238563		1.02502	0.833479	0.721483	0.0543048	0.739536	0.0629829		53.7	49.5	58.3	55.1	50.2	50.9	45.9	56.9	50.5	60.4	58.7	55.5	51.9	55.1	50.2	50.2	49.1	50.9	16	15	16	15	14	13	13	15	15	16
EG11035	>EG11035 tsx Outer membrane channel for nucleosides	Outer Membrane b-barrel protein	H					5.45533	n.def	0.810489	n.def	0.344002	n.def		n.def	n.def	n.def	n.def	n.def	n.def		4.1	7.8	4.1	9.5	0	4.1	4.1	4.1	0	0	7.8	9.5	4.1	0	9.5	11.9	11.9	4.1	1	1	1	2	0	1	1	1	0	0
EG11037;EG11036	>EG11037 tufB EF-Tu, Elongation Factor-Translation, unstable;>EG11036 tufA EF-Tu, Elongation Factor-Translation, unstable	Peripheral inner membrane protein facing the cytoplasm	F1	Yes	Yes	Yes		3.40566	0.00980105	6.34309	4.82263e-05	6.31634	0.000253483		1.08692	0.703837	0.674886	0.0143511	0.733545	0.152611		67.5	65	64	64.7	64	65.2	66	65.7	61.7	62.4	65	61.2	59.9	67	65.5	61.2	61.2	61.2	22	21	19	20	19	19	19	20	18	18
EG11039	>EG11039 tyrA Tyrosine synthesis: chorismate mutase/prephenate dehydrogenase	Cytoplasmic	A	Yes		Yes		FtsH only	FtsH only	0.0838358	0.0308005	3.01501	0.0072066		0.288788	0.34144	2.37	0.432436	0.684427	0.181259		14.7	22.3	18.8	20.9	16.9	22.8	26.3	19.3	19	2.1	2.1	14.2	19	7	15.3	21.2	14.2	14.2	5	6	4	5	4	7	6	5	4	1
EG11040	>EG11040 tyrB Tyrosine aminotransferase	Cytoplasmic	A					0.7675	0.37305	0.388345	0.0491286	0.227664	0.120225		0.581013	0.126043	0.769472	0.615981	0.447074	0.252072		27.2	20.9	22.9	31.2	24.9	24.9	24.9	19.1	24.9	17.1	24.9	24.9	21.2	15.4	24.9	21.2	21.2	21.2	8	7	6	8	7	7	7	5	7	6
EG11042	>EG11042 tyrR TyrR regulon repressor or activator	Nucleoid	N					n.def	n.def	1.87537	n.def	n.def	n.def		n.def	n.def	n.def	n.def	0.588598	0.236181		1.6	3.3	4.5	0	4.5	11.3	10.5	2.1	4.5	1.6	2.3	2.1	10.5	3.9	2.3	4.5	6.2	0	1	2	2	0	2	5	4	1	2	1
EG11043	>EG11043 tyrS Tyrosine--tRNA ligase	Peripheral inner membrane protein facing the cytoplasm	F1					3.32847	0.329733	0.777555	0.370689	1.09104	0.816063		0.869526	0.648819	0.84476	0.44947	0.734541	0.24389		25.2	30.2	25.7	32.3	28.3	27.6	29.2	22.9	28.5	23.8	23.6	29.7	22.4	20.3	35.4	23.8	25.7	30	10	10	9	10	10	9	10	8	9	9
EG11045	>EG11045 udp Uridine phosphorylase	Cytoplasmic	A					1.0622	0.969521	0.763145	0.298544	1.64847	0.608908		0.76287	0.27382	1.01865	0.931176	0.777096	0.211423		39.1	34.4	43.5	39.1	26.5	26.5	26.5	21.3	26.5	28.9	39.1	30.4	34	35.2	30.4	30.4	39.1	43.5	6	5	7	7	4	4	4	4	4	5
EG11047	>EG11047 ugpB sn-Glycerol-3-phosphate transport system, periplasmic binding protein	Periplasmic	G					n.def	n.def	n.def	n.def	n.def	n.def		n.def	n.def	n.def	n.def	n.def	n.def		0	2.7	0	0	0	2.7	2.7	2.7	0	0	0	2.7	0	0	0	0	0	0	0	1	0	0	0	1	1	1	0	0
EG11054	>EG11054 uhpT Hexose phosphate permease	Integral Inner Membrane	B					n.def	n.def	n.def	n.def	n.def	n.def		n.def	n.def	n.def	n.def	n.def	n.def		0	0	0	0	0	0	2.8	0	0	0	0	0	0	0	0	0	0	0	0	0	0	0	0	0	1	0	0	0
EG11058	>EG11058 ung Uracil-DNA glycosylase	Cytoplasmic	A					n.def	n.def	1.10479	n.def	n.def	n.def		n.def	n.def	n.def	n.def	n.def	n.def		3.1	0	0	3.9	0	3.5	7.4	3.5	7.4	7.4	0	7.4	3.5	3.5	3.5	3.5	3.5	3.5	1	0	0	1	0	1	2	1	2	2
EG11059	>EG11059 usg Aspartate-semialdehyde dehydrogenase paralog, function unknown	Cytoplasmic	A	Yes				4.41414	0.000880926	11.1031	0.0933048	10.2179	0.060001		1.41651	0.0377053	0.905204	0.403212	1.28223	0.0260795		20.2	20.2	17.8	27.3	15.7	14.8	20.2	20.2	27.3	12.5	16.6	15.7	20.2	14.8	20.2	15.7	20.2	12.2	5	4	4	6	4	4	5	5	6	3
EG11060	>EG11060 ushA UDP-glucose hydrolase, 5-nucleotidase, CDP-alcohol hydrolase	Periplasmic	G					0.54257	n.def	1.31721	n.def	1.65931	n.def		n.def	n.def	n.def	n.def	n.def	n.def		0	10	2	0	4.4	0	2	2.2	4.4	6.5	6.5	5.5	2.4	6.7	8.7	2.2	6.5	5.5	0	4	1	0	2	0	1	1	2	3
EG11061	>EG11061 uvrA Excision nuclease subunit A	Peripheral inner membrane protein facing the cytoplasm	F1		Yes			0.587123	n.def	FtsH only	FtsH only	1.27471	0.432172		n.def	n.def	0.647015	0.0455881	n.def	n.def		5.7	5.5	4.7	7.4	6.5	6.3	3.2	7.9	7.7	6.6	8.8	6.6	5.4	5.5	7	10	8.1	4.6	4	4	3	5	4	5	2	6	5	5
EG11062	>EG11062 uvrB Excision nuclease subunit B, ATPase I and helicase II	Nucleoid	N					n.def	n.def	4.11332	n.def	2.26469	n.def		n.def	n.def	n.def	n.def	n.def	n.def		4.5	2.5	2.5	0	2.5	4.5	2.5	0	7.1	0	3.3	2.5	1.9	2.1	2.5	0	0	2.5	2	1	1	0	1	2	1	0	3	0
EG11064	>EG11064 uvrD ATP-dependent 3-5 DNA helicase II	Nucleoid	N					0.131229	n.def	7.14081	n.def	1.66668	n.def		n.def	n.def	n.def	n.def	n.def	n.def		0	4.9	3.3	1.7	1.7	1.7	6.1	0	1.7	1.7	1.7	4.9	0	1.7	1.7	1.7	3.3	1.5	0	3	2	1	1	1	4	0	1	1
EG11066	>EG11066 uxuA D-Mannonate dehydratase (hydrolase)	Cytoplasmic	A					0.247988	n.def	n.def	n.def	2.2094	n.def		n.def	n.def	n.def	n.def	n.def	n.def		3	0	3	0	0	0	0	3	3	3	0	0	0	3	4.8	3	0	0	1	0	1	0	0	0	0	1	1	1
EG11067	>EG11067 valS Valine--tRNA ligase	Cytoplasmic	A					1.11592	0.523171	0.624472	0.484761	0.943799	0.616184		0.41973	0.379997	1.50339	0.596124	0.631016	0.0734415		12.9	28.2	27.1	25.8	23.8	20.5	29.4	15.7	26.5	19.7	22.8	31.7	24.8	15.9	32.2	23	31	29.7	10	19	19	20	18	15	21	11	19	15
EG11069	>EG11069 xerC Tyrosine recombinase XerCD resolves chromosome dimers	Nucleoid	N			Yes		2.82719	0.0616814	1.08198	n.def	FtsH only	FtsH only		n.def	n.def	n.def	n.def	0.714069	0.453083		24.8	21.1	23.2	19.8	10.7	3.4	20.5	19.8	16.4	12.1	4	8.7	9.1	4.7	4	4.7	8.4	4	7	6	6	5	3	1	5	5	4	3
EG11070	>EG11070 dsbC Disulfide bond isomerase, periplasmic	Periplasmic	G					0.593971	n.def	1.31467	n.def	n.def	n.def		n.def	n.def	n.def	n.def	n.def	n.def		5.5	0	6.8	15.7	15.7	8.9	0	8.9	0	0	0	8.9	8.9	6.8	0	0	0	0	1	0	1	2	2	1	0	1	0	0
EG11071	>EG11071 xerD Tyrosine recombinase XerCD resolves chromosome dimers	Nucleoid	N					0.865594	0.892147	1.39547	0.860021	0.619354	0.433712		1.01476	0.980865	0.67773	0.565822	0.687735	0.576881		32.9	52.3	25.5	49.3	35.2	23.5	41.3	18.8	32.6	12.4	15.4	12.4	25.2	21.1	31.2	21.8	28.5	34.9	9	13	7	11	8	6	10	4	8	3
EG11073	>EG11073 xthA Exodeoxyribonuclease III and AP endodeoxyribonuclease VI	Nucleoid	N					2.11925	n.def	1.10632	n.def	n.def	n.def		n.def	n.def	n.def	n.def	n.def	n.def		14.2	14.6	9	15.3	10.8	9	15.3	4.5	14.2	0	4.5	9	9	4.5	9	8.2	9	12.7	3	3	2	3	2	2	3	1	2	0
EG11079	>EG11079 ribF Riboflavin kinase and FAD synthase, riboflavin biosynthesis	Cytoplasmic	A					25.9428	n.def	n.def	n.def	n.def	n.def		n.def	n.def	n.def	n.def	n.def	n.def		0	8.6	0	6.7	0	0	5.1	0	14.7	0	3.5	5.1	9.6	0	0	11.8	8	5.1	0	2	0	1	0	0	1	0	3	0
EG11080	>EG11080 fkpB FKBP-type peptidyl-prolyl cis-trans isomerase	Cytoplasmic	A					n.def	n.def	n.def	n.def	n.def	n.def		1.50185	0.316741	n.def	n.def	n.def	n.def		16.1	16.1	16.1	16.1	16.1	16.1	16.1	0	16.1	0	0	0	0	0	0	0	0	0	1	1	1	1	1	1	1	0	1	0
EG11081	>EG11081 ispH 4-hydroxy-3-methylbut-2-enyl diphosphate reductase	Cytoplasmic	A					n.def	n.def	n.def	n.def	n.def	n.def		n.def	n.def	n.def	n.def	n.def	n.def		10.8	13.9	7.9	13.9	12.7	9.5	7.9	0	13.9	0	0	12.7	0	0	10.8	12.7	18.7	18.7	2	2	1	3	2	2	2	0	2	0
EG11083	>EG11083 rapA RNA polymerase-associated, ATP-dependent RNA translocase	Cytoplasmic	A					1.80853	0.181626	2.65547	0.195214	3.13282	n.def		0.717078	0.620739	1.14934	0.786879	0.824167	0.624835		1.1	7.4	6.3	8.1	6.3	4.6	11.3	3.4	9.4	5.6	1.2	2.2	4.6	3.4	6.8	1.2	8.2	3.4	1	5	5	6	5	4	6	3	6	5
EG11084	>EG11084 mraZ Inhibitor of RsmH methyltransferase activity	Cytoplasmic	A					n.def	n.def	n.def	n.def	n.def	n.def		n.def	n.def	n.def	n.def	n.def	n.def		0	0	23.7	0	0	0	0	23.7	0	0	0	5.3	0	0	0	0	10.5	0	0	0	1	0	0	0	0	1	0	0
EG11085	>EG11085 rsmH 16S rRNA m(4)C1402 methyltransferase, SAM-dependent	Peripheral inner membrane protein facing the cytoplasm	F1					0.0868096	n.def	0.456717	n.def	0.971434	n.def		n.def	n.def	n.def	n.def	n.def	n.def		3.5	9.9	3.5	0	3.5	0	0	8.6	3.5	3.5	0	0	0	3.5	0	0	9.9	3.5	1	2	1	0	1	0	0	2	1	1
EG11088	>EG11088 pdhR Pyruvate dehydrogenase operon (pdhR-aceEF-lpd) repressor	Nucleoid	N					n.def	n.def	0.140321	n.def	n.def	n.def		n.def	n.def	n.def	n.def	n.def	n.def		0	0	0	9.1	0	0	0	0	0	0	0	0	0	5.5	0	0	0	0	0	0	0	1	0	0	0	0	0	0
EG11090	>EG11090 mtn 5-Methylthioadenosine nucleosidase	Cytoplasmic	A					1.71686	n.def	1.18795	n.def	n.def	n.def		n.def	n.def	n.def	n.def	n.def	n.def		21.6	21.1	16.4	7.8	16.4	11.6	16.4	5.2	16.4	0	6.5	16.4	16.4	6.5	24.1	21.1	9.9	6.5	3	3	2	1	2	2	2	1	2	0
EG11091	>EG11091 frsA Fermentation-respiration switch protein	Cytoplasmic	A	Yes				FtsH only	FtsH only	1.01602	n.def	0.918137	n.def		n.def	n.def	n.def	n.def	n.def	n.def		6	8	8	9.2	5.3	11.1	3.4	8.5	3.1	2.7	3.9	5.3	3.1	5.1	5.1	5.1	5.1	8.5	2	3	3	3	2	4	1	3	1	1
EG11092	>EG11092 crl Sigma factor-binding protein, stimulates RNAP holoenzyme formation	Nucleoid	N	Yes				FtsH only	FtsH only	1.14525	0.817371	0.360454	0.0177092		0.590715	0.142823	0.856271	0.480161	0.505813	0.00108555		24.8	27.8	34.6	27.8	27.8	9	18.8	18.8	18.8	0	18	9.8	18.8	18.8	34.6	18	34.6	27.8	3	3	4	3	3	1	2	2	2	0
EG11096	>EG11096 yajC SecDFyajC membrane secretion complex subunit	Integral Inner Membrane	B	Yes	Yes			5.23828	0.00569425	6.74626	0.00216511	10.0685	0.000252173		0.852066	0.597561	0.946207	0.809338	0.80623	0.322961		44.5	26.4	20	38.2	38.2	20	38.2	20	38.2	20	26.4	8.2	20	20	20	20	8.2	20	4	3	2	3	3	2	3	2	3	2
EG11097	>EG11097 yajD Function unknown, HNH family	Cytoplasmic	A					n.def	n.def	n.def	n.def	n.def	n.def		n.def	n.def	n.def	n.def	n.def	n.def		23.5	23.5	0	30.4	16.5	0	16.5	16.5	0	0	0	0	16.5	0	0	0	0	0	2	2	0	3	1	0	1	1	0	0
EG11100	>EG11100 ybaB DNA-binding protein, function unknown	Cytoplasmic	A	Yes				FtsH only	FtsH only	0.460788	0.137283	0.41281	n.def		1.4654	0.285051	n.def	n.def	n.def	n.def		39.4	39.4	25.7	66.1	25.7	32.1	39.4	18.3	39.4	39.4	25.7	25.7	39.4	39.4	25.7	39.4	39.4	25.7	3	3	2	4	2	2	3	1	3	3
EG11102	>EG11102 gsk Inosine-guanosine kinase	Cytoplasmic	A					n.def	n.def	n.def	n.def	n.def	n.def		n.def	n.def	n.def	n.def	n.def	n.def		0	8.1	0	4.6	0	0	0	0	0	0	0	2.8	1.8	0	0	2.8	2.8	0	0	3	0	2	0	0	0	0	0	0
EG11108	>EG11108 ybgA Function unknown, DUF1722 family	Cytoplasmic	A	Yes				FtsH only	FtsH only	n.def	n.def	n.def	n.def		n.def	n.def	n.def	n.def	n.def	n.def		11.2	16.6	15.4	0	16.6	6.5	0	6.5	0	4.1	0	0	0	0	0	0	0	0	2	3	3	0	3	1	0	1	0	1
EG11116	>EG11116 yceA Predicted rhodanese, function unknown	Cytoplasmic	A	Yes				FtsH only	FtsH only	4.98297	n.def	3.66991	n.def		0.535393	0.016713	n.def	n.def	n.def	n.def		12.6	10.6	10.6	10.6	4	10.6	10.6	0	4	4	4	4	4	0	10.6	4	4	4	3	2	2	2	1	2	2	0	1	1
EG11117	>EG11117 yceB Novel verified lipoprotein, DUF1439 family, function unknown	Outer Membrane Lipoprotein	I			Yes		6.51582	0.432143	1.80265	0.459905	10.157	0.0226726		1.59833	0.370912	1.05791	0.820594	1.6909	0.341367		15.1	27.4	27.4	33.9	33.9	27.4	27.4	15.1	33.9	8.1	13.4	27.4	33.9	21.5	33.9	27.4	26.9	20.4	2	3	3	4	4	3	3	2	4	1
EG11118	>EG11118 rluC 23S rRNA pseudouridine(955,2504,2580) synthase	Cytoplasmic	A					n.def	n.def	1.09977	n.def	n.def	n.def		n.def	n.def	n.def	n.def	n.def	n.def		0	11.9	5.6	12.9	3.4	8.2	8.2	7.2	7.2	0	0	0	3.4	6	4.7	3.4	0	8.2	0	3	2	3	1	2	2	2	2	0
EG11119	>EG11119 yceD Function unknown, DUF177 family	Cytoplasmic	A					n.def	n.def	n.def	n.def	n.def	n.def		n.def	n.def	n.def	n.def	n.def	n.def		6.4	14.5	14.5	8.1	0	8.1	8.1	8.1	14.5	13.3	6.4	8.1	8.1	8.1	8.1	14.5	8.1	8.1	1	2	2	1	0	1	1	1	2	2
EG11121	>EG11121 yciA Acyl-CoA esterase, role unknown	Cytoplasmic	A					1.93647	n.def	1.60864	n.def	1.12463	n.def		n.def	n.def	n.def	n.def	n.def	n.def		10.6	10.6	10.6	10.6	10.6	10.6	10.6	0	10.6	0	10.6	10.6	10.6	10.6	10.6	10.6	10.6	10.6	1	1	1	1	1	1	1	0	1	0
EG11132	>EG11132 ppsR PEP synthase regulatory protein PSRP	Cytoplasmic	A					n.def	n.def	n.def	n.def	n.def	n.def		n.def	n.def	n.def	n.def	n.def	n.def		0	0	0	0	0	0	0	0	0	0	0	0	0	0	0	0	0	8.7	0	0	0	0	0	0	0	0	0	0
EG11134	>EG11134 ydjA Predicted nitroreductase, function unknown, binds FMN	Cytoplasmic	A					1.93585	0.230423	1.42642	0.791126	1.15098	0.974973		0.38214	0.204089	0.844348	0.787311	0.322659	0.194272		25.7	37.2	14.2	32.8	29.5	23.5	36.6	35	36.6	20.2	29.5	25.7	35	35	29.5	29.5	36.6	11.5	4	6	2	5	4	3	5	5	5	3
EG11135	>EG11135 pncA Pyrazinamidase/nicotinamidase	Cytoplasmic	A					n.def	n.def	n.def	n.def	n.def	n.def		n.def	n.def	n.def	n.def	n.def	n.def		0	0	0	0	0	0	5.6	0	0	3.8	0	0	0	0	0	0	0	0	0	0	0	0	0	0	1	0	0	1
EG11137	>EG11137 yebC Function unknown, expressed protein, UPF0082 family	Cytoplasmic	A					2.26127	0.296503	1.9156	0.22678	2.91352	0.189701		1.14242	0.908742	1.54791	0.692769	1.76837	0.586962		5.3	8.5	8.5	8.5	8.5	5.3	8.5	8.5	8.5	8.9	12.2	12.2	8.5	8.5	5.3	8.5	8.5	5.3	1	2	2	2	2	1	2	2	2	2
EG11139	>EG11139 yecA UPF0149 family protein, function unknown,	Cytoplasmic	A					n.def	n.def	n.def	n.def	n.def	n.def		n.def	n.def	n.def	n.def	n.def	n.def		6.8	8.1	0	0	0	0	0	0	0	0	6.8	0	0	0	0	0	0	6.8	1	1	0	0	0	0	0	0	0	0
EG11143	>EG11143 ubiG SAM:OMHMB methyltransferase	Cytoplasmic	A					1.27767	n.def	n.def	n.def	n.def	n.def		n.def	n.def	n.def	n.def	n.def	n.def		7.9	0	7.9	7.9	7.9	7.9	0	7.9	7.9	7.9	0	0	0	0	7.9	0	7.9	7.9	1	0	1	1	1	1	0	1	1	1
EG11147	>EG11147 yffB Predicted reductase, function unknown, ArsC family	Cytoplasmic	A					n.def	n.def	n.def	n.def	n.def	n.def		n.def	n.def	n.def	n.def	n.def	n.def		16.1	0	16.1	0	0	0	0	0	0	0	0	0	0	0	0	0	0	0	1	0	1	0	0	0	0	0	0	0
EG11151	>EG11151 raiA Protein Y, associated with 30S ribosomal subunit	Peripheral inner membrane protein facing the cytoplasm	F1			Yes		0.572963	n.def	2.83369	n.def	FtsH only	FtsH only		n.def	n.def	n.def	n.def	n.def	n.def		30.1	20.4	20.4	0	0	12.4	32.7	32.7	32.7	0	20.4	40.7	46	28.3	20.4	0	12.4	20.4	2	1	1	0	0	1	2	2	2	0
EG11153	>EG11153 rimM Factor required for 16S RNA processing	Peripheral inner membrane protein facing the cytoplasm	F1					2.27333	n.def	0.575674	n.def	n.def	n.def		0.816699	0.522495	0.923934	0.813253	0.754575	0.441885		8.2	20.9	20.9	21.4	13.7	8.2	8.2	8.2	15.4	15.4	15.4	26.9	13.7	20.9	33	8.2	19.8	19.8	1	3	3	3	2	1	1	1	2	2
EG11160	>EG11160 mscS Mechanosensitive channel protein, intermediate conductance	Integral Inner Membrane	B					0.285419	0.0454621	0.198562	0.00279245	1.02152	0.60893		0.852489	0.512552	1.44206	0.0291698	1.22934	0.462392		13.6	27.3	26.6	14	15.7	24.5	16.4	15.7	23.4	10.8	7	21.7	14	13.6	26.9	21.3	26.6	11.5	3	6	5	3	3	5	3	3	5	2
EG11164	>EG11164 ygiB DUF1190 family protein, function unknown	Peripheral inner membrane protein facing the cytoplasm	F1					n.def	n.def	n.def	n.def	n.def	n.def		n.def	n.def	n.def	n.def	n.def	n.def		0	0	0	0	0	0	0	0	0	0	0	7.6	7.6	0	0	7.6	0	0	0	0	0	0	0	0	0	0	0	0
EG11165	>EG11165 ygiC ATP-Grasp family ATPase, function unknown	Cytoplasmic	A					2.18646	0.124	1.33983	0.89163	1.28323	0.89029		0.392136	0.0672217	1.25052	0.454874	0.490373	0.120886		10.4	17.9	7.3	4.1	9.6	4.1	17.9	4.1	13.5	5.2	9.6	11.7	11.7	10.4	15.8	15.8	11.7	9.6	3	5	2	1	3	1	5	1	3	2
EG11171	>EG11171 tsaD tRNA(NNU) t(6)A37 threonylcarbamoyladenosine modification	Cytoplasmic	A					n.def	n.def	n.def	n.def	n.def	n.def		n.def	n.def	n.def	n.def	n.def	n.def		4.2	4.2	0	0	0	0	0	3.6	0	3.6	0	3.6	3.6	3.6	4.2	0	7.7	4.2	1	1	0	0	0	0	0	1	0	1
EG11176	>EG11176 garR Tartronate semialdehyde reductase, glycerate- or galactarate-inducible	Cytoplasmic	A					n.def	n.def	n.def	n.def	n.def	n.def		n.def	n.def	n.def	n.def	n.def	n.def		0	4.4	4.4	0	0	0	0	0	0	0	0	0	0	0	0	0	0	0	0	1	1	0	0	0	0	0	0	0
EG11177	>EG11177 truB tRNA pseudouridine(55) synthase	Cytoplasmic	A					0.333621	n.def	1.32756	n.def	0.231966	n.def		n.def	n.def	n.def	n.def	n.def	n.def		13.1	10.5	7	20.4	9.9	10.8	9.6	3.5	9.9	0	0	10.8	16.9	6.4	20.7	20.7	16.9	16.9	3	2	1	3	1	2	2	1	1	0
EG11178	>EG11178 rbfA Ribosome binding factor required for efficient processing of 16s rRNA	Peripheral inner membrane protein facing the cytoplasm	F1					0.936858	0.500133	1.67507	0.994963	0.894022	0.518187		1.20321	0.48236	0.599285	0.146718	0.721065	0.340411		45.9	48.9	32.3	48.9	42.9	24.1	48.9	35.3	56.4	42.9	48.9	48.9	32.3	35.3	24.8	48.9	24.8	35.3	5	5	4	5	5	3	5	4	6	5
EG11179	>EG11179 rimP Factor required for maturation of 30S ribosomal subunits	Peripheral inner membrane protein facing the cytoplasm	F1					4.4537	n.def	n.def	n.def	n.def	n.def		n.def	n.def	n.def	n.def	n.def	n.def		4.7	12	4.7	28	0	21.3	21.3	4.7	28.7	12	0	21.3	16.7	16.7	0	21.3	4.7	4.7	1	2	1	3	0	2	2	1	3	2
EG11180	>EG11180 mscL Mechanosensitive channel protein, high conductance	Integral Inner Membrane	B					n.def	n.def	n.def	n.def	4.25477	n.def		n.def	n.def	n.def	n.def	n.def	n.def		0	0	0	6.6	0	0	6.6	0	0	0	0	0	0	0	0	0	6.6	6.6	0	0	0	1	0	0	1	0	0	0
EG11183	>EG11183 damX Cell division protein, binds septal ring	Integral Inner Membrane	B		Yes			1.62882	0.516433	4.30714	0.0359137	2.15142	0.153226		1.4662	0.0557337	0.677022	0.0502045	0.992646	0.965793		2.8	16.1	10.5	10	5.1	10.7	10.7	14.5	5.1	17.3	2.1	10	2.1	5.1	5.1	5.1	5.1	5.1	1	5	3	3	3	3	4	5	3	5
EG11190	>EG11190 coaD Phosphopantetheine adenylyltransferase	Cytoplasmic	A					n.def	n.def	n.def	n.def	n.def	n.def		n.def	n.def	n.def	n.def	n.def	n.def		5.7	5.7	0	0	5.7	0	0	0	0	0	0	0	0	0	0	0	0	0	1	1	0	0	1	0	0	0	0	0
EG11191	>EG11191 slmA DNA-binding anti-FtsZ division inhibitor, dimeric	Nucleoid	N					n.def	n.def	13.3892	n.def	n.def	n.def		n.def	n.def	n.def	n.def	n.def	n.def		7.1	0	5.1	7.1	7.1	7.1	12.1	11.6	0	7.1	7.1	12.1	11.6	7.1	0	7.1	18.7	7.1	1	0	1	1	1	1	2	2	0	1
EG11192	>EG11192 yicC Function unknown, UPF0701 family	Cytoplasmic	A					1.12902	0.220257	0.798236	0.629048	1.43567	0.370061		0.934456	0.81148	0.958454	0.888694	0.895633	0.626774		21.6	14.3	12.5	19.2	22	18.8	22.3	18.8	17.1	25.8	17.8	22	22.3	18.5	17.8	18.5	25.8	24	5	3	3	5	5	4	5	4	4	6
EG11194	>EG11194 xanP Xanthine permease	Integral Inner Membrane	B					n.def	n.def	n.def	n.def	n.def	n.def		n.def	n.def	n.def	n.def	n.def	n.def		5.2	0	5.2	0	5.2	5.2	5.2	5.2	5.2	0	0	0	0	0	0	0	0	0	1	0	1	0	1	1	1	1	1	0
EG11195	>EG11195 yidA Erythrose 4-P and mannose 1-P phosphatase	Cytoplasmic	A					0.578381	0.463849	0.395055	0.218939	0.751974	0.823904		0.7954	0.669378	0.948233	0.938573	0.754225	0.69676		23	28.1	28.5	38.9	30.7	30.4	31.1	24.4	27.8	22.2	20.4	18.9	11.5	13.7	30.7	20.4	27	26.7	5	5	5	8	6	6	6	5	5	5
EG11197	>EG11197 yidC Membrane protein insertase	Integral Inner Membrane	B					1.17098	0.63964	0.320895	0.0841198	0.80478	0.44432		0.650527	0.321059	1.01746	0.957357	0.661883	0.0643584		15.3	17.9	18.4	17	25	15.7	25	19	11.3	21.4	17.3	12	12	7.1	17.9	14.8	12.2	24.8	5	6	6	5	8	4	7	6	4	6
EG11198	>EG11198 glmU Bifunctional glucosamine-1-phosphate acetyltransferase and N-acetylglucosamine-1-phosphate uridylyltransferase, hexameric	Peripheral inner membrane protein facing the cytoplasm	F1					1.13588	0.801243	0.580585	0.309044	1.01011	0.586269		0.804867	0.682213	0.853134	0.757471	0.68666	0.274982		10.1	8.1	12.7	12.1	12.1	10.1	9	12.1	12.7	4.6	16	20	12.1	12.7	16	12.1	18	15.4	3	2	4	4	4	3	3	5	4	2
EG11199	>EG11199 mioC Required for biotin synthase activity in vitro	Cytoplasmic	A					n.def	n.def	1.51573	n.def	0.44535	n.def		n.def	n.def	n.def	n.def	n.def	n.def		6.1	0	0	16.3	16.3	16.3	16.3	0	16.3	0	0	16.3	16.3	0	16.3	0	0	16.3	1	0	0	1	1	1	1	0	1	0
EG11202	>EG11202 yigB FMN phosphatase	Cytoplasmic	A					1.45638	n.def	n.def	n.def	0.251683	n.def		n.def	n.def	n.def	n.def	n.def	n.def		0	18.9	0	10.1	0	5	23.9	0	15.1	5	0	3.8	0	0	0	0	0	5	0	2	0	1	0	1	3	0	2	1
EG11203	>EG11203 yihA GTP-binding protein required for normal cell division	Peripheral inner membrane protein facing the cytoplasm	F1					1.5823	n.def	n.def	n.def	n.def	n.def		n.def	n.def	n.def	n.def	n.def	n.def		11.4	6.7	0	8.6	0	0	8.6	6.2	15.2	5.2	5.2	8.6	8.6	0	0	0	6.2	0	2	1	0	1	0	0	1	1	2	1
EG11205	>EG11205 murB UDP-N-acetylenolpyruvoylglucosamine reductase, FAD-binding	Cytoplasmic	A					n.def	n.def	n.def	n.def	n.def	n.def		n.def	n.def	n.def	n.def	n.def	n.def		0	0	0	0	0	0	3.8	0	3.8	0	0	3.8	3.8	3.8	0	0	0	0	0	0	0	0	0	0	1	0	1	0
EG11212	>EG11212 nsrR Nitric oxide-sensitive repressor	Nucleoid	N					1.71471	n.def	n.def	n.def	n.def	n.def		n.def	n.def	n.def	n.def	n.def	n.def		10.6	29.1	10.6	8.5	0	19.1	10.6	19.1	0	10.6	10.6	0	0	0	0	10.6	0	0	1	2	1	1	0	2	1	2	0	1
EG11214	>EG11214 yjjA Predicted secreted protein, function unknown	Periplasmic	G					n.def	n.def	n.def	n.def	n.def	n.def		n.def	n.def	n.def	n.def	n.def	n.def		0	0	0	0	0	0	0	11	0	0	0	0	0	0	0	0	0	0	0	0	0	0	0	0	0	1	0	0
EG11217	>EG11217 creA Predicted secreted protein, function unknown	Periplasmic	G					10.8362	n.def	0.781136	n.def	n.def	n.def		n.def	n.def	n.def	n.def	n.def	n.def		0	7	7	7	7	0	0	0	14.6	7	0	14.6	7.6	7	14.6	0	7	7	0	1	1	1	1	0	0	0	2	1
EG11221	>EG11221 zwf Glucose-6-phosphate 1-dehydrogenase	Cytoplasmic	A			Yes		3.39671	0.103651	2.92935	0.0601874	7.30724	0.00138468		0.757832	0.713404	1.22266	0.789202	0.926571	0.775035		26.1	38.3	36.9	28.1	39.7	24	32.6	25.3	38.1	37.7	26.5	27.3	24.6	28.3	29.3	23.8	29.5	21.8	13	18	17	12	18	11	15	12	17	18
EG11223	>EG11223 argH Argininosuccinate lyase	Peripheral inner membrane protein facing the cytoplasm	F1					1.14233	0.920373	2.05938	0.429243	1.81244	0.205658		1.10362	0.704569	0.76877	0.476632	0.848433	0.529935		15.5	28.2	21.4	35	15.1	18.8	24.7	23.4	24.9	20.4	25.2	27.4	34.1	23	27.6	21.9	27.1	25.8	6	8	7	10	5	6	8	7	8	6
EG11225	>EG11225 dcuA C4-dicarboxylate transporter, anaerobic	Integral Inner Membrane	B					n.def	n.def	n.def	n.def	n.def	n.def		n.def	n.def	n.def	n.def	n.def	n.def		0	0	0	0	0	0	1.8	1.8	0	0	0	0	0	0	0	1.8	0	0	0	0	0	0	0	0	1	1	0	0
EG11226	>EG11226 leuA alpha-Isopropylmalate synthase	Cytoplasmic	A			Yes		3.58511	0.077445	1.9775	0.0869547	3.31139	0.0127731		0.643118	0.225041	0.648857	0.0789095	0.417292	0.0120963		16.8	23.5	17.4	12.2	14	16.8	28.5	17.8	13.8	12.2	6.7	23.3	19.3	8.2	12.4	13.2	13.8	12.8	7	9	7	5	6	6	10	6	6	5
EG11235	>EG11235 rhlE ATP-dependent RNA helicase, in RNA degradasome	Peripheral inner membrane protein facing the cytoplasm	F1					n.def	n.def	n.def	n.def	0.453792	n.def		n.def	n.def	n.def	n.def	n.def	n.def		5.7	0	0	0	2.9	2.9	2.9	2.9	2.9	0	0	8.4	0	0	2.9	5.3	0	0	2	0	0	0	1	1	1	1	1	0
EG11236	>EG11236 yahA c-di-GMP-specific phosphodiesterase, PDE-A	Nucleoid	N					n.def	n.def	0.472958	0.543528	0.903443	n.def		n.def	n.def	0.955062	0.906883	n.def	n.def		3	5.8	3	18.2	5.8	8.6	18.8	5.5	18.2	5.8	3	3	8.6	2.8	5.8	8.6	5.8	3	1	2	1	4	2	2	4	2	4	2
EG11244	>EG11244 yggE Oxidative stress defense, DUF541 family, mechanism unknown	Periplasmic	G					n.def	n.def	n.def	n.def	0.189536	n.def		n.def	n.def	n.def	n.def	n.def	n.def		0	0	0	0	0	0	6.1	0	10.2	10.2	0	16.7	6.1	10.2	6.1	15.4	6.1	6.1	0	0	0	0	0	0	1	0	2	2
EG11246	>EG11246 uspE Stress-induced protein	Cytoplasmic	A					n.def	n.def	n.def	n.def	n.def	n.def		n.def	n.def	n.def	n.def	n.def	n.def		0	0	0	8.2	3.8	7.6	3.8	3.8	0	3.8	0	0	0	3.8	0	3.8	0	0	0	0	0	1	1	2	1	1	0	1
EG11251	>EG11251 ychA Salmonella sirB1 ortholog, function unknown	Cytoplasmic	A					n.def	n.def	n.def	n.def	n.def	n.def		n.def	n.def	n.def	n.def	n.def	n.def		0	10	0	0	0	0	0	0	0	0	0	0	0	0	0	0	0	0	0	2	0	0	0	0	0	0	0	0
EG11252	>EG11252 mukE Chromosome condensin MukBEF, MukE localization factor	Nucleoid, Peripheral inner membrane protein facing the cytoplasm	N,F1					n.def	n.def	n.def	n.def	0.418351	n.def		1.29866	0.389031	n.def	n.def	n.def	n.def		16.2	10.3	17.9	7.7	17.9	23.1	10.3	7.7	17.9	0	0	7.7	0	0	0	0	0	10.3	3	1	2	1	2	3	1	1	2	0
EG11254	>EG11254 rlmH 23S rRNA m(3)Psi1915 pseudouridine methyltransferase	Cytoplasmic	A					n.def	n.def	n.def	n.def	0.417204	n.def		n.def	n.def	n.def	n.def	n.def	n.def		8.4	0	0	0	8.4	0	0	0	8.4	0	8.4	8.4	0	5.8	0	8.4	5.8	0	1	0	0	0	1	0	0	0	1	0
EG11255	>EG11255 rsfS Ribosomal silencing factor	Cytoplasmic	A					0.351735	n.def	1.00223	0.809311	0.559284	0.214718		n.def	n.def	0.514475	0.107375	n.def	n.def		8.6	38.1	21.9	38.1	26.7	33.3	38.1	33.3	38.1	24.8	13.3	38.1	26.7	24.8	13.3	24.8	26.7	21.9	1	2	2	4	2	3	4	3	4	2
EG11259	>EG11259 rnr Exoribonuclease R, RNase R	Peripheral inner membrane protein facing the cytoplasm	F1					1.75362	n.def	1.23541	0.641082	1.22028	n.def		n.def	n.def	n.def	n.def	n.def	n.def		0	3.4	4.4	7.4	1.6	9	4.9	1.6	4.8	2.5	3.6	7.5	4.1	6.2	7.4	9.7	6.3	7	0	2	3	4	1	5	3	1	3	2
EG11261	>EG11261 nfsA Nitroreductase A	Cytoplasmic	A					2.06782	0.3739	0.934924	n.def	1.59265	0.110351		n.def	n.def	n.def	n.def	1.09745	0.902439		19.2	25	25	20	19.2	19.2	25	12.1	17.9	19.2	14.2	25	17.9	12.1	19.2	25	25	25	3	4	4	4	3	3	4	2	3	3
EG11265	>EG11265 cmk Cytidylate kinase	Cytoplasmic	A			Yes		2.36529	0.12148	1.78705	n.def	FtsH only	FtsH only		n.def	n.def	n.def	n.def	0.676689	0.479758		23.3	13.2	14.5	20.3	0	13.2	20.3	15.4	14.5	8.8	12.8	14.5	28.2	20.3	17.2	7.5	17.2	7	4	2	2	3	0	2	3	3	2	2
EG11266	>EG11266 waaH LPS(HepIII)-glucuronic acid glycosyltransferase	Cytoplasmic	A					n.def	n.def	n.def	n.def	n.def	n.def		n.def	n.def	n.def	n.def	n.def	n.def		8.1	3.8	8.1	0	3.8	3.8	0	0	0	0	0	0	0	0	0	0	0	0	2	1	2	0	1	1	0	0	0	0
EG11268	>EG11268 fmt Methionyl-tRNA formyltransferase	Cytoplasmic	A	Yes				FtsH only	FtsH only	4.30143	n.def	0.591219	n.def		n.def	n.def	n.def	n.def	n.def	n.def		17.1	17.8	17.1	0	7	7	0	0	6.3	3.8	3.8	0	6.3	10.2	13.3	10.2	10.8	17.1	3	3	3	0	1	1	0	0	1	1
EG11284	>EG11284 fabZ 3R-hydroxymyristoyl acyl carrier protein (ACP) dehydratase	Peripheral inner membrane protein facing the cytoplasm	F1					1.05036	0.932764	0.790811	0.440905	1.3226	0.247265		1.0908	0.848975	1.04532	0.908461	1.14024	0.722884		21.2	45	32.5	45	32.5	32.5	45	32.5	27.2	32.5	21.9	32.5	32.5	16.6	45	21.9	32.5	32.5	3	5	4	5	4	5	5	5	3	4
EG11286	>EG11286 argE Acetylornithine deacetylase	Peripheral inner membrane protein facing the cytoplasm	F1		Yes	Yes		3.67837	0.051757	5.59946	1.85294e-05	5.03257	0.0030848		0.925751	0.315649	0.522589	0.0334654	0.483788	0.0280447		25.1	29.2	17.5	25.1	22.7	29.8	28.7	19.6	12	11.7	5.7	9.1	5.2	12	9.1	9.1	9.1	14.1	8	9	6	8	7	8	8	6	4	4
EG11288	>EG11288 mak Cryptic manno(fructo)kinase	Cytoplasmic	A					n.def	n.def	n.def	n.def	n.def	n.def		n.def	n.def	n.def	n.def	n.def	n.def		11.3	0	11.3	0	0	0	8.3	6.3	0	5	0	0	5	5	3.3	0	0	5	2	0	2	0	0	0	1	1	0	1
EG11293	>EG11293 lolB OM lipoprotein required for localization of lipoproteins	Outer Membrane Lipoprotein	I					n.def	n.def	4.02916	n.def	2.76011	n.def		n.def	n.def	n.def	n.def	n.def	n.def		0	0	0	0	0	14	8.2	14	0	0	0	5.3	5.8	11.1	5.8	5.8	0	0	0	0	0	0	0	2	1	2	0	0
EG11295	>EG11295 wzzE Enterobacterial common antigen ECA chain length determination	Integral Inner Membrane	B					1.24564	0.52609	2.19206	n.def	1.01986	0.796773		1.14734	0.280678	0.583903	0.113038	0.669935	0.170704		4	4	4	4	4	18.7	4	12.4	4	4	4	4	10.3	0	4	9.8	4	4	1	1	1	1	1	4	1	3	1	1
EG11296	>EG11296 radA Sensitivity to gamma and UV radiation	Peripheral inner membrane protein facing the cytoplasm	F1	Yes		Yes		FtsH only	FtsH only	9.30757	n.def	FtsH only	FtsH only		n.def	n.def	n.def	n.def	1.10807	0.685181		7.4	7	12.4	0	16.5	6.7	14.1	7.4	11.3	4.8	4.8	0	0	2.6	0	0	0	0	2	2	4	0	5	2	4	3	3	1
EG11297	>EG11297 dsbA Thiol:disulfide interchange protein, periplasmic	Periplasmic	G					n.def	n.def	1.65157	n.def	n.def	n.def		n.def	n.def	n.def	n.def	n.def	n.def		12	5.8	7.2	29.8	5.3	23.1	24.5	17.8	12.5	24.5	17.8	24.5	24.5	12	17.8	17.8	23.1	23.1	1	1	1	4	1	3	3	2	2	3
EG11298	>EG11298 yhdE Maf-like protein, function unknown	Cytoplasmic	A					n.def	n.def	1.27059	n.def	n.def	n.def		n.def	n.def	n.def	n.def	n.def	n.def		6.1	21.8	6.1	6.1	6.1	11.7	6.1	9.6	9.6	9.6	0	11.7	6.1	11.7	6.1	6.1	6.1	6.1	1	2	1	1	1	2	1	1	1	1
EG11299	>EG11299 rng Endoribonuclease G involved in 16S rRNA processing	Cytoplasmic	A					n.def	n.def	n.def	n.def	1.16145	0.922675		n.def	n.def	n.def	n.def	n.def	n.def		0	5.9	3.9	0	0	3.9	9.2	2.9	5.9	0	2.9	0	5.7	6.7	2.9	3.9	3.9	3.9	0	2	1	0	0	1	3	1	2	0
EG11306	>EG11306 lipA Lipoyl synthase, iron-sulfur protein	Cytoplasmic	A	Yes	Yes			2.54456	0.0356665	2.95105	0.00101002	1.93322	0.0266801		0.822715	0.0656317	0.540744	0.0206982	0.444879	0.00940037		21.5	34.6	29.6	26.2	19.9	25.2	36.4	12.5	19.9	17.1	34.6	27.4	24	12.5	27.4	18.1	19.9	19.9	6	9	8	7	5	6	9	4	5	5
EG11314	>EG11314 purB Adenylosuccinate lyase, purine synthesis	Peripheral inner membrane protein facing the cytoplasm	F1					0.386431	0.183365	1.4906	0.706311	2.21299	0.339627		1.57924	0.48696	0.93189	0.821439	1.47168	0.519733		23.9	28.7	33.1	24.1	29.8	25.7	24.8	23.2	24.6	22.1	36.8	31.8	33.6	19.7	31.4	34.9	31.6	31.6	9	12	14	9	13	11	10	9	9	10
EG11315	>EG11315 acuI Putative acryloyl-CoA reductase	Cytoplasmic	A					0.357047	n.def	0.667704	n.def	0.301846	n.def		n.def	n.def	n.def	n.def	n.def	n.def		10.8	6.8	6.8	6.8	14.5	10.5	6.8	4.6	15.4	12.3	0	10.5	6.8	15.4	10.8	11.4	10.8	10.8	2	1	1	1	3	2	1	1	3	3
EG11317	>EG11317 fabD Malonyl-CoA-acyl carrier protein transacylase	Cytoplasmic	A	Yes				8.4069	0.0168558	4.44646	0.431251	0.693094	0.477492		0.407528	0.19879	0.788071	0.660642	0.321161	0.118455		33.3	34	33.3	33	29.8	30.1	24.6	30.1	33.3	29.8	34	29.8	29.8	26.9	26.5	21.7	30.1	29.8	7	8	7	6	5	6	5	6	7	5
EG11318	>EG11318 fabG beta-Ketoacyl-ACP reductase	Peripheral inner membrane protein facing the cytoplasm	F1					1.82585	0.0132924	1.31535	0.365747	1.34211	0.439326		0.880914	0.530846	0.803493	0.199761	0.707808	0.0809504		60.2	60.2	49.2	63.5	63.5	55.7	43.4	60.2	60.2	37.7	60.2	52.5	60.2	53.3	53.3	52.5	60.2	60.2	9	9	7	10	10	9	7	9	9	6
EG11319	>EG11319 galU Glucose-1-P uridylyltransferase	Cytoplasmic	A		Yes	Yes		2.56116	0.0589602	3.00874	0.0228851	3.24988	0.00694015		1.07161	0.433253	0.519657	0.000407612	0.556872	0.000121197		14.9	15.6	15.6	11.3	11.3	11.3	11.3	11.3	11.3	7.3	11.3	11.3	15.6	11.3	15.6	11.3	15.6	15.6	3	3	3	2	2	2	2	2	2	2
EG11321	>EG11321 ribD Bifunctional enzyme for second and third steps in riboflavin biosynthesis	Cytoplasmic	A					n.def	n.def	n.def	n.def	n.def	n.def		n.def	n.def	0.80071	0.721877	n.def	n.def		4.1	4.1	0	4.1	4.1	4.1	4.1	4.1	4.1	3.3	4.1	0	0	0	0	0	0	0	1	1	0	1	1	1	1	1	1	1
EG11322	>EG11322 ribE Lumazine (6,7-dimethyl-8-ribityllumazine) synthase	Peripheral inner membrane protein facing the cytoplasm	F1					1.39793	0.442853	1.25533	0.805171	1.19754	0.815229		1.00864	0.954887	0.781483	0.0623281	0.788235	0.0810063		43.6	64.1	62.2	62.2	43.6	31.4	43.6	31.4	59	31.4	50	62.2	43.6	31.4	62.2	62.2	43.6	62.2	5	7	6	7	5	4	6	4	6	4
EG11323	>EG11323 ygfB UPF0149 family protein, function unknown	Cytoplasmic	A					2.63241	n.def	4.19342	0.00537212	3.98986	n.def		n.def	n.def	n.def	n.def	n.def	n.def		8.3	0	6.8	6.8	8.3	6.8	0	6.8	6.8	6.8	0	6.8	6.8	6.8	6.8	0	6.8	6.8	1	0	1	1	2	1	0	1	1	1
EG11325	>EG11325 acnA Aconitase A, stationary phase induced	Cytoplasmic	A		Yes	Yes		1.66506	n.def	FtsH only	FtsH only	FtsH only	FtsH only		n.def	n.def	0.586808	0.0859056	n.def	n.def		0	11.3	8.3	8.8	4.3	7	7.7	5.8	8.6	1.5	5.3	6.3	2.4	3.3	7.6	3	8.1	6.1	0	6	4	5	2	3	4	3	5	1
EG11326	>EG11326 codA Cytosine/isoguanine deaminase	Cytoplasmic	A		Yes			1.3981	0.839262	5.29036	0.0116048	0.989442	0.643347		3.32357	0.395168	0.257435	0.020024	0.855603	0.832703		15.2	16.9	19.7	23.4	15.2	19.7	20.1	6.1	19.7	8.7	15.2	19.7	11	11	14.8	14.3	14.3	15.2	4	5	5	6	4	5	5	2	5	3
EG11327	>EG11327 codB Cytosine transport	Integral Inner Membrane	B					n.def	n.def	n.def	n.def	n.def	n.def		n.def	n.def	n.def	n.def	n.def	n.def		0	3.8	0	0	0	0	0	0	0	0	0	0	0	0	0	3.8	0	3.8	0	1	0	0	0	0	0	0	0	0
EG11328	>EG11328 fdx Ferredoxin, an iron-sulfur protein	Cytoplasmic	A			Yes		1.79856	0.33671	1.25141	n.def	FtsH only	FtsH only		n.def	n.def	n.def	n.def	0.204253	0.0366817		27.9	27.9	27.9	17.1	27.9	27.9	27.9	27.9	27.9	36	27.9	27.9	36	36	17.1	27.9	25.2	27.9	2	2	2	1	2	2	2	2	2	3
EG11331	>EG11331 ribA GTP cyclohydrolase II, riboflavin biosynthesis	Cytoplasmic	A					2.70703	0.134355	1.7192	0.0432993	2.44262	0.0574543		0.784246	0.48511	0.748113	0.424814	0.586704	0.119787		14.8	7.7	11.2	11.2	11.2	24	7.7	11.2	11.2	11.2	14.8	14.8	10.7	14.8	14.8	7.1	14.8	11.2	4	2	3	3	3	4	2	3	3	3
EG11332	>EG11332 upp Uracil phosphoribosyltransferase	Cytoplasmic	A	Yes	Yes	Yes		2.55592	0.0495294	3.44439	0.00274441	2.39127	0.0282182		1.03812	0.849098	0.657874	0.111454	0.682949	0.199378		48.6	40.9	39.4	70.7	47.1	51.4	74.5	59.1	59.1	26	23.6	47.6	55.3	36.5	51.4	47.6	51.4	55.3	8	6	5	8	6	7	9	8	8	4
EG11333	>EG11333 visC Putative FAD-dependent oxidoreductase, function unknown	Inner Membrane Lipoprotein	E					n.def	n.def	n.def	n.def	n.def	n.def		n.def	n.def	n.def	n.def	n.def	n.def		0	0	2.2	0	0	0	2.2	0	2.2	0	0	0	0	0	2.5	0	4.5	0	0	0	1	0	0	0	1	0	1	0
EG11338	>EG11338 msyB In multicopy restores growth and protein export functions of secY and secA mutants	Cytoplasmic	A					n.def	n.def	n.def	n.def	n.def	n.def		n.def	n.def	n.def	n.def	n.def	n.def		0	0	0	0	0	0	0	0	19.4	0	0	0	0	0	0	0	0	0	0	0	0	0	0	0	0	0	1	0
EG11339	>EG11339 waaG LPS core biosynthesis	Peripheral inner membrane protein facing the cytoplasm	F1					n.def	n.def	n.def	n.def	n.def	n.def		n.def	n.def	n.def	n.def	n.def	n.def		0	0	1.9	0	0	0	0	0	0	2.4	0	0	2.4	2.4	0	0	2.4	0	0	0	1	0	0	0	0	0	0	1
EG11344	>EG11344 mnmA tRNA(Gln,Lys,Glu) U34 2-thiouridylase	Cytoplasmic	A					0.46479	n.def	0.53361	n.def	0.174767	n.def		n.def	n.def	n.def	n.def	n.def	n.def		0	3	3	0	3	0	6	3	3	3	3	9	3	9	6	3	6	3	0	1	1	0	1	0	1	1	1	1
EG11345	>EG11345 hflD Downregulates lambda lysogenization	Peripheral inner membrane protein facing the cytoplasm	F1					3.75272	n.def	n.def	n.def	n.def	n.def		n.def	n.def	n.def	n.def	n.def	n.def		11.7	8.5	3.8	8.5	8.5	15.5	15.5	8.5	18.8	3.8	13.1	12.2	12.2	3.8	3.8	19.2	3.8	7	2	1	1	1	1	2	2	1	3	1
EG11354	>EG11354 emrA EmrAB-TolC multidrug resistance pump	Integral Inner Membrane	B					1.31836	0.414089	1.77558	0.271489	0.738039	0.297399		1.71336	0.239202	0.581945	0.151868	0.997079	0.992304		10.3	17.4	10.3	15.6	10.3	7.4	10.3	17.4	10.3	12.1	11.3	10.3	12.8	10.3	17.4	10.3	10.3	13.8	3	4	3	5	3	3	3	4	3	3
EG11358	>EG11358 murA UDP-N-acetylglucosamine enoylpyruvyl transferase	Cytoplasmic	A					2.92711	0.226628	2.72403	0.112846	1.5233	0.0305222		0.723587	0.532094	0.775083	0.511599	0.56084	0.106512		20.3	14.6	16.9	15	17.9	22	18.1	16.7	16.7	11.2	15.3	22	18.6	14.6	17.4	18.6	16	17.4	6	4	6	5	6	8	6	6	6	4
EG11362	>EG11362 gluQ Glutamyl-queuosine tRNA(Asp) synthase	Cytoplasmic	A	Yes				FtsH only	FtsH only	n.def	n.def	9.6791	n.def		2.47135	0.212903	n.def	n.def	n.def	n.def		7.5	13	8.8	10.7	3.2	8.8	10.4	2.6	5.8	7.1	0	0	0	0	0	3.2	0	0	2	3	2	2	1	2	3	1	2	2
EG11366	>EG11366 rob Right oriC-binding transcriptional activator, AraC family	Nucleoid	N			Yes		n.def	n.def	1.51671	n.def	FtsH only	FtsH only		0.922804	0.886377	1.61835	0.189405	1.49342	0.559101		11.1	3.5	4.2	14.5	6.9	3.5	14.5	6.9	6.9	0	0	0	0	3.5	3.5	6.9	0	0	3	1	1	3	2	1	4	2	2	0
EG11368	>EG11368 menB 1,4-Dihydroxy-2-naphthoyl-CoA (DHNA-CoA) synthase	Cytoplasmic	A			Yes		3.23004	n.def	0.959626	0.96546	FtsH only	FtsH only		n.def	n.def	0.975731	0.964131	n.def	n.def		11.2	12.3	3.2	11.6	13.7	13.7	7	16.8	12.3	0	8.4	14	12.3	12.6	17.9	6.7	5.6	14.7	3	3	1	3	3	3	2	4	3	0
EG11369	>EG11369 ubiC Chorismate--pyruvate lyase	Cytoplasmic	A					n.def	n.def	n.def	n.def	n.def	n.def		n.def	n.def	n.def	n.def	n.def	n.def		21.2	21.8	0	0	0	0	11.5	0	0	0	0	0	10.3	0	0	0	0	0	2	2	0	0	0	0	1	0	0	0
EG11373	>EG11373 mltF Membrane-bound lytic transglycosylase F, murein hydrolase	Peripheral outer membrane protein facing the periplasm	F3					n.def	n.def	n.def	n.def	n.def	n.def		n.def	n.def	n.def	n.def	n.def	n.def		0	0	0	0	0	0	0	0	0	1.9	2.3	1.9	1.9	1.9	1.9	1.9	1.9	1.9	0	0	0	0	0	0	0	0	0	1
EG11375	>EG11375 folE GTP cyclohydrolase I	Cytoplasmic	A	Yes	Yes	Yes		3.85349	0.00893996	3.10254	0.00245949	4.01219	6.40006e-05		0.772945	0.441151	0.775941	0.338719	0.59976	0.0690773		22.5	27.9	22.5	41.4	34.2	23.4	37.8	27	29.7	19.4	33.3	33.3	33.3	12.2	19.8	27	19.8	23.9	4	5	4	8	7	4	7	5	5	4
EG11376	>EG11376 ftsP Septal ring component that protects the divisome from stress	Periplasmic	G					n.def	n.def	n.def	n.def	n.def	n.def		n.def	n.def	n.def	n.def	n.def	n.def		2.6	0	2.6	0	0	0	4.3	0	0	5.1	5.1	2.6	0	5.1	0	2.6	2.6	2.6	1	0	1	0	0	0	1	0	0	2
EG11383	>EG11383 elbB Involved in isoprenoid biosynthesis	Cytoplasmic	A		Yes			0.672263	n.def	FtsH only	FtsH only	0.972934	n.def		n.def	n.def	n.def	n.def	n.def	n.def		25.8	3.2	15.7	25.8	25.8	25.8	34.1	3.2	24	3.2	15.7	25.8	12.4	0	15.7	22.6	25.8	25.8	3	1	2	3	3	3	4	1	3	1
EG11384	>EG11384 ahpC Alkyl hydroperoxide reductase, subunit C	Peripheral inner membrane protein facing the cytoplasm	F1					1.7842	0.730083	0.579837	0.00198009	1.11931	0.689033		1.00182	0.994624	0.937091	0.852941	0.938798	0.883556		44.4	59.4	59.4	59.4	59.4	43.9	58.8	57.8	59.4	46	59.4	59.4	58.8	58.3	59.4	58.3	58.8	59.4	9	9	9	10	9	6	8	8	10	8
EG11385	>EG11385 ahpF Alkyl hydroperoxide reductase, subunit F	Peripheral inner membrane protein facing the cytoplasm	F1	Yes	Yes	Yes		3.63855	0.0145813	3.86471	0.000825843	5.51512	0.00357668		0.93395	0.804246	1.16379	0.632376	1.08692	0.546349		33.8	40.3	36.5	34.4	32.1	35.9	43.4	31.7	35.9	18	30.9	22.5	29.6	22.1	32.6	34	26.9	31.7	12	15	14	12	11	13	16	12	13	8
EG11390	>EG11390 uspA Global regulatory gene for stress response	Peripheral inner membrane protein facing the cytoplasm	F1					2.12945	n.def	1.13299	n.def	5.11923	n.def		n.def	n.def	n.def	n.def	n.def	n.def		0	59.7	0	59.7	0	0	59.7	18.8	32.6	0	27.1	18.8	41	0	59.7	0	59.7	0	0	3	0	3	0	0	3	1	2	0
EG11391	>EG11391 osmY Osmotically induced periplasmic protein, function unknown	Periplasmic, Extra-cellular	G,X					10.9424	n.def	2.30623	n.def	0.280487	0.388451		n.def	n.def	n.def	n.def	n.def	n.def		5	0	5	14.4	5	11.4	5	5	5	30.3	25.4	5	0	22.4	5	5	5	5	1	0	1	2	1	2	1	1	1	4
EG11392	>EG11392 nhaB Na+/H+ antiporter 2, weakly pH-dependent	Integral Inner Membrane	B					4.43234	n.def	n.def	n.def	1.05827	n.def		n.def	n.def	n.def	n.def	n.def	n.def		0	1.4	1.4	0	1.4	6.2	0	2.1	0	3.5	3.5	4.1	0	0	3.3	2.1	2.1	2.1	0	1	1	0	1	3	0	1	0	2
EG11394	>EG11394 fabR Transcriptional repressor of fabA and fabB	Nucleoid	N					n.def	n.def	n.def	n.def	0.615566	n.def		n.def	n.def	n.def	n.def	n.def	n.def		0	0	0	0	0	8.4	0	6.5	0	0	0	0	0	0	0	6.5	0	0	0	0	0	0	0	1	0	1	0	0
EG11396	>EG11396 ubiD 3-octaprenyl-4-hydroxybenzoate carboxylyase	Peripheral inner membrane protein facing the cytoplasm	F1					3.11857	n.def	1.86165	0.165502	2.84092	0.0221938		0.978685	0.955283	1.1457	0.745229	1.12128	0.364863		5	5	7.4	5	7.8	7.8	11.3	2.8	9.3	0	7.8	7.8	7.8	4.2	9.3	7.8	7.4	10.3	1	1	2	1	2	2	3	1	3	0
EG11402	>EG11402 treC Trehalose-6-phosphate hydrolase, osmoprotectant	Peripheral inner membrane protein facing the cytoplasm	F1					n.def	n.def	n.def	n.def	n.def	n.def		n.def	n.def	n.def	n.def	n.def	n.def		4.2	8.3	10.7	4.2	8	6.4	10.5	8.2	6.4	6.5	0	0	0	0	0	0	0	0	2	4	5	2	4	3	5	4	3	3
EG11403	>EG11403 ppx Exopolyphosphatase	Peripheral inner membrane protein facing the cytoplasm	F1	Yes		Yes		FtsH only	FtsH only	5.5259	n.def	FtsH only	FtsH only		n.def	n.def	n.def	n.def	1.06845	0.805285		4.9	8.2	6.8	3.1	4.9	4.9	7.2	5.3	5.1	1.8	0	4.1	4.3	1.8	3.7	2.1	3.7	3.7	2	3	3	1	2	2	3	2	2	1
EG11404	>EG11404 ychF Catalase inhibitor protein	Cytoplasmic	A					2.8498	0.0550726	1.98649	0.0174525	1.83356	0.504405		1.4381	0.491398	0.445137	0.00750558	0.640151	0.263142		20.4	28.4	24.8	20.7	24.8	16.8	24.8	12.7	28.4	16.8	19.6	24	17.9	21.2	17.9	23.4	17.9	17.9	6	8	7	6	7	5	7	4	8	5
EG11405	>EG11405 cydD Glutathione, cysteine export permease/ATP-binding protein	Integral Inner Membrane	B					n.def	n.def	n.def	n.def	n.def	n.def		n.def	n.def	n.def	n.def	n.def	n.def		2.6	5.6	5.6	3.1	2.6	0	0	0	0	1.5	2.6	2.6	0	2.6	0	0	2.6	0	1	2	2	1	1	0	0	0	0	1
EG11406	>EG11406 ribC Riboflavin synthase	Cytoplasmic	A					1.3006	0.949245	1.24449	0.937356	0.834882	0.625976		2.19032	0.208173	0.513855	0.274427	1.12551	0.82872		13.6	13.6	8.5	8.5	13.6	13.6	13.6	13.6	13.6	18.8	8.5	13.6	13.6	13.6	8.5	13.6	13.6	17.4	2	2	1	1	2	2	2	2	2	3
EG11407	>EG11407 dadA D-amino acid dehydrogenase	Peripheral inner membrane protein facing the cytoplasm	F1	Yes		Yes		FtsH only	FtsH only	2.16799	0.168414	5.84701	0.00782401		0.650442	0.573622	1.98481	0.418797	1.29101	0.515584		16.9	15.5	23.1	8.3	23.1	21.1	23.1	21.1	19.9	2.5	17.4	4.4	2.5	4.6	12.3	8.8	5.8	7.9	5	5	7	2	7	6	7	6	6	1
EG11408	>EG11408 dadX Alanine racemase	Peripheral inner membrane protein facing the cytoplasm	F1					n.def	n.def	n.def	n.def	n.def	n.def		n.def	n.def	n.def	n.def	n.def	n.def		3.9	0	6.7	0	0	9	2.2	2.2	2.2	3.9	3.9	3.9	3.9	10.1	10.1	3.9	3.9	3.9	1	0	1	0	0	2	1	1	1	1
EG11409	>EG11409 lpxK Lipid A 4 kinase	Integral Inner Membrane	B					n.def	n.def	n.def	n.def	n.def	n.def		n.def	n.def	n.def	n.def	n.def	n.def		0	0	0	0	0	0	0	0	0	4.3	0	4.3	4.3	0	0	0	4.3	0	0	0	0	0	0	0	0	0	0	1
EG11410	>EG11410 yjgA Ribosome-associated protein, UPF0307 family, function unknown	Peripheral inner membrane protein facing the cytoplasm	F1					0.549472	0.102467	1.15486	n.def	0.871348	0.52656		n.def	n.def	n.def	n.def	0.978574	0.903599		12.6	22.4	16.9	22.4	10.9	10.9	10.9	5.5	22.4	5.5	10.9	10.9	22.4	5.5	22.4	10.9	22.4	22.4	2	3	2	3	2	2	2	1	3	1
EG11411	>EG11411 glnD Bifunctional uridylyltransferase/uridylyl-removing enzyme	Cytoplasmic	A					n.def	n.def	n.def	n.def	n.def	n.def		n.def	n.def	n.def	n.def	n.def	n.def		0	0	1.5	0	0	2.5	2.5	0	0	0	0	0	0	1.5	0	0	0	0	0	0	1	0	0	2	2	0	0	0
EG11413	>EG11413 holC DNA polymerase III, chi subunit	Nucleoid	N					n.def	n.def	n.def	n.def	n.def	n.def		n.def	n.def	n.def	n.def	n.def	n.def		0	0	0	0	0	0	0	0	0	0	0	10.9	0	0	0	0	0	0	0	0	0	0	0	0	0	0	0	0
EG11414	>EG11414 holD DNA polymerase, psi subunit, clamp loader complex subunit	Nucleoid	N					n.def	n.def	n.def	n.def	n.def	n.def		n.def	n.def	n.def	n.def	n.def	n.def		32.1	0	0	0	0	0	0	0	0	0	0	0	0	0	0	0	0	0	2	0	0	0	0	0	0	0	0	0
EG11415	>EG11415 dps Stress-induced Fe-binding and storage protein	Nucleoid, Peripheral inner membrane protein facing the cytoplasm	N,F1					1.25991	0.363487	1.63755	0.289217	1.30582	0.979925		0.770902	0.351353	0.777178	0.0468129	0.599127	0.0874872		45.5	52.7	40.1	29.9	31.7	29.3	38.3	21	32.9	16.2	40.7	57.5	53.9	36.5	49.7	57.5	49.1	27.5	7	7	5	4	4	4	5	3	4	2
EG11417	>EG11417 nrdD Ribonucleoside-triphosphate reductase	Cytoplasmic	A					n.def	n.def	n.def	n.def	n.def	n.def		n.def	n.def	n.def	n.def	n.def	n.def		0	0	2.1	0	2.1	6.9	2.1	5.5	3.4	0	0	0	0	0	0	0	0	0	0	0	1	0	1	3	1	2	2	0
EG11418	>EG11418 dcd dCTP deaminase	Cytoplasmic	A					n.def	n.def	n.def	n.def	n.def	n.def		n.def	n.def	n.def	n.def	n.def	n.def		6.7	6.7	6.7	6.7	6.7	6.7	6.7	6.7	6.7	6.7	6.7	6.7	6.7	6.7	11.9	6.7	11.9	11.9	1	1	1	1	1	1	1	1	1	1
EG11422	>EG11422 inaA Protein induced by acid, function unknown	Cytoplasmic	A					0.320887	n.def	n.def	n.def	n.def	n.def		n.def	n.def	n.def	n.def	n.def	n.def		9.7	0	0	0	0	0	0	0	0	9.7	0	6.5	3.2	6.5	0	0	0	0	2	0	0	0	0	0	0	0	0	2
EG11427	>EG11427 tktA Transketolase A	Peripheral inner membrane protein facing the cytoplasm	F1					1.48244	0.26182	2.00186	0.0960673	1.39229	0.191654		0.983502	0.958162	0.569604	0.0761374	0.560207	0.0790549		20.1	31.2	35.3	25.2	28.1	19.8	29.4	12.8	28.5	19.6	30.2	28.5	20.2	20.5	38.5	26.5	31.8	31.8	10	12	13	10	11	8	11	7	11	10
EG11428	>EG11428 sthA Soluble pyridine nucleotide transhydrogenase	Peripheral inner membrane protein facing the cytoplasm	F1	Yes	Yes	Yes		4.88534	0.0347046	3.39746	0.00487953	4.59617	0.00702338		0.930398	0.88446	1.16351	0.702133	1.08253	0.836342		30.9	39.1	42.3	42.3	35.2	42.3	48.3	21.2	31.5	17.2	21.2	27	26.8	12.4	21.2	28.3	23.2	18	8	9	10	10	9	10	12	6	9	6
EG11430	>EG11430 roxA 50S ribosomal protein L16 Arg81 hydroxylase	Cytoplasmic	A					n.def	n.def	0.805252	n.def	n.def	n.def		n.def	n.def	n.def	n.def	n.def	n.def		0	5.9	0	0	3.8	0	3.5	0	0	0	0	0	0	0	5.9	5.9	0	0	0	1	0	0	1	0	1	0	0	0
EG11433	>EG11433 msrA Methionine sulfoxide reductase A	Cytoplasmic	A					2.37302	0.0168225	2.74965	0.000280458	1.66722	0.0489164		0.739627	0.238445	0.485976	0.0216499	0.359441	0.0182659		12.7	12.7	7.1	7.1	7.1	7.1	7.1	7.1	7.1	7.1	7.1	7.1	7.1	12.7	7.1	7.1	7.1	7.1	2	2	1	1	1	1	1	1	1	1
EG11440	>EG11440 def Peptide deformylase	Peripheral inner membrane protein facing the cytoplasm	F1					0.857097	0.537394	2.33744	0.992834	2.43281	0.911218		1.12399	0.777861	0.410542	0.507031	0.461446	0.535127		27.8	30.2	29.6	27.8	21.9	20.1	37.9	21.9	28.4	27.8	30.2	35.5	35.5	21.9	29.6	35.5	28.4	29.6	5	5	4	4	3	3	4	4	6	4
EG11441	>EG11441 prlC Oligopeptidase A, zinc metalloprotease	Peripheral inner membrane protein facing the cytoplasm	F1					1.05805	0.943198	2.51065	0.108453	1.13632	0.699993		1.13588	0.777897	0.798601	0.287728	0.907112	0.823743		12.8	26.8	25.6	23.5	22.1	17.5	24.9	17.5	19.9	17.5	22.5	28.4	17.9	21.6	26.6	19.9	29	25.3	7	14	13	11	12	10	14	10	11	10
EG11442	>EG11442 gcvT Aminomethyltransferase, tetrahydrofolate dependent	Peripheral inner membrane protein facing the cytoplasm	F1					0.390848	0.552799	0.520756	0.62601	1.15537	0.541474		3.45901	0.394902	0.847708	0.764306	2.93223	0.424064		26.4	19.5	26.4	22.5	23.9	28.6	23.9	15.7	26.4	15.7	22	26.4	28.6	20.6	28.6	23.9	17.9	21.4	7	5	7	6	6	7	6	5	7	5
EG11443	>EG11443 rpiA Ribose-5-phosphate isomerase A, alkali-inducible	Cytoplasmic	A					2.64884	0.0992197	1.7195	0.384798	1.11064	0.540679		0.734439	0.654488	0.811217	0.741955	0.595789	0.439182		23.7	26	5.5	21.5	5.5	5.5	5.5	5.5	5.5	12.8	23.7	5.5	5.5	5.5	5.5	5.5	5.5	5.5	4	3	1	2	1	1	1	1	1	2
EG11447	>EG11447 csrA Global regulator of carbon source metabolism	Cytoplasmic	A					n.def	n.def	n.def	n.def	n.def	n.def		n.def	n.def	n.def	n.def	n.def	n.def		31.1	31.1	50.8	31.1	31.1	31.1	31.1	31.1	31.1	0	0	31.1	31.1	31.1	31.1	31.1	31.1	31.1	1	1	2	1	1	1	1	1	1	0
EG11449	>EG11449 hdfR Transcriptional regulator of the flhDC operon, hns-dependent	Nucleoid	N					n.def	n.def	n.def	n.def	n.def	n.def		n.def	n.def	n.def	n.def	n.def	n.def		0	0	5.4	5.4	5.4	0	0	0	0	0	0	0	0	0	0	0	0	0	0	0	1	1	1	0	0	0	0	0
EG11450	>EG11450 yifE Function unknown, expressed protein, UPF0438 family	Peripheral inner membrane protein facing the cytoplasm	F1					2.14773	n.def	n.def	n.def	1.11856	n.def		n.def	n.def	n.def	n.def	n.def	n.def		8	31.2	20.5	20.5	20.5	0	20.5	19.6	19.6	19.6	28.6	20.5	20.5	19.6	20.5	19.6	0	0	1	3	1	1	1	0	2	1	1	1
EG11451	>EG11451 wecB UDP-GlcNAc-2-epimerase	Cytoplasmic	A					1.39611	n.def	0.262763	n.def	0.345387	n.def		n.def	n.def	n.def	n.def	n.def	n.def		11.4	14.6	14.6	15.2	11.7	8	8	12.5	10.9	3.7	17.3	10.6	10.9	14.4	10.9	14.1	8	8	3	4	4	4	3	2	2	4	3	1
EG11452	>EG11452 wecC UDP-ManNAcA dehydrogenase	Outer Membrane b-barrel protein	H					1.24371	n.def	n.def	n.def	n.def	n.def		n.def	n.def	n.def	n.def	n.def	n.def		4	4	4	5.7	4	0	0	0	4	4	4	0	0	0	4	0	0	2.9	1	1	1	1	1	0	0	0	1	1
EG11453	>EG11453 rffG dTDP-glucose dehydratase	Cytoplasmic	A					n.def	n.def	n.def	n.def	n.def	n.def		n.def	n.def	n.def	n.def	n.def	n.def		3.7	3.7	7.3	0	3.7	0	3.7	0	3.7	3.7	0	3.7	3.7	0	0	8.2	3.7	0	1	1	2	0	1	0	1	0	1	1
EG11456	>EG11456 wecE Lipid III biosynthesis	Cytoplasmic	A	Yes				FtsH only	FtsH only	1.52544	n.def	1.69246	n.def		n.def	n.def	n.def	n.def	n.def	n.def		10.6	9.3	9.3	3.5	2.9	5.1	5.1	2.1	2.1	0	6.4	2.1	2.1	0	4.3	6.4	2.1	0	3	3	3	1	1	2	2	1	1	0
EG11463	>EG11463 corA Mg2+ (and other divalent metals) uptake transporter	Integral Inner Membrane	B					1.69214	n.def	2.85984	n.def	2.70441	n.def		n.def	n.def	n.def	n.def	0.998783	0.994874		2.2	9.5	12.7	0	12.7	13.9	3.2	3.2	10.4	0	3.2	12.7	12.7	5.4	12.7	0	5.4	3.2	1	2	3	0	3	3	1	1	2	0
EG11467	>EG11467 yigI Function unknown, 4HBT family of thioesterases	Peripheral inner membrane protein facing the cytoplasm	F1					2.6513	0.0049565	1.33499	n.def	1.38583	0.316149		n.def	n.def	n.def	n.def	0.692912	0.139903		5.2	6.5	6.5	12.3	0	0	31	17.4	17.4	5.8	6.5	6.5	12.3	6.5	12.9	20	12.3	6.5	1	1	1	2	0	0	4	3	3	1
EG11470	>EG11470 yigL Pyridoxal phosphate (PLP) phosphatase	Cytoplasmic	A					n.def	n.def	n.def	n.def	1.09467	n.def		n.def	n.def	0.564003	0.230222	n.def	n.def		8.3	0	8.3	8.3	8.3	8.3	8.3	8.3	8.3	0	0	8.3	8.3	0	0	0	8.3	8.3	1	0	1	1	1	1	1	1	1	0
EG11473	>EG11473 ubiE Ubiquinone/menaquinone biosynthesis methyltransferase	Cytoplasmic	A	Yes	Yes	Yes		8.5096	0.0226885	9.43053	0.0128595	8.31487	0.000203325		0.70958	0.279607	0.758737	0.139845	0.538385	0.0186204		10.8	32.7	16.3	27.5	17.1	25.5	32.7	10	17.1	5.2	10.8	30.3	15.5	5.2	15.5	20.7	10	5.2	2	5	3	5	3	4	5	2	3	1
EG11476	>EG11476 ubiB Required for octaprenylphenol hydroxylation, the first step of ubiquinone synthesis	Integral Inner Membrane	B					n.def	n.def	n.def	n.def	n.def	n.def		n.def	n.def	n.def	n.def	n.def	n.def		1.8	0	0	0	0	0	1.8	0	1.8	0	1.8	0	0	0	0	0	1.5	0	1	0	0	0	0	0	1	0	1	0
EG11478	>EG11478 tatA Protein translocase, Sec-independent	Integral Inner Membrane	B					1.75632	n.def	2.13485	n.def	13.8217	n.def		n.def	n.def	n.def	n.def	0.939082	0.802935		23.6	23.6	14.6	0	0	14.6	14.6	14.6	14.6	0	0	14.6	14.6	0	0	14.6	0	14.6	1	1	1	0	0	1	1	1	1	0
EG11481	>EG11481 tatD Quality control of Tat-exported FeS proteins	Cytoplasmic	A					n.def	n.def	n.def	n.def	n.def	n.def		n.def	n.def	n.def	n.def	n.def	n.def		0	0	0	0	0	0	0	0	0	10	0	0	0	0	0	0	0	0	0	0	0	0	0	0	0	0	0	2
EG11485	>EG11485 hemG Protoporphyrinogen oxidase	Peripheral inner membrane protein facing the cytoplasm	F1					n.def	n.def	n.def	n.def	n.def	n.def		n.def	n.def	n.def	n.def	n.def	n.def		0	0	0	6.1	0	6.1	0	6.1	0	8.3	0	0	0	0	0	0	0	0	0	0	0	1	0	1	0	1	0	1
EG11487	>EG11487 pdxH Pyridoxine/pyridoxamine phosphate (PNP/PMP) oxidase	Peripheral inner membrane protein facing the cytoplasm	F1		Yes			1.45071	0.176205	FtsH only	FtsH only	1.22494	0.198755		1.15364	0.690874	0.503106	0.0576887	0.580402	0.0135168		10.1	20.2	15.1	26.1	12.8	10.6	5.5	10.6	18.8	16.5	5.5	14.2	14.7	9.2	17.9	26.1	10.6	10.6	2	3	2	4	2	2	1	2	3	3
EG11492	>EG11492 qorA Quinone oxidoreductase A, NADPH dependent	Cytoplasmic	A					n.def	n.def	n.def	n.def	n.def	n.def		n.def	n.def	n.def	n.def	n.def	n.def		13.1	11.9	11.9	11.9	6.1	11.9	11.9	6.1	15.6	0	0	0	5.8	0	0	0	5.8	3.1	2	2	2	2	1	2	2	1	3	0
EG11494	>EG11494 yceG Septation protein, ampicillin sensitivity	Integral Inner Membrane	B					n.def	n.def	n.def	n.def	n.def	n.def		n.def	n.def	n.def	n.def	n.def	n.def		0	0	0	0	0	0	4.1	0	0	0	0	4.1	0	0	8.2	4.1	0	0	0	0	0	0	0	0	1	0	0	0
EG11497;CON__Q9N2I2	>EG11497 prmA 50S subunit L11 protein lysine methyltransferase	Cytoplasmic	A					n.def	n.def	n.def	n.def	n.def	n.def		n.def	n.def	n.def	n.def	n.def	n.def		5.1	7.2	0	0	5.1	7.5	2.4	7.5	5.1	0	0	5.1	5.1	5.1	7.2	7.2	4.8	5.1	1	1	0	0	1	2	1	2	1	0
EG11502	>EG11502 rcsF Lipoprotein that signals increased capsule synthesis	Outer Membrane Lipoprotein	I					n.def	n.def	n.def	n.def	n.def	n.def		n.def	n.def	n.def	n.def	n.def	n.def		10.4	10.4	10.4	0	10.4	10.4	10.4	0	10.4	0	0	0	0	0	0	0	0	0	1	1	1	0	1	1	1	0	1	0
EG11504	>EG11504 metQ Periplasmic methionine binding lipoprotein	Inner Membrane Lipoprotein	E	Yes	Yes	Yes		6.17714	0.00221544	6.91506	0.00016874	8.36325	1.11041e-05		1.1689	0.366334	0.770706	0.011922	0.900879	0.460622		58.7	58.7	58.7	65.7	49.8	56.8	65.7	49.8	65.7	33.2	43.9	50.9	59.4	51.7	53.5	43.5	59.4	59.4	10	10	10	11	9	10	11	9	11	6
EG11506	>EG11506 ftsH ATP-dependent membrane protease, complexed with HflCK	Integral Inner Membrane	B	Yes	Yes	Yes		107.831	5.92423e-06	221.205	3.99959e-07	493.145	6.55678e-07		1	#DIV/0!	1	#DIV/0!	1	#DIV/0!		53.1	53	50.5	50.5	48.3	44.4	55.3	52.2	53	24.4	36.8	39	37.3	34.6	30.4	34.9	39	28.9	29	31	26	26	26	23	30	25	29	12
EG11507	>EG11507 rlmE 23S rRNA U2552 2-O-ribose methyltransferase, SAM-dependent	Peripheral inner membrane protein facing the cytoplasm	F1					0.51447	n.def	0.314978	n.def	n.def	n.def		n.def	n.def	n.def	n.def	n.def	n.def		5.3	11	11	5.7	5.3	0	0	10.5	0	5.7	11	5.7	0	5.7	11	5.3	5.7	5.7	1	2	2	1	1	0	0	1	0	1
EG11510	>EG11510 ppk Polyphosphate kinase, reversible	Peripheral inner membrane protein facing the cytoplasm	F1					0.229729	n.def	n.def	n.def	n.def	n.def		n.def	n.def	n.def	n.def	n.def	n.def		0	7.3	5.5	0	3.8	9.3	4.9	7.3	2.3	2.9	3.8	6.7	0	4.4	4.8	2.3	1.7	3.3	0	4	3	0	2	5	3	4	1	2
EG11511	>EG11511 mog Molybdochelatase incorporating molybdenum into molybdopterin	Cytoplasmic	A					1.04721	n.def	n.def	n.def	n.def	n.def		n.def	n.def	n.def	n.def	n.def	n.def		0	4.6	13.3	0	4.6	6.2	0	4.6	4.6	6.2	0	0	6.7	6.7	0	0	0	4.6	0	1	2	0	1	1	0	1	1	1
EG11517	>EG11517 glpX Fructose 1,6 bisphosphatase	Cytoplasmic	A					n.def	n.def	n.def	n.def	n.def	n.def		n.def	n.def	n.def	n.def	n.def	n.def		0	3.9	3.9	0	3.9	4.2	4.2	0	3.9	0	0	0	0	0	0	0	0	0	0	1	1	0	1	1	1	0	1	0
EG11518	>EG11518 fpr Ferredoxin NADP+ reductase	Cytoplasmic	A					n.def	n.def	1.3455	n.def	n.def	n.def		n.def	n.def	n.def	n.def	n.def	n.def		13.3	3.6	0	9.7	9.7	3.6	6.5	6.5	9.7	0	0	0	13.3	3.6	13.3	6.5	3.6	3.6	2	1	0	1	1	1	1	1	1	0
EG11519	>EG11519 nikR Nickel-responsive regulator of the nik operon	Nucleoid	N					2.98931	n.def	3.53544	n.def	1.75378	0.120192		n.def	n.def	n.def	n.def	n.def	n.def		34.6	34.6	33.8	47.4	27.1	27.1	47.4	27.1	27.1	0	19.5	27.1	47.4	27.1	47.4	33.8	27.1	27.1	4	4	3	3	2	2	3	2	2	0
EG11527	>EG11527 narP Two-component regulator protein for nitrate/nitrite response	Nucleoid	N					n.def	n.def	n.def	n.def	n.def	n.def		n.def	n.def	n.def	n.def	n.def	n.def		0	0	5.1	0	0	5.6	0	10.7	0	0	0	5.1	0	5.6	5.1	5.6	5.6	0	0	0	1	0	0	1	0	2	0	0
EG11528	>EG11528 fabI Enoyl-ACP reductase, NADH dependent	Peripheral inner membrane protein facing the cytoplasm	F1					1.56861	0.274124	2.03933	0.167702	0.955986	0.391744		0.627106	0.444241	0.874216	0.746661	0.548226	0.05165		50	50	45.4	49.2	50	44.7	44.7	34.7	50	44.7	50	45.4	44.7	39.3	40.1	50	49.2	46.2	10	10	9	9	10	8	8	7	10	8
EG11529	>EG11529 ftsN Cell division and growth	Integral Inner Membrane	B					n.def	n.def	n.def	n.def	n.def	n.def		n.def	n.def	n.def	n.def	n.def	n.def		0	0	0	0	0	0	0	0	0	6	6	0	0	6	6	0	6	0	0	0	0	0	0	0	0	0	0	1
EG11531	>EG11531 cfa Cyclopropane fatty acid synthase	Peripheral inner membrane protein facing the cytoplasm	F1					0.573521	n.def	1.88416	n.def	0.597787	n.def		n.def	n.def	n.def	n.def	n.def	n.def		2.1	8.4	4.7	0	2.9	2.1	2.9	0	9.7	0	7.6	0	7.9	8.6	3.9	0	9.7	0	1	3	2	0	1	1	1	0	4	0
EG11534	>EG11534 ibpA Chaperone, heat-inducible protein of HSP20 family	Cytoplasmic	A					3.70319	n.def	1.52857	n.def	4.29977	n.def		0.647722	0.188503	n.def	n.def	n.def	n.def		6.6	6.6	13.9	6.6	6.6	6.6	6.6	0	0	6.6	6.6	6.6	6.6	6.6	6.6	0	6.6	6.6	1	1	2	1	1	1	1	0	0	1
EG11535	>EG11535 ibpB Chaperone, heat-inducible protein of HSP20 family	Cytoplasmic	A					n.def	n.def	n.def	n.def	n.def	n.def		n.def	n.def	n.def	n.def	n.def	n.def		7.7	0	0	6.3	6.3	6.3	6.3	6.3	6.3	6.3	0	0	6.3	8.5	8.5	6.3	6.3	14.8	1	0	0	1	1	1	1	1	1	1
EG11537	>EG11537 yceH Function unknown, UPF0502 family	Cytoplasmic	A					n.def	n.def	n.def	n.def	n.def	n.def		n.def	n.def	n.def	n.def	n.def	n.def		4.7	4.7	4.7	17.2	4.7	0	0	4.7	8.8	0	0	0	0	0	0	0	0	0	1	1	1	3	1	0	0	1	2	0
EG11539	>EG11539 pyrH Uridylate kinase	Peripheral inner membrane protein facing the cytoplasm	F1					0.586384	0.120044	0.663195	0.168832	1.23467	0.738053		1.01424	0.952279	0.741796	0.158715	0.752359	0.122291		34.4	29.9	34.4	34.4	29.9	29.9	34.4	29.9	34.4	21.2	21.2	29.9	34.4	21.2	25.7	29.9	34.4	34.4	5	4	5	7	5	6	6	5	7	5
EG11540	>EG11540 wrbA NAD(P)H:quinone oxidoreductase, type IV NQO	Cytoplasmic	A					0.244962	n.def	0.00999162	n.def	n.def	n.def		n.def	n.def	n.def	n.def	n.def	n.def		26.8	14.6	14.1	8.6	8.6	14.6	8.6	14.1	8.6	21.2	14.1	14.6	14.6	8.6	8.6	8.6	8.6	21.2	3	2	2	1	1	2	1	2	1	2
EG11542	>EG11542 tesA Acyl-CoA thioesterase I	Periplasmic	G					0.888326	0.95118	1.42983	0.252498	0.637138	0.562814		0.896484	0.868879	0.341833	0.180393	0.306448	0.17769		14.9	5.8	14.9	5.8	5.8	14.9	14.9	14.9	5.8	14.9	20.7	14.9	20.7	20.7	14.9	14.9	14.9	14.9	2	1	2	1	1	2	2	2	1	2
EG11543	>EG11543 hemE Uroporphyrinogen decarboxylase	Cytoplasmic	A	Yes				FtsH only	FtsH only	n.def	n.def	n.def	n.def		0.763149	0.485632	n.def	n.def	n.def	n.def		8.5	8.8	8.8	8.8	6.5	13.8	0	11.6	8.8	2.3	0	9.3	4.2	4.2	4.2	7.3	8.8	2.3	2	2	2	2	1	3	0	2	2	1
EG11546	>EG11546 nadC Quinolinate phosphoribosyl transferase	Cytoplasmic	A		Yes	Yes		n.def	n.def	FtsH only	FtsH only	FtsH only	FtsH only		n.def	n.def	0.780507	0.529718	n.def	n.def		15.8	0	9.8	10.1	15.2	19.2	10.1	13.8	15.2	5.4	0	10.1	5.4	5.4	0	10.1	10.1	5.4	3	0	2	2	3	4	2	3	3	1
EG11547	>EG11547 rnt RNase T	Cytoplasmic	A					n.def	n.def	n.def	n.def	n.def	n.def		n.def	n.def	n.def	n.def	0.594629	0.0531663		6	14	6	18.1	6	0	6	6	6	0	0	0	0	0	0	0	0	0	1	2	1	2	1	0	1	1	1	0
EG11553	>EG11553 glmM Phosphoglucosamine mutase	Cytoplasmic	A					0.606493	0.175215	0.517522	0.167151	0.26907	0.0772742		0.93317	0.831187	0.811054	0.394222	0.756852	0.197691		11.2	13.3	15.5	6.3	13	20.2	16.4	19.3	17.3	20	10.1	6.3	9.2	15.3	16.4	13.3	13	13	4	4	5	2	4	6	5	6	5	6
EG11554	>EG11554 stpA RNA chaperone and DNA-binding protein	Nucleoid, Peripheral inner membrane protein facing the cytoplasm	N,F1					1.68743	0.471282	0.459094	0.152651	2.35889	0.420867		0.519068	0.301965	0.549912	0.18168	0.285442	0.101674		41.8	41.8	41.8	41.8	41.8	32.1	41.8	32.1	41.8	23.9	32.1	19.4	33.6	19.4	33.6	41.8	41.8	33.6	4	5	5	5	5	4	5	4	5	2
EG11556	>EG11556 talB Transaldolase B	Peripheral inner membrane protein facing the cytoplasm	F1					2.63537	0.176937	2.56194	0.0832219	0.547577	0.13315		1.07275	0.912861	0.58203	0.302349	0.624372	0.0991439		50.2	45.1	46.4	46.4	46.7	30.6	39.7	33.8	46.1	40.1	43.5	43.5	42.9	49.2	52.7	46.4	49.8	46.4	13	12	11	11	11	6	8	7	11	9
EG11569	>EG11569 lptD LPS assembly OM complex LptDE, beta-barrel component	Outer Membrane b-barrel protein	H		Yes	Yes		n.def	n.def	FtsH only	FtsH only	FtsH only	FtsH only		n.def	n.def	n.def	n.def	0.613174	0.154165		2.4	3.1	3.8	3.8	7.3	6	3.2	5.5	4.8	1.4	0	1.7	1.8	3.1	1.8	1.8	3.2	1.4	1	2	2	2	4	3	2	3	3	1
EG11575	>EG11575 leuD 3-isopropylmalate dehydratase small subunit	Cytoplasmic	A					2.73068	0.0903512	0.268558	0.132597	0.714228	0.738229		0.367779	0.268462	1.30566	0.701884	0.480193	0.283259		29.4	30.8	22.4	35.8	29.4	22.4	18.9	7	18.9	6.5	28.9	30.8	30.8	18.9	22.4	18.9	18.9	18.9	3	3	2	4	3	2	2	1	2	1
EG11576	>EG11576 leuC 3-isopropylmalate dehydratase large subunit	Cytoplasmic	A					2.37536	0.220852	0.611106	0.260058	0.963472	0.872587		1.06139	0.809731	0.367355	0.0913131	0.389908	0.101717		8.8	16.1	16.1	13.1	13.1	10.5	13.1	10.5	14.8	11.8	16.1	17.8	17.8	13.5	14.8	17.8	20.6	20.6	3	5	5	4	4	4	4	4	5	4
EG11577	>EG11577 leuB 3-isopropylmalate dehydrogenase, NAD(+)-dependent	Cytoplasmic	A					0.785778	0.741797	0.651042	0.308528	0.61694	n.def		1.27158	0.610516	n.def	n.def	n.def	n.def		10.2	19.3	22.6	12.9	14.9	14.9	25.9	6.9	19.3	11.3	22.6	19.3	16.3	9.4	16.3	16.3	21.2	13.2	3	5	6	3	4	4	6	2	5	4
EG11580	>EG11580 ybiB Predicted family 3 glycosyltransferase, function unknown	Cytoplasmic	A	Yes	Yes			FtsH only	FtsH only	FtsH only	FtsH only	2.68854	0.00696052		0.987083	0.944091	1.12896	0.487672	1.11438	0.500161		11.6	24.7	15	24.4	15.9	16.9	8.1	16.9	20.6	4.1	11.2	3.8	7.5	4.1	4.1	16.6	3.4	11.2	3	6	4	6	4	4	2	4	5	1
EG11581	>EG11581 ybiC Function unknown, lactate, malate dehydrogenase family	Cytoplasmic	A					n.def	n.def	n.def	n.def	n.def	n.def		n.def	n.def	n.def	n.def	n.def	n.def		0	8.9	4.7	4.2	0	0	4.2	0	0	3.3	0	0	4.2	0	0	0	0	0	0	2	1	1	0	0	1	0	0	1
EG11592	>EG11592 ybeD Required for swarming and phage lambda growth	Cytoplasmic	A		Yes			1.52756	0.231321	FtsH only	FtsH only	1.31357	n.def		0.717664	0.039415	0.625814	0.169965	0.449124	0.0651868		37.9	55.2	37.9	55.2	55.2	55.2	37.9	33.3	37.9	16.1	33.3	33.3	16.1	16.1	33.3	33.3	17.2	55.2	2	3	2	3	3	3	2	2	2	1
EG11595	>EG11595 moaA MPT synthesis	Cytoplasmic	A					n.def	n.def	n.def	n.def	n.def	n.def		n.def	n.def	n.def	n.def	n.def	n.def		3	3	3	0	0	3	4.6	0	0	3	0	0	0	0	0	0	0	0	1	1	1	0	0	1	1	0	0	1
EG11596	>EG11596 moaB MPT synthesis	Peripheral inner membrane protein facing the cytoplasm	F1					0.598209	n.def	n.def	n.def	n.def	n.def		n.def	n.def	n.def	n.def	n.def	n.def		5.3	5.3	5.3	5.3	5.3	5.3	0	0	5.3	13.5	13.5	5.3	0	0	14.1	5.3	5.3	5.3	1	1	1	1	1	1	0	0	1	2
EG11600	>EG11600 sseA 3-mercaptopyruvate sulfurtransferase	Cytoplasmic	A					n.def	n.def	n.def	n.def	n.def	n.def		n.def	n.def	n.def	n.def	n.def	n.def		4.3	8.9	4.3	0	14.2	6.8	4.3	0	6.8	11	8.9	11	4.3	0	8.9	4.3	4.3	15.7	1	2	1	0	2	1	1	0	1	2
EG11601	>EG11601 sseB Enhances serine sensitivity (inhibits homoserine deHase) on lactate	Cytoplasmic	A					n.def	n.def	n.def	n.def	n.def	n.def		n.def	n.def	n.def	n.def	n.def	n.def		0	0	5	0	0	0	0	0	0	0	0	0	3.5	0	0	0	0	0	0	0	1	0	0	0	0	0	0	0
EG11602	>EG11602 glnE Protein adenylyltransferase, modifies glutamine synthase	Cytoplasmic	A					n.def	n.def	1.43946	n.def	n.def	n.def		n.def	n.def	n.def	n.def	n.def	n.def		0	0	0	1.4	1.6	0	1.6	3	0	1.4	0	0	1.6	0	0	0	0	0	0	0	0	1	1	0	1	2	0	1
EG11603	>EG11603 ygiF Function unknown	Cytoplasmic	A		Yes			4.92472	0.15777	FtsH only	FtsH only	n.def	n.def		1.29089	0.382383	0.938957	0.730017	1.21209	0.482529		4.4	8.8	6.2	5.5	4.4	8.8	9.2	2.8	9.7	7.4	4.6	7.4	4.6	4.6	6.2	2.8	7.4	6.2	2	4	3	2	2	4	4	1	4	3
EG11607	>EG11607 yciI Function unknown	Cytoplasmic	A					n.def	n.def	n.def	n.def	16.6763	n.def		n.def	n.def	n.def	n.def	n.def	n.def		10.2	0	0	0	9.2	9.2	0	10.2	0	0	0	0	0	0	0	0	10.2	0	1	0	0	0	1	1	0	1	0	0
EG11612	>EG11612 proP Proline/betaine permease, minor	Integral Inner Membrane	B					n.def	n.def	1.21484	0.702057	1.10317	n.def		n.def	n.def	0.494899	0.189142	n.def	n.def		0	0	0	3	3	3	5.8	2.8	3	5.4	0	5.8	3	5.8	3	0	3	5.8	0	0	0	1	1	1	2	1	1	2
EG11613	>EG11613 eptA Lipid A phosphoethanolamine transferase, associated with polymyxin resistance	Integral Inner Membrane	B	Yes	Yes	Yes		FtsH only	FtsH only	FtsH only	FtsH only	FtsH only	FtsH only		1.40842	0.419845	0.861908	0.680845	1.21393	0.464602		3.5	14.4	4.2	7.1	3.5	3.7	7.1	3.5	5.1	0	4.2	3.7	3.7	0	5.7	2	3.7	5.7	2	5	2	3	2	2	3	2	2	0
EG11614	>EG11614 basS Histidine protein kinase sensor for Lipid A modification genes	Integral Inner Membrane	B					n.def	n.def	n.def	n.def	n.def	n.def		n.def	n.def	n.def	n.def	n.def	n.def		3.9	0	0	0	0	0	0	0	0	0	0	0	0	0	0	0	0	0	1	0	0	0	0	0	0	0	0	0
EG11615	>EG11615 basR Response regulator for Lipid A modification genes	Nucleoid	N	Yes				5.59988	0.0224786	7.12669	n.def	n.def	n.def		n.def	n.def	n.def	n.def	n.def	n.def		10.4	25.2	10.4	16.2	10.4	5.4	5.4	5.4	5.4	16.7	11.3	5	5	0	11.7	10.4	6.3	14.4	2	3	2	2	2	1	1	1	1	3
EG11618	>EG11618 baeR Response regulator for mdtABCD, acrD and spy	Nucleoid	N					n.def	n.def	n.def	n.def	n.def	n.def		n.def	n.def	n.def	n.def	n.def	n.def		9.2	11.2	7.1	12.1	5	5	7.1	5	5	0	0	0	0	5	7.1	0	7.1	0	2	2	1	2	1	1	1	1	1	0
EG11619	>EG11619 mfd Transcription repair coupling factor	Cytoplasmic	A					0.244338	n.def	0.181562	0.117487	0.429462	0.600942		n.def	n.def	1.1928	0.844175	n.def	n.def		0	4.2	6.3	3.6	3.4	3.3	6	5.3	4.2	4.1	3.7	3.9	5.6	4.4	3.4	4.4	6.1	7.3	0	4	6	4	3	3	6	5	4	4
EG11620	>EG11620 rnb RNase II		N, F1					2.15272	0.26637	0.882124	0.913882	0.488839	0.00811285		1.26108	0.58606	0.546484	0.0758085	0.689161	0.135744		20	35.6	28.4	31.1	27.8	32.1	33.7	26.6	30.4	16	20.5	31.1	22.2	20.2	28.1	24.2	22.5	18.9	10	17	14	13	12	14	14	11	13	8
EG11621	>EG11621 metN ABC transporter ATPase, L,D-methionine uptake	Peripheral inner membrane protein facing the cytoplasm	F1					n.def	n.def	2.71416	n.def	n.def	n.def		n.def	n.def	n.def	n.def	n.def	n.def		5.2	13.4	5.2	5.2	5.2	0	0	0	2	5.2	5.2	7.3	5.2	5.2	5.2	7.3	5.2	7.3	1	2	1	1	1	0	0	0	1	1
EG11623	>EG11623 sdaB L-Serine deaminase II	Cytoplasmic	A	Yes		Yes		2.76533	0.01926	3.09986	0.0625946	9.23996	0.000325108		0.85378	0.789388	1.3134	0.661091	1.12135	0.524445		9.9	12.5	9.5	10.5	9.9	10.5	12.7	9.7	9.5	2.4	7.7	11.9	12.7	7.7	12.5	12.5	11.9	12.7	3	5	3	4	3	4	4	4	3	1
EG11624	>EG11624 artP Arginine ABC transporter ATP-binding protein	Peripheral inner membrane protein facing the cytoplasm	F1					2.88866	n.def	4.12258	n.def	1.80348	n.def		n.def	n.def	0.7696	0.345845	n.def	n.def		8.7	9.9	0	13.2	8.3	13.2	19.4	5	13.2	3.7	12	5	11.2	5	8.3	8.3	13.2	13.2	2	2	0	2	1	2	3	1	2	1
EG11625	>EG11625 artI Periplasmic binding protein in artPIQM operon, ligand unknown	Periplasmic	G					0.479827	n.def	1.49449	n.def	1.66153	n.def		n.def	n.def	n.def	n.def	n.def	n.def		21	23	22.6	27.6	27.6	12.8	27.6	12.3	27.6	24.3	30	27.6	28	27.6	29.2	21	27.6	27.6	3	5	4	4	4	3	4	2	4	4
EG11626	>EG11626 artQ Arginine ABC transporter permease	Integral Inner Membrane	B					n.def	n.def	n.def	n.def	n.def	n.def		n.def	n.def	n.def	n.def	n.def	n.def		0	7.1	7.1	7.1	7.1	0	0	0	7.1	7.1	0	7.1	0	0	7.1	0	7.1	7.1	0	1	1	1	1	0	0	0	1	1
EG11628	>EG11628 artJ Arginine-binding protein, periplasmic	Periplasmic	G					4.15241	n.def	n.def	n.def	1.04177	n.def		n.def	n.def	n.def	n.def	n.def	n.def		3.7	18.5	22.2	17.7	10.3	11.1	3.7	11.1	10.3	14.8	16	23.9	13.6	0	18.1	9.9	3.7	16.5	1	3	4	3	2	2	1	2	2	3
EG11647	>EG11647 accA Acetyl-CoA carboxylase, carboxyltransferase alpha subunit	Peripheral inner membrane protein facing the cytoplasm	F1					1.51563	0.589164	0.47245	0.138916	0.483333	0.248716		0.632268	0.0160221	0.385527	0.214201	0.243756	0.144424		41.7	43.9	32.9	46.7	29.8	25.7	41.1	27	41.1	16.6	23.2	36.7	39.5	29.5	39.2	30.7	38.2	34.8	11	10	6	10	7	5	9	6	9	4
EG11652	>EG11652 degS Serine protease, degrades periplasmic RseA, activating RpoE	Periplasmic	G					n.def	n.def	n.def	n.def	n.def	n.def		n.def	n.def	n.def	n.def	n.def	n.def		5.9	5.9	0	0	0	0	0	0	0	0	5.9	0	0	0	0	0	3.7	0	1	1	0	0	0	0	0	0	0	0
EG11663	>EG11663 slyD FKBP-type peptidyl-prolyl cis-trans isomerase	Peripheral inner membrane protein facing the cytoplasm	F1	Yes				3.89365	0.00632282	1.02265	0.799758	0.282367	0.00210267		0.149011	0.11067	0.369381	0.0696187	0.0550418	0.0099378		49.5	70.4	49.5	70.4	46.4	67.3	69.9	68.9	67.3	46.4	46.4	46.4	67.3	67.3	46.4	46.4	67.3	46.4	7	8	7	8	5	6	8	7	6	5
EG11666	>EG11666 moaC MPT (molybdopterin ) biosynthesis	Cytoplasmic	A			Yes		4.44041	n.def	1.03868	0.723861	2.91097	0.0256857		1.10663	0.746442	1.08311	0.834932	1.19861	0.6627		8.1	25.5	25.5	20.5	25.5	27.3	25.5	27.3	20.5	0	8.1	8.1	20.5	20.5	20.5	20.5	20.5	20.5	1	3	3	2	3	3	3	3	2	0
EG11673	>EG11673 folB Dihydroneopterin aldolase	Cytoplasmic	A					n.def	n.def	n.def	n.def	n.def	n.def		n.def	n.def	n.def	n.def	n.def	n.def		9.8	9.8	9.8	0	9.8	0	9.8	0	9.8	0	9.8	0	9.8	0	0	0	0	9.8	1	1	1	0	1	0	1	0	1	0
EG11675	>EG11675 panB Ketopantoate hydroxymethyltransferase	Cytoplasmic	A					0.343264	n.def	0.145845	n.def	2.59372	n.def		n.def	n.def	n.def	n.def	n.def	n.def		8.7	13.6	3.8	17.4	3.8	11	15.9	3.8	0	3.8	15.9	8.7	4.9	8.7	15.9	3.8	15.9	3.8	2	2	1	3	1	2	3	1	0	1
EG11676	>EG11676 hslV Heat-inducible ATP-dependent protease HslVU, protease subunit	Cytoplasmic	A	Yes				2.56129	0.0145459	3.63684	0.015037	3.14796	0.000608949		1.22842	0.479508	0.844161	0.594975	1.03698	0.815799		17.6	17.6	17.6	17.6	6.2	6.2	17.6	6.2	18.2	21.6	17.6	17.6	17.6	17.6	6.2	6.2	6.2	17.6	2	2	2	2	1	1	2	1	2	3
EG11680	>EG11680 lptB LPS export ABC transporter ATP-binding protein	Peripheral inner membrane protein facing the cytoplasm	F1	Yes	Yes			FtsH only	FtsH only	FtsH only	FtsH only	5.49826	0.00167844		0.776907	0.332173	0.701621	0.093315	0.545094	0.0146468		19.5	22.8	28.2	13.7	22.4	19.5	19.5	8.3	8.3	5.4	8.3	8.3	8.3	0	17	14.1	8.3	19.5	3	3	4	2	4	3	3	1	1	1
EG11681	>EG11681 hpf Ribosome hibernation promoting factor HPF	Cytoplasmic	A					n.def	n.def	1.0591	n.def	1.96414	n.def		1.12622	0.708965	n.def	n.def	n.def	n.def		27.4	33.7	9.5	27.4	27.4	17.9	0	17.9	9.5	0	9.5	25.3	17.9	27.4	0	17.9	17.9	9.5	2	2	1	2	2	1	0	1	1	0
EG11682	>EG11682 ptsN Nitrogen regulatory protein, PTS system EIIA(Ntr) component	Peripheral inner membrane protein facing the cytoplasm	F1					0.737793	0.473454	1.37399	0.160498	0.947404	0.681048		1.19876	0.670679	0.514454	0.0540269	0.616708	0.187152		16.6	36.8	16.6	16.6	30.1	30.1	23.3	20.2	30.1	13.5	20.2	20.2	30.1	20.2	30.1	30.1	20.2	6.7	2	4	2	2	3	3	3	2	3	1
EG11684	>EG11684 yicH Function unknown	Integral Inner Membrane	B					n.def	n.def	n.def	n.def	n.def	n.def		n.def	n.def	n.def	n.def	n.def	n.def		0	1.8	1.8	0	0	1.8	2.6	1.8	1.8	0	1.8	0	0	1.8	0	1.8	0	0	0	1	1	0	0	1	1	1	1	0
EG11692	>EG11692 ade Cryptic (or inducer-unknown) adenine deaminase	Cytoplasmic	A					n.def	n.def	n.def	n.def	n.def	n.def		n.def	n.def	n.def	n.def	n.def	n.def		0	0	0	0	2.9	0	0	2.7	0	0	0	0	0	0	0	0	0	0	0	0	0	0	1	0	0	1	0	0
EG11699	>EG11699 gpmA Phosphoglycerate mutase, 2,3-bisphosphoglycerate-dependent	Peripheral inner membrane protein facing the cytoplasm	F1					0.52736	0.070532	1.17575	0.804868	1.3035	0.586895		1.93236	0.137459	0.563068	0.326015	1.08805	0.819579		34	58.4	43.2	57.2	44.4	23.6	48.8	51.2	56	28.4	36.8	48.8	47.6	57.6	57.6	38.4	56.4	50.4	9	13	10	11	10	6	10	9	10	7
EG11701	>EG11701 udk Uridine/cytidine kinase	Cytoplasmic	A	Yes				FtsH only	FtsH only	2.05835	n.def	2.5155	0.0180262		n.def	n.def	n.def	n.def	1.11126	0.638367		14.1	7.5	11.7	7.5	7.5	0	21.6	7.5	3.3	4.2	3.3	7.5	3.3	4.2	3.3	11.7	4.2	4.2	3	2	2	2	2	0	4	2	1	1
EG11702	>EG11702 nudC NADH pyrophosphatase	Cytoplasmic	A		Yes	Yes		0.770002	0.298602	FtsH only	FtsH only	FtsH only	FtsH only		1.48622	0.463749	1.33732	0.691899	1.98754	0.20775		27.6	26.5	37	19.8	37	25.7	36.6	16	23	13.6	7	3.5	10.1	6.6	6.6	3.5	3.5	6.6	4	5	7	3	6	4	6	3	5	3
EG11703;EG10266	>EG11703 acrA AcrAB-TolC multidrug efflux pump	Inner Membrane Lipoprotein	E	Yes				3.55349	0.00178458	3.37635	0.0966678	4.05017	0.162212		0.98685	0.926666	0.86653	0.0752811	0.855134	0.256721		24.7	39.5	32.5	44.1	33.8	40.8	41.1	39	50.6	35	21.9	46.1	52.9	30.2	47.1	35.5	50.6	53.4	8	10	9	10	10	11	12	11	13	10
EG11704	>EG11704 acrB AcrAB-TolC multidrug efflux pump	Integral Inner Membrane	B					1.8266	0.150746	1.04074	0.715319	1.03	0.886147		1.14079	0.708056	0.801142	0.295137	0.913933	0.73588		6.1	15.8	13.1	11.3	15.3	10.1	15.4	13.8	17.3	8.3	11.9	15.8	13.3	7.8	12.2	14.5	13.8	7.4	4	10	9	7	9	7	10	9	11	6
EG11713	>EG11713 yidR Function unknown, DUF3748 family	Cytoplasmic	A					0.866822	n.def	0.908715	n.def	2.2121	0.184667		n.def	n.def	n.def	n.def	n.def	n.def		8	3.4	3.4	3.4	3.4	8	8	3.4	3.4	0	3.4	3.4	8	3.4	3.4	3.4	3.4	3.4	2	1	1	1	1	2	2	1	1	0
EG11723	>EG11723 chrR Chromate reductase, Class I, flavoprotein	Cytoplasmic	A					n.def	n.def	n.def	n.def	n.def	n.def		n.def	n.def	n.def	n.def	n.def	n.def		5.9	0	0	16	0	0	5.9	0	0	0	0	0	0	0	0	0	5.9	5.9	1	0	0	1	0	0	1	0	0	0
EG11736	>EG11736 gmhB Heptose 1,7-bisphosphate phosphatase	Cytoplasmic	A					n.def	n.def	n.def	n.def	n.def	n.def		n.def	n.def	n.def	n.def	n.def	n.def		4.7	0	0	0	4.7	4.7	0	0	0	4.7	0	4.7	4.7	4.7	0	4.7	4.7	0	1	0	0	0	1	1	0	0	0	1
EG11737	>EG11737 metI ABC transporter permease, L,D-methionine uptake	Integral Inner Membrane	B					n.def	n.def	n.def	n.def	n.def	n.def		n.def	n.def	n.def	n.def	n.def	n.def		8.3	8.3	8.3	8.3	8.3	8.3	8.3	8.3	8.3	0	8.3	0	8.3	0	0	13.4	8.3	0	1	1	1	1	1	1	1	1	1	0
EG11738	>EG11738 rsd Regulates RNA polymerase holoenzyme formation	Cytoplasmic	A					3.44532	n.def	0.22028	0.200525	0.464724	n.def		0.241814	0.248068	n.def	n.def	n.def	n.def		13.3	10.1	7	13.3	7	7	13.3	0	7	0	7	7	7	7	7	7	6.3	7	2	1	1	2	1	1	2	0	1	0
EG11746	>EG11746 panC Pantothenate synthase, dimeric	Cytoplasmic	A	Yes				2.70179	0.0494461	1.44556	0.672947	1.36974	0.490772		1.01071	0.96147	0.917374	0.344244	0.927195	0.724267		18.4	29.7	14.5	30	14.1	27.2	15.2	15.2	20.8	8.5	14.1	11.3	17	8.1	8.8	4.9	20.8	8.8	5	6	4	6	3	5	4	4	5	2
EG11747	>EG11747 panD Aspartate 1-decarboxylase	Cytoplasmic	A					4.8221	0.017297	3.89614	n.def	7.81282	n.def		0.663069	0.317756	1.84654	0.183103	1.22439	0.452939		13.5	7.9	13.5	7.9	13.5	7.9	7.9	13.5	13.5	7.9	13.5	13.5	13.5	5.6	13.5	13.5	13.5	5.6	2	1	2	1	2	1	1	2	2	1
EG11757	>EG11757 tsaE tRNA(NNU) t(6)A37 threonylcarbamoyladenosine modification	Cytoplasmic	A					0.153357	n.def	n.def	n.def	n.def	n.def		n.def	n.def	n.def	n.def	n.def	n.def		19.6	0	10.5	10.5	0	10.5	10.5	8.5	10.5	9.2	0	0	0	0	0	0	0	0	2	0	1	1	0	1	1	1	1	1
EG11759	>EG11759 yciK Predicted oxidoreductase, COG1028 family	Cytoplasmic	A					1.69585	n.def	n.def	n.def	n.def	n.def		n.def	n.def	n.def	n.def	n.def	n.def		2.8	5.2	5.2	5.2	0	0	0	0	5.2	14.3	0	0	0	0	0	0	0	0	1	1	1	1	0	0	0	0	1	3
EG11768	>EG11768 mnmH tRNA 2-selenouridine synthase, selenophosphate-dependent	Cytoplasmic	A					4.29605	n.def	n.def	n.def	n.def	n.def		n.def	n.def	1.56447	0.486887	n.def	n.def		8.5	0	0	3.6	3.6	8	20.3	9.3	3.6	0	3.6	0	0	0	0	0	0	0	2	0	0	1	1	2	4	2	1	0
EG11774	>EG11774 nuoF NADH:ubiquinone oxidoreductase subunit F, complex I	Peripheral inner membrane protein facing the cytoplasm	F1			Yes		13.2887	0.1272	6.75341	0.344067	8.86839	0.0348041		0.697218	0.467143	0.844653	0.65012	0.588907	0.00243743		9.2	24	20.4	25.8	17.3	15.7	18.7	7.6	17.5	13.7	13.7	18.7	21.1	13.9	20.9	14.2	13.7	20.7	4	10	8	8	7	5	8	3	8	5
EG11776	>EG11776 ybfF Acyl-CoA esterase in vitro, function unknown	Cytoplasmic	A					n.def	n.def	4.1652	n.def	n.def	n.def		n.def	n.def	n.def	n.def	n.def	n.def		4.3	4.3	4.3	14.6	4.3	0	4.3	0	0	0	0	0	0	4.3	4.3	0	4.3	4.3	1	1	1	3	1	0	1	0	0	0
EG11779	>EG11779 trmI tRNA m(7)G46 methyltransferase, SAM-dependent	Cytoplasmic	A	Yes	Yes	Yes		6.14118	0.0179162	7.20296	0.000664287	8.86174	0.00363299		0.92787	0.696851	0.77397	0.342434	0.718143	0.267171		9.2	9.2	9.2	18	9.2	9.2	18	9.2	9.2	9.2	9.2	9.2	9.2	9.2	9.2	9.2	9.2	9.2	2	2	2	3	2	2	3	2	2	2
EG11782	>EG11782 smpB tmRNA RNA-binding protein	Cytoplasmic	A					n.def	n.def	0.332231	n.def	0.306693	n.def		n.def	n.def	n.def	n.def	n.def	n.def		8.1	8.1	8.1	15	15	8.1	8.1	8.1	15	0	8.1	8.1	15	8.1	15	15	15	15	1	1	1	2	2	1	1	1	2	0
EG11784	>EG11784 grcA Autonomous glycine radical cofactor	Peripheral inner membrane protein facing the cytoplasm	F1					0.30002	n.def	n.def	n.def	n.def	n.def		n.def	n.def	n.def	n.def	n.def	n.def		0	10.2	0	0	0	0	0	0	0	0	0	10.2	0	10.2	5.5	0	0	0	0	1	0	0	0	0	0	0	0	0
EG11786	>EG11786 yfiF Predicted methyltransferase, function unknown	Peripheral inner membrane protein facing the cytoplasm	F1	Yes				FtsH only	FtsH only	1.07343	0.988142	2.62113	n.def		0.783224	0.40798	n.def	n.def	n.def	n.def		17.7	21.7	17.7	10.4	7.2	12.8	10.4	5.5	0	8.4	7.2	5.5	5.5	10.4	10.4	5.5	5.5	15.4	3	4	3	2	1	2	2	2	0	2
EG11794	>EG11794 rlmM 23S rRNA C2498 2-O-ribose methyltransferase, SAM-dependent	Cytoplasmic	A					n.def	n.def	n.def	n.def	n.def	n.def		n.def	n.def	n.def	n.def	n.def	n.def		0	0	2.7	0	0	0	0	3.8	0	3.3	3.3	0	0	0	0	0	0	0	0	0	1	0	0	0	0	1	0	1
EG11796	>EG11796 lplA Lipoate-protein ligase A	Cytoplasmic	A					0.677638	n.def	n.def	n.def	n.def	n.def		n.def	n.def	n.def	n.def	n.def	n.def		5.6	5.6	5.6	5.6	5.6	5.6	5.6	0	5.6	5.6	5.6	5.6	5.6	0	5.6	5.6	8.9	5.6	1	1	1	1	1	1	1	0	1	1
EG11799	>EG11799 hybA Hydrogenase 2 component, periplasmic	Peripheral inner membrane protein facing the periplasm	F2	Yes				FtsH only	FtsH only	3.05261	0.00898011	3.65636	n.def		0.696795	0.105075	0.6504	0.103795	0.453195	0.0178802		13.1	9.8	13.1	13.4	9.8	3	9.8	3	9.8	3	3	3	3	3	3	3	0	3	3	2	3	3	2	1	2	1	2	1
EG11801	>EG11801 hybC Hydrogenase 2 [Ni Fe] large subunit, periplasmic	Peripheral inner membrane protein facing the periplasm	F2		Yes	Yes		1.06458	0.843666	3.12605	0.0075044	6.79392	0.000506062		1.67073	0.134853	1.04387	0.892234	1.74402	0.0273116		7.6	26.1	19.9	11.3	28	19.4	25.2	16	26.1	11.5	15.7	21.9	19	10.4	22.2	14.1	22.4	18.9	3	8	7	3	10	7	8	7	9	4
EG11802	>EG11802 hybD Maturation endoprotease for Ni-containing hydrogenase 2	Cytoplasmic	A					n.def	n.def	n.def	n.def	n.def	n.def		n.def	n.def	n.def	n.def	n.def	n.def		0	9.8	0	0	0	6.7	0	0	0	0	0	0	0	6.7	0	0	0	0	0	1	0	0	0	1	0	0	0	0
EG11803	>EG11803 hybE Hydrogenase 2-specific chaperone	Cytoplasmic	A					n.def	n.def	n.def	n.def	n.def	n.def		n.def	n.def	n.def	n.def	n.def	n.def		0	0	0	7.4	0	0	7.4	7.4	0	0	0	0	0	0	0	0	0	0	0	0	0	1	0	0	1	1	0	0
EG11806	>EG11806 yebE Inner membrane protein, DUF533 family, function unknown	Integral Inner Membrane	B					n.def	n.def	1.53954	n.def	n.def	n.def		n.def	n.def	n.def	n.def	n.def	n.def		8.2	0	8.2	0	0	8.7	8.2	0	0	8.7	0	0	0	8.7	8.7	0	0	0	1	0	1	0	0	1	1	0	0	1
EG11808	>EG11808 yebG DNA damage-inducible gene, SOS regulon	Cytoplasmic	A					n.def	n.def	n.def	n.def	n.def	n.def		n.def	n.def	n.def	n.def	n.def	n.def		24	20.8	20.8	20.8	29.2	20.8	20.8	29.2	29.2	20.8	20.8	20.8	20.8	20.8	20.8	20.8	20.8	20.8	2	1	1	1	2	1	1	2	2	1
EG11809	>EG11809 purT Glycinamide ribonucleotide transformylase (GART) 2, non-folate-requiring, purine synthesis	Cytoplasmic	A					0.478196	n.def	0.393718	0.573162	0.234279	0.235529		n.def	n.def	0.263353	0.285097	n.def	n.def		21.2	25.5	27.8	16.3	27.3	17.9	17.9	27.3	17.3	14.5	21.4	19.1	26.8	26.8	19.1	25.3	17.9	16.3	5	6	7	5	7	4	6	7	6	5
EG11810	>EG11810 gcvP Glycine dehydrogenase (decarboxylating)	Peripheral inner membrane protein facing the cytoplasm	F1	Yes		Yes		4.07884	0.00752851	1.27998	0.353226	3.53294	0.0157373		0.372551	0.45224	1.4166	0.729958	0.527756	0.253108		14.5	38.1	34.9	30.5	37	29.6	33.1	26.8	37.1	22	28	28.9	20.3	21	33.2	21.9	23.5	24.6	10	23	21	16	21	18	18	16	21	16
EG11816	>EG11816 ispF 2-C-methyl-D-erythritol 2,4-cyclodiphosphate (MECP) synthase	Cytoplasmic	A					1.57756	n.def	1.74913	n.def	n.def	n.def		n.def	n.def	n.def	n.def	n.def	n.def		6.3	6.3	6.3	25.2	0	11.9	0	0	0	0	6.3	6.3	11.9	6.3	6.3	6.3	6.3	0	1	1	1	2	0	2	0	0	0	0
EG11817	>EG11817 surE Nucleotidase, 5- or 3-monophosphates	Cytoplasmic	A					n.def	n.def	n.def	n.def	n.def	n.def		n.def	n.def	n.def	n.def	n.def	n.def		11.5	0	5.9	0	5.9	0	5.5	11.5	0	0	0	0	5.5	0	0	0	0	5.1	2	0	1	0	1	0	1	2	0	0
EG11819	>EG11819 purU Formyltetrahydrofolate hydrolase	Cytoplasmic	A		Yes	Yes		4.48679	0.174754	3.35826	0.0176816	3.93657	0.000545549		0.798141	0.704107	1.17354	0.760703	0.936652	0.800414		11.8	21.1	21.1	26.4	21.1	11.8	26.4	21.1	21.1	16.4	5.7	17.1	11.8	11.8	21.1	11.8	21.1	11.8	3	4	4	5	4	3	5	4	4	4
EG11820	>EG11820 yceI Secreted protein, function unknown	Periplasmic	G					n.def	n.def	0.92004	n.def	1.91961	n.def		n.def	n.def	n.def	n.def	n.def	n.def		0	0	8.9	8.9	0	15.2	6.3	20.9	8.9	6.3	6.8	15.2	20.9	20.9	8.9	0	12	0	0	0	1	1	0	2	1	3	1	1
EG11823	>EG11823 amiA N-acetylmuramyl-L-alanine amidase, periplasmic	Periplasmic	G					n.def	n.def	n.def	n.def	n.def	n.def		n.def	n.def	n.def	n.def	n.def	n.def		3.8	4.2	4.2	4.2	4.2	0	4.2	0	11.4	0	6.2	0	0	0	4.2	0	0	0	1	1	1	1	1	0	1	0	2	0
EG11828	>EG11828 mobB Molybdenum cofactor biosynthesis adaptor protein	Nucleoid	N					n.def	n.def	0.14878	n.def	n.def	n.def		n.def	n.def	n.def	n.def	n.def	n.def		12.6	33.1	9.1	30.3	21.1	17.7	45.7	17.7	34.3	7.4	0	12	13.1	12	12	4.6	7.4	0	3	4	1	5	3	3	6	3	4	1
EG11829	>EG11829 mobA Molybdopterin guanine dinucleotide synthesis	Cytoplasmic	A					n.def	n.def	n.def	n.def	n.def	n.def		n.def	n.def	n.def	n.def	n.def	n.def		0	0	0	0	0	0	0	5.7	0	0	0	0	0	7.2	0	0	0	7.2	0	0	0	0	0	0	0	1	0	0
EG11830	>EG11830 yihD Function unknown, DUF1040 family	Cytoplasmic	A					n.def	n.def	0.922217	n.def	1.00391	n.def		n.def	n.def	n.def	n.def	n.def	n.def		37.1	23.6	23.6	23.6	23.6	23.6	37.1	47.2	23.6	0	13.5	0	23.6	0	37.1	13.5	47.2	47.2	2	1	1	1	1	1	2	3	1	0
EG11831	>EG11831 srkA Stress response kinase A, MazF antagonist	Cytoplasmic	A					7.4441	n.def	7.77868	n.def	n.def	n.def		n.def	n.def	n.def	n.def	n.def	n.def		4.3	0	0	4	4	0	4	4	4	7.9	4	0	4	0	4	0	4	4	1	0	0	1	1	0	1	1	1	2
EG11836	>EG11836 hemN Coproporphyrinogen III oxidase, oxygen-independent, required for cytochrome B and cytochrome C synthesis during anaerobic growth	Cytoplasmic	A					1.86687	n.def	2.33829	n.def	2.45282	n.def		n.def	n.def	n.def	n.def	n.def	n.def		0	12.3	0	5.5	0	0	9.2	2.2	0	1.5	3.7	3.7	3.7	0	3.7	1.5	3.7	3.7	0	3	0	1	0	0	3	1	0	1
EG11837	>EG11837 typA GTPase, regulatory, ribosome-associated	Peripheral inner membrane protein facing the cytoplasm	F1	Yes		Yes		3.43819	0.0173784	2.12099	0.310721	4.60051	0.0293742		0.611157	0.263135	0.706059	0.240213	0.431513	0.00837735		20.4	38.4	23.2	22.1	22.1	22.7	31.6	20.4	22.1	24.1	19.4	29	20.3	18.3	25	21.6	29	22.1	12	18	13	12	13	12	18	11	13	12
EG11849	>EG11849 yihW Predicted transcriptional regulator, function unknown	Nucleoid	N	Yes		Yes		2.20914	0.0275924	2.22419	0.0828793	2.68452	0.04314		1.10499	0.769332	1.50446	0.374589	1.66242	0.0756815		33.7	38.7	32.6	27.2	33	27.6	48.7	36.4	34.5	21.5	13.8	11.9	15.7	16.9	16.9	19.5	11.1	14.9	8	8	8	6	8	6	11	7	8	5
EG11852	>EG11852 dtd D-tyrosine tRNA deacylase	Cytoplasmic	A					n.def	n.def	1.07199	n.def	n.def	n.def		n.def	n.def	n.def	n.def	n.def	n.def		0	4.8	0	7.6	0	0	7.6	0	12.4	0	0	7.6	7.6	4.8	0	4.8	4.8	0	0	1	0	1	0	0	1	0	2	0
EG11853	>EG11853 yiiD Predicted acetyltransferase, function unknown	Integral Inner Membrane	B					n.def	n.def	n.def	n.def	n.def	n.def		n.def	n.def	n.def	n.def	n.def	n.def		5.5	0	5.5	0	0	0	0	3.3	3.6	0	0	3.3	0	5.5	0	0	0	5.5	1	0	1	0	0	0	0	1	1	0
EG11857	>EG11857 fdoH Formate dehydrogenase-O Fe-S subunit, aerobic	Peripheral inner membrane protein facing the cytoplasm	F1					n.def	n.def	n.def	n.def	n.def	n.def		n.def	n.def	n.def	n.def	n.def	n.def		7.3	4.3	0	4.3	4.3	4.3	10.7	6.3	6.3	0	0	0	0	0	0	0	0	0	2	1	0	1	1	1	2	1	1	0
EG11858	>EG11858 fdoG Formate dehydrogenase-O, selenopeptide, aerobic	Periplasmic	G					n.def	n.def	n.def	n.def	24.7276	n.def		n.def	n.def	n.def	n.def	n.def	n.def		0	0	0	0	2.1	2.1	2.1	3	0	0	0	0	0	0	0	0	0.7	0	0	0	0	0	1	1	1	2	0	0
EG11870	>EG11870 yiiM 6-N-hydroxylaminopurine resistance, function unknown	Cytoplasmic	A					n.def	n.def	n.def	n.def	n.def	n.def		n.def	n.def	n.def	n.def	n.def	n.def		0	5.4	0	0	5.4	0	5.4	0	5.4	0	0	0	0	0	0	0	0	0	0	1	0	0	1	0	1	0	1	0
EG11871	>EG11871 gph Phosphoglycolate phosphatase	Cytoplasmic	A					n.def	n.def	n.def	n.def	n.def	n.def		n.def	n.def	n.def	n.def	n.def	n.def		0	0	0	5.6	5.6	5.6	5.6	11.5	11.5	5.6	5.6	5.6	5.6	12.7	10.3	6	5.6	5.6	0	0	0	1	1	1	1	2	2	1
EG11877	>EG11877 uspD Stress-induced protein	Peripheral inner membrane protein facing the cytoplasm	F1			Yes		n.def	n.def	1.76753	0.0393735	FtsH only	FtsH only		2.31629	0.0736487	1.20291	0.414123	2.7863	0.0456683		9.2	9.2	9.2	9.2	18.3	18.3	18.3	18.3	18.3	0	0	0	9.2	9.2	9.2	9.2	9.2	9.2	1	1	1	1	2	2	2	2	2	0
EG11878	>EG11878 zapB FtsZ stabilizer, coiled-coil protein	Peripheral inner membrane protein facing the cytoplasm	F1					n.def	n.def	n.def	n.def	n.def	n.def		n.def	n.def	n.def	n.def	n.def	n.def		0	0	0	0	0	0	0	18.5	11.1	0	0	0	0	0	0	0	0	0	0	0	0	0	0	0	0	1	1	0
EG11879	>EG11879 rraA Protein inhibitor of RNase E, modulates global mRNA abundance		N, F1					n.def	n.def	n.def	n.def	1.33878	n.def		n.def	n.def	n.def	n.def	n.def	n.def		6.8	6.8	6.8	6.8	13.7	13.7	6.8	13.7	13.7	6.8	13.7	24.2	6.8	13.7	13.7	6.8	24.2	13.7	1	1	1	1	2	2	1	2	2	1
EG11881	>EG11881 hslU Heat-inducible ATP-dependent protease HslVU, ATPase subunit	Peripheral inner membrane protein facing the cytoplasm	F1	Yes	Yes	Yes		9.28796	0.000576297	18.278	3.8727e-05	19.9318	1.68589e-05		1.51612	0.0437337	1.04451	0.608185	1.5836	0.0298227		36.6	44.5	35.9	52.4	40.6	38.8	51.9	43.6	44.9	28.9	22.6	40	41.5	30.7	34.1	27.8	42	28	14	17	14	19	15	14	18	16	16	12
EG11885	>EG11885 opgG Osmoregulated periplasmic glucan (OPG) biosynthesis	Periplasmic	G					1.41796	0.0546597	0.655811	0.284843	0.978997	0.849869		0.764493	0.200371	0.803724	0.00696372	0.614441	0.033		4.1	11	6.7	11.2	16	11.2	14.3	7.2	7.2	11.4	16.2	14.7	19.6	9.8	12.3	7.2	6.7	11	2	4	3	5	5	5	5	3	3	4
EG11886	>EG11886 opgH Membrane glycosyltransferase, OPG biosynthesis	Integral Inner Membrane	B					n.def	n.def	n.def	n.def	1.10414	n.def		n.def	n.def	n.def	n.def	n.def	n.def		0	0	0	0	0	4	0	3.7	0	0	0	0	0	0	0	1.9	0	0	0	0	0	0	0	2	0	2	0	0
EG11887	>EG11887 trxC Thioredoxin 2, zinc-binding	Cytoplasmic	A					2.27686	n.def	n.def	n.def	n.def	n.def		n.def	n.def	n.def	n.def	n.def	n.def		7.9	7.9	0	0	9.4	0	9.4	9.4	9.4	17.3	17.3	25.2	0	7.9	7.9	9.4	9.4	9.4	1	1	0	0	1	0	1	1	1	2
EG11897	>EG11897 rpoE RNA polymerase subunit, extracytoplasmic stress sigma E	Nucleoid, Peripheral inner membrane protein facing the cytoplasm	N,F1			Yes		2.2218	n.def	n.def	n.def	FtsH only	FtsH only		n.def	n.def	n.def	n.def	0.647871	0.116168		8.9	26.7	5.2	5.2	14.1	14.1	25.7	22	20.4	14.1	20.4	25.7	20.4	14.1	20.4	25.7	20.4	8.9	1	3	1	1	2	2	3	3	2	2
EG11904	>EG11904 gldA Glycerol dehydrogenase, NAD+ dependent	Cytoplasmic	A			Yes		1.89386	n.def	1.8428	0.0582686	FtsH only	FtsH only		n.def	n.def	0.876999	0.629831	n.def	n.def		2.7	0	0	11.7	12.3	2.7	7.6	6	16.6	2.7	0	0	7.6	4.4	7.9	0	0	4.4	1	0	0	3	4	1	3	2	5	1
EG11914	>EG11914 eptC LPS heptose I phosphoethanolamine transferase	Integral Inner Membrane	B		Yes	Yes		4.46564	0.123996	5.19757	0.0307524	3.66758	0.0169564		1.05439	0.898788	0.806325	0.472752	0.850181	0.614077		10.4	17	21	14.6	21.1	20.6	13.9	19.4	20.3	13.2	12	16.8	8.8	15.3	10.9	11.6	9.5	13.5	5	8	10	7	10	10	6	9	9	6
EG11915	>EG11915 nfi Endonuclease V, specific for single-stranded DNA or duplex DNA with damaged U	Nucleoid	N					n.def	n.def	n.def	n.def	n.def	n.def		n.def	n.def	n.def	n.def	n.def	n.def		0	0	0	0	0	0	0	0	0	0	0	5.4	0	0	0	0	13	0	0	0	0	0	0	0	0	0	0	0
EG11916	>EG11916 yjaG Function unknown	Cytoplasmic	A					n.def	n.def	n.def	n.def	n.def	n.def		n.def	n.def	n.def	n.def	n.def	n.def		13.8	0	13.8	6.6	6.6	6.6	0	6.6	0	13.8	6.6	13.8	6.6	6.6	13.8	6.6	6.6	13.8	2	0	2	1	1	1	0	1	0	2
EG11921	>EG11921 rluF 23S rRNA pseudouridine(2604) synthase	Peripheral inner membrane protein facing the cytoplasm	F1					0.36342	n.def	n.def	n.def	n.def	n.def		n.def	n.def	n.def	n.def	n.def	n.def		9	0	4.1	0	4.1	0	0	4.1	4.1	0	0	9	4.1	0	0	4.1	4.1	4.1	2	0	1	0	1	0	0	1	1	0
EG11932	>EG11932 dusA tRNA-dihydrouridine synthase A	Peripheral inner membrane protein facing the cytoplasm	F1					n.def	n.def	0.924343	n.def	n.def	n.def		n.def	n.def	n.def	n.def	n.def	n.def		8.2	4.2	0	8.2	0	0	8.2	4.2	4.2	4.2	0	8.2	12.1	7.3	8.2	4.2	8.2	0	2	1	0	2	0	0	2	1	1	1
EG11935	>EG11935 yjbQ Multicopy suppressor of thiE and pdxB	Cytoplasmic	A					0.808957	0.460314	0.351166	0.0400328	0.950803	0.625774		0.827011	0.22536	1.70139	0.0329555	1.40706	0.0213334		29	23.2	23.2	40.6	45.7	15.9	45.7	29	45.7	16.7	16.7	23.2	29	15.9	29	29	23.2	23.2	3	2	2	4	4	2	4	3	4	3
EG11936	>EG11936 yjbR Function unknown	Cytoplasmic	A	Yes				FtsH only	FtsH only	n.def	n.def	0.340784	n.def		n.def	n.def	n.def	n.def	n.def	n.def		17.8	17.8	17.8	9.3	9.3	17.8	9.3	17.8	17.8	9.3	8.5	17.8	9.3	9.3	9.3	17.8	8.5	17.8	2	2	2	1	1	2	1	2	2	1
EG11939;EG13067	>EG11939 yjcD Predicted purine permease, function unknown	Integral Inner Membrane	B					n.def	n.def	n.def	n.def	n.def	n.def		n.def	n.def	0.909457	0.904057	n.def	n.def		4.5	2.2	2.2	12.2	6.7	4.5	12.2	4.5	12.2	4.5	4.5	4.5	4.5	4.5	4.5	4.5	4.5	4.5	1	1	1	2	2	1	2	1	2	1
EG11940	>EG11940 yjcE Function unknown	Integral Inner Membrane	B					n.def	n.def	n.def	n.def	n.def	n.def		n.def	n.def	n.def	n.def	n.def	n.def		0	0	0	0	2.6	2.6	0	0	2.6	0	0	0	0	0	0	0	0	0	0	0	0	0	1	1	0	0	1	0
EG11960	>EG11960 rpe D-ribulose-5-phosphate 3-epimerase	Cytoplasmic	A					0.698659	n.def	0.42264	n.def	0.764366	n.def		n.def	n.def	n.def	n.def	n.def	n.def		10.7	10.7	10.7	10.7	6.7	21.8	4	10.7	6.7	4	23.6	10.7	10.7	4	34.7	10.7	10.7	10.7	2	2	2	2	1	2	1	2	1	1
EG11963	>EG11963 lldD L-lactate dehydrogenase, FMN dependent	Peripheral inner membrane protein facing the cytoplasm	F1	Yes	Yes	Yes		FtsH only	FtsH only	FtsH only	FtsH only	FtsH only	FtsH only		0.977142	0.952865	0.710149	0.494431	0.693916	0.417487		14.1	10.9	7.6	10.1	6.8	10.6	21	20.7	10.1	0	0	0	0	0	0	4	0	0	4	3	2	3	2	3	7	7	3	0
EG11964	>EG11964 yibL Ribosome-associated protein, function unknown	Cytoplasmic	A					n.def	n.def	n.def	n.def	n.def	n.def		n.def	n.def	n.def	n.def	n.def	n.def		0	0	0	0	0	7.5	11.7	11.7	7.5	7.5	7.5	18.3	19.2	19.2	19.2	7.5	7.5	24.2	0	0	0	0	0	1	1	1	1	1
EG11971	>EG11971 nupC Nucleoside transporter, except guanosine	Integral Inner Membrane	B			Yes		n.def	n.def	n.def	n.def	FtsH only	FtsH only		n.def	n.def	n.def	n.def	n.def	n.def		0	12.8	5.5	5.5	12.8	7.2	9	11	11	8.5	5.5	5.2	9	3.5	12.8	9	3.5	9.2	0	4	1	1	4	2	2	3	3	3
EG11978;EG11454	>EG11978 rfbA Glucose-1-phosphate thymidylyltransferase 1	Periplasmic	G					0.40653	n.def	1.4144	n.def	0.576752	n.def		n.def	n.def	n.def	n.def	n.def	n.def		7.5	7.5	7.5	7.8	2.7	11.9	3.4	3.4	3.4	8.9	3.4	8.9	5.5	3.4	17.7	3.4	7.5	8.9	2	2	2	2	1	3	1	1	1	2
EG12005	>EG12005 yehS Function unknown, DUF1456 family	Cytoplasmic	A					n.def	n.def	0.389643	n.def	n.def	n.def		n.def	n.def	n.def	n.def	n.def	n.def		0	9	0	0	0	5.1	0	0	9	0	0	0	0	0	9	9	0	0	0	1	0	0	0	1	0	0	1	0
EG12013	>EG12013 bglX Periplasmic beta-glucosidase	Periplasmic	G		Yes			0.0865776	n.def	FtsH only	FtsH only	0.675629	n.def		n.def	n.def	n.def	n.def	n.def	n.def		1.8	8	6	7.8	6.7	5.9	7.6	9.4	3.3	5.1	7.5	7.7	4.8	10.7	9	8.5	10.8	8.4	1	4	4	5	4	4	4	6	2	3
EG12035	>EG12035 yeiP Elongation factor P-like protein, function unknown	Cytoplasmic	A					0.725025	n.def	0.54923	n.def	n.def	n.def		n.def	n.def	n.def	n.def	n.def	n.def		19.5	19.5	19.5	0	19.5	19.5	19.5	0	19.5	0	5.3	12.6	0	5.3	19.5	17.4	17.4	24.7	2	2	2	0	2	2	2	0	2	0
EG12041	>EG12041 yejF Microcin C transporter YejABEF, ATP-binding subunit	Peripheral inner membrane protein facing the cytoplasm	F1					3.05749	n.def	2.67788	n.def	1.77812	n.def		n.def	n.def	n.def	n.def	n.def	n.def		0	0	2.8	2.8	2.8	2.8	2.8	2.8	0	2.8	0	0	0	2.8	0	0	2.8	0	0	0	1	1	1	1	1	1	0	1
EG12042	>EG12042 yejG Function unknown	Cytoplasmic	A					n.def	n.def	n.def	n.def	n.def	n.def		n.def	n.def	n.def	n.def	n.def	n.def		14	0	14	0	0	0	0	0	0	0	14	0	0	0	0	0	0	0	1	0	1	0	0	0	0	0	0	0
EG12044	>EG12044 rsuA 16S rRNA pseudouridine(516) synthase	Cytoplasmic	A	Yes	Yes	Yes		2.99969	0.00799792	5.25993	0.0105536	5.41685	0.00661283		0.967812	0.901822	0.764582	0.0742877	0.739971	0.199172		35.9	50.6	43.7	48.1	48.1	30.3	48.1	39	64.5	24.2	30.3	39.4	15.6	24.2	48.1	24.2	15.6	21.6	7	10	7	8	8	6	8	8	11	5
EG12048	>EG12048 yejK Spermidine nucleoid-associated protein, function unknown	Nucleoid	N	Yes				FtsH only	FtsH only	9.17773	n.def	4.08422	n.def		0.833536	0.553807	0.803298	0.444581	0.669578	0.0465189		12.2	27.2	22.4	23	18.5	5.7	19.4	14.3	31.6	3.9	13.1	3.9	13.7	0	17.9	5.1	10.7	9.6	3	6	5	5	4	1	4	3	7	1
EG12069	>EG12069 mqo Malate oxidoreductase	Peripheral inner membrane protein facing the cytoplasm	F1	Yes		Yes		4.35332	0.000323556	4.23208	0.541796	3.03005	0.00558988		0.341693	0.230214	1.11484	0.838837	0.380933	0.00570057		9.9	14.6	11.1	8.8	10.8	13.7	8.6	4.4	13.3	8	6.4	8.2	13.1	15.3	9.9	11.5	6.2	7.7	5	7	5	4	5	6	4	2	6	4
EG12079	>EG12079 nikE Nickel transport ATP-binding protein	Peripheral inner membrane protein facing the cytoplasm	F1					1.68877	n.def	3.50667	0.00106485	4.89228	n.def		1.63508	0.0780837	1.09852	0.562034	1.79616	0.0445974		6.7	6.7	6.7	6.7	6.7	6.7	6.7	6.7	6.7	6.7	0	6.7	6.7	6.7	6.7	0	6.7	0	1	1	1	1	1	1	1	1	1	1
EG12082	>EG12082 nuoA NADH:ubiquinone oxidoreductase subunit A, complex I	Integral Inner Membrane	B					1.40776	n.def	n.def	n.def	8.22425	n.def		n.def	n.def	n.def	n.def	n.def	n.def		0	0	6.8	0	0	10.2	0	0	10.2	10.2	10.2	0	0	0	0	10.2	10.2	0	0	0	1	0	0	1	0	0	1	1
EG12083	>EG12083 nuoB NADH:ubiquinone oxidoreductase subunit B, complex I	Peripheral inner membrane protein facing the cytoplasm	F1	Yes	Yes	Yes		3.95594	0.00767941	3.02624	0.00922123	5.36239	0.000437828		0.654656	0.148286	0.794211	0.238599	0.519935	0.00801652		25.5	33.6	27.3	23.2	23.2	16.8	23.2	16.8	23.2	20.9	29.5	23.2	16.8	23.2	23.2	12.7	16.8	20.9	6	7	6	5	5	4	5	4	5	5
EG12084	>EG12084 nuoC NADH:ubiquinone oxidoreductase, fused CD subunit, complex I	Peripheral inner membrane protein facing the cytoplasm	F1	Yes	Yes	Yes		4.92312	0.0010574	3.87971	0.00781459	5.14251	0.000122352		0.652773	0.338436	0.904715	0.737023	0.590574	0.0260328		21.8	33.1	25.5	26.7	31.7	21.3	28	19.8	33.1	25.7	30.4	31.7	27.7	25.7	28	27.5	27.2	28.5	12	17	14	13	16	11	14	11	17	14
EG12086	>EG12086 nuoE NADH:ubiquinone oxidoreductase subunit E, complex I	Peripheral inner membrane protein facing the cytoplasm	F1					2.20021	0.0667676	0.592423	0.236719	0.48399	0.0753874		0.314964	0.0239109	0.44238	0.0530756	0.139334	0.0100413		19.3	28.3	28.3	28.3	19.9	19.3	28.3	19.3	19.3	32.5	28.3	19.9	28.3	27.7	28.3	28.3	28.3	19.9	2	4	4	4	3	2	4	2	2	4
EG12087	>EG12087 nuoG NADH:ubiquinone oxidoreductase subunit G, complex I	Peripheral inner membrane protein facing the cytoplasm	F1	Yes	Yes	Yes		6.11847	0.0304426	5.05256	0.00451838	6.46433	0.000293823		0.534344	0.334754	1.00834	0.985062	0.538798	0.0170561		18.6	39.1	28.9	24.6	31.3	24.4	34.1	19.8	26.7	16.4	20	23.1	22.7	14.6	33.6	22.9	26.9	22.7	14	22	19	15	19	16	20	14	18	13
EG12088	>EG12088 nuoH NADH:ubiquinone oxidoreductase subunit H, complex I	Integral Inner Membrane	B					1.15246	n.def	0.44871	n.def	n.def	n.def		n.def	n.def	0.557579	0.280762	n.def	n.def		2.5	9.5	7.1	4.9	2.5	4.9	2.5	4.9	2.5	2.5	4.9	7.1	9.5	2.5	4.9	2.5	2.5	2.5	1	3	2	2	1	2	1	2	1	1
EG12089	>EG12089 nuoI NADH:ubiquinone oxidoreductase subunit I, complex I	Peripheral inner membrane protein facing the cytoplasm	F1					1.73165	0.194573	1.77702	0.353249	3.29667	0.056148		1.08229	0.743118	0.746417	0.0867017	0.807842	0.338123		25.6	35	35	35	19.4	19.4	15	12.8	21.1	19.4	25.6	28.9	11.1	19.4	25.6	19.4	19.4	25.6	4	5	5	5	3	3	2	2	3	4
EG12091	>EG12091 nuoK NADH:ubiquinone oxidoreductase subunit K, complex I	Integral Inner Membrane	B					8.24301	n.def	n.def	n.def	n.def	n.def		n.def	n.def	n.def	n.def	n.def	n.def		0	13	0	12	12	12	0	12	12	0	0	12	0	0	0	12	0	0	0	2	0	1	1	1	0	1	1	0
EG12092	>EG12092 nuoL NADH:ubiquinone oxidoreductase subunit L, complex I	Integral Inner Membrane	B					2.42777	n.def	0.747293	n.def	0.21984	n.def		n.def	n.def	n.def	n.def	n.def	n.def		2.4	2.4	2.4	2.4	2.4	2.4	0	2.4	0	0	2.4	0	2.4	2.4	2.4	0	2.4	2.4	1	1	1	1	1	1	0	1	0	0
EG12093	>EG12093 nuoN NADH:ubiquinone oxidoreductase subunit N, complex I	Integral Inner Membrane	B					n.def	n.def	4.31404	n.def	3.19152	n.def		n.def	n.def	n.def	n.def	n.def	n.def		0	2.3	2.3	2.3	2.3	0	0	0	2.3	2.3	2.3	2.3	2.3	0	2.3	2.3	0	2.3	0	1	1	1	1	0	0	0	1	1
EG12095	>EG12095 secG SecYEG inner membrane translocon secA-interacting subunit	Integral Inner Membrane	B					3.84239	0.0185267	7.99184	0.00168647	10.2826	0.000256796		1.03443	0.889435	0.734261	0.234297	0.759543	0.280078		16.4	16.4	16.4	16.4	16.4	16.4	16.4	16.4	16.4	16.4	16.4	16.4	16.4	16.4	16.4	16.4	16.4	16.4	1	1	1	1	1	1	1	1	1	1
EG12098	>EG12098 rluD 23S rRNA pseudouridine(1911,1915,1917) synthase	Cytoplasmic	A					2.2065	n.def	n.def	n.def	2.46992	n.def		n.def	n.def	n.def	n.def	n.def	n.def		0	4.6	11.3	14.1	4.6	11	8.9	4	10.7	2.1	11.3	14.1	4.6	11.3	11.3	11.3	6.7	11.3	0	1	2	2	1	2	2	1	2	1
EG12099	>EG12099 efp Polyproline-specific translation elongation factor EF-P	Cytoplasmic	A					1.8495	0.0359313	2.64206	0.476522	2.59452	0.153438		0.841575	0.440416	0.900146	0.55261	0.75754	0.255464		30.9	21.8	30.9	21.8	17	30.9	30.9	30.9	30.9	24.5	15.4	30.9	30.9	24.5	30.9	21.8	30.9	30.9	5	4	5	4	3	5	5	5	5	4
EG12100	>EG12100 tktB Transketolase B	Peripheral inner membrane protein facing the cytoplasm	F1					n.def	n.def	n.def	n.def	n.def	n.def		n.def	n.def	n.def	n.def	n.def	n.def		1.3	0	1.3	1.6	1.3	2.5	0	0	3.3	0	4.9	3.3	3.3	1.9	1.9	1.3	4.9	3.3	0	0	0	1	0	1	0	0	0	0
EG12104	>EG12104 yeiR Zn-stimulated GTPase involved in zinc homeostasis	Cytoplasmic	A	Yes				FtsH only	FtsH only	n.def	n.def	n.def	n.def		1.0317	0.917884	n.def	n.def	n.def	n.def		25.6	17.7	11.9	18.3	9.1	4	10.7	6.1	0	16.2	0	0	5.5	0	0	0	0	0	7	4	2	5	3	1	3	2	0	4
EG12105	>EG12105 yeiE Putative positive regulator of lysP transcription	Nucleoid	N					3.46826	n.def	1.20316	0.686149	1.52244	0.698811		n.def	n.def	0.507087	0.267961	n.def	n.def		36.9	39.2	36.9	45.4	36.9	31.4	45.7	26.6	36.5	23.2	28	27.6	36.9	21.2	36.5	28	36.5	27.6	8	9	8	8	8	7	9	5	7	4
EG12110	>EG12110 ydcF SAM-binding protein, function unknown	Cytoplasmic	A					n.def	n.def	n.def	n.def	n.def	n.def		n.def	n.def	1.79474	0.203691	n.def	n.def		9.8	5.3	9.4	18.4	9.4	4.1	14.3	5.3	9.4	0	0	0	0	5.3	0	0	0	0	2	1	2	4	2	1	3	1	2	0
EG12111	>EG12111 nlpD Activator of AmiC murein hydrolase activity, lipoprotein	Outer Membrane Lipoprotein	I			Yes		0.763746	n.def	n.def	n.def	FtsH only	FtsH only		n.def	n.def	n.def	n.def	n.def	n.def		0	5.8	3.4	3.4	5.8	3.4	5.8	5.8	8.2	3.4	5.8	3.4	3.4	3.4	5.8	3.4	3.4	3.4	0	2	1	1	2	1	2	2	3	1
EG12114	>EG12114 prfC Peptide chain release factor 3, RF-3	Cytoplasmic	A					1.38703	n.def	1.61561	0.21549	1.58833	0.566645		n.def	n.def	0.827949	0.739427	n.def	n.def		7.6	15.5	20.4	12.7	17.6	16.6	17.8	16.6	17.6	7.2	9.3	9.5	10	7.2	7.6	6.4	10.4	12.3	2	5	7	4	6	6	6	6	6	3
EG12123	>EG12123 lrhA Transcriptional repressor of motility master regulator flhDC	Nucleoid	N					n.def	n.def	n.def	n.def	n.def	n.def		n.def	n.def	n.def	n.def	n.def	n.def		9	2.9	5.1	5.1	5.1	5.1	5.1	0	5.1	0	0	0	0	0	0	0	0	0	2	1	1	1	1	1	1	0	1	0
EG12124	>EG12124 hisJ Histidine-binding periplasmic protein	Periplasmic	G					0.702779	0.355869	1.38861	0.565264	0.528977	0.404976		1.68397	0.172769	0.500006	0.413829	0.841998	0.784303		42.3	29.2	24.6	20.8	20.8	17.7	31.2	12.3	31.9	15.8	24.6	36.2	36.2	22.3	25	19.6	19.6	21.2	8	5	4	3	3	4	5	2	5	3
EG12125	>EG12125 hisQ Histidine transport permease	Integral Inner Membrane	B					n.def	n.def	n.def	n.def	n.def	n.def		n.def	n.def	n.def	n.def	n.def	n.def		6.6	6.6	0	0	6.6	6.6	6.6	0	0	0	0	0	0	0	0	0	6.6	6.6	1	1	0	0	1	1	1	0	0	0
EG12127	>EG12127 treB Trehalose permease PTS EIIBC component	Integral Inner Membrane	B			Yes		n.def	n.def	n.def	n.def	FtsH only	FtsH only		n.def	n.def	n.def	n.def	n.def	n.def		0	0	2.3	2.1	6.1	5.7	4	4.4	3.8	0	0	0	0	0	0	0	0	0	0	0	1	1	3	3	2	2	2	0
EG12128	>EG12128 lgt Phosphatidylglycerol:prolipoprotein diacylglycerol transferase	Integral Inner Membrane	B					n.def	n.def	n.def	n.def	n.def	n.def		n.def	n.def	n.def	n.def	n.def	n.def		0	5.2	0	0	0	0	5.2	0	0	0	0	0	5.2	0	5.2	5.2	0	0	0	1	0	0	0	0	1	0	0	0
EG12130	>EG12130 hscA Hsc66, DnaK-like chaperone, specific for IscU	Cytoplasmic	A		Yes	Yes		1.94143	0.0311235	2.04496	0.0175	2.49916	0.0275469		0.895837	0.606189	0.74781	0.03218	0.669916	0.0903479		15.7	28.4	26.9	19.2	20.8	17	24.2	23.1	20.5	8.8	13	10.2	12.8	13.3	25	13	26.5	26.6	5	10	9	6	7	6	8	8	7	4
EG12131	>EG12131 hscB Hsc20, DnaJ-like co-chaperone for HscA	Cytoplasmic	A					0.747613	n.def	0.665635	n.def	0.651638	n.def		n.def	n.def	2.43785	0.368335	n.def	n.def		0	13.5	13.5	6.4	22.2	6.4	6.4	6.4	29.2	6.4	6.4	6.4	22.2	6.4	15.8	6.4	15.8	0	0	2	2	1	2	1	1	1	3	1
EG12132	>EG12132 iscA Recruit and deliver Fe for Fe-S cluster assembly in IscU	Cytoplasmic	A		Yes	Yes		2.64772	0.362702	4.34274	5.63982e-05	FtsH only	FtsH only		0.829187	0.379859	0.476005	0.00336008	0.394697	0.00289311		17.8	30.8	17.8	30.8	17.8	17.8	30.8	30.8	30.8	17.8	7.5	30.8	30.8	17.8	17.8	17.8	7.5	7.5	2	3	2	3	2	2	3	3	3	2
EG12133	>EG12133 ucpA Furfural resistance, predicted oxidoreductase, COG1028 family	Cytoplasmic	A					4.0326	n.def	2.23545	n.def	2.19201	n.def		n.def	n.def	n.def	n.def	n.def	n.def		11	0	0	4.6	4.6	0	4.6	0	0	0	0	4.6	0	0	4.6	0	4.6	0	2	0	0	1	1	0	1	0	0	0
EG12135	>EG12135 ompX Outer membrane protein X	Outer Membrane b-barrel protein	H		Yes	Yes		1.84978	0.169188	2.60962	0.000692409	2.98588	0.000455684		1.01889	0.921403	0.665213	0.017527	0.677781	0.0797635		43.9	48	53.8	60.8	39.8	25.7	24.6	43.3	22.8	31	38	43.9	38	28.7	43.9	35.1	62.6	38.6	8	7	9	6	7	4	3	4	3	4
EG12142	>EG12142 sdaC Serine:H+ symport permease, threonine-insensitive	Integral Inner Membrane	B					n.def	n.def	n.def	n.def	n.def	n.def		n.def	n.def	n.def	n.def	n.def	n.def		2.1	0	0	4.7	0	0	4.7	0	4.7	0	2.3	2.3	0	0	0	0	0	2.3	1	0	0	1	0	0	1	0	1	0
EG12144	>EG12144 pgm Phosphoglucomutase	Cytoplasmic	A					1.19381	0.753332	0.578695	n.def	0.286104	0.0113285		0.877487	0.614456	0.612567	0.0522457	0.537519	0.0683488		17.9	9.9	12.5	2	11.4	10.6	13.4	9.5	13.4	11.7	12.6	10.6	9	8.2	13.4	14.3	17	15.9	7	4	5	1	4	4	5	4	5	5
EG12146	>EG12146 yhbJ Adaptor protein RapZ for GlmZ/GlmY sRNA degradation	Peripheral inner membrane protein facing the cytoplasm	F1					n.def	n.def	n.def	n.def	n.def	n.def		0.797674	0.623589	n.def	n.def	n.def	n.def		6.7	11.3	6.7	11.3	6.7	6.7	22.2	0	11.3	0	0	0	0	0	0	0	0	0	1	2	1	2	1	1	3	0	2	0
EG12158	>EG12158 rdgC Competitive inhibitor of RecA function	Nucleoid	N					0.832993	n.def	0.204221	n.def	0.586652	n.def		n.def	n.def	n.def	n.def	0.749246	0.448039		3.3	3.3	3.3	8.9	8.9	3.3	3.3	8.9	5.6	3.3	0	5.9	12.2	3.3	2.6	8.9	3.3	11.6	1	1	1	2	2	1	1	2	1	1
EG12159	>EG12159 yaiE Function unknown, UPF0345 family	Cytoplasmic	A					n.def	n.def	n.def	n.def	0.651704	n.def		n.def	n.def	n.def	n.def	n.def	n.def		11.7	11.7	0	0	11.7	0	11.7	11.7	11.7	11.7	11.7	11.7	11.7	11.7	11.7	11.7	11.7	0	1	1	0	0	1	0	1	1	1	1
EG12163	>EG12163 rsmB 16S rRNA m(5)C967 methyltransferase, SAM-dependent	Integral Inner Membrane	B					n.def	n.def	n.def	n.def	n.def	n.def		n.def	n.def	n.def	n.def	n.def	n.def		1.9	0	3.7	6.5	2.8	10	3.7	0	3.7	3.7	0	3.7	2.8	2.8	0	0	10	10	1	0	1	2	1	2	1	0	1	1
EG12164	>EG12164 ytjC Phosphatase, function unknown	Integral Inner Membrane	B					8.83537	n.def	n.def	n.def	n.def	n.def		n.def	n.def	n.def	n.def	n.def	n.def		16.3	6	6	6	6	6	6	6	6	25.6	16.3	6	6	6	6	6	6	6	3	1	1	1	1	1	1	1	1	5
EG12165	>EG12165 mukF Chromosome condensin MukBEF, kleisin-like subunit, binds calcium	Nucleoid, Peripheral inner membrane protein facing the cytoplasm	N,F1					0.222818	n.def	n.def	n.def	n.def	n.def		n.def	n.def	n.def	n.def	n.def	n.def		2	5	8.4	0	3.2	3.2	0	0	3.2	3.2	0	4.3	4.8	3.2	0	3.2	0	2	1	2	3	0	1	1	0	0	1	1
EG12167	>EG12167 smtA Putative methyltransferase, SAM-dependent, Hns-regulated	Cytoplasmic	A					n.def	n.def	n.def	n.def	n.def	n.def		n.def	n.def	n.def	n.def	n.def	n.def		0	0	0	0	0	0	0	0	0	0	5.4	0	0	5.4	0	0	5.4	0	0	0	0	0	0	0	0	0	0	0
EG12168	>EG12168 brnQ Branched-chain amino acid transport system 2 carrier protein	Integral Inner Membrane	B					n.def	n.def	n.def	n.def	3.95612	n.def		n.def	n.def	n.def	n.def	n.def	n.def		0	3.2	3.2	3.2	3.2	0	0	0	3.2	3.2	3.2	3.2	3.2	0	3.2	0	3.2	3.2	0	1	1	1	1	0	0	0	1	1
EG12172	>EG12172 hinT Activator of DadA, D-alanine catabolism	Peripheral inner membrane protein facing the cytoplasm	F1			Yes		2.06628	0.0617407	1.89062	0.0108651	3.04286	0.00388093		1.1705	0.459191	0.874792	0.462148	1.02395	0.911533		33.6	62.2	33.6	33.6	32.8	32.8	32.8	32.8	32.8	45.4	32.8	33.6	33.6	61.3	32.8	32.8	33.6	32.8	4	5	3	4	3	3	3	3	3	5
EG12176	>EG12176 yjdC Putative transcriptional repressor, function unknown	Nucleoid	N					n.def	n.def	n.def	n.def	n.def	n.def		n.def	n.def	n.def	n.def	n.def	n.def		0	6.8	0	6.8	6.8	6.8	6.8	11.5	6.8	6.8	6.8	6.8	6.8	11.5	11.5	6.8	6.8	11.5	0	1	0	1	1	1	1	2	1	1
EG12177	>EG12177 cutA Copper sensitivity, binds Cu(II)	Cytoplasmic	A					n.def	n.def	0.177608	n.def	n.def	n.def		n.def	n.def	n.def	n.def	n.def	n.def		0	10.7	10.7	0	10.7	10.7	10.7	10.7	10.7	0	0	0	10.7	10.7	10.7	0	0	0	0	1	1	0	1	1	1	1	1	0
EG12178	>EG12178 dsbD Transmembrane protein-disulfide reductase, transfers electrons from cytoplasmic thioredoxin to the periplasm	Integral Inner Membrane	B					n.def	n.def	n.def	n.def	n.def	n.def		n.def	n.def	n.def	n.def	n.def	n.def		0	0	0	0	0	0	0	0	0	2.3	0	0	0	0	2.3	0	2.3	0	0	0	0	0	0	0	0	0	0	1
EG12179	>EG12179 cspE Binds and melts RNA, involved in cold acclimation	Cytoplasmic	A					0.557662	n.def	n.def	n.def	n.def	n.def		n.def	n.def	n.def	n.def	n.def	n.def		29	31.9	31.9	14.5	14.5	14.5	14.5	14.5	14.5	14.5	31.9	14.5	31.9	31.9	31.9	31.9	31.9	31.9	2	2	2	1	1	1	1	1	1	1
EG12181	>EG12181 grxD Monothiol glutaredoxin Grx4 with CGFS motif	Peripheral inner membrane protein facing the cytoplasm	F1	Yes	Yes	Yes		2.78158	0.016885	3.89225	0.000530243	4.48314	0.000607622		1.02135	0.905854	0.615065	0.019072	0.628197	0.0529753		28.7	28.7	28.7	28.7	28.7	28.7	28.7	28.7	28.7	28.7	28.7	28.7	28.7	28.7	28.7	28.7	28.7	28.7	3	3	3	3	3	3	3	3	3	3
EG12182	>EG12182 yajG Probable lipoprotein, function unknown	Outer Membrane Lipoprotein	I			Yes		9.09746	0.0510705	1.71108	n.def	FtsH only	FtsH only		0.778938	0.567354	0.922278	0.817159	0.718397	0.0597863		17.7	25	5.7	14.6	25	10.4	10.4	17.7	32.3	7.3	4.7	7.3	7.3	0	10.4	7.3	7.3	7.3	3	3	1	1	3	2	2	3	4	1
EG12184	>EG12184 nudF ADP-sugar pyrophosphatase	Peripheral inner membrane protein facing the cytoplasm	F1					n.def	n.def	n.def	n.def	n.def	n.def		n.def	n.def	n.def	n.def	n.def	n.def		0	0	0	0	0	12.9	0	0	0	0	0	0	0	0	0	0	5.3	0	0	0	0	0	0	1	0	0	0	0
EG12187	>EG12187 cpdA 3,5 cAMP phosphodiesterase	Cytoplasmic	A					n.def	n.def	1.02073	n.def	n.def	n.def		n.def	n.def	n.def	n.def	n.def	n.def		9.1	5.1	5.1	0	5.1	5.1	0	0	0	0	0	0	5.1	0	5.1	0	0	0	2	1	1	0	1	1	0	0	0	0
EG12188	>EG12188 ptsP PTS PEP-protein phosphotransferase Enzyme I (Ntr)	Peripheral inner membrane protein facing the cytoplasm	F1					n.def	n.def	n.def	n.def	n.def	n.def		n.def	n.def	n.def	n.def	n.def	n.def		0	3.6	0	0	0	0	0	1.7	0	0.9	0	0	0	1.5	0.9	0	0	0	0	2	0	0	0	0	0	1	0	1
EG12192	>EG12192 nadK ATP-NAD kinase	Peripheral inner membrane protein facing the cytoplasm	F1		Yes			n.def	n.def	FtsH only	FtsH only	n.def	n.def		n.def	n.def	n.def	n.def	n.def	n.def		4.8	4.8	27.7	18.8	9.6	20.9	24.7	4.8	24.7	4.8	4.8	0	0	4.8	0	10.6	0	0	1	1	5	3	2	3	4	1	4	1
EG12197	>EG12197 seqA Sequesters newly replicated hemimethylated oriC origins to prevent re-initiation	Peripheral inner membrane protein facing the cytoplasm	F1			Yes		1.1228	0.540165	0.973896	0.772656	3.95307	0.0165986		1.31869	0.684262	0.906011	0.879986	1.19475	0.794227		20.4	58.6	36.5	36.5	36.5	22.7	16.6	19.9	43.1	19.9	27.1	33.7	29.3	27.6	27.1	37	20.4	27.1	3	8	5	5	5	3	2	3	7	3
EG12200	>EG12200 yegD Putatitve DnaK-like chaperone, function unknown	Cytoplasmic	A					n.def	n.def	n.def	n.def	n.def	n.def		n.def	n.def	n.def	n.def	n.def	n.def		5.8	11.1	0	0	5.8	5.8	3.1	3.1	5.8	0	2.2	2.2	0	0	0	2.2	0	0	1	3	0	0	1	1	1	1	1	0
EG12202	>EG12202 treR Repressor of trehalose operon	Nucleoid	N					n.def	n.def	n.def	n.def	n.def	n.def		n.def	n.def	n.def	n.def	n.def	n.def		0	0	0	0	0	0	0	5.1	0	0	0	0	0	0	0	5.1	0	0	0	0	0	0	0	0	0	1	0	0
EG12204	>EG12204 cspC Multicopy suppressor of mukB	Nucleoid	N					1.0455	0.607155	0.805697	0.766665	1.30395	0.546355		0.704674	0.486835	1.03055	0.953189	0.726201	0.501038		56.5	78.3	42	42	56.5	42	56.5	78.3	17.4	63.8	78.3	78.3	24.6	78.3	42	56.5	63.8	56.5	3	4	2	2	3	2	3	4	1	3
EG12207	>EG12207 rlmA 23S rRNA m(1)G745 methyltransferase, SAM-dependent	Cytoplasmic	A	Yes	Yes			FtsH only	FtsH only	FtsH only	FtsH only	n.def	n.def		0.87845	0.379279	0.452799	0.274686	0.397761	0.238109		24.9	30.9	36.1	20.8	25.7	13.8	19.7	4.5	24.2	9.3	4.8	0	0	4.8	13.8	0	0	0	5	6	8	4	5	3	4	1	5	2
EG12211	>EG12211 panM PanD autocleavage accelerator, panothenate auxotrophy	Cytoplasmic	A					n.def	n.def	n.def	n.def	n.def	n.def		n.def	n.def	n.def	n.def	n.def	n.def		20.5	9.4	11	9.4	0	11	0	11	0	0	0	0	0	0	0	0	0	0	2	1	1	1	0	1	0	1	0	0
EG12218	>EG12218 dcrB Probable lipoprotein required for phage C1 adsorption	Inner Membrane Lipoprotein	E	Yes	Yes	Yes		3.47577	0.000453025	3.9861	0.0358682	6.81337	0.00260673		1.03546	0.830504	0.803175	0.151283	0.831658	0.264464		33	40.5	32.4	41.1	34.6	37.3	14.6	20.5	33	20.5	24.3	30.3	14.1	14.6	25.9	20.5	20.5	14.6	4	5	4	4	4	4	2	3	3	3
EG12224	>EG12224 yhiI Predicted membrane fusion protein (MFP) of efflux pump	Integral Inner Membrane	B					n.def	n.def	n.def	n.def	n.def	n.def		n.def	n.def	n.def	n.def	n.def	n.def		3.7	0	0	0	0	0	0	0	0	3.4	0	0	0	0	0	0	0	0	1	0	0	0	0	0	0	0	0	1
EG12229	>EG12229 yhiN Predicted oxidoreductase, function unknown	Integral Inner Membrane	B					n.def	n.def	n.def	n.def	n.def	n.def		n.def	n.def	n.def	n.def	n.def	n.def		3.2	0	0	3.2	0	0	3.2	3.2	0	0	0	0	0	0	0	0	0	0	1	0	0	1	0	0	1	1	0	0
EG12233	>EG12233 rsmJ 16S rRNA m(2)G1516 methyltransferase, SAM-dependent	Cytoplasmic	A					n.def	n.def	n.def	n.def	n.def	n.def		n.def	n.def	n.def	n.def	n.def	n.def		8	0	0	0	0	0	0	0	0	0	0	0	0	0	0	0	0	0	1	0	0	0	0	0	0	0	0	0
EG12234	>EG12234 rlmJ 23S rRNA m(6)A2030 methyltransferase, SAM-dependent	Cytoplasmic	A					2.31253	n.def	0.704537	n.def	0.492221	0.0971234		n.def	n.def	n.def	n.def	n.def	n.def		3.6	6.8	11.4	11.4	0	5.4	5.4	5.4	5.4	5.4	6.1	18.2	12.1	5.4	18.2	5.4	6.8	12.1	1	1	2	2	0	1	1	1	1	1
EG12247	>EG12247 yhjC Predicted transcriptional regulator, function unknown	Nucleoid	N					n.def	n.def	n.def	n.def	n.def	n.def		n.def	n.def	n.def	n.def	n.def	n.def		9	3	3	0	10.7	0	7.7	0	0	0	0	0	0	0	0	0	0	0	3	1	1	0	2	0	1	0	0	0
EG12253	>EG12253 kdgK Ketodeoxygluconokinase	Cytoplasmic	A					n.def	n.def	1.97788	n.def	n.def	n.def		n.def	n.def	n.def	n.def	n.def	n.def		0	0	0	4.9	0	0	4.9	4.9	4.9	15.9	11	0	11	6.1	11	0	0	6.1	0	0	0	1	0	0	1	1	1	3
EG12254	>EG12254 yhjJ Secreted protease homolog, function unknown	Periplasmic	G					1.10413	0.712692	0.0348897	n.def	0.223074	n.def		n.def	n.def	n.def	n.def	0.54802	0.15153		3.2	11.8	10.4	4.6	7.2	7.2	10.4	2.6	4	7.2	4.6	13.3	7.2	2.6	11.4	7.2	10.4	13.3	1	4	3	1	3	2	3	1	2	3
EG12271	>EG12271 yiaD Multicopy suppressor of bamD, function unknown	Integral Inner Membrane, Inner Membrane Lipoprotein	B,E					1.60973	0.378539	2.08526	0.204142	1.86372	0.0592597		1.01781	0.961664	0.799954	0.198342	0.814205	0.527184		26.5	25.6	26.5	16.4	16.4	30.6	16.4	16.4	26.5	16.4	16.4	16.4	8.7	16.4	16.4	26.5	16.4	16.4	3	3	3	2	2	4	2	2	3	2
EG12272	>EG12272 ghrB Glyoxylate/hydroxypyruvate reductase B	Cytoplasmic	A	Yes				FtsH only	FtsH only	1.06299	0.796255	0.849157	0.465955		0.773128	0.182825	0.803663	0.190087	0.621335	0.03561		13.9	21.9	16.7	16.4	13	10.5	16.7	16.7	13.9	4.6	13.3	10.8	13.9	16.4	13.3	16.7	13.9	16.4	3	6	4	4	4	3	4	4	3	1
EG12273	>EG12273 yiaF Probable lipoprotein, function unknown	Inner Membrane Lipoprotein	E	Yes	Yes	Yes		4.27538	0.00322233	4.55894	0.00240055	7.75701	0.00103269		0.785887	0.278842	0.901254	0.562655	0.708283	0.143759		22	26.3	24.2	24.6	28.8	13.6	28.8	25.8	28.8	28.4	24.2	28.8	28.8	23.7	23.7	19.5	28.8	23.7	5	5	5	4	5	3	5	5	5	5
EG12278	>EG12278 yiaJ Transcriptional repressor of yiaK-S operon involved with metabolism of an unknown carbohydrate	Nucleoid	N					n.def	n.def	n.def	n.def	n.def	n.def		n.def	n.def	n.def	n.def	n.def	n.def		0	0	0	0	0	0	0	0	0	0	0	5.3	0	0	0	3.9	0	0	0	0	0	0	0	0	0	0	0	0
EG12294	>EG12294 grxC Glutaredoxin 3	Peripheral inner membrane protein facing the cytoplasm	F1					0.642581	0.457245	1.69425	0.19224	1.48753	0.803543		1.41302	0.425958	0.415588	0.0109209	0.587236	0.0702861		27.7	27.7	27.7	27.7	27.7	18.1	27.7	27.7	27.7	37.3	27.7	27.7	27.7	27.7	27.7	27.7	27.7	27.7	2	2	2	2	2	1	2	2	2	3
EG12295	>EG12295 yibN Predicted rhodanese, function unknown	Integral Inner Membrane	B	Yes	Yes	Yes		3.64699	0.0263938	4.06354	0.0109854	4.55625	0.00355599		1.09324	0.667982	0.687404	0.063472	0.7515	0.224448		37.1	37.1	37.1	37.1	37.1	26.6	37.1	13.3	37.1	17.5	37.1	37.1	37.1	34.3	30.1	37.1	37.1	30.1	4	4	4	5	4	3	4	2	4	2
EG12296	>EG12296 gpmM Phosphoglycerate mutase, Mn-dependent, cofactor-independent	Cytoplasmic	A			Yes		0.398509	0.0778068	0.376264	0.453852	FtsH only	FtsH only		1.00185	0.997439	1.36739	0.638049	1.36992	0.320208		5.1	10.7	5.1	9.1	3.9	8.2	5.6	12.3	8.8	3.7	0	17.9	13	0	7.4	8.9	0	3.9	2	4	2	3	2	3	2	4	4	2
EG12298	>EG12298 yibQ Function unknown, DUF610 family	Periplasmic	G					n.def	n.def	n.def	n.def	n.def	n.def		n.def	n.def	n.def	n.def	n.def	n.def		5.3	0	0	0	0	0	0	0	0	0	0	0	0	0	0	0	0	0	1	0	0	0	0	0	0	0	0	0
EG12302	>EG12302 tmk Thymidylate kinase	Cytoplasmic	A					2.18169	n.def	n.def	n.def	n.def	n.def		n.def	n.def	n.def	n.def	n.def	n.def		5.6	8.9	0	25.4	0	0	0	5.6	0	9.9	0	0	5.6	9.9	0	5.6	0	0	1	1	0	3	0	0	0	1	0	2
EG12303	>EG12303 ycfH Predicted DNase, tatD paralog, no Tat phenotype	Cytoplasmic	A			Yes		3.34163	n.def	n.def	n.def	FtsH only	FtsH only		n.def	n.def	0.815992	0.483306	n.def	n.def		9.4	7.2	9.4	16.6	3	7.2	10.2	9.4	13.6	3	3	10.2	7.2	12.1	7.2	6.8	12.1	6.8	2	2	2	4	1	2	3	2	3	1
EG12306	>EG12306 yccF Inner membrane protein, DUF307 family, function unknown	Integral Inner Membrane	B					n.def	n.def	n.def	n.def	n.def	n.def		n.def	n.def	n.def	n.def	n.def	n.def		0	0	0	0	0	0	0	0	0	7.4	0	0	0	0	0	0	0	0	0	0	0	0	0	0	0	0	0	1
EG12310	>EG12310 pepB Peptidase B	Cytoplasmic	A					1.66348	n.def	5.4362	0.201607	0.396226	0.159165		n.def	n.def	0.625168	0.353604	n.def	n.def		12.2	31.1	28.6	30.2	29	26.5	35.1	19.7	37	16.2	14.8	25.8	36.3	26.9	32.8	20.1	27.4	23.4	3	8	8	8	7	7	9	6	9	5
EG12311	>EG12311 iscX Iron binding protein associated with IscS	Cytoplasmic	A					n.def	n.def	n.def	n.def	n.def	n.def		n.def	n.def	n.def	n.def	n.def	n.def		0	0	0	24.2	24.2	0	24.2	0	0	0	0	0	0	0	0	0	0	0	0	0	0	1	1	0	1	0	0	0
EG12313	>EG12313 zapD FtsZ stabilizer	Peripheral inner membrane protein facing the cytoplasm	F1	Yes		Yes		FtsH only	FtsH only	3.72551	n.def	FtsH only	FtsH only		1.57551	0.19117	0.653217	0.0523921	1.02915	0.903265		20.2	15.8	15.8	19.4	8.1	4.5	19.4	8.1	21.5	10.1	4.5	4.5	4.5	5.7	4.5	4.5	4.5	4.5	4	3	3	4	2	1	4	2	4	2
EG12316	>EG12316 acnB Aconitase B	Peripheral inner membrane protein facing the cytoplasm	F1	Yes	Yes	Yes		3.87951	0.0263713	2.33249	0.022174	3.28455	0.00311174		0.641397	0.353076	0.834631	0.58346	0.53533	0.0093487		36.9	42.8	44.6	47.7	41.2	32.3	42.9	36.2	39.1	29.1	35	34	37.5	32.5	44.3	39.1	37.5	39.4	27	31	32	33	30	22	30	24	29	21
EG12318	>EG12318 cueO Multicopper oxidase (laccase), confers copper tolerance	Periplasmic	G					0.271534	n.def	n.def	n.def	1.21063	n.def		n.def	n.def	n.def	n.def	n.def	n.def		0	2.1	2.1	0	0	0	2.1	2.1	0	0	2.1	5.4	2.1	2.1	0	7.4	0	5.2	0	1	1	0	0	0	1	1	0	0
EG12319	>EG12319 can Carbonic anhydrase, beta class	Cytoplasmic	A		Yes	Yes		2.77763	0.0759856	2.08608	0.0446786	3.29613	0.00142578		0.653551	0.428011	1.02457	0.954187	0.669609	0.00204777		42.7	24.1	24.1	24.1	24.1	16.8	24.1	23.2	24.1	23.2	24.1	24.1	24.1	23.2	24.1	23.2	24.1	24.1	6	5	5	5	5	3	5	4	5	4
EG12320	>EG12320 yadG ABC family transporter ATPase, function unknown	Peripheral inner membrane protein facing the cytoplasm	F1					n.def	n.def	2.27613	n.def	2.09973	n.def		n.def	n.def	n.def	n.def	n.def	n.def		11.4	4.2	0	0	4.2	0	3.2	3.2	7.1	0	5.5	0	7.1	0	5.5	7.1	0	5.5	2	1	0	0	1	0	1	1	1	0
EG12329	>EG12329 hrpB Predicted ATP-dependent helicase, function unknown	Cytoplasmic	A					n.def	n.def	n.def	n.def	n.def	n.def		n.def	n.def	n.def	n.def	n.def	n.def		1.5	0	0	0	3.1	1.2	0	0	0	0	0	0	0	0	0	0	0	0	1	0	0	0	2	1	0	0	0	0
EG12332	>EG12332 erpA Iron-sulfur cluster insertion protein	Peripheral inner membrane protein facing the cytoplasm	F1		Yes	Yes		2.02605	0.0688392	4.03531	0.00785521	2.71942	0.00431176		1.12339	0.715791	0.446356	0.0114032	0.501431	0.00614079		27.2	51.8	59.6	41.2	51.8	41.2	51.8	59.6	51.8	25.4	14.9	25.4	25.4	25.4	51.8	25.4	25.4	51.8	3	3	4	2	3	2	3	4	3	2
EG12336	>EG12336 yaeH Function unknown, UPF0325 family	Peripheral inner membrane protein facing the cytoplasm	F1					0.860242	0.714178	1.04	0.758683	0.460337	0.180128		0.98917	0.984155	0.397644	0.215996	0.393337	0.172806		34.4	26.6	26.6	15.6	17.2	17.2	7.8	17.2	17.2	17.2	17.2	7.8	7.8	17.2	18.8	34.4	17.2	9.4	3	3	3	2	2	2	1	2	2	2
EG12341	>EG12341 rseA Anti-RpoE sigma factor, spans inner membrane	Integral Inner Membrane	B					n.def	n.def	n.def	n.def	n.def	n.def		n.def	n.def	n.def	n.def	n.def	n.def		12	0	0	0	0	0	0	5.1	0	0	0	0	0	12	0	0	0	12	1	0	0	0	0	0	0	1	0	0
EG12343	>EG12343 yjjK Predicted ABC transporter, ATP-binding protein	Peripheral inner membrane protein facing the cytoplasm	F1	Yes	Yes	Yes		2.72881	0.00305479	2.93689	0.0221996	2.52849	0.00265869		1.22793	0.237334	0.813544	0.0488586	0.998978	0.993812		21.8	23.8	27	21.8	26.8	16.6	32.4	16.9	28.5	20.5	18.2	32.3	24.3	20.2	29.2	22.5	31.4	32.6	9	11	11	9	12	7	13	7	11	9
EG12345	>EG12345 ydfG Malonic semialdehyde reductase, NADPH-dependent	Cytoplasmic	A					0.876801	0.687061	2.36057	0.0580408	1.51437	0.417715		2.72134	0.0792913	0.386909	0.432904	1.05291	0.947151		10.1	19.8	7.3	21.4	18.1	3.6	18.1	6	19	16.1	13.3	21.4	27	19	27	24.2	21.4	21.4	2	4	1	3	3	1	3	1	4	3
EG12352	>EG12352 ppiC Peptidylprolyl-cis-trans isomerase C, rotamase	Cytoplasmic	A					n.def	n.def	n.def	n.def	n.def	n.def		n.def	n.def	n.def	n.def	n.def	n.def		0	10.8	10.8	21.5	10.8	0	21.5	10.8	21.5	10.8	0	10.8	0	0	0	10.8	10.8	10.8	0	1	1	2	1	0	2	1	2	1
EG12365	>EG12365 prkB Predicted phosphoribulokinase	Cytoplasmic	A					0.441901	n.def	0.287604	n.def	n.def	n.def		n.def	n.def	n.def	n.def	n.def	n.def		4.5	4.5	4.5	4.5	0	0	0	0	4.5	0	0	4.5	0	0	4.5	0	0	0	1	1	1	1	0	0	0	0	1	0
EG12366	>EG12366 rsmE 16S rRNA m(3)U1498 methyltransferase, SAM-dependent	Peripheral inner membrane protein facing the cytoplasm	F1					1.64823	0.173013	1.728	0.0667183	2.96664	n.def		1.39117	0.303507	n.def	n.def	n.def	n.def		10.3	5.8	10.3	10.3	5.8	12.3	10.3	0	10.3	10.3	10.3	10.3	10.3	11.9	10.3	10.3	10.3	10.3	2	1	2	2	1	2	2	0	2	2
EG12372	>EG12372 ygdG Ssb-binding protein, synthetic lethal with polA	Cytoplasmic	A					n.def	n.def	n.def	n.def	n.def	n.def		n.def	n.def	n.def	n.def	n.def	n.def		0	0	0	6	0	6	0	0	0	0	0	6	0	0	0	0	0	0	0	0	0	1	0	1	0	0	0	0
EG12373	>EG12373 ygdH Function unknown, UPF0717 family	Cytoplasmic	A					0.976321	0.756737	1.09307	0.547542	0.129961	0.0158017		1.01348	0.945284	0.660758	0.237358	0.669665	0.265381		11.7	8.4	5.9	5.9	8.4	11.7	9.3	8.4	5.9	5.9	2.6	8.4	11.7	13	13.9	10.8	11.7	11.7	4	3	2	2	3	4	3	3	2	2
EG12378	>EG12378 yecD Isochorismatase family protein, function unknown	Cytoplasmic	A					n.def	n.def	n.def	n.def	n.def	n.def		n.def	n.def	n.def	n.def	n.def	n.def		10.1	0	5.3	20.7	5.3	5.3	5.3	5.3	10.1	0	5.3	5.3	0	5.3	0	5.3	0	5.3	2	0	1	2	1	1	1	1	2	0
EG12380	>EG12380 gntT High-affinity gluconate transport	Integral Inner Membrane	B					1.60031	0.112751	1.44168	n.def	4.10391	4.75117e-05		n.def	n.def	n.def	n.def	1.7313	0.0246151		3.2	3.2	3.2	5.3	3.2	3.2	3.2	7.1	3.2	5	5	3.2	3.2	3.2	5.3	3.2	3.2	3.2	1	1	1	2	1	1	1	3	1	2
EG12394	>EG12394 msrB Methionine sulfoxide reductase B	Cytoplasmic	A					1.51038	n.def	1.70096	n.def	1.78016	n.def		n.def	n.def	n.def	n.def	n.def	n.def		0	16.1	16.1	16.1	16.1	16.1	16.1	0	16.1	24.8	16.1	16.1	16.1	16.1	16.1	16.1	16.1	0	0	1	1	1	1	1	1	0	1	2
EG12399	>EG12399 dhaM Multidomain dihydroxyacetone-specific PTS protein	Peripheral inner membrane protein facing the cytoplasm	F1					3.8004	0.0730395	9.01414	0.16243	13.6414	n.def		1.99552	0.029227	n.def	n.def	n.def	n.def		8.7	13.6	11.4	7.6	8.7	4.2	8.3	0	6.8	4.2	9.5	6.8	4.2	6.1	5.3	4.2	6.8	4.2	3	5	4	2	3	1	3	0	2	1
EG12401	>EG12401 rlmN 23S rRNA m(2)A2503, tRNA m(2)A37 methyltransferase, SAM-dependent	Cytoplasmic	A			Yes		1.94725	0.0502707	0.565661	0.232133	FtsH only	FtsH only		0.947068	0.847342	0.845565	0.5579	0.800808	0.3482		8.3	18.5	16.9	14.3	18.5	11.2	11.7	11.7	20.1	11.2	17.2	17.2	8.6	9.9	19.5	11.7	9.1	16.4	3	7	6	5	7	4	4	4	7	4
EG12404	>EG12404 ychN Predicted sulfur relay protein	Cytoplasmic	A					0.897949	n.def	n.def	n.def	3.51064	n.def		n.def	n.def	n.def	n.def	n.def	n.def		17.1	49.6	17.1	28.2	17.1	0	17.1	0	28.2	0	17.1	28.2	21.4	11.1	17.1	0	17.1	28.2	1	3	1	2	1	0	1	0	2	0
EG12409	>EG12409 aegA Predicted oxidoreductase, Fe-S subunit	Cytoplasmic	A					n.def	n.def	n.def	n.def	n.def	n.def		n.def	n.def	n.def	n.def	n.def	n.def		3.5	3.5	3.5	0	0	0	3.5	0	3.5	0	0	0	0	0	0	3.5	0	0	1	1	1	0	0	0	1	0	1	0
EG12410	>EG12410 nudK GDP-mannose pyrophosphatase	Cytoplasmic	A					n.def	n.def	n.def	n.def	n.def	n.def		n.def	n.def	n.def	n.def	n.def	n.def		7.3	0	7.3	0	0	7.3	0	0	0	7.3	0	0	0	0	0	0	0	7.3	1	0	1	0	0	1	0	0	0	1
EG12411	>EG12411 rfbD dTDP-L-rhamnose synthase	Cytoplasmic	A					n.def	n.def	n.def	n.def	n.def	n.def		n.def	n.def	n.def	n.def	n.def	n.def		4.7	4.7	4.7	0	0	0	0	10.7	8.4	0	4.7	0	7	4.7	0	4.7	11.7	0	1	1	1	0	0	0	0	2	2	0
EG12412	>EG12412 rfbB TDP-glucose oxidoreductase-4,6 dehydratase	Cytoplasmic	A					0.291635	0.0150914	0.388536	0.132144	0.453201	0.375925		1.89642	0.131338	0.79425	0.751062	1.50623	0.462948		8	16.6	15	20.2	18.8	15	23	15	10.5	15.5	11.6	18.8	19.4	11.4	23	15	23	19.1	2	4	4	5	5	4	6	4	3	4
EG12414	>EG12414 gatA Galactitol-specific PTS system EIIA component	Peripheral inner membrane protein facing the cytoplasm	F1	Yes	Yes	Yes		FtsH only	FtsH only	3.6052	0.000794543	FtsH only	FtsH only		0.698772	0.230399	0.597202	0.0240849	0.417308	0.00218747		20.7	53.3	24	56.7	22	22	27.3	22	30	8	0	12.7	22	22	12.7	12.7	12.7	12.7	2	5	3	5	2	2	3	2	3	1
EG12417	>EG12417 gatD Galactitol-1-phosphate dehydrogenase	Peripheral inner membrane protein facing the cytoplasm	F1	Yes				FtsH only	FtsH only	1.18346	0.444071	1.53206	0.0666275		0.935049	0.924067	0.810398	0.603179	0.757762	0.588265		9	22.3	13	8.1	9.2	9.8	12.4	16.2	9.5	3.2	3.2	2.9	12.4	6.1	2.9	12.7	6.1	2.9	3	6	3	3	3	2	4	4	3	1
EG12418;EG12763	>EG12418 gatZ Tagatose bisphosphate aldolase GatYZ subunit	Peripheral inner membrane protein facing the cytoplasm	F1	Yes		Yes		5.50335	0.00105958	1.88009	0.0245889	2.63446	0.00716652		0.520054	0.160154	0.724296	0.276623	0.376673	0.00621565		19.8	14.8	10.7	10.7	14.8	20.7	20.7	13.1	14.8	10.7	12.6	18.6	8.3	9	8.3	14.8	6.2	6.2	7	6	5	5	6	7	7	5	6	5
EG12424	>EG12424 prmC Release factor (RF1, RF2) glutamine methyltransferase	Cytoplasmic	A					n.def	n.def	n.def	n.def	n.def	n.def		n.def	n.def	n.def	n.def	n.def	n.def		0	0	0	0	0	0	0	0	0	0	0	0	0	0	4.7	4.7	0	0	0	0	0	0	0	0	0	0	0	0
EG12433	>EG12433 rluB 23S rRNA pseudouridine(2605) synthase	Peripheral inner membrane protein facing the cytoplasm	F1			Yes		1.23153	0.635597	1.9924	n.def	FtsH only	FtsH only		n.def	n.def	n.def	n.def	0.512615	0.291063		13.1	3.4	3.4	5.8	6.2	6.2	6.5	6.2	9.3	9.6	3.4	3.4	6.2	5.5	6.5	3.4	9.3	3.1	4	1	1	2	2	2	2	2	3	3
EG12434	>EG12434 ygiM SH3 domain protein, function unknown	Integral Inner Membrane	B					n.def	n.def	n.def	n.def	n.def	n.def		n.def	n.def	0.706574	0.0800582	n.def	n.def		14.6	4.9	0	15	9.2	4.4	23.3	20.4	4.9	0	0	0	0	0	0	0	0	0	3	1	0	3	2	1	4	4	1	0
EG12436	>EG12436 rseP Inner membrane zinc RIP metalloprotease	Integral Inner Membrane	B					n.def	n.def	n.def	n.def	n.def	n.def		n.def	n.def	n.def	n.def	n.def	n.def		4.2	0	0	0	0	0	0	0	0	0	0	0	0	0	0	0	0	0	1	0	0	0	0	0	0	0	0	0
EG12440	>EG12440 mpl UDP-N-acetylmuramate:L-alanyl-gamma-D-glutamyl-meso-diaminopimelate ligase	Cytoplasmic	A		Yes			4.23303	0.070457	FtsH only	FtsH only	3.48359	0.00198542		0.684755	0.366928	0.850301	0.626009	0.582248	0.0525158		13.1	18.4	10.1	15.3	17.1	12.9	16.8	10.3	21.2	14.7	6.1	9.2	4.2	1.8	1.8	5	4.2	11.2	4	6	4	4	5	4	5	4	7	5
EG12443	>EG12443 yggL Conserved protein, DUF469 family, function unknown	Peripheral inner membrane protein facing the cytoplasm	F1					0.911342	n.def	0.471311	0.103315	n.def	n.def		n.def	n.def	n.def	n.def	n.def	n.def		24.1	24.1	24.1	24.1	24.1	24.1	11.1	0	11.1	24.1	13	24.1	13	24.1	24.1	24.1	24.1	24.1	2	3	2	2	2	2	1	0	1	2
EG12447	>EG12447 speG Spermidine acetyltransferase	Cytoplasmic	A					0.530085	0.449287	1.3555	0.343675	1.05443	0.691295		2.66701	0.241249	0.688505	0.545528	1.83625	0.362009		13.4	13.4	21	21	21	21	28.5	13.4	21	21	21	13.4	21	13.4	21	21	21	21	2	2	3	3	3	3	4	2	3	3
EG12449	>EG12449 prmB 50S subunit L3 protein glutamine methyltransferase	Cytoplasmic	A	Yes				2.92299	0.000550799	1.8705	0.103334	3.50416	0.0666096		1.03022	0.871712	0.527867	0.0166236	0.543818	0.00836317		6.1	9	9	8.7	11.9	22.3	3.2	16.1	9	6.1	6.1	11	8.1	6.1	9	11.3	11.9	11.9	2	2	2	2	3	4	1	4	2	2
EG12453	>EG12453 rraB Protein inhibitor of RNase E		N, F1					n.def	n.def	n.def	n.def	n.def	n.def		n.def	n.def	n.def	n.def	n.def	n.def		10.1	34.1	10.1	34.1	10.1	10.1	10.1	34.1	10.1	10.1	10.1	10.1	0	34.1	34.1	10.1	10.1	10.1	1	2	1	2	1	1	1	2	1	2
EG12454	>EG12454 ybaK Cys-tRNAPro and Cys-tRNACys deacylase, tRNA editing	Cytoplasmic	A					n.def	n.def	1.44403	n.def	2.80814	n.def		n.def	n.def	n.def	n.def	n.def	n.def		17.6	6.3	6.3	6.3	8.2	14.5	8.2	6.3	14.5	7.5	6.9	0	14.5	7.5	25.2	0	13.8	15.7	2	1	1	1	1	2	1	1	2	1
EG12457	>EG12457 ydgA Required for swarming phenotype, DUF945 family	Peripheral inner membrane protein facing the periplasm	F2	Yes		Yes		4.40399	0.00284608	3.03826	0.205453	4.53985	4.35088e-05		0.629119	0.0855351	0.695361	0.078758	0.437465	0.00738658		15.9	26.5	24.3	15.3	25.5	27.1	16.9	18.5	28.3	17.7	14.1	27.9	12.9	13.1	12.9	22.9	13.1	20.9	6	9	8	5	9	9	6	7	10	7
EG12473	>EG12473 epmB Required for lysylation of EF-P Lys34	Cytoplasmic	A					0.458353	n.def	n.def	n.def	n.def	n.def		n.def	n.def	n.def	n.def	n.def	n.def		0	0	3.8	0	0	0	0	0	0	0	0	2.3	0	0	2.3	0	0	0	0	0	1	0	0	0	0	0	0	0
EG12478	>EG12478 mscM Mechanosensitive channel protein, miniconductance	Integral Inner Membrane	B					n.def	n.def	26.3159	n.def	n.def	n.def		n.def	n.def	n.def	n.def	n.def	n.def		0	0	0	0	0	0.6	0	0.6	0	0	0	0	0	1.4	0	0	0	0	0	0	0	0	0	1	0	1	0	0
EG12479	>EG12479 rsgA Ribosome-stimulated GTPase, 30S subunit assemby	Peripheral inner membrane protein facing the cytoplasm	F1					n.def	n.def	n.def	n.def	n.def	n.def		n.def	n.def	n.def	n.def	n.def	n.def		3.4	3.4	0	0	0	3.4	3.4	0	3.4	0	0	2.6	0	0	0	0	0	0	1	1	0	0	0	1	1	0	1	0
EG12480	>EG12480 orn 3 to 5 oligoribonuclease	Peripheral inner membrane protein facing the cytoplasm	F1					n.def	n.def	n.def	n.def	n.def	n.def		n.def	n.def	n.def	n.def	n.def	n.def		6.1	6.1	0	5.5	0	6.1	0	6.1	0	0	4.4	5.5	0	0	0	0	0	0	1	1	0	1	0	1	0	1	0	0
EG12483	>EG12483 rlmB 23S rRNA mG2251 2-O-ribose methyltransferase, SAM-dependent	Cytoplasmic	A					1.64184	n.def	0.945347	n.def	0.964552	0.808926		n.def	n.def	n.def	n.def	n.def	n.def		14	4.9	8.2	13.6	5.8	5.3	16	10.3	8.6	16	18.1	10.7	10.7	4.9	4.9	10.7	10.7	8.2	3	1	2	3	1	1	3	2	2	3
EG12503	>EG12503 fklB FKBP-type peptidyl-prolyl cis-trans isomerase	Cytoplasmic	A	Yes	Yes	Yes		2.39898	0.0315925	2.94129	0.000466879	3.11866	0.00117705		0.723997	0.00192394	0.588165	0.00300994	0.42583	0.00071858		31.1	36.4	24.3	30.6	30.6	23.8	30.6	23.8	24.3	23.8	30.1	30.6	35.4	35.4	35.4	25.2	35.4	30.1	5	6	4	5	5	4	5	4	4	4
EG12504	>EG12504 cycA D-alanine, beta-alanine, D-serine, glycine permease	Integral Inner Membrane	B					n.def	n.def	n.def	n.def	n.def	n.def		n.def	n.def	n.def	n.def	n.def	n.def		3.2	3	3	3	3	3	3	0	3	3	3.2	3	3	3	0	5.7	3	0	2	1	1	1	1	1	1	0	1	1
EG12512	>EG12512 ytfL Inner membrane protein, UPF0053 family, function unknown	Integral Inner Membrane	B					n.def	n.def	n.def	n.def	n.def	n.def		n.def	n.def	n.def	n.def	n.def	n.def		0	5.1	4.3	9.4	4.3	0	4.3	2.7	6.9	0	0	0	0	0	0	0	0	0	0	1	1	2	1	0	1	1	2	0
EG12516	>EG12516 ytfP Gamma-glutamyl cyclotransferase (GGCT) domain protein, function unknown	Cytoplasmic	A					1.38844	n.def	0.847061	0.594622	3.30133	n.def		0.345167	0.190765	n.def	n.def	n.def	n.def		22.1	22.1	11.5	11.5	11.5	11.5	11.5	11.5	0	11.5	11.5	11.5	11.5	11.5	11.5	11.5	11.5	11.5	2	2	1	1	1	1	1	1	0	1
EG12524	>EG12524 ridA Enamine/imine deaminase, reaction intermediate detoxification	Peripheral inner membrane protein facing the cytoplasm	F1					0.704111	0.754639	1.60051	0.596878	4.03868	0.156782		0.880812	0.842107	2.17681	0.30022	1.91736	0.368125		44.5	30.5	57.8	57.8	64.8	57.8	30.5	57.8	37.5	10.2	65.6	57.8	64.8	57.8	57.8	37.5	57.8	64.8	3	2	3	3	4	3	2	3	3	1
EG12525	>EG12525 mgtA Magnesium transporter, ATP-dependent	Integral Inner Membrane	B					3.46067	n.def	0.423132	n.def	1.13286	n.def		n.def	n.def	n.def	n.def	n.def	n.def		0	2.8	4.9	1.9	0	2.2	1.1	1.9	3	0	3.1	1.2	1.2	2.8	2.8	2.6	1.9	1.9	0	1	3	1	0	2	1	1	2	0
EG12532	>EG12532 yjgM Predicted acetyltransferase	Cytoplasmic	A					n.def	n.def	n.def	n.def	n.def	n.def		n.def	n.def	n.def	n.def	n.def	n.def		0	0	0	0	0	0	6.6	7.2	7.2	0	0	7.2	0	0	0	0	0	0	0	0	0	0	0	0	1	1	1	0
EG12536	>EG12536 lptG Lipopolysaccharide export ABC permease	Integral Inner Membrane	B					n.def	n.def	n.def	n.def	n.def	n.def		n.def	n.def	n.def	n.def	n.def	n.def		9.4	3.6	3.6	0	5.8	13.1	0	0	5.8	3.6	0	0	0	0	0	0	0	0	2	1	1	0	1	3	0	0	1	1
EG12561	>EG12561 nanS 9-O-acetyl N-acetylneuraminic acid deacetylase	Cytoplasmic	A					n.def	n.def	n.def	n.def	n.def	n.def		n.def	n.def	n.def	n.def	n.def	n.def		0	0	0	4.9	0	0	0	0	0	0	0	0	0	0	0	0	0	0	0	0	0	1	0	0	0	0	0	0
EG12567	>EG12567 iadA Isoaspartyl dipeptidase	Cytoplasmic	A	Yes				FtsH only	FtsH only	0.399409	n.def	0.596995	0.835105		n.def	n.def	n.def	n.def	0.600692	0.618366		7.7	7.7	13.6	0	7.7	11	14.1	7.4	7.7	2.1	13.6	2.6	13.6	2.6	13.6	13.6	7.7	13.6	2	2	3	0	2	2	3	2	2	1
EG12586	>EG12586 yjiY Predicted transporter, function unknown	Integral Inner Membrane	B					0.478192	0.579176	n.def	n.def	2.01677	n.def		n.def	n.def	n.def	n.def	2.63434	0.335084		2.5	3.9	2.5	2.2	2.5	2.5	2.5	2.5	2.5	2.5	2.5	2.5	0	0	0	2.5	2.2	2.5	1	2	1	1	1	1	1	1	1	1
EG12591	>EG12591 opgB Phosphoglycerol transferases I and II, OPG biolsynthesis	Integral Inner Membrane	B					0.980352	n.def	1.44761	n.def	0.0548031	n.def		n.def	n.def	n.def	n.def	n.def	n.def		0	3	4.6	1.8	3	0	0	1.2	2.1	3.9	0	0	1.8	1.8	0	1.8	1.8	0	0	2	2	1	2	0	0	1	1	2
EG12596	>EG12596 rsmC 16S rRNA m(2)G1207 methyltransferase, SAM-dependent	Peripheral inner membrane protein facing the cytoplasm	F1					n.def	n.def	0.719789	n.def	n.def	n.def		n.def	n.def	n.def	n.def	n.def	n.def		14	15.7	3.5	22.2	6.4	10.5	0	0	0	0	9.9	3.5	8.2	8.2	15.7	11.7	0	4.1	3	3	1	4	1	2	0	0	0	0
EG12604	>EG12604 yjhU Predicted transcriptional regulator, function unknown	Cytoplasmic	A					n.def	n.def	n.def	n.def	n.def	n.def		n.def	n.def	n.def	n.def	n.def	n.def		0	0	0	0	0	0	0	0	3	0	0	0	0	2.4	0	0	0	0	0	0	0	0	0	0	0	0	1	0
EG12606	>EG12606 fabF beta-Ketoacyl-ACP synthase II	Peripheral inner membrane protein facing the cytoplasm	F1					5.21155	0.578174	0.267679	0.0489684	0.466921	0.346972		1.02646	0.938458	0.512503	0.301377	0.526062	0.342494		34.9	45.8	37.8	37.5	43.3	18.9	39	18.9	33.2	13.1	29.5	28.8	32.2	31	32.4	31	32.4	32.2	9	11	10	8	11	4	8	4	8	3
EG12612	>EG12612 degQ Periplasmic serine endoprotease	Periplasmic	G					n.def	n.def	0.859939	n.def	0.327874	n.def		n.def	n.def	n.def	n.def	n.def	n.def		14.9	12.7	10.5	6.2	10.5	17.6	9.5	4.4	13.8	2	4.4	0	9.5	2	9.5	0	8.1	9.5	3	3	2	1	2	4	2	1	3	1
EG12613	>EG12613 gstA Glutathione S-transferase	Cytoplasmic	A					2.85265	n.def	n.def	n.def	2.75844	n.def		n.def	n.def	n.def	n.def	1.37506	0.514944		5.5	5.5	5.5	0	5.5	5.5	12.9	5.5	5.5	5.5	5.5	5.5	5.5	5.5	5.5	13.9	5.5	5.5	1	1	1	0	1	1	2	1	1	1
EG12614	>EG12614 yhcB Complexed with cytochrome bd oxidase, function unknown	Integral Inner Membrane	B	Yes	Yes	Yes		2.88406	0.00808281	3.97622	0.0285112	FtsH only	FtsH only		1.0233	0.878502	0.741426	0.199338	0.758701	0.249158		52.3	52.3	52.3	52.3	35.6	35.6	64.4	43.9	52.3	31.1	34.1	31.1	31.1	43.9	35.6	43.9	35.6	22.7	5	5	5	5	3	3	6	4	5	3
EG12618	>EG12618 lptA Periplasmic LPS-binding protein, binds Lipid A domain	Periplasmic	G					n.def	n.def	n.def	n.def	n.def	n.def		n.def	n.def	n.def	n.def	n.def	n.def		0	0	0	0	0	0	0	0	0	6.5	0	0	0	0	0	0	0	0	0	0	0	0	0	0	0	0	0	1
EG12622	>EG12622 adhP Ethanol-active dehydrogenase/acetaldehyde-active reductase	Peripheral inner membrane protein facing the cytoplasm	F1		Yes			1.29215	0.760988	FtsH only	FtsH only	n.def	n.def		n.def	n.def	n.def	n.def	n.def	n.def		18.2	39.3	26.2	8.9	16.4	27.4	21.4	7.4	21.4	22	18.2	21.4	8.3	4.2	4.2	10.1	4.2	4.2	4	8	6	2	4	6	5	2	5	5
EG12623	>EG12623 ybaL Potassium transporter homolog, function unknown	Integral Inner Membrane	B					n.def	n.def	n.def	n.def	n.def	n.def		n.def	n.def	n.def	n.def	n.def	n.def		0	0	0	0	0	0	0	0	0	0	2.7	0	2.7	1.6	2.7	0	2.7	2.7	0	0	0	0	0	0	0	0	0	0
EG12627	>EG12627 dppD Dipeptide/heme transport, ATP-binding protein	Peripheral inner membrane protein facing the cytoplasm	F1					0.45801	n.def	2.1928	n.def	1.38621	n.def		n.def	n.def	n.def	n.def	n.def	n.def		4.9	4.9	4.9	0	0	4.9	4.9	8.3	0	0	4.9	8.3	8.9	0	4.9	4.9	4.9	4.9	1	1	1	0	0	1	1	2	0	0
EG12628	>EG12628 dppF Dipeptide/heme transport, ATP-binding protein	Peripheral inner membrane protein facing the cytoplasm	F1					n.def	n.def	n.def	n.def	n.def	n.def		n.def	n.def	n.def	n.def	n.def	n.def		5.1	0	0	0	0	0	0	0	0	0	0	0	0	0	0	0	0	0	1	0	0	0	0	0	0	0	0	0
EG12629	>EG12629 gntK Gluconokinase, thermoresistant	Cytoplasmic	A					1.54728	0.283715	1.54671	0.104747	3.37918	0.0688164		1.00798	0.970445	1.07736	0.710521	1.08596	0.771646		12	12	5.1	23.4	5.1	5.1	23.4	6.9	12	12	12	12	12	12	12	12	12	5.1	2	2	1	3	1	1	3	1	2	2
EG12630	>EG12630 gntR Controls gntKU induction, also edd and eda	Cytoplasmic	A					n.def	n.def	n.def	n.def	n.def	n.def		n.def	n.def	n.def	n.def	n.def	n.def		0	0	0	0	0	2.4	5.7	0	0	0	0	2.4	0	2.4	0	2.4	8.2	0	0	0	0	0	0	1	1	0	0	0
EG12637	>EG12637 rnk Regulator of nucleoside diphosphate kinase	Cytoplasmic	A					0.628152	n.def	0.42915	0.173842	1.87412	0.0832562		0.455862	0.270862	2.87256	0.193859	1.30949	0.339966		16.2	41.2	16.2	34.6	16.2	16.2	34.6	16.2	16.2	0	16.2	16.2	34.6	16.2	16.2	16.2	34.6	16.2	1	2	1	2	1	1	2	1	1	0
EG12642	>EG12642 pdxK B6-vitamer kinase	Cytoplasmic	A					0.137239	n.def	0.485167	n.def	n.def	n.def		n.def	n.def	n.def	n.def	n.def	n.def		3.2	3.2	3.2	0	0	8.1	0	3.2	3.2	3.2	0	4.9	0	4.9	3.2	4.9	0	6.4	1	1	1	0	0	2	0	1	1	1
EG12656	>EG12656 mdaB FMN-dependent NADH-quinone reductase	Cytoplasmic	A					n.def	n.def	n.def	n.def	n.def	n.def		n.def	n.def	n.def	n.def	n.def	n.def		21.2	0	0	0	0	0	10.4	0	0	0	0	0	19.7	0	0	0	0	10.4	2	0	0	0	0	0	1	0	0	0
EG12657	>EG12657 ygiN Quinol monooxygenase	Cytoplasmic	A					n.def	n.def	1.68552	n.def	0.214587	n.def		n.def	n.def	n.def	n.def	n.def	n.def		8.7	17.3	8.7	8.7	17.3	17.3	8.7	8.7	17.3	8.7	8.7	8.7	17.3	8.7	0	0	8.7	17.3	1	2	1	1	2	2	1	1	2	1
EG12668	>EG12668 uidC Enhances UidB-mediated glucuronide transport	Outer Membrane b-barrel protein	H					0.318893	n.def	n.def	n.def	n.def	n.def		n.def	n.def	n.def	n.def	n.def	n.def		5	0	2.4	0	2.4	2.4	2.4	2.4	0	2.6	2.6	2.6	0	2.4	0	0	2.4	0	2	0	1	0	1	1	1	1	0	1
EG12669	>EG12669 solA N-methyltryptophan oxidase, FAD-containing	Peripheral inner membrane protein facing the cytoplasm	F1	Yes				3.22644	0.000308155	0.601334	0.26977	1.09796	0.760116		0.637483	0.262241	0.682765	0.348343	0.435251	0.0783315		17.5	15.1	21.8	21.8	16.9	21.8	20.2	8.1	12.4	8.1	16.9	15.3	15.3	12.9	21.8	21.2	12.9	12.9	5	4	5	5	4	5	5	2	3	2
EG12670	>EG12670 dinI Stabilizes RecA filaments	Cytoplasmic	A					n.def	n.def	0.387898	n.def	0.907733	n.def		n.def	n.def	n.def	n.def	n.def	n.def		40.7	0	22.2	0	22.2	22.2	0	0	22.2	0	0	0	22.2	0	0	22.2	22.2	22.2	2	0	1	0	1	1	0	0	1	0
EG12672	>EG12672 tpx Lipid hydroperoxide peroxidase	Peripheral inner membrane protein facing the cytoplasm	F1					1.51683	0.226521	0.518185	0.0608251	0.520159	0.101334		0.760694	0.281974	0.661804	0.379346	0.50343	0.195432		37.5	38.1	37.5	37.5	37.5	37.5	37.5	32.1	37.5	37.5	38.1	29.8	24.4	29.8	37.5	29.8	29.8	29.8	4	5	4	4	4	4	4	3	4	4
EG12674	>EG12674 uspF Stress-induced protein, binds ATP	Cytoplasmic	A					2.56205	n.def	n.def	n.def	n.def	n.def		n.def	n.def	n.def	n.def	n.def	n.def		11.1	11.1	0	0	11.1	0	0	0	0	14.6	0	0	0	0	0	0	0	0	1	1	0	0	1	0	0	0	0	2
EG12676	>EG12676 bamA Outer membrane protein required for OM biogenesis	Outer Membrane b-barrel protein	H	Yes				2.64598	0.00408048	2.36383	0.250354	1.06105	0.650727		0.731532	0.348655	0.776718	0.272499	0.568195	0.0100662		4.2	10.7	10.4	5.2	8.3	11	12.1	7.8	11.4	5.7	9.1	12.1	8	5.3	7	7.5	9.5	3.3	2	6	6	3	5	6	7	6	6	3
EG12677	>EG12677 iscS Cysteine desulfurase, PLP-dependent	Peripheral inner membrane protein facing the cytoplasm	F1	Yes				4.17958	0.0351806	4.4826	0.105155	5.49892	0.0705536		0.46384	0.272792	1.06846	0.886964	0.495596	0.000257041		49.3	48	47	43.6	50.5	41.6	47.8	38.6	48	37.6	42.1	44.1	48	50.5	54	45.5	43.3	47.5	16	16	17	15	16	13	16	12	16	12
EG12678	>EG12678 znuA Zinc periplasmic binding protein, ABC transporter	Periplasmic	G		Yes			2.11523	0.399787	2.73746	0.0169822	1.10575	0.629591		0.668436	0.138409	0.496109	0.215085	0.331617	0.115303		27.7	36.1	35.5	38.1	27.7	11.9	35.5	11.9	35.5	14.8	27.1	37.1	20.6	27.4	27.7	27.7	37.1	27.7	6	6	6	7	6	3	7	3	7	4
EG12679	>EG12679 yeaD Function unknown, mutarotase homolog, low abundance protein	Cytoplasmic	A					0.0401822	n.def	0.0662199	n.def	0.0915571	n.def		0.697189	0.549607	n.def	n.def	n.def	n.def		5.4	5.4	5.4	9.2	5.4	9.2	9.2	5.4	9.2	0	0	9.2	9.2	0	7.8	9.2	9.2	9.2	1	1	1	2	1	2	2	1	2	0
EG12683	>EG12683 uspG Stress protein, induced in stationary phase	Peripheral inner membrane protein facing the cytoplasm	F1		Yes	Yes		1.1355	0.410086	6.23598	0.00482154	3.35442	0.00515971		6.41169	0.298976	0.560823	0.129912	3.59582	0.366455		66.9	59.9	33.8	67.6	66.9	64.1	64.1	38.7	66.9	9.9	22.5	18.3	45.1	19	21.8	56.3	45.1	36.6	7	6	3	8	7	7	7	5	7	1
EG12684	>EG12684 lolA Periplasmic protein responsible for sorting and transporting lipoproteins to outer membrane	Periplasmic	G					2.41216	n.def	n.def	n.def	0.747148	n.def		n.def	n.def	n.def	n.def	n.def	n.def		7.9	7.9	7.9	5.9	0	7.4	0	13.3	0	7.4	6.4	7.9	20.7	7.9	13.3	13.3	13.3	7.9	1	1	1	1	0	1	0	2	0	1
EG12685	>EG12685 ygfZ Iron-sulfur cluster repair protein	Cytoplasmic, Periplasmic	A,G					1.19472	0.530989	1.42728	0.344975	1.28467	0.410885		1.19049	0.450008	0.477141	0.108218	0.568032	0.143046		25.2	20.9	26.7	32.5	16.9	18.7	26.1	18.4	18.1	20.6	30.7	20.2	34.4	12.6	35	20.2	23.6	25.2	6	6	7	7	4	4	6	5	5	6
EG12688	>EG12688 grxB Glutaredoxin 2	Cytoplasmic	A					0.302112	0.0327152	0.490722	n.def	1.11538	n.def		n.def	n.def	n.def	n.def	n.def	n.def		22.3	16.7	11.2	15.3	11.2	0	20	4.7	8.8	4.2	4.2	8.8	4.7	4.7	11.2	4.2	17.7	0	3	2	1	2	1	0	2	1	1	1
EG12692	>EG12692 ybdH Required for swarming phenotype, function unknown	Cytoplasmic	A					n.def	n.def	2.38223	n.def	n.def	n.def		n.def	n.def	n.def	n.def	0.961705	0.903504		3	8.3	3	0	3	5.8	3	3	3	0	0	0	0	2.8	0	0	0	0	1	2	1	0	1	2	1	1	1	0
EG12695	>EG12695 azoR NADH-azoreductase, FMN-dependent	Peripheral inner membrane protein facing the cytoplasm	F1					n.def	n.def	n.def	n.def	n.def	n.def		n.def	n.def	n.def	n.def	n.def	n.def		6.5	0	0	0	0	0	0	0	0	0	0	0	0	0	0	0	0	0	1	0	0	0	0	0	0	0	0	0
EG12698	>EG12698 pncC NMN amidohydrolase	Cytoplasmic	A					n.def	n.def	1.04034	n.def	n.def	n.def		n.def	n.def	n.def	n.def	n.def	n.def		10.9	0	0	0	6.1	0	0	0	0	0	6.1	6.1	0	6.1	6.1	6.1	0	0	1	0	0	0	1	0	0	0	0	0
EG12700	>EG12700 gltI Glutamate, aspartate binding protein, periplasmic	Periplasmic	G					0.984462	n.def	0.578906	n.def	1.03404	0.627455		n.def	n.def	n.def	n.def	n.def	n.def		23.2	14.6	20.2	25.8	9.9	21.2	28.5	29.5	22.8	12.9	25.2	31.1	24.5	15.6	22.2	29.5	20.2	14.6	5	3	4	5	2	4	6	6	5	3
EG12701	>EG12701 rihA Ribonucleoside hydrolase, pyrimidine specific	Cytoplasmic	A					n.def	n.def	n.def	n.def	n.def	n.def		n.def	n.def	n.def	n.def	n.def	n.def		0	0	0	0	0	0	0	0	0	3.2	0	0	0	0	0	0	0	0	0	0	0	0	0	0	0	0	0	1
EG12705	>EG12705 yggN Predicted periplasmic protein, function unknown	Periplasmic	G					n.def	n.def	n.def	n.def	n.def	n.def		n.def	n.def	n.def	n.def	n.def	n.def		0	0	0	5.4	0	0	0	0	0	0	5.4	5.4	0	5.4	5.4	5.4	0	0	0	0	0	1	0	0	0	0	0	0
EG12712	>EG12712 luxS S-ribosylhomocysteine lyase, autoinducer 2 (AI-2) synthesis	Peripheral inner membrane protein facing the cytoplasm	F1		Yes	Yes		1.83297	0.037378	2.2075	0.0193133	2.6875	0.00443295		1.097	0.520556	0.645048	0.0245384	0.70762	0.0262503		31.6	40.9	31.6	36.3	36.3	31.6	36.3	31.6	36.3	31.6	36.3	31.6	36.3	36.3	36.3	31.6	36.3	31.6	4	6	4	5	5	4	5	4	5	4
EG12717	>EG12717 mug Uracil DNA glycosylase, G:U mismatch-specific, dsDNA-specific	Nucleoid	N					0.750402	n.def	0.637716	n.def	0.266167	n.def		n.def	n.def	n.def	n.def	n.def	n.def		20.8	0	0	6	0	14.9	8.3	6.5	8.3	0	6	6	6	0	6.5	0	14.3	8.3	3	0	0	1	0	2	1	1	1	0
EG12726	>EG12726 rlmG 23S rRNA m(2)G1835 methyltransferase, SAM-dependent	Cytoplasmic	A					n.def	n.def	n.def	n.def	n.def	n.def		n.def	n.def	n.def	n.def	n.def	n.def		4.8	4.8	0	0	0	0	0	0	4.8	4.8	4.8	0	0	0	0	0	0	0	1	1	0	0	0	0	0	0	1	1
EG12743	>EG12743 yqjD Membrane-anchored ribosome-binding protein, function unknown	Integral Inner Membrane, ribosomal	B,r					6.45719	n.def	2.01873	n.def	1.99403	n.def		1.2305	0.500905	0.634957	0.0119042	0.781312	0.349663		15.8	15.8	15.8	15.8	15.8	15.8	15.8	15.8	15.8	0	15.8	15.8	15.8	0	15.8	15.8	0	15.8	1	1	1	1	1	1	1	1	1	0
EG12749	>EG12749 yhaJ LysR-family transcriptional regulator, function unknown	Nucleoid	N					n.def	n.def	n.def	n.def	n.def	n.def		n.def	n.def	n.def	n.def	n.def	n.def		0	0	0	0	0	0	0	0	3.7	0	3.4	0	3.7	3.7	0	0	0	0	0	0	0	0	0	0	0	0	1	0
EG12757	>EG12757 tdcF Putative reactive intermediate deaminase, UPF0076 family	Cytoplasmic	A					n.def	n.def	n.def	n.def	n.def	n.def		n.def	n.def	n.def	n.def	n.def	n.def		7	7	7	7	7	7	7	7	7	7	7	7	7	7	0	7	7	0	1	1	1	1	1	1	1	1	1	1
EG12762	>EG12762 agaR aga regulon transcriptional repressor	Nucleoid	N					0.384815	n.def	n.def	n.def	n.def	n.def		n.def	n.def	n.def	n.def	n.def	n.def		5.2	0	0	0	0	0	0	0	0	0	0	5.2	0	0	0	0	0	5.2	1	0	0	0	0	0	0	0	0	0
EG12777	>EG12777 rsmI 16S rRNA C1402 2-O-ribose methyltransferase, SAM-dependent	Cytoplasmic	A	Yes	Yes	Yes		3.74456	0.0361884	4.74877	0.00275903	2.30167	0.0112264		0.681355	0.0551511	0.498199	0.0401287	0.33945	0.0167895		18.5	38.5	23.8	38.1	23.8	22.4	29.7	8.4	9.8	8.4	12.9	32.5	23.8	8.4	18.2	18.5	14	28	4	7	4	7	4	4	5	2	2	2
EG12778	>EG12778 lpoA OM lipoprotein stimulator of MrcA transpeptidase	Outer Membrane Lipoprotein	I					n.def	n.def	n.def	n.def	0.143322	n.def		n.def	n.def	n.def	n.def	n.def	n.def		5.2	2.4	0	0	0	0	0	2.8	2.8	0	0	1.5	2.8	2.8	0	0	2.9	0	2	1	0	0	0	0	0	1	1	0
EG12780	>EG12780 diaA DnaA-binding protein	Cytoplasmic	A					n.def	n.def	n.def	n.def	n.def	n.def		n.def	n.def	n.def	n.def	n.def	n.def		7.1	13.8	0	13.8	20.9	13.8	27.6	0	13.8	0	0	13.8	13.8	0	0	0	0	13.8	1	1	0	1	2	1	2	0	1	0
EG12781	>EG12781 yraP OM lipoprotein, function unknown, mutant is SDS-sensitive	Outer Membrane Lipoprotein	I					0.622761	n.def	3.48617	0.312628	0.562229	0.238016		n.def	n.def	0.441351	0.204785	n.def	n.def		20.4	0	15.2	7.3	7.3	15.2	15.2	15.2	15.2	7.3	15.2	20.4	15.2	15.2	7.9	15.2	15.2	15.2	3	0	2	1	1	2	2	2	2	1
EG12788	>EG12788 yhbS Predicted acetyltransferase	Cytoplasmic	A					n.def	n.def	4.41648	n.def	2.4352	n.def		1.43058	0.15456	0.580121	0.0796075	0.829909	0.384678		9	9	9	9	9	9	9	9	9	0	9	9	9	9	9	9	9	9	1	1	1	1	1	1	1	1	1	0
EG12792	>EG12792 yhbW Function unknown, luciferase-like	Cytoplasmic	A	Yes	Yes	Yes		FtsH only	FtsH only	2.84504	0.0187656	3.16992	0.0304476		0.609768	0.21477	0.597138	0.147273	0.364115	0.0229444		17.9	26.9	8.1	9.3	11.3	11	24.5	7.8	11.3	3.6	2.1	9	11	5.4	9	11	11.3	5.7	6	8	3	2	3	3	6	2	3	1
EG12794	>EG12794 yhbY RNA binding protein, associated with pre-50S ribosomal subunits	Cytoplasmic	A					n.def	n.def	n.def	n.def	n.def	n.def		n.def	n.def	n.def	n.def	n.def	n.def		18.6	18.6	18.6	18.6	18.6	18.6	18.6	18.6	18.6	9.3	9.3	18.6	18.6	18.6	18.6	18.6	18.6	18.6	2	2	2	2	2	2	2	2	2	1
EG12795	>EG12795 obgE DNA-binding GTPase involved in cell partioning and DNA repair	Peripheral inner membrane protein facing the cytoplasm	F1					2.7878	0.305099	1.85916	n.def	6.85562	n.def		0.749312	0.234837	n.def	n.def	n.def	n.def		10.3	5.9	11.3	5.4	5.9	5.9	11.3	5.9	5.9	2.1	5.4	9.2	0	0	5.4	9.7	15.6	10.3	2	1	2	1	1	1	2	1	1	1
EG12796	>EG12796 ibaG Acid stress protein	Cytoplasmic	A					1.85267	0.121239	2.01403	0.218014	2.45246	n.def		0.836541	0.681274	0.699679	0.424038	0.58531	0.288362		31	38.1	38.1	39.3	38.1	28.6	28.6	27.4	27.4	27.4	27.4	27.4	27.4	27.4	0	27.4	0	19	3	3	3	4	3	3	3	2	2	2
EG12797	>EG12797 mlaB Probable phospholipid ABC transporter, quinolone resistance	Peripheral inner membrane protein facing the cytoplasm	F1					n.def	n.def	n.def	n.def	n.def	n.def		n.def	n.def	n.def	n.def	n.def	n.def		0	11.3	0	0	0	0	0	11.3	11.3	0	0	0	0	0	0	0	0	0	0	1	0	0	0	0	0	1	1	0
EG12798	>EG12798 mlaC Putative phospholipid-binding protein, periplasmic	Periplasmic	G					0.336102	0.146672	0.413122	0.0167342	0.51853	0.189391		1.56085	0.364619	0.748989	0.412506	1.16906	0.742951		23.2	35.5	23.2	39.3	27.5	27.5	43.6	23.2	27.5	33.6	21.3	33.6	17.1	17.1	37.4	17.1	17.1	23.2	4	5	4	6	5	4	7	4	5	5
EG12799	>EG12799 mlaD Putative phospholipid-binding protein, signal-anchored	Periplasmic	G	Yes	Yes	Yes		3.27837	0.0118969	4.63885	0.00797185	9.01125	8.79015e-05		1.19397	0.490139	0.727622	0.102657	0.868762	0.548907		38.3	48.1	37.2	29.5	48.1	27.3	41	48.1	34.4	4.9	38.8	37.2	14.8	20.2	25.1	30.1	20.2	30.1	6	6	5	4	7	4	5	7	5	1
EG12801	>EG12801 mlaF Probable ABC phospholipid transporter ATP-binding protein	Peripheral inner membrane protein facing the cytoplasm	F1			Yes		4.17336	n.def	2.09212	n.def	FtsH only	FtsH only		n.def	n.def	0.693496	0.228824	n.def	n.def		13.4	0	10.4	6.3	16.7	14.9	21.2	15.2	14.9	0	4.5	8.9	9.7	4.5	0	8.9	6.3	5.2	3	0	1	1	2	2	3	3	2	0
EG12803	>EG12803 kdsD D-arabinose 5-phosphate isomerase	Cytoplasmic	A			Yes		1.33451	0.69933	0.926935	0.755961	5.37692	0.0163912		0.948369	0.935583	1.55846	0.587355	1.478	0.0981591		14.6	27.1	19.8	17.4	26.8	23.8	19.8	14.3	26.8	16.8	14.6	14.6	9.1	14	19.2	14	9.1	11.9	5	7	5	4	6	6	4	4	6	4
EG12804	>EG12804 kdsC 3-deoxy-D-manno-octulosonate 8-phosphate phosphatase	Peripheral inner membrane protein facing the cytoplasm	F1					n.def	n.def	n.def	n.def	n.def	n.def		n.def	n.def	n.def	n.def	n.def	n.def		0	14.4	0	9	12.2	0	9	5.3	12.2	0	0	9	5.3	0	9	0	9	0	0	2	0	1	1	0	1	1	1	0
EG12806	>EG12806 lptC LPS export, IM-tethered periplasmic LPS-binding protein	Integral Inner Membrane	B					0.501285	n.def	0.861164	n.def	0.833845	n.def		n.def	n.def	n.def	n.def	n.def	n.def		0	9.4	9.4	9.4	9.4	0	9.4	0	0	9.4	0	0	27.2	0	0	9.4	9.4	0	0	1	1	1	1	0	1	0	0	1
EG12815	>EG12815 nanK N-acetyl-D-mannosamine (ManNAc) kinase	Cytoplasmic	A					n.def	n.def	n.def	n.def	n.def	n.def		n.def	n.def	n.def	n.def	n.def	n.def		8.2	3.4	8.2	0	8.2	3.4	7.9	3.4	8.2	0	0	0	0	0	0	0	0	0	2	1	2	0	2	1	2	1	2	0
EG12817	>EG12817 nanR Repressor of the nan operon, induced by sialic acid	Nucleoid	N					n.def	n.def	n.def	n.def	n.def	n.def		n.def	n.def	n.def	n.def	n.def	n.def		11	6.1	6.1	4.6	0	0	0	0	0	0	6.1	0	0	0	0	0	0	0	2	1	1	1	0	0	0	0	0	0
EG12819	>EG12819 yhcM Function unknown	Cytoplasmic	A					0.665997	n.def	0.579382	0.396064	0.684858	n.def		n.def	n.def	0.85785	0.67149	n.def	n.def		0	3.2	3.2	3.2	5.6	3.2	8.8	3.2	5.6	6.9	3.2	3.2	5.9	3.2	5.9	0	0	3.2	0	1	1	1	1	1	2	1	1	2
EG12820	>EG12820 yhcN Stress-induced protein involved in cadmium and peroxide resistance	Periplasmic	G					0.0302461	n.def	1.23601	n.def	19.8937	n.def		n.def	n.def	n.def	n.def	n.def	n.def		12.6	0	12.6	0	12.6	12.6	0	12.6	12.6	0	12.6	12.6	12.6	12.6	0	12.6	12.6	12.6	1	0	1	0	1	1	0	1	1	0
EG12826	>EG12826 tldD Probable peptidase required for the maturation and secretion of the antibiotic peptide MccB17	Cytoplasmic	A					1.50103	0.421701	0.833514	0.707949	0.581699	0.335916		0.718949	0.365663	0.563575	0.258069	0.405181	0.117845		15.4	29.9	20.4	15.4	15.4	17.5	15.4	3.1	15.4	8.1	16.2	18.7	18.7	7.9	20.2	17.5	22.2	21	4	8	5	4	4	5	4	1	4	2
EG12838	>EG12838 yrdA Function unknown, low abundance protein	Cytoplasmic	A	Yes	Yes	Yes		2.30768	0.039898	3.19344	0.00343081	2.85247	0.0423073		0.503374	0.0353868	0.43104	0.0803726	0.216975	0.0334564		60.3	82.6	60.3	77.2	60.3	45.1	77.2	52.2	59.8	65.8	60.3	55.4	59.8	59.8	55.4	55.4	54.9	52.7	9	11	9	10	9	7	10	7	8	10
EG12840	>EG12840 tsaC tRNA(NNU) t(6)A37 threonylcarbamoyladenosine modification	Cytoplasmic	A					0.7843	n.def	0.982349	n.def	1.18901	0.549724		n.def	n.def	n.def	n.def	1.40176	0.494617		16.3	8.9	8.9	0	0	16.3	8.9	11.1	8.9	0	17.9	12.6	8.9	16.3	7.4	16.3	8.9	17.9	2	1	1	0	0	2	1	2	1	0
EG12851	>EG12851 ybeL Function unknown, DUF1451 family	Cytoplasmic	A					n.def	n.def	n.def	n.def	n.def	n.def		n.def	n.def	n.def	n.def	n.def	n.def		0	0	0	8.1	0	0	0	0	0	0	0	0	0	0	0	0	0	0	0	0	0	1	0	0	0	0	0	0
EG12854	>EG12854 ybgF TolA-binding protein, periplasmic, function unknown	Periplasmic	G					0.232861	n.def	0.139662	n.def	4.30014	n.def		n.def	n.def	n.def	n.def	n.def	n.def		21.3	23.6	29.7	24.7	24.7	19.8	16.3	11	16.3	10.6	16	19.4	21.3	11	24.3	11	24.7	21.3	3	3	4	3	3	3	2	2	2	2
EG12859	>EG12859 opgD Osmoregulated periplasmic glucan (OPG) biosynthesis	Periplasmic	G					n.def	n.def	n.def	n.def	n.def	n.def		n.def	n.def	n.def	n.def	n.def	n.def		2.5	0	2.4	0	0	2.4	2.4	2.2	2.2	0	2.5	0	0	0	0	2.2	0	0	1	0	1	0	0	1	1	1	1	0
EG12866	>EG12866 proQ RNA chaperone, probable regulator of ProP translation	Peripheral inner membrane protein facing the cytoplasm	F1					1.14087	0.265027	1.37667	0.166475	1.03481	0.804876		1.19259	0.527295	0.636285	0.272849	0.758827	0.468287		28	33.2	29.3	29.3	28	25	24.1	28	24.1	24.1	20.7	27.2	29.3	29.3	29.3	25	29.3	29.3	5	6	5	5	5	4	4	5	4	4
EG12868	>EG12868 yciN Function unknown, DUF2498 family	Cytoplasmic	A					n.def	n.def	n.def	n.def	n.def	n.def		n.def	n.def	n.def	n.def	n.def	n.def		45.8	10.8	0	0	10.8	42.2	21.7	10.8	21.7	10.8	21.7	10.8	31.3	21.7	0	0	20.5	20.5	3	1	0	0	1	3	2	1	2	1
EG12878	>EG12878 zapA FtsZ stabilizer, coiled-coil protein	Peripheral inner membrane protein facing the cytoplasm	F1	Yes				FtsH only	FtsH only	1.21382	n.def	0.725431	n.def		0.472562	0.0139259	0.730538	0.133861	0.345224	0.0105802		22.9	22.9	22.9	22.9	11.9	22.9	22.9	11.9	22.9	22.9	11	11	11	22.9	11	11	11	22.9	2	2	2	2	1	2	2	1	2	2
EG12879	>EG12879 ybcJ Ribosome-associated protein, function unknown	Cytoplasmic	A					0.695324	n.def	0.570916	n.def	n.def	n.def		n.def	n.def	n.def	n.def	n.def	n.def		12.9	12.9	30	30	12.9	12.9	12.9	12.9	12.9	17.1	12.9	12.9	38.6	55.7	38.6	12.9	30	38.6	1	1	2	2	1	1	1	1	1	1
EG12882	>EG12882 gss Glutathionylspermidine synthase/amidase	Cytoplasmic	A			Yes		0.0784996	n.def	1.1317	n.def	FtsH only	FtsH only		n.def	n.def	n.def	n.def	n.def	n.def		1.8	1.8	4.8	0	5	6	3.7	5.5	7.4	1.9	4.8	7.3	4.8	0	8.6	0	7.9	8.1	1	1	2	0	2	3	2	3	3	1
EG12899	>EG12899 yheO Function unknown	Cytoplasmic	A					3.60932	n.def	1.82201	n.def	n.def	n.def		0.484187	0.0422265	1.08638	0.676128	0.526012	0.019332		4.6	4.6	4.6	4.6	7.5	7.5	4.6	4.6	4.6	4.6	4.6	4.6	4.6	7.5	4.6	4.6	4.6	4.6	1	1	1	1	2	2	1	1	1	1
EG12900	>EG12900 fkpA Periplasmic peptidylprolyl cis,trans isomerase	Periplasmic	G					0.802526	0.273399	0.655531	0.67247	0.942695	0.704059		0.526858	0.351539	1.05295	0.914498	0.554755	0.0207615		37.8	38.1	33.3	24.4	30.7	24.4	30.7	30.7	30.7	33.3	29.3	34.4	30.7	27.8	30.7	30.7	30.7	30.7	10	8	7	5	6	5	6	6	6	8
EG12903	>EG12903 yheS Mutant increases recombinant antibody periplasmic production	Peripheral inner membrane protein facing the cytoplasm	F1					0.727549	0.656882	0.69506	n.def	0.816616	0.508719		n.def	n.def	n.def	n.def	0.702173	0.364016		1.7	6.1	7.8	1.7	8	6.1	9.4	8.5	6.1	3.6	6.1	3.3	5	7.8	4.4	8	9.7	4.4	1	3	4	1	4	3	5	4	3	2
EG12912	>EG12912 frlD Fructoselysine 6-kinase	Cytoplasmic	A					n.def	n.def	n.def	n.def	n.def	n.def		n.def	n.def	n.def	n.def	n.def	n.def		0	0	0	0	0	6.1	6.1	0	0	0	0	0	0	0	0	0	0	0	0	0	0	0	0	1	1	0	0	0
EG12926	>EG12926 nudE Adenosine nucleotide hydrolase	Cytoplasmic	A			Yes		1.85014	n.def	6.36626	n.def	FtsH only	FtsH only		n.def	n.def	n.def	n.def	n.def	n.def		25.3	30.1	8.1	8.1	8.1	25.3	33.3	16.1	17.2	16.1	16.1	22	8.1	16.1	39.2	23.1	17.2	16.1	3	4	1	1	1	3	4	2	2	2
EG12928	>EG12928 yrfG GMP/IMP nucleotidase	Cytoplasmic	A					n.def	n.def	2.50208	n.def	0.677645	n.def		n.def	n.def	n.def	n.def	n.def	n.def		0	0	0	5	0	5	5	0	5	0	0	0	5	0	5	0	5	0	0	0	0	1	0	1	1	0	1	0
EG12930	>EG12930 hslO Hsp33, oxidative stress-induced heat shock chaperone	Peripheral inner membrane protein facing the cytoplasm	F1	Yes	Yes	Yes		5.36055	0.00197673	17.0618	2.21644e-06	14.4718	4.81565e-05		1.45276	0.0373503	0.665987	0.00246805	0.967519	0.766985		23.6	33.2	30.1	30.1	23.6	18.5	23.6	15.4	33.2	15.4	10.3	23.6	17.5	4.1	18.5	12.3	23.6	23.6	4	6	5	5	4	3	4	3	6	3
EG12932	>EG12932 yhgF Predicted transcription accessory factor, function unknown	Peripheral inner membrane protein facing the cytoplasm	F1					0.395707	n.def	0.165601	0.0392839	1.75947	0.653334		n.def	n.def	0.923841	0.876689	n.def	n.def		4	12.3	14.9	12.4	13.8	13.6	13.7	15.4	11.9	6.3	10	14.2	10.2	11.3	13.3	10.6	12.8	13.1	3	7	8	6	8	8	8	9	8	4
EG12935	>EG12935 nfuA Fe/S biogenesis protein	Cytoplasmic	A	Yes	Yes	Yes		2.97255	0.0123511	3.42913	0.000945736	2.60108	0.00286204		1.0608	0.669403	0.67532	0.0177327	0.716376	0.067531		22.5	21.5	21.5	16.2	21.5	21.5	16.2	21.5	21.5	33	28.3	27.2	21.5	21.5	21.5	21.5	21.5	21.5	4	3	3	2	3	3	2	3	3	6
EG12936	>EG12936 hrpA Predicted ATP-dependent RNA helicase	Peripheral inner membrane protein facing the cytoplasm	F1					0.611232	n.def	n.def	n.def	n.def	n.def		n.def	n.def	n.def	n.def	n.def	n.def		0	0	1.1	1.1	1.1	2.8	1.1	1.9	1.9	2.7	3.6	1.1	0	2	0.8	1.9	2.8	1.9	0	0	1	1	1	3	1	2	2	3
EG12944	>EG12944 yhhX Putative oxidoreductase, expressed protein	Cytoplasmic	A					0.868944	0.613334	1.86102	0.093676	1.02861	0.782757		1.58441	0.107859	0.456955	0.100812	0.724003	0.336253		10.1	11.9	7.2	7.2	12.2	7.2	11.9	7.2	15.4	7.2	15.4	11.9	7.2	13.9	11.9	7.2	12.2	16.8	3	3	2	2	3	2	3	2	4	2
EG12954	>EG12954 yqjI Transcriptional repressor for yqjH, nickel- or iron-inducible	Cytoplasmic	A	Yes				2.48379	0.0276822	2.13847	0.0576583	1.82546	0.118569		1.12016	0.651899	0.554307	0.278295	0.620911	0.338222		43	58.5	55.1	55.1	39.1	38.2	39.1	43	39.1	34.3	22.7	35.3	46.9	22.7	46.4	27.1	18.8	39.6	8	9	9	11	8	6	9	8	8	7
EG12957	>EG12957 glk Glucokinase	Cytoplasmic	A					n.def	n.def	n.def	n.def	n.def	n.def		n.def	n.def	n.def	n.def	n.def	n.def		5.9	3.7	3.7	8.7	0	0	3.7	0	3.7	2.5	3.7	0	3.7	0	0	0	0	0	2	1	1	1	0	0	1	0	1	1
EG12966	>EG12966 pqiB Induced by paraquat, regulated by SoxRS	Integral Inner Membrane	B					n.def	n.def	n.def	n.def	n.def	n.def		n.def	n.def	n.def	n.def	n.def	n.def		0	0	0	0	0	0	0	0	0	0	0	2.6	2.6	0	2.6	0	2.6	0	0	0	0	0	0	0	0	0	0	0
EG12967	>EG12967 yciO Predicted RNA binding protein	Cytoplasmic	A					n.def	n.def	n.def	n.def	n.def	n.def		n.def	n.def	n.def	n.def	n.def	n.def		13.1	8.3	0	8.3	0	0	8.3	0	0	0	0	13.1	8.3	5.8	8.3	8.3	8.3	8.3	2	1	0	1	0	0	1	0	0	0
EG12979	>EG12979 yggS Pyridoxal 5-phosphate binding protein, function unknown	Cytoplasmic	A					n.def	n.def	0.386163	0.00321972	0.421486	0.10355		n.def	n.def	0.757332	0.489464	n.def	n.def		12.4	12.4	3.8	30.3	12.4	12.4	12.4	12.4	12.4	3.8	3.8	3.8	19.2	10.7	10.7	16.7	10.7	10.7	2	2	1	4	2	2	2	2	2	1
EG12980	>EG12980 yggT Confers tolerance to osmotic shock, function unknown	Integral Inner Membrane	B					n.def	n.def	n.def	n.def	n.def	n.def		n.def	n.def	n.def	n.def	n.def	n.def		0	10.1	10.1	5.3	5.3	5.3	5.3	5.3	5.3	5.3	10.1	15.4	5.3	15.4	5.3	5.3	15.4	5.3	0	1	1	1	1	1	1	1	1	1
EG12981	>EG12981 yggU Widely conserved ACR protein, UPF0235 family, function unknown	Cytoplasmic	A					n.def	n.def	n.def	n.def	n.def	n.def		n.def	n.def	n.def	n.def	n.def	n.def		0	0	0	0	0	0	0	16.7	30.2	0	0	0	0	0	0	0	16.7	0	0	0	0	0	0	0	0	1	2	0
EG12982	>EG12982 rdgB dITP/XTP pyrophosphatase, synthetic lethal with recA	Nucleoid	N					n.def	n.def	n.def	n.def	n.def	n.def		n.def	n.def	n.def	n.def	n.def	n.def		3.6	3.6	0	3.6	3.6	3.6	3.6	3.6	3.6	0	6.6	3.6	3.6	3.6	0	0	3.6	0	1	1	0	1	1	1	1	1	1	0
EG12984	>EG12984 yggX Confers protection of iron-sulfur proteins against oxidative damage	Peripheral inner membrane protein facing the cytoplasm	F1					n.def	n.def	n.def	n.def	n.def	n.def		n.def	n.def	n.def	n.def	n.def	n.def		31.9	31.9	31.9	47.3	31.9	31.9	31.9	31.9	31.9	31.9	0	31.9	31.9	31.9	31.9	31.9	31.9	31.9	2	2	2	3	2	2	2	2	2	2
EG12994	>EG12994 yghJ Large probable lipoprotein, function unknown	Inner Membrane Lipoprotein	E					1.33044	0.865831	3.15267	0.207211	1.20556	0.927934		0.847278	0.773825	0.486531	0.0643851	0.412227	0.0322014		2.2	10.9	6.5	8.2	10.6	8	9.3	5.5	8.6	7.8	8.7	10.8	7.5	9.3	9.9	9.1	7.6	8.6	2	10	7	8	11	8	9	6	9	10
EG13005	>EG13005 yghU GSH-dependent disulfide bond oxidoreductase	Peripheral inner membrane protein facing the cytoplasm	F1					n.def	n.def	n.def	n.def	n.def	n.def		n.def	n.def	n.def	n.def	n.def	n.def		6.6	0	0	0	0	0	0	0	0	3.8	6.6	6.6	6.6	0	6.6	0	0	6.6	1	0	0	0	0	0	0	0	0	1
EG13006	>EG13006 hybO Hydrogenase 2 [Ni, Fe], small subunit, periplasmic	Peripheral inner membrane protein facing the periplasm	F2			Yes		3.29138	n.def	1.56953	n.def	FtsH only	FtsH only		n.def	n.def	n.def	n.def	n.def	n.def		9.9	3.8	7.5	9.9	7.5	7.5	11.3	7.5	7.5	2.4	0	3.8	3.8	3.8	7.5	3.8	3.8	3.8	3	1	2	3	2	2	3	2	2	1
EG13007	>EG13007 yghW Function unknown	Cytoplasmic	A					1.12482	n.def	n.def	n.def	n.def	n.def		n.def	n.def	n.def	n.def	n.def	n.def		0	29.5	29.5	0	0	7.4	7.4	0	0	20	0	0	0	0	0	0	7.4	12.6	0	3	3	0	0	1	1	0	0	2
EG13011	>EG13011 yqhA Function unknown, predicted inner membrane protein, UPF0114 family	Integral Inner Membrane	B					n.def	n.def	3.02534	n.def	n.def	n.def		n.def	n.def	n.def	n.def	n.def	n.def		0	0	6.1	6.1	6.1	0	6.1	6.1	6.1	0	0	6.1	0	6.1	0	6.1	0	0	0	0	1	1	1	0	1	1	1	0
EG13014	>EG13014 yqhD Aldehyde reductase, NADPH-dependent	Peripheral inner membrane protein facing the cytoplasm	F1					0.700791	n.def	0.828793	n.def	1.64907	n.def		0.587998	0.0657381	n.def	n.def	n.def	n.def		2.8	7	7	6.7	2.8	2.8	11.1	2.8	3.9	5.4	0	0	3.1	2.8	0	0	7	6.2	1	1	1	2	1	1	3	1	1	2
EG13019	>EG13019 ygiQ Radical SAM superfamily protein, function unknown	Cytoplasmic	A					n.def	n.def	n.def	n.def	n.def	n.def		n.def	n.def	n.def	n.def	n.def	n.def		0	0	0	0	0	0	0	1.8	0	0	0	0	0	0	1.9	1.5	0	0	0	0	0	0	0	0	0	1	0	0
EG13022	>EG13022 mqsA Antitoxin for MqsR toxin	Nucleoid	N					n.def	n.def	n.def	n.def	n.def	n.def		n.def	n.def	n.def	n.def	n.def	n.def		11.5	0	22.9	0	11.5	11.5	0	11.5	11.5	0	0	0	0	0	0	0	0	0	1	0	2	0	1	1	0	1	1	0
EG13025	>EG13025 ygiW Stress-induced protein, function unknown	Periplasmic	G					n.def	n.def	n.def	n.def	n.def	n.def		n.def	n.def	n.def	n.def	n.def	n.def		6.9	0	0	6.9	0	0	0	0	0	0	0	6.9	0	0	0	6.9	0	6.9	1	0	0	1	0	0	0	0	0	0
EG13034	>EG13034 queE 7-carboxy-7-deazaguanine synthase	Cytoplasmic	A					n.def	n.def	n.def	n.def	n.def	n.def		n.def	n.def	n.def	n.def	n.def	n.def		4.5	0	5.4	0	0	4.5	0	9	0	0	0	0	0	0	0	0	0	0	1	0	1	0	0	1	0	2	0	0
EG13050	>EG13050 xdhB Xanthine dehydrogenase FAD-binding subunit	Cytoplasmic	A					n.def	n.def	n.def	n.def	n.def	n.def		n.def	n.def	n.def	n.def	n.def	n.def		6.2	0	0	0	0	0	0	0	0	0	0	0	0	0	0	0	0	0	1	0	0	0	0	0	0	0	0	0
EG13078	>EG13078 yqfB Function unknown, UPF0267 family	Cytoplasmic	A					1.21712	n.def	2.19613	n.def	1.76746	n.def		n.def	n.def	n.def	n.def	n.def	n.def		37.9	0	28.2	28.2	17.5	28.2	17.5	10.7	28.2	0	10.7	10.7	10.7	10.7	0	10.7	10.7	10.7	3	0	2	2	1	2	1	1	2	0
EG13079	>EG13079 bglA Phospho-beta-glucosidase A	Cytoplasmic	A					0.650702	n.def	n.def	n.def	1.27043	n.def		n.def	n.def	n.def	n.def	n.def	n.def		4.6	8.1	8.1	6.3	4.6	6.5	8.1	6.5	6.5	13.6	9.4	6.5	6.5	6.5	6.5	4.6	8.1	6.5	1	3	3	2	1	2	3	2	2	5
EG13082	>EG13082 csdA Cysteine desulfurase, stimulated by CsdE	Peripheral inner membrane protein facing the cytoplasm	F1					n.def	n.def	3.09874	n.def	2.90339	n.def		n.def	n.def	n.def	n.def	n.def	n.def		3.5	3.5	6.7	3.5	3.5	6.7	8.7	0	6.2	0	3.5	6.2	6.2	0	3.5	3.5	3.5	3.5	1	1	2	1	1	2	3	0	2	0
EG13083	>EG13083 csdE Binds and stimulates CsdA activity	Cytoplasmic	A	Yes				FtsH only	FtsH only	10.691	n.def	n.def	n.def		n.def	n.def	n.def	n.def	n.def	n.def		24.5	33.3	24.5	22.4	13.6	13.6	13.6	10.9	24.5	0	10.9	0	24.5	10.9	10.9	10.9	10.9	24.5	2	3	2	2	1	1	1	1	2	0
EG13084	>EG13084 tcdA tRNA threonylcarbamoyladenosine dehydratase	Integral Inner Membrane	B					n.def	n.def	n.def	n.def	0.67324	n.def		n.def	n.def	n.def	n.def	n.def	n.def		0	0	0	0	0	0	9.3	0	0	9.3	0	9.3	9.3	0	9.3	9.3	0	0	0	0	0	0	0	0	1	0	0	1
EG13086	>EG13086 amiC N-acetylmuramyl-L-alanine amidase, periplasmic	Periplasmic	G					1.03399	n.def	3.0134	0.223747	0.931107	n.def		3.44299	0.220464	n.def	n.def	n.def	n.def		5	4.1	10.3	3.6	15.3	4.1	3.6	6.5	4.1	4.1	0	4.1	7.7	6.5	4.1	7.7	10.1	7.7	2	1	3	1	4	1	1	2	1	1
EG13093	>EG13093 tas Suppresses tyrosine requirement of tyrA14 O6 strain	Cytoplasmic	A					0.607398	n.def	0.392468	n.def	0.618654	n.def		n.def	n.def	n.def	n.def	n.def	n.def		3.8	4	0	0	3.8	4	4	3.8	7.8	4	7.8	7.8	4	7.8	7.8	7.8	7.8	4	1	1	0	0	1	1	1	1	2	1
EG13109	>EG13109 truD tRNA(Glu) pseudouridine(13) synthase	Cytoplasmic	A					0.671365	n.def	1.54379	n.def	n.def	n.def		n.def	n.def	n.def	n.def	n.def	n.def		7.7	4	10.9	3.7	6.9	3.2	7.2	3.2	3.2	12.6	10.9	3.2	10.6	6.9	3.7	0	14.3	0	2	1	3	1	2	1	2	1	1	3
EG13119	>EG13119 casA CRISPR RNA (crRNA) containing Cascade antiviral complex	Cytoplasmic	A					n.def	n.def	2.33007	n.def	n.def	n.def		n.def	n.def	n.def	n.def	n.def	n.def		0	10.4	0	0	3.2	0	0	0	0	3.2	0	0	3.2	0	0	3.2	0	0	0	2	0	0	1	0	0	0	0	1
EG13132	>EG13132 znuC High-affinity ABC transport system for zinc	Peripheral inner membrane protein facing the cytoplasm	F1					n.def	n.def	n.def	n.def	n.def	n.def		n.def	n.def	n.def	n.def	n.def	n.def		10.4	6	0	0	0	0	0	5.6	5.6	0	5.2	0	0	0	0	0	0	0	2	1	0	0	0	0	0	1	1	0
EG13134	>EG13134 uup DNA-binding ATPase involved in replication	Peripheral inner membrane protein facing the cytoplasm	F1					2.69358	n.def	3.31929	n.def	1.42622	n.def		n.def	n.def	n.def	n.def	n.def	n.def		0	1.9	0	0	3.5	0	5.2	1.9	3.5	1.6	0	7.4	5	1.6	5.4	0	7.4	4.7	0	1	0	0	1	0	2	1	1	1
EG13146	>EG13146 gmhA Phosphoheptose isomerase	Cytoplasmic	A			Yes		1.35165	0.415748	1.50232	0.0422395	3.81828	0.00090655		1.08606	0.64823	0.907399	0.67821	0.985488	0.919108		13	31.8	28.1	21.4	26.6	21.4	26.6	21.9	26.6	18.8	8.9	26.6	22.9	18.8	26.6	26.6	21.4	22.9	2	6	5	4	5	4	5	4	5	4
EG13148	>EG13148 yafK Required for biofilm production in enteroaggregative E. coli	Periplasmic	G					n.def	n.def	n.def	n.def	n.def	n.def		n.def	n.def	n.def	n.def	n.def	n.def		8.9	0	0	0	0	0	0	0	0	0	0	0	0	0	0	0	0	0	2	0	0	0	0	0	0	0	0	0
EG13155	>EG13155 ais Predicted LPS core heptose(II)-phosphate phosphatase	Periplasmic	G			Yes		2.32627	0.35901	2.88085	0.0909832	9.29975	0.000429313		0.337297	0.260475	0.80106	0.703088	0.270195	0.0532989		38	38.5	31	31	37	31	31	25	31	31	31	31	31	22	31	31	31	22	6	6	4	4	5	4	4	3	4	4
EG13161	>EG13161 dsdC Transcriptional activator for dsdA	Nucleoid	N					n.def	n.def	n.def	n.def	n.def	n.def		n.def	n.def	n.def	n.def	n.def	n.def		0	0	4.5	0	4.5	5.1	0	4.5	4.5	0	0	2.9	0	0	0	0	0	0	0	0	1	0	1	1	0	1	1	0
EG13170	>EG13170 yqcA Function unknown	Cytoplasmic	A					n.def	n.def	n.def	n.def	0.770678	n.def		n.def	n.def	n.def	n.def	n.def	n.def		0	0	0	12.1	0	0	17.4	0	0	12.1	0	12.1	0	0	0	0	12.1	12.1	0	0	0	1	0	0	1	0	0	1
EG13173	>EG13173 queF 7-cyano-7-deazaguanine reductase (NADPH-dependent)	Cytoplasmic	A					0.511703	n.def	0.476693	n.def	0.760308	n.def		n.def	n.def	n.def	n.def	n.def	n.def		12.1	12.1	16.3	18.4	0	14.5	14.5	4.6	5.7	8.5	0	10.3	0	10.3	5.7	0	10.3	0	3	2	3	3	0	3	3	1	1	2
EG13176	>EG13176 yaiI Downregulated by beryllium, UPF0178 family, function unknown	Cytoplasmic	A					n.def	n.def	0.41834	n.def	2.26534	n.def		n.def	n.def	n.def	n.def	n.def	n.def		9.9	9.9	0	0	0	9.2	0	9.9	0	0	9.9	0	0	9.9	9.9	0	0	9.9	1	1	0	0	0	1	0	1	0	0
EG13177	>EG13177 rseB Binds periplasmic domain of anti-RpoE sigma factor RseA	Periplasmic	G					n.def	n.def	n.def	n.def	n.def	n.def		n.def	n.def	n.def	n.def	n.def	n.def		4.4	4.4	4.4	4.4	4.4	4.4	4.4	4.4	4.4	0	0	4.4	4.1	4.4	0	0	4.4	0	1	1	1	1	1	1	1	1	1	0
EG13183	>EG13183 ydbK Probable pyruvate-flavodoxin oxidoreductase	Cytoplasmic	A					2.88416	n.def	2.32975	0.136894	4.37069	n.def		n.def	n.def	0.948984	0.9446	n.def	n.def		1.1	5.4	3.8	4.3	1.9	5	5.4	5.1	2.6	4.3	0	2.7	4.3	2.7	6	0.9	4.3	2	1	5	3	4	2	5	4	5	3	5
EG13184	>EG13184 elaA Predicted acetyltransferase, function unknown	Cytoplasmic	A					n.def	n.def	n.def	n.def	n.def	n.def		n.def	n.def	n.def	n.def	n.def	n.def		7.8	0	0	0	0	0	0	0	0	0	0	0	0	0	0	0	0	0	1	0	0	0	0	0	0	0	0	0
EG13186	>EG13186 ldhA D-lactate dehydrogenase, NAD-dependent	Cytoplasmic	A					0.884246	n.def	1.53525	n.def	2.58495	0.119149		n.def	n.def	n.def	n.def	0.782762	0.729866		15.8	8.2	4.3	4.3	0	10.9	10.9	10.3	4.3	9.4	12.5	16.1	13.4	9.4	20.1	16.1	12.5	12.5	4	2	1	1	0	2	2	3	1	2
EG13190	>EG13190 rstA Multicopy suppressor of yjeE, yeaZ or ygjD deletion lethality	Nucleoid	N	Yes				FtsH only	FtsH only	1.42179	n.def	4.75803	0.0104267		n.def	n.def	n.def	n.def	1.77313	0.391965		13	16.7	12.6	0	16.7	4.2	4.2	4.2	12.6	8.4	4.2	0	4.2	4.2	4.2	4.2	10.5	8.4	3	3	2	0	3	1	1	1	2	2
EG13192	>EG13192 ratB Second gene in ratAB toxin operon, function unknown	Cytoplasmic	A					1.21228	n.def	1.22835	n.def	0.619749	0.223145		0.889085	0.590208	0.502378	0.126648	0.446656	0.100744		22.9	14.6	22.9	14.6	14.6	22.9	22.9	22.9	14.6	14.6	22.9	8.3	22.9	22.9	22.9	14.6	14.6	22.9	2	1	2	1	1	2	2	2	1	1
EG13193	>EG13193 ratA Toxic protein, inhibits 70S ribosome formation	Cytoplasmic	A					n.def	n.def	n.def	n.def	n.def	n.def		n.def	n.def	n.def	n.def	n.def	n.def		0	0	0	0	0	10.8	0	0	0	0	10.8	10.8	0	0	0	10.8	0	10.8	0	0	0	0	0	1	0	0	0	0
EG13198	>EG13198 yfjL Function unknown, CP4-57 putative defective prophage	Cytoplasmic	A					n.def	n.def	n.def	n.def	n.def	n.def		n.def	n.def	n.def	n.def	n.def	n.def		0	0	0	0	0	0	0	0	0	0	0	0	0	0	4.6	0	0	0	0	0	0	0	0	0	0	0	0	0
EG13216	>EG13216 cof HMP-PP phosphatase	Cytoplasmic	A					n.def	n.def	n.def	n.def	n.def	n.def		n.def	n.def	n.def	n.def	n.def	n.def		0	3.7	3.7	0	0	0	0	0	0	0	0	0	0	0	0	0	0	0	0	1	1	0	0	0	0	0	0	0
EG13220	>EG13220 tilS tRNA(Ile) lysidine (L34) synthase, ATP-dependent	Cytoplasmic	A					n.def	n.def	n.def	n.def	n.def	n.def		n.def	n.def	n.def	n.def	n.def	n.def		0	3.5	3.5	0	0	0	0	3.5	0	0	0	3.5	0	3.5	3.5	0	3.5	0	0	1	1	0	0	0	0	1	0	0
EG13221	>EG13221 rof anti-Rho (termination factor)	Cytoplasmic	A					n.def	n.def	n.def	n.def	n.def	n.def		n.def	n.def	n.def	n.def	n.def	n.def		20.2	20.2	20.2	20.2	20.2	20.2	20.2	20.2	0	20.2	20.2	20.2	20.2	20.2	20.2	20.2	20.2	0	1	1	1	1	1	1	1	1	0	1
EG13226	>EG13226 ftsK DNA translocase at septal ring sorting daughter chromsomes	Integral Inner Membrane	B					0.58858	n.def	5.40022	n.def	1.16375	n.def		n.def	n.def	n.def	n.def	0.582985	0.0557854		1.1	3.2	2.9	2.1	2.1	0	2.2	1.1	2.9	2.2	1	0	1.1	1.1	2.2	1	2.9	2.2	1	3	3	2	2	0	2	1	3	2
EG13242	>EG13242 yecJ Function unknown	Cytoplasmic	A					n.def	n.def	n.def	n.def	n.def	n.def		n.def	n.def	n.def	n.def	n.def	n.def		18.1	18.1	0	0	0	0	0	0	0	0	0	0	0	0	0	0	0	0	1	1	0	0	0	0	0	0	0	0
EG13246	>EG13246 copA Copper-, silver-translocating P-type ATPase efflux pump	Integral Inner Membrane	B					n.def	n.def	n.def	n.def	n.def	n.def		n.def	n.def	n.def	n.def	n.def	n.def		0	3.5	0	0	0	0	0	1.9	0	1.4	3.8	1.4	0	0	1.4	0	0	0	0	1	0	0	0	0	0	1	0	1
EG13249	>EG13249 ppiD Periplasmic folding chaperone, has an inactive PPIase domain	Integral Inner Membrane	B	Yes		Yes		5.90404	0.00576068	2.8196	0.0567797	4.28579	0.0021173		0.892168	0.440504	0.611722	0.00530256	0.545759	0.00626239		28.3	50.7	37.1	40	41.7	44.6	34.8	34	36.8	22.5	31	40.4	21.5	20.1	34.3	30	25.2	24.6	13	20	16	16	17	18	14	15	16	12
EG13252	>EG13252 queC 7-cyano-7-deazaguanine (preQ0) synthase	Cytoplasmic	A					2.18645	0.182437	4.76155	n.def	n.def	n.def		n.def	n.def	n.def	n.def	n.def	n.def		15.2	7.4	10	10.4	0	5.2	5.2	5.2	12.6	10	10	15.2	15.2	0	15.2	5.2	10.4	0	2	1	1	2	0	1	1	1	2	1
EG13258	>EG13258 qmcA Multicopy suppressor of ftsH htpX double mutant	Integral Inner Membrane	B					n.def	n.def	n.def	n.def	n.def	n.def		n.def	n.def	n.def	n.def	n.def	n.def		0	0	0	0	0	0	0	0	0	0	0	0	4.9	0	0	0	0	4.9	0	0	0	0	0	0	0	0	0	0
EG13261	>EG13261 ybbN DnaK co-chaperone, thioredoxin-like protein	Cytoplasmic	A					0.790719	0.514706	0.583138	0.513939	1.34511	0.350828		0.685146	0.538827	1.43651	0.562136	0.984218	0.970584		16.2	23.6	26.8	28.2	23.6	14.1	36.6	16.9	41.2	16.9	16.9	23.6	21.5	16.9	23.6	29.9	28.2	23.6	2	3	4	4	3	2	4	2	5	2
EG13262	>EG13262 ybbO Predicted oxidoreductase, COG1028 family	Nucleoid, Peripheral inner membrane protein facing the cytoplasm	N,F1					n.def	n.def	n.def	n.def	n.def	n.def		n.def	n.def	n.def	n.def	n.def	n.def		8.2	11.9	8.2	11.9	11.9	8.2	8.2	12.3	11.9	8.2	8.2	8.2	0	8.2	8.2	8.2	8.2	8.2	1	2	1	2	2	1	1	2	2	1
EG13271	>EG13271 panE 2-dehydropantoate 2-reductase, NADPH-dependent	Outer Membrane Lipoprotein	I					0.565545	n.def	n.def	n.def	n.def	n.def		n.def	n.def	n.def	n.def	n.def	n.def		3.6	0	0	0	0	3.6	0	0	0	2.3	0	0	3.6	0	0	3.6	3.6	0	1	0	0	0	0	1	0	0	0	1
EG13272	>EG13272 yajL Covalent chaperone for sulfenylated thiol proteins	Cytoplasmic	A					n.def	n.def	n.def	n.def	n.def	n.def		n.def	n.def	n.def	n.def	n.def	n.def		4.1	0	4.1	0	0	4.1	4.1	4.1	4.1	0	0	0	16.8	5.1	0	0	16.8	0	1	0	1	0	0	1	1	1	1	0
EG13273	>EG13273 thiI tRNA s(4)U8 sulfurtransferase, activated by IscS	Cytoplasmic	A					0.762831	0.256914	0.686105	0.626892	1.03442	0.73037		0.810132	0.731493	0.824724	0.724249	0.668135	0.180392		5	17.6	13.7	14.3	12	17	16	6.6	22.8	11.8	7.3	11.4	18	7.5	11.2	7.3	16.2	9.3	2	7	5	5	5	6	6	3	9	6
EG13289	>EG13289 yqgE Function unknown, low abundance protein	Cytoplasmic	A					n.def	n.def	n.def	n.def	n.def	n.def		n.def	n.def	n.def	n.def	n.def	n.def		14.4	8.6	8.6	0	8.6	0	0	0	0	0	8.6	8.6	0	8.6	8.6	0	0	0	2	1	1	0	1	0	0	0	0	0
EG13290	>EG13290 yqgF Putative anti-termination factor for Rho-dependent terminators	Cytoplasmic	A					n.def	n.def	n.def	n.def	n.def	n.def		n.def	n.def	n.def	n.def	n.def	n.def		0	0	0	0	0	0	0	0	0	0	0	9.4	0	0	0	0	0	0	0	0	0	0	0	0	0	0	0	0
EG13294	>EG13294 yaiL Function unknown	Cytoplasmic	A					n.def	n.def	n.def	n.def	n.def	n.def		n.def	n.def	n.def	n.def	n.def	n.def		11.7	0	0	0	0	0	0	0	0	0	11.7	0	14.5	0	0	0	0	0	1	0	0	0	0	0	0	0	0	0
EG13295	>EG13295 frmB S-formylglutathione hydrolase, formaldehyde degradation	Cytoplasmic	A					n.def	n.def	n.def	n.def	n.def	n.def		n.def	n.def	n.def	n.def	n.def	n.def		0	0	0	0	0	0	0	0	0	6.1	0	6.1	0	0	0	0	0	0	0	0	0	0	0	0	0	0	0	1
EG13296	>EG13296 frmR Negative regulator of the frmRAB operon	Cytoplasmic	A					n.def	n.def	n.def	n.def	n.def	n.def		n.def	n.def	n.def	n.def	n.def	n.def		0	26.4	26.4	26.4	0	15.4	15.4	15.4	15.4	15.4	0	0	15.4	15.4	0	11	15.4	15.4	0	2	2	2	0	1	1	1	1	1
EG13300	>EG13300 tauA Periplasmic taurine binding protein, TauABC transporter	Periplasmic	G					n.def	n.def	n.def	n.def	n.def	n.def		n.def	n.def	n.def	n.def	n.def	n.def		3.1	0	0	0	0	0	0	0	0	5.6	9.4	0	0	0	5.6	0	0	0	1	0	0	0	0	0	0	0	0	1
EG13305	>EG13305 ybgI Conserved metal-binding protein, NIF3 family, function unknown	Cytoplasmic	A					n.def	n.def	n.def	n.def	n.def	n.def		n.def	n.def	n.def	n.def	n.def	n.def		0	7.7	7.7	6.5	0	7.7	7.7	0	7.7	0	7.7	0	0	0	0	0	0	0	0	1	1	1	0	1	1	0	1	0
EG13306	>EG13306 ybgJ Predicted allophanate hydrolase, subunit 1	Cytoplasmic	A					2.03175	n.def	n.def	n.def	1.10618	n.def		n.def	n.def	n.def	n.def	n.def	n.def		0	5.5	0	0	0	0	0	0	5.5	0	5.5	5.5	5.5	5.5	6	11.5	5.5	0	0	1	0	0	0	0	0	0	1	0
EG13307	>EG13307 ybgK Predicted allophanate hydrolase, subunit 2	Cytoplasmic	A					0.0349429	n.def	n.def	n.def	n.def	n.def		n.def	n.def	n.def	n.def	n.def	n.def		2.9	2.9	2.9	0	2.9	0	0	2.9	2.9	3.5	6.5	2.9	2.9	2.9	2.9	0	0	0	1	1	1	0	1	0	0	1	1	1
EG13324;EG12682	>EG13324 ybiS L,D-transpeptidase linking Lpp to murein, periplasmic	Peripheral outer membrane protein facing the periplasm	F3					0.669719	0.268097	0.684418	0.804023	0.365306	0.0651015		1.00398	0.995921	0.573562	0.396216	0.575844	0.105363		28.1	30.4	33.3	36.3	27.5	24.2	32.7	15.4	27.5	18.3	19.3	27.1	33	18.3	24.8	27.1	24.2	24.2	6	6	5	6	5	4	6	3	5	4
EG13325	>EG13325 ybiT Function unknown, ABC transporter family	Peripheral inner membrane protein facing the cytoplasm	F1					0.722652	0.327231	1.43355	0.454516	0.671196	0.239163		1.67021	0.0475005	0.463851	0.0111536	0.774729	0.238191		16	29.1	21.7	20.8	19.4	24.9	23.2	19.8	21.5	27.7	26.2	21.1	21.1	24.7	24.9	28.7	24.7	17.5	7	9	9	9	9	10	9	8	9	11
EG13327	>EG13327 ybiV Sugar phosphatase	Cytoplasmic	A					n.def	n.def	n.def	n.def	n.def	n.def		n.def	n.def	n.def	n.def	n.def	n.def		0	0	4.1	0	5.5	15.5	4.1	9.6	14	4.1	0	0	4.1	4.1	0	0	0	0	0	0	1	0	1	2	1	2	2	1
EG13330	>EG13330 gloB Glyoxalase II, hydroxyacylglutathione hydrolase, Zn(2+) cofactor	Cytoplasmic	A					0.303807	n.def	0.443293	n.def	n.def	n.def		n.def	n.def	n.def	n.def	n.def	n.def		4	4	10	10	0	10	14.7	4	4	0	4	4	14.7	11.2	10	6	4	4	1	1	2	2	0	2	2	1	1	0
EG13352	>EG13352 abgA p-Aminobenzoyl-glutamate hydrolase, A subunit	Cytoplasmic	A	Yes				FtsH only	FtsH only	0.533594	0.373276	0.488281	n.def		0.416842	0.3416	n.def	n.def	n.def	n.def		8.9	32.3	22.9	6.2	11.5	13.1	0	3.7	0	2.5	5	2.8	11	5.3	11.5	0	0	3	3	10	8	2	4	4	0	1	0	1
EG13354	>EG13354 smrA DNA endonuclease, function unknown	Cytoplasmic	A					n.def	n.def	n.def	n.def	n.def	n.def		n.def	n.def	n.def	n.def	n.def	n.def		5.9	0	0	10.2	0	0	0	0	0	0	0	0	0	0	0	0	0	5.9	1	0	0	2	0	0	0	0	0	0
EG13357	>EG13357 ttcA Required for the formation of 2-thiocytidine s(2)C32 in tRNA	Cytoplasmic	A					n.def	n.def	n.def	n.def	22.327	n.def		n.def	n.def	n.def	n.def	n.def	n.def		5.8	12.2	10	0	12.2	3.5	0	3.5	5.1	0	6.4	6.4	8.7	3.5	0	0	12.2	12.2	2	2	2	0	2	1	0	1	1	0
EG13377	>EG13377 mtfA Mlc anti-repressor	Peripheral inner membrane protein facing the cytoplasm	F1					n.def	n.def	n.def	n.def	n.def	n.def		n.def	n.def	n.def	n.def	n.def	n.def		0	0	0	6	0	3.8	0	0	0	0	0	0	6	0	6	0	0	0	0	0	0	1	0	1	0	0	0	0
EG13382	>EG13382 yeeN Function unknown, UPF0082 family	Cytoplasmic	A					7.91385	0.00463165	3.24181	n.def	2.18778	0.247202		n.def	n.def	n.def	n.def	0.46082	0.388236		8.8	5.5	13	0	8.8	26.5	5.5	17.2	8.8	5.5	5.5	8.8	23.1	8.8	5.5	8.8	5.5	13.9	2	1	3	0	2	4	1	3	2	1
EG13391	>EG13391 yeeX Function unknown, UPF0265 family	Cytoplasmic	A					n.def	n.def	1.40044	n.def	n.def	n.def		n.def	n.def	n.def	n.def	n.def	n.def		0	40.4	26.6	40.4	14.7	0	52.3	0	52.3	0	0	0	40.4	0	0	25.7	0	0	0	2	2	2	1	0	3	0	3	0
EG13393	>EG13393 yeeZ Function unknown	Periplasmic	G					n.def	n.def	1.19457	n.def	1.0521	n.def		n.def	n.def	n.def	n.def	n.def	n.def		6.9	11.7	8.4	8.4	3.6	9.9	11.7	8.4	11.7	0	18.2	11.7	11.7	9.9	21.9	3.3	11.7	18.2	2	2	1	1	1	2	2	1	2	0
EG13395	>EG13395 iscU Iron-sulfur cluster assembly scaffold protein	Peripheral inner membrane protein facing the cytoplasm	F1					2.33312	0.00675608	3.33257	0.00359587	2.18682	0.01267		0.902412	0.513219	0.522966	0.00341866	0.471931	0.000134772		19.5	10.9	10.9	10.9	10.9	19.5	10.9	19.5	10.9	33.6	26.6	19.5	19.5	19.5	19.5	26.6	19.5	19.5	2	1	1	1	1	2	1	2	1	4
EG13397	>EG13397 iscR Transcriptional repressor for isc operon	Nucleoid	N	Yes				FtsH only	FtsH only	3.65963	0.0033619	3.67912	n.def		0.412756	0.00233751	n.def	n.def	n.def	n.def		43.8	59.9	43.8	59.9	19.8	19.8	44.4	0	53.7	0	13.6	19.8	13.6	13.6	35.2	13.6	29	13.6	4	5	4	5	2	2	4	0	4	0
EG13405	>EG13405 yecM Function unknown, low abundance protein	Cytoplasmic	A					n.def	n.def	n.def	n.def	n.def	n.def		n.def	n.def	n.def	n.def	n.def	n.def		16	0	0	0	0	0	0	0	0	0	0	0	0	0	9.6	0	0	0	2	0	0	0	0	0	0	0	0	0
EG13406	>EG13406 wzzB Regulator of lipopolysaccharide O-chain length	Integral Inner Membrane	B		Yes	Yes		1.6846	0.520491	9.87717	0.00633405	5.68634	0.0224895		0.885299	0.551781	0.80606	0.0848071	0.713605	0.0721342		13.8	3.4	3.4	18.1	21.5	16.3	18.1	12.9	6.4	13.2	12	21.5	16.3	12.9	15	15.3	15	8.9	3	1	1	6	5	4	5	3	2	3
EG13407	>EG13407 ugd UDP-glucose 6-dehydrogenase	Cytoplasmic	A	Yes				3.35229	0.00546087	1.20735	0.600621	2.87035	0.1099		0.730112	0.367025	0.875452	0.607468	0.639178	0.0225318		21.4	18.6	16.8	17.3	24.7	24.2	24.2	24.2	16.8	15.5	7.7	20.4	24.7	8.8	20.6	20.6	19.6	14.7	6	5	5	5	7	7	7	8	5	5
EG13408	>EG13408 slyA Activates crytpic hemolysin gene hlyE	Nucleoid	N					1.55689	n.def	0.839536	n.def	1.44536	n.def		n.def	n.def	n.def	n.def	n.def	n.def		7.6	22.2	0	14.6	0	0	22.2	7.6	7.6	7.6	0	0	0	7.6	0	7.6	17.4	9.7	1	2	0	1	0	0	2	1	1	1
EG13409	>EG13409 slyB Novel verified lipoprotein, function unknown	Outer Membrane Lipoprotein	I					1.8635	0.0249563	3.48529	0.0646361	0.891249	0.690244		0.981456	0.91517	0.692668	0.120858	0.679823	0.118931		32.9	31.6	31.6	47.7	32.9	25.2	25.2	31	32.9	38.7	31.6	31	31	25.2	31.6	31.6	31	31.6	3	3	3	3	3	2	2	3	3	4
EG13416	>EG13416 hldE Heptose 7-P kinase/heptose 1-P adenyltransferase	Cytoplasmic	A	Yes	Yes	Yes		7.81862	0.0156562	3.57227	0.00943834	5.95244	0.00164947		0.766396	0.489873	1.06417	0.847845	0.815576	0.216448		23.3	36.5	24.1	24.5	31	30.4	37.5	28.7	33.8	23.3	24.1	18.2	23.7	22.4	29.6	18.7	27	24.5	9	13	8	9	12	11	13	11	11	9
EG13420	>EG13420 ydhF Predicted aldo/keto NAD(P) oxidoreductase, function unknown	Cytoplasmic	A					1.05051	n.def	0.350226	n.def	1.29624	n.def		n.def	n.def	n.def	n.def	n.def	n.def		8.4	4.4	8.4	4.4	0	4.4	4	0	8.4	0	4.4	8.4	8.4	8.4	4.4	8.4	4.4	4.4	2	1	2	1	0	1	1	0	2	0
EG13421	>EG13421 gloA Glyoxalase I, lactoylglutathione lyase, Ni(2+) cofactor	Cytoplasmic	A					n.def	n.def	0.56767	n.def	0.481694	n.def		n.def	n.def	n.def	n.def	n.def	n.def		10.4	5.2	5.2	22.2	5.2	5.2	5.2	10.4	5.2	10.4	5.2	22.2	10.4	22.2	22.2	5.2	22.2	22.2	2	1	1	3	1	1	1	2	1	2
EG13431	>EG13431 lpoB OM lipoprotein stimulator of MrcB transpeptidase	Outer Membrane Lipoprotein	I					n.def	n.def	n.def	n.def	n.def	n.def		n.def	n.def	n.def	n.def	n.def	n.def		13.6	0	6.6	6.6	6.6	0	0	0	0	0	0	0	0	0	0	0	0	0	2	0	1	1	1	0	0	0	0	0
EG13433	>EG13433 nagZ beta-N-Acetylglucosaminidase	Cytoplasmic	A		Yes	Yes		2.05486	0.0695974	2.39062	0.00176669	3.54461	0.000173475		0.940026	0.790753	0.684275	0.112227	0.643236	0.0292906		21.4	29.9	15.2	34.3	25.8	20.2	29.3	22.3	27	32	15.2	15.2	18.2	18.2	14.1	6.7	10	7	6	8	4	8	7	5	7	5	6	8
EG13434	>EG13434 ycfP Predicted esterase, UPF0227 protein, function unknown	Cytoplasmic	A	Yes	Yes	Yes		2.51476	0.0155404	2.39875	0.00388815	2.19897	0.0420939		1.0764	0.476877	0.778293	0.40929	0.837754	0.540652		37.8	37.8	37.8	42.2	37.8	37.8	47.2	32.8	37.8	46.1	33.3	23.3	33.3	23.3	26.7	33.3	33.3	23.3	5	5	5	6	5	5	7	5	5	7
EG13439	>EG13439 lolC LolA-dependent release of lipoproteins from inner membrane	Integral Inner Membrane	B					1.39807	n.def	0.570372	n.def	0.399829	n.def		n.def	n.def	n.def	n.def	n.def	n.def		3.8	7	3.3	3.8	3.8	3.8	3.8	3.8	3.8	3.8	7	0	0	0	3.3	7	0	3.8	1	2	1	1	1	1	1	1	1	1
EG13440	>EG13440 lolD LolA-dependent release of lipoproteins from inner membrane	Peripheral inner membrane protein facing the cytoplasm	F1					n.def	n.def	n.def	n.def	0.490176	n.def		n.def	n.def	n.def	n.def	n.def	n.def		12	12	6	0	12	6	6	6	12	0	0	6	12	6	6	0	12	0	2	2	1	0	2	1	1	1	2	0
EG13452	>EG13452 trmJ tRNA mC32,mU32 2-O-methyltransferase, SAM-dependent	Peripheral inner membrane protein facing the cytoplasm	F1	Yes				2.74349	0.00165161	2.36513	0.0591266	2.19158	0.341613		0.604129	0.40392	0.85613	0.713611	0.517213	0.00258135		26.8	15.9	15.4	13.4	15	22	26.8	19.9	15	17.9	26.8	26.8	13.4	22	26.8	19.9	22	22	5	3	3	3	3	4	5	4	3	3
EG13466	>EG13466 yphE Putative ABC transporter ATP-binding protein	Peripheral inner membrane protein facing the cytoplasm	F1					5.90542	n.def	1.27269	0.176224	2.3963	n.def		n.def	n.def	0.969281	0.905552	n.def	n.def		0	3.2	3.2	3.2	3.2	3.2	3.2	3.2	3.2	3.2	3.2	3.2	3.2	3.2	3.2	3.2	3.2	0	0	1	1	1	1	1	1	1	1	1
EG13471	>EG13471 fsaA Fructose-6-phosphate aldolase A	Cytoplasmic	A					n.def	n.def	n.def	n.def	n.def	n.def		n.def	n.def	n.def	n.def	n.def	n.def		8.2	0	0	0	0	0	0	0	0	0	0	0	0	0	0	0	0	0	1	0	0	0	0	0	0	0	0	0
EG13473	>EG13473 gsiB Glutathione-binding protein, periplasmic	Periplasmic	G					0.350971	n.def	2.15245	n.def	n.def	n.def		n.def	n.def	n.def	n.def	n.def	n.def		2.5	3.7	0	0	2.5	7.4	4.3	0	0	4.7	0	0	2.5	2.5	0	0	0	2.5	1	1	0	0	1	2	2	0	0	2
EG13478	>EG13478 rimO Ribosomal protein S12 methylthiotransferase	Cytoplasmic	A	Yes	Yes			3.52063	0.0257978	4.24392	0.000414359	4.81842	0.00357154		0.839402	0.127612	0.68229	0.0685887	0.572716	0.0278454		26.1	29.3	26.1	27.7	28.3	28.3	37	12	32.2	17.5	11.6	15.4	14.3	12	11.6	8.2	5.4	8.2	7	8	7	7	7	7	10	3	8	5
EG13481	>EG13481 gstB Glutathione transferase, iodoacetate-, bromoacetate-specific	Cytoplasmic	A					n.def	n.def	n.def	n.def	n.def	n.def		n.def	n.def	n.def	n.def	n.def	n.def		9.1	9.1	9.1	9.1	9.1	0	9.1	0	16.8	4.3	0	0	0	3.8	9.1	0	9.1	9.1	1	1	1	1	1	0	1	0	2	1
EG13492	>EG13492 mipA MltA-interacting protein	Outer Membrane b-barrel protein	H					0.730829	n.def	0.324285	n.def	1.73367	0.505381		n.def	n.def	n.def	n.def	0.895845	0.624657		5.2	5.2	11.3	15.7	11.3	5.2	22.6	5.2	11.3	11.3	5.2	6	16.5	16.5	16.5	11.3	17.3	11.3	1	1	2	3	2	1	4	1	2	2
EG13497	>EG13497 yeaK Function unknown, homologous to YbaK and an insertion domain in ProS	Cytoplasmic	A					2.26449	n.def	1.68708	n.def	1.17844	n.def		n.def	n.def	n.def	n.def	n.def	n.def		6	0	0	0	6	6	6	6	0	6	0	6	0	6	7.8	6	6	6	1	0	0	0	1	1	1	1	0	1
EG13502	>EG13502 yeaP Diguanylate cyclase	Cytoplasmic	A					n.def	n.def	n.def	n.def	n.def	n.def		n.def	n.def	n.def	n.def	n.def	n.def		0	4.1	0	4.1	0	3.8	0	0	0	0	0	0	0	0	0	0	0	0	0	1	0	1	0	1	0	0	0	0
EG13514	>EG13514 yoaB Putative reactive intermediate deaminase, UPF0076 family							n.def	n.def	23.3919	n.def	1.15549	n.def		n.def	n.def	n.def	n.def	n.def	n.def		0	0	0	11.4	0	11.4	11.4	11.4	11.4	0	0	18.4	11.4	47.4	0	0	11.4	0	0	0	0	1	0	1	1	1	1	0
EG13523	>EG13523 csiD Carbon starvation induced gene, function unknown	Cytoplasmic	A					n.def	n.def	n.def	n.def	n.def	n.def		n.def	n.def	n.def	n.def	n.def	n.def		0	9.8	5.8	0	0	0	0	0	0	0	0	0	0	0	0	0	0	0	0	2	1	0	0	0	0	0	0	0
EG13530	>EG13530 yqaB Fructose-1-P and 6-phosphogluconate phosphatase	Cytoplasmic	A					n.def	n.def	n.def	n.def	n.def	n.def		n.def	n.def	n.def	n.def	n.def	n.def		19.7	0	9	19.7	0	9	9	0	0	0	0	0	0	0	0	0	0	0	2	0	1	2	0	1	1	0	0	0
EG13535	>EG13535 dsbG Thiol:disulfide interchange protein, periplasmic	Periplasmic	G					n.def	n.def	n.def	n.def	n.def	n.def		n.def	n.def	n.def	n.def	n.def	n.def		0	0	0	0	0	5.2	0	4.4	0	0	0	0	0	0	0	0	0	0	0	0	0	0	0	1	0	1	0	0
EG13546	>EG13546 nemA Chromate reductase, quinone reductase, FMN-linked	Cytoplasmic	A					0.9499	0.85619	2.15422	0.20422	1.03904	0.939884		1.07655	0.828012	0.714361	0.482683	0.769046	0.482069		29	22.2	24.4	29	31	28.2	26	9.6	29	12.3	18.1	17.8	18.1	17.3	23.3	23	21.6	21.4	6	5	5	6	6	6	5	3	6	3
EG13560	>EG13560 yagU Required for acid resistance, inner membrane protein, DUF1440 family	Integral Inner Membrane	B					1.00007	n.def	n.def	n.def	0.511489	n.def		1.21034	0.355066	n.def	n.def	n.def	n.def		12.7	5.4	5.4	10.8	5.4	5.4	10.8	5.4	12.7	7.4	5.4	0	0	0	0	5.4	5.4	5.4	2	1	1	2	1	1	2	1	2	1
EG13578	>EG13578 wcaN Putative regulatory subunit for GalU	Cytoplasmic	A					n.def	n.def	n.def	n.def	n.def	n.def		n.def	n.def	n.def	n.def	n.def	n.def		11.8	19.5	7.4	19.9	11.8	0	23.2	4	15.2	0	4	8.4	11.8	4	11.8	7.7	16.2	4	2	4	2	3	2	0	4	1	3	0
EG13583	>EG13583 ykgF Electron transport protein with ferridoxin-like domain	Cytoplasmic	A					n.def	n.def	n.def	n.def	1.48185	n.def		n.def	n.def	n.def	n.def	n.def	n.def		0	2.5	2.5	0	2.5	0	12.2	2.3	12	0	0	0	8	4.2	12.4	6.7	8.4	6.7	0	1	1	0	1	0	5	1	5	0
EG13584	>EG13584 ykgG DUF162 protein, predicted lactate-related catabolism	Cytoplasmic	A					0.770861	n.def	n.def	n.def	1.34356	n.def		n.def	n.def	n.def	n.def	n.def	n.def		13.4	7.4	13.4	11.7	6.1	10	19	13.4	25.1	0	11.3	0	7.4	13.4	19	7.4	13.4	19	2	1	2	2	1	2	3	2	4	0
EG13595	>EG13595 yahK Predicted oxidoreductase, function unknown	Peripheral inner membrane protein facing the cytoplasm	F1	Yes	Yes	Yes		FtsH only	FtsH only	FtsH only	FtsH only	FtsH only	FtsH only		1.33015	0.450892	0.787144	0.501812	1.04702	0.853182		6	9.7	6	9.7	9.7	6	11.2	6	9.7	3.2	0	0	0	0	11.7	0	0	0	2	2	2	2	2	2	3	2	2	1
EG13612	>EG13612 dxs DXP synthase	Peripheral inner membrane protein facing the cytoplasm	F1			Yes		2.16797	0.450349	4.23907	n.def	6.46969	0.000530849		1.03783	0.937256	1.2801	0.624927	1.32852	0.229794		4.5	5.8	3.5	1.5	8.9	6	15.3	8.1	8.1	0	7.9	8.4	5.6	4.2	5.6	8.1	5.6	6	2	3	2	1	4	3	7	4	4	0
EG13613	>EG13613 yajQ Cell survival gene, function unknown, UPF0234 family	Cytoplasmic	A					0.592964	0.12795	0.416956	0.0638344	0.517585	0.106452		1.18058	0.646644	1.03068	0.937846	1.2168	0.551636		52.1	44.2	45.4	53.4	52.1	60.1	50.9	44.2	50.9	32.5	46.6	50.9	50.9	40.5	42.9	36.2	32.5	32.5	6	5	5	6	6	7	6	5	6	4
EG13616	>EG13616 allR Repressor for all (allantoin) and gcl (glyoxylate) operons	Nucleoid	N					1.67283	n.def	n.def	n.def	n.def	n.def		n.def	n.def	n.def	n.def	n.def	n.def		10.3	7	7	3.3	7	7	15.5	7.4	7	10.3	7	10.3	7	3.3	10.3	7	7	7	3	2	2	1	2	2	4	2	2	3
EG13654	>EG13654 ybeX Heat shock protein, putative Co2+ and Mg2+ efflux protein	Cytoplasmic	A					0.17203	n.def	3.02541	n.def	n.def	n.def		n.def	n.def	n.def	n.def	n.def	n.def		0	0	2.4	6.5	0	2.4	0	0	0	7.5	6.5	6.5	6.5	2.4	2.4	2.4	0	6.5	0	0	1	2	0	1	0	0	0	2
EG13655	>EG13655 ybeY rRNA maturation factor	Cytoplasmic	A					n.def	n.def	n.def	n.def	n.def	n.def		n.def	n.def	n.def	n.def	n.def	n.def		0	9.7	9.7	9.7	9.7	0	9.7	0	0	9.7	9.7	9.7	9.7	9.7	9.7	9.7	9.7	9.7	0	1	1	1	1	0	1	0	0	1
EG13656	>EG13656 ybeZ Heat shock protein, PhoH paralog, function unknown	Peripheral inner membrane protein facing the cytoplasm	F1	Yes	Yes	Yes		3.54886	0.00767958	5.03665	0.00214083	2.37552	0.0240507		1.05459	0.781355	0.667515	0.105348	0.703953	0.212139		30.9	30.6	34.7	35.3	33.8	26	30.1	24.3	33.8	22.5	26.9	40.8	25.4	22.8	27.7	28.9	23.4	29.2	7	7	8	8	8	6	7	7	8	6
EG13657	>EG13657 miaB tRNA-i(6)A37 methylthiotransferase	Cytoplasmic	A	Yes		Yes		3.3733	0.0301274	9.69475	0.069616	3.45472	0.0230038		0.830877	0.54588	0.742109	0.253029	0.616602	0.000692212		18.8	38.2	45.4	28.5	35.9	36.5	30.4	28.3	35.4	22.6	25.5	28.9	21.3	27.4	29.1	20.3	25.9	26.8	7	15	15	10	13	13	10	12	12	9
EG13658	>EG13658 ubiF 2-octaprenyl-3-methyl-6-methoxy-1,4-benzoquinol hydroxylase	Cytoplasmic	A					n.def	n.def	n.def	n.def	n.def	n.def		n.def	n.def	n.def	n.def	n.def	n.def		0	0	3.3	0	0	0	0	0	0	0	0	3.3	0	0	3.3	0	0	0	0	0	1	0	0	0	0	0	0	0
EG13666	>EG13666 ybhJ AcnA homolog, function unknown	Cytoplasmic	A					n.def	n.def	n.def	n.def	0.116024	n.def		n.def	n.def	n.def	n.def	n.def	n.def		0	0	0	0	0	0	0	0	2.8	0	1.9	1.9	0	0	0	0	1.9	1.9	0	0	0	0	0	0	0	0	1	0
EG13683	>EG13683 ybjN Negative regulator of motility	Cytoplasmic	A					n.def	n.def	0.199413	n.def	n.def	n.def		n.def	n.def	n.def	n.def	n.def	n.def		0	0	0	0	0	7.6	0	7.6	7.6	0	7.6	0	0	7.6	0	0	0	0	0	0	0	0	0	1	0	1	1	0
EG13688	>EG13688 ybjS Function unknown	Peripheral inner membrane protein facing the cytoplasm	F1					59.3346	n.def	2.00435	n.def	n.def	n.def		n.def	n.def	n.def	n.def	n.def	n.def		14.8	0	0	3.6	5.6	0	3.6	7.1	9.2	3.6	3.6	3.6	0	3.6	3.6	0	0	0	3	0	0	1	1	0	1	2	2	1
EG13690	>EG13690 ltaE L-allo-threonine aldolase	Cytoplasmic	A					0.573182	0.919653	2.089	n.def	n.def	n.def		n.def	n.def	n.def	n.def	n.def	n.def		10.8	6.9	7.5	11.7	8.4	11.7	4.2	4.2	4.2	11.7	10.5	14.7	12	18.6	14.7	11.4	10.5	14.7	3	2	2	3	2	3	1	1	1	3
EG13693	>EG13693 ybjX Function unknown, homologous to somA (S.t.) and virK (S.f.)	Peripheral inner membrane protein facing the cytoplasm	F1		Yes			12.2588	0.0336972	6.40491	0.0148151	2.48799	n.def		0.965369	0.932272	n.def	n.def	n.def	n.def		10	7.6	3.9	12.7	9.1	8.5	9.1	0	5.2	3.9	6.4	9.1	9.1	3.9	10.3	3.9	6.7	6.1	3	2	1	3	2	2	2	0	1	1
EG13694	>EG13694 macA Membrane fusion protein (MFP) for macrolide efflux	Peripheral inner membrane protein facing the cytoplasm	F1					n.def	n.def	n.def	n.def	n.def	n.def		n.def	n.def	n.def	n.def	n.def	n.def		0	0	0	0	4.9	4.9	0	0	0	0	0	0	0	0	0	0	0	0	0	0	0	0	1	1	0	0	0	0
EG13699	>EG13699 ycaO Ribosomal protein S12 methylthiotransferase accessory factor	Cytoplasmic	A	Yes	Yes	Yes		2.5096	0.0473769	3.06781	0.00242957	2.28274	0.0140171		0.501622	0.0624569	0.659983	0.0770466	0.331062	0.00123781		10.9	12.3	11.4	4.8	6.5	4.8	6.3	6.3	6.3	1.7	11.6	8.7	8.5	4.8	14.7	6.3	7.7	9.9	4	5	5	2	3	2	3	3	3	1
EG13704	>EG13704 ycbL Glyoxalase II homolog, function unknown	Cytoplasmic	A					n.def	n.def	2.28718	n.def	1.76632	n.def		n.def	n.def	n.def	n.def	n.def	n.def		4.7	17.2	10.7	15.8	11.2	4.7	15.8	6	15.8	18.6	12.1	28.4	16.3	11.2	27.9	10.7	17.7	12.6	1	2	2	2	1	1	2	1	2	3
EG13716	>EG13716 ycbX 6-N-hydroxylaminopurine resistance, function unknown	Cytoplasmic	A					n.def	n.def	n.def	n.def	n.def	n.def		n.def	n.def	n.def	n.def	n.def	n.def		8.4	13.3	3.8	0	3.8	3.8	3.8	8.4	3.8	0	3.8	3.8	0	3.8	0	3.8	0	3.8	2	3	1	0	1	1	1	2	1	0
EG13717	>EG13717 rlmL Fused 23S rRNA m(2)G2445 and m(7)G2069 methyltransferase	Cytoplasmic	A					n.def	n.def	n.def	n.def	n.def	n.def		n.def	n.def	n.def	n.def	n.def	n.def		2.1	2.1	2.1	2.1	2.1	2.1	4	2.1	0	4.3	4.3	6.7	4.3	4.3	6.1	0	6.1	4	1	1	1	1	1	1	2	1	0	2
EG13718	>EG13718 ycbZ Function unknown, S16 peptidase family	Peripheral inner membrane protein facing the cytoplasm	F1					n.def	n.def	n.def	n.def	n.def	n.def		n.def	n.def	n.def	n.def	n.def	n.def		0	8.4	5.5	0	0	0	0	0	0	0	0	0	0	0	0	0	0	0	0	2	1	0	0	0	0	0	0	0
EG13723	>EG13723 yccU Function unknown, oleic-acid induced	Cytoplasmic	A					n.def	n.def	1.61625	n.def	n.def	n.def		n.def	n.def	n.def	n.def	n.def	n.def		0	10.9	0	8	0	8	8	8	8	0	0	0	0	8	0	0	0	0	0	1	0	1	0	1	1	1	1	0
EG13725	>EG13725 rlmI 23S rRNA m(5)C1962 methyltransferase, SAM-dependent	Peripheral inner membrane protein facing the cytoplasm	F1					0.868755	n.def	0.407202	0.0960029	1.07392	0.737614		n.def	n.def	0.964451	0.912057	n.def	n.def		0	6.1	2.3	6.1	2.3	5.1	2.3	7.6	5.1	6.3	6.3	10.1	2.3	6.3	7.3	2.3	8.8	6.1	0	2	1	2	1	2	1	3	2	2
EG13759	>EG13759 ydcP Function unknown, U32 peptidase family	Cytoplasmic	A	Yes	Yes	Yes		FtsH only	FtsH only	FtsH only	FtsH only	FtsH only	FtsH only		1.06196	0.886044	0.762538	0.37444	0.809787	0.426487		6.9	11.6	13.3	3.8	11.6	10.4	17.6	7.8	9.2	0	0	2.6	0	2.8	0	0	1.5	1.7	4	6	6	2	6	5	8	4	4	0
EG13768	>EG13768 ydcY Function unknown	Cytoplasmic	A					n.def	n.def	n.def	n.def	n.def	n.def		n.def	n.def	n.def	n.def	n.def	n.def		0	0	0	11.7	0	0	11.7	11.7	11.7	0	0	0	0	0	0	13	0	0	0	0	0	1	0	0	1	1	1	0
EG13774	>EG13774 yncD Putative TonB-dependent outer membrane receptor	Outer Membrane b-barrel protein	H					n.def	n.def	n.def	n.def	n.def	n.def		n.def	n.def	n.def	n.def	n.def	n.def		1.7	0	0	2.3	0	0	0	0	0	1.7	0	1.9	0	0	0	0	1.9	0	1	0	0	1	0	0	0	0	0	1
EG13775	>EG13775 yncE DNA-binding, ATP-binding periplasmic protein, function unknown	Periplasmic	G					0.799075	n.def	n.def	n.def	n.def	n.def		n.def	n.def	n.def	n.def	n.def	n.def		7.1	3.4	4.2	4.2	0	0	7.6	4.2	0	3.4	6.2	10.5	4.2	10.5	7.6	7.6	7.6	7.1	2	1	1	1	0	0	2	1	0	1
EG13780	>EG13780 nhoA N-hydroxyarylamine O-acetyltransferase	Cytoplasmic	A		Yes	Yes		0.943379	0.749336	FtsH only	FtsH only	FtsH only	FtsH only		0.546741	0.446523	0.544203	0.128093	0.297538	0.0529723		9.6	9.6	4.3	9.6	12.8	18.1	18.9	12.8	18.9	9.6	5.3	9.6	0	5.3	0	0	0	0	2	2	1	2	2	3	3	2	3	2
EG13817	>EG13817 sad Succinate semialdehyde dehydrogenase, NAD(P)(+)-dependent	Cytoplasmic	A					n.def	n.def	n.def	n.def	n.def	n.def		n.def	n.def	n.def	n.def	n.def	n.def		0	0	0	0	0	0	0	0	0	0	0	0	0	3	0	0	0	3	0	0	0	0	0	0	0	0	0	0
EG13818	>EG13818 yneJ LysR-family transcriptional regulator, lamB regulator	Cytoplasmic	A			Yes		n.def	n.def	n.def	n.def	FtsH only	FtsH only		n.def	n.def	0.428615	0.0972823	n.def	n.def		25.3	8.2	11.6	3.4	17.1	17.1	22.9	25.3	17.1	0	0	0	0	0	8.2	8.2	0	0	4	1	2	1	3	3	4	4	3	0
EG13837;EG13233	>EG13837 gnsB Multicopy suppressor of secG(Cs) and fabA6(Ts), Qin prophage;>EG13233 gnsA Multicopy suppressor of null secG(Cs) and fabA6(Ts)	Cytoplasmic	A					n.def	n.def	n.def	n.def	n.def	n.def		n.def	n.def	n.def	n.def	n.def	n.def		0	0	0	0	0	0	0	0	0	17.5	21.1	0	0	0	0	0	0	0	0	0	0	0	0	0	0	0	0	1
EG13847	>EG13847 dmsD Redox enzyme maturation protein (REMP) for DmsA	Peripheral inner membrane protein facing the cytoplasm	F1					n.def	n.def	n.def	n.def	n.def	n.def		n.def	n.def	n.def	n.def	n.def	n.def		0	0	0	0	0	6.4	0	0	0	0	0	0	0	0	0	0	0	0	0	0	0	0	0	1	0	0	0	0
EG13861	>EG13861 efeO Inactive acid-inducible low-pH ferrous ion transporter EfeUOB	Periplasmic	G					1.18964	n.def	0.762737	0.753407	1.07401	0.642903		n.def	n.def	0.92782	0.863206	n.def	n.def		0	15.5	9.3	5.1	7.7	14.1	9.3	18.9	11.5	2.9	6.4	9.3	5.1	2.9	16	9.3	11.5	9.3	0	4	2	2	2	3	2	4	3	1
EG13869	>EG13869 ghrA Glyoxylate/hydroxypyruvate reductase A	Cytoplasmic	A			Yes		1.3983	0.269354	2.2794	0.853304	4.22053	0.00300631		1.47198	0.222885	0.58381	0.0562763	0.859354	0.596839		17.3	34	14.1	37.8	13.8	19.9	25.6	11.9	17.3	6.7	21.5	26.9	21.8	9	20.5	9	14.4	14.4	3	6	3	8	3	5	6	3	4	2
EG13870	>EG13870 ycdX Alkaline phosphatase	Cytoplasmic	A					2.63602	n.def	4.42368	n.def	2.70951	n.def		n.def	n.def	n.def	n.def	n.def	n.def		8.2	8.2	8.2	11	8.2	4.5	14.7	7.8	8.2	8.2	8.2	7.8	11	8.2	8.2	8.2	8.2	0	2	2	2	2	2	1	3	2	2	2
EG13871	>EG13871 ycdY YcdX chaperone	Peripheral inner membrane protein facing the cytoplasm	F1					0.743194	0.325145	0.562799	0.225088	0.289323	n.def		0.723574	0.23191	n.def	n.def	n.def	n.def		16.3	14.1	27.2	31.5	21.2	13	14.1	0	16.3	14.1	6	22.3	22.3	13	19	8.2	27.2	27.2	2	2	4	5	3	2	2	0	2	2
EG13887	>EG13887 bluF Anti-repressor for BluR(YcgE), blue light-responsive	Cytoplasmic	A					n.def	n.def	n.def	n.def	n.def	n.def		n.def	n.def	n.def	n.def	n.def	n.def		3.2	5.2	5.2	0	0	0	0	0	0	0	0	0	0	0	0	0	0	0	1	1	1	0	0	0	0	0	0	0
EG13892	>EG13892 pliG Inhibitor of g-type lysozyme, periplasmic	Periplasmic	G	Yes				2.79938	0.0289006	2.93277	0.374934	1.20315	0.484975		1.02199	0.94753	0.85169	0.775201	0.87042	0.812901		54.9	49.6	49.6	40.6	48.9	48.9	48.9	49.6	49.6	29.3	52.6	29.3	40.6	29.3	49.6	49.6	49.6	49.6	6	5	5	4	4	4	4	5	5	3
EG13893	>EG13893 ycgL Function unknown, UPF0745 family	Cytoplasmic	A					n.def	n.def	n.def	n.def	n.def	n.def		n.def	n.def	n.def	n.def	n.def	n.def		0	0	0	0	0	0	0	0	0	17.5	0	9.3	9.3	9.3	0	9.3	9.3	9.3	0	0	0	0	0	0	0	0	0	2
EG13896	>EG13896 cvrA Required for growth at low osmolarity	Integral Inner Membrane	B					n.def	n.def	n.def	n.def	n.def	n.def		n.def	n.def	n.def	n.def	n.def	n.def		0	0	0	0	0	0	0	0	0	0	0	0	0	2.2	0	0	0	0	0	0	0	0	0	0	0	0	0	0
EG13900	>EG13900 dhaL Dihydroxyacetone kinase, PTS-dependent ADP-binding subunit II	Cytoplasmic	A					n.def	n.def	n.def	n.def	n.def	n.def		n.def	n.def	n.def	n.def	n.def	n.def		0	0	0	0	0	15.7	0	0	0	0	0	0	0	0	0	0	0	0	0	0	0	0	0	1	0	0	0	0
EG13901	>EG13901 dhaK Dihydroxyacetone kinase, PTS-dependent, dihydroxyacetone-binding subunit	Cytoplasmic	A					n.def	n.def	n.def	n.def	n.def	n.def		n.def	n.def	n.def	n.def	n.def	n.def		5.1	6.2	0	0	0	0	0	0	6.2	0	0	0	0	0	0	0	0	6.2	1	1	0	0	0	0	0	0	1	0
EG13905	>EG13905 yciT Global regulator of transcription, DeoR family	Nucleoid	N					0.474534	n.def	2.08478	0.400459	n.def	n.def		n.def	n.def	n.def	n.def	n.def	n.def		12.4	10	16.9	21.7	12.4	18.1	0	8.4	10	4.4	16.5	12.4	20.1	4	20.9	4	19.7	6.8	2	2	3	3	2	3	0	1	2	1
EG13908	>EG13908 puuA gamma-Glutamylputrescine synthase, ATP-dependent	Cytoplasmic	A					n.def	n.def	n.def	n.def	n.def	n.def		n.def	n.def	n.def	n.def	n.def	n.def		0	0	0	0	0	0	3.6	3.6	0	0	0	0	0	0	0	0	0	0	0	0	0	0	0	0	1	1	0	0
EG13929	>EG13929 ydgH Predicted periplasmic protein, YhcN family, function unknown	Periplasmic	G					1.38901	0.654473	3.56458	0.419859	0.301156	0.102552		0.864878	0.264184	0.482049	0.330722	0.416913	0.280841		25.5	33.1	34.1	31.2	32.2	29.9	29.9	29	28	26.1	33.4	31.2	32.2	29.6	36.9	30.9	36	36.9	6	8	8	7	7	6	6	6	6	7
EG13931	>EG13931 ydgJ Predicted oxidoreductase	Cytoplasmic	A					1.07197	0.739643	0.74897	n.def	0.659391	0.292032		0.800349	0.51128	0.481672	0.174585	0.385506	0.125265		3.2	3.2	6.9	11.3	3.2	3.2	3.2	3.2	6.9	3.2	3.2	3.2	2.3	5.5	9.2	3.2	3.2	5.5	1	1	2	3	1	1	1	1	2	1
EG13935	>EG13935 rsxC Electron transport complex protein required for the reduction of SoxR	Peripheral inner membrane protein facing the cytoplasm	F1					n.def	n.def	n.def	n.def	n.def	n.def		n.def	n.def	n.def	n.def	n.def	n.def		0	4.9	4.9	0	0	4.9	4.9	6.4	4.9	0	0	7.3	0	0	4.9	0	0	0	0	1	1	0	0	1	1	2	1	0
EG13937	>EG13937 rsxG Required for the reduction of SoxR	Periplasmic	G					n.def	n.def	n.def	n.def	n.def	n.def		n.def	n.def	n.def	n.def	n.def	n.def		5.8	0	0	0	0	0	0	0	0	0	0	0	0	0	0	5.3	5.3	0	1	0	0	0	0	0	0	0	0	0
EG13940	>EG13940 pdxY Pyridoxamine kinase	Cytoplasmic	A	Yes	Yes	Yes		FtsH only	FtsH only	FtsH only	FtsH only	FtsH only	FtsH only		0.618419	0.36902	1.06945	0.884872	0.661368	0.167102		15.3	19.9	10.8	16.7	18.1	18.1	22.3	18.1	18.1	15.3	0	0	0	4.5	5.6	5.2	4.5	0	3	4	2	4	4	4	5	4	4	3
EG13942	>EG13942 anmK Anhydro-N-acetylmuramic acid kinase, murein recycling	Cytoplasmic	A					n.def	n.def	n.def	n.def	n.def	n.def		n.def	n.def	n.def	n.def	n.def	n.def		0	0	0	0	0	0	0	0	5.7	0	0	0	0	0	4.3	0	0	4.3	0	0	0	0	0	0	0	0	1	0
EG13951	>EG13951 ydhQ Function unknown	Cytoplasmic	A					n.def	n.def	n.def	n.def	n.def	n.def		n.def	n.def	n.def	n.def	n.def	n.def		0	0	0	0	0	0	0	0	0	3.6	3.6	0	0	5	0	0	3.6	0	0	0	0	0	0	0	0	0	0	1
EG13952	>EG13952 ydhR Predicted monooxygenase, function unknown	Cytoplasmic	A					0.919653	0.595581	1.52438	0.625951	0.76573	0.670029		0.828569	0.46445	0.871137	0.712672	0.721796	0.425726		24.8	32.7	32.7	14.9	22.8	22.8	22.8	32.7	22.8	38.6	32.7	46.5	46.5	32.7	32.7	32.7	36.6	32.7	2	3	3	1	2	2	2	3	2	3
EG13956	>EG13956 ydhV Predicted oxidoreductase, function unknown	Cytoplasmic	A					n.def	n.def	n.def	n.def	n.def	n.def		n.def	n.def	n.def	n.def	n.def	n.def		0	0	0	0	0	0	0	1.6	1.6	0	1.6	0	0	0	0	0	0	0	0	0	0	0	0	0	0	1	1	0
EG13962	>EG13962 sufS Cysteine desulfurase, stimulated by SufE	Peripheral inner membrane protein facing the cytoplasm	F1					n.def	n.def	n.def	n.def	n.def	n.def		n.def	n.def	n.def	n.def	n.def	n.def		2.5	0	0	0	0	0	5.4	1.7	0	0	0	0	0	0	0	0	0	0	1	0	0	0	0	0	1	1	0	0
EG13968	>EG13968 ydiI Acyl-CoA esterase in vitro	Cytoplasmic	A					n.def	n.def	n.def	n.def	n.def	n.def		n.def	n.def	n.def	n.def	n.def	n.def		0	0	0	0	0	0	13.2	13.2	0	0	0	22.1	0	0	0	0	0	0	0	0	0	0	0	0	1	1	0	0
EG13969	>EG13969 ydiJ Predicted FAD-linked oxidoreductase, function unknown	Peripheral inner membrane protein facing the cytoplasm	F1	Yes				FtsH only	FtsH only	0.826892	0.635699	1.17964	n.def		0.555146	0.289564	0.837058	0.589818	0.464689	0.0173801		3.5	3.5	3.8	5.8	4.4	4.4	4.4	2.4	3.5	1.2	3.8	3.8	4.4	2.4	4.6	4.4	2.4	2.4	2	2	2	3	2	2	2	1	2	1
EG13980	>EG13980 ydiU Function unknown, UPF0061 family	Cytoplasmic	A					n.def	n.def	n.def	n.def	n.def	n.def		n.def	n.def	n.def	n.def	n.def	n.def		0	0	0	0	2.7	0	0	0	0	0	0	0	2.7	0	0	0	0	0	0	0	0	0	1	0	0	0	0	0
EG13987	>EG13987 yniB Function unknown	Integral Inner Membrane	B					n.def	n.def	1.22285	n.def	n.def	n.def		n.def	n.def	n.def	n.def	n.def	n.def		6.2	0	6.2	0	6.2	0	0	0	0	0	0	0	7.3	0	0	0	0	0	1	0	1	0	1	0	0	0	0	0
EG13988	>EG13988 yniC 2-deoxyglucose-6-P phosphatase	Cytoplasmic	A					0.820378	0.503061	0.989298	n.def	1.21007	0.97074		n.def	n.def	n.def	n.def	0.49592	0.0112079		4.5	18	18	11.3	11.7	4.5	23	15.8	15.8	15.8	7.2	12.2	21.6	5	18.5	5	18.5	18.5	1	3	3	2	2	1	4	3	3	3
EG13990	>EG13990 ydjN Predicted symporter, function unknown	Integral Inner Membrane	B					0.176987	0.0101607	0.674367	0.605777	0.415292	0.110826		1.38233	0.500557	0.807205	0.708898	1.11583	0.746707		8.9	8.9	8.9	10.8	13.2	12.3	16.6	8.9	12.3	9.7	13.2	16.4	13.2	15.8	13.2	15.8	13.2	13.2	3	3	3	3	4	4	5	3	4	3
EG13999	>EG13999 astC Succinylornithine transaminase, arginine catabolism	Cytoplasmic	A					1.51507	0.518306	5.5158	0.123184	3.21305	0.592869		0.553954	0.208994	0.29993	0.0333832	0.166147	0.0202604		34.7	48.8	44.1	28.1	36.7	32.5	15.5	21.7	18	35	38.4	32	18	11.8	18	21.4	18	10.1	9	13	13	8	10	8	4	5	4	11
EG14014	>EG14014 yebO Predicted inner membrane protein, function unknown	Integral Inner Membrane	B					n.def	n.def	n.def	n.def	n.def	n.def		n.def	n.def	n.def	n.def	n.def	n.def		16.8	0	0	0	0	0	16.8	16.8	0	0	0	0	16.8	0	0	0	0	0	1	0	0	0	0	0	1	1	0	0
EG14018	>EG14018 kdgR Regulator of kdgK, kdgT, eda	Nucleoid	N					0.723663	0.0562321	1.00849	0.937812	1.58128	0.328827		1.17218	0.236711	0.914341	0.637251	1.07177	0.645777		21.3	33.5	34.6	31.6	17.1	21.3	23.6	27.4	18.6	6.1	30	28.1	24.3	20.2	23.2	19	28.1	23.2	4	7	7	6	3	4	5	6	3	1
EG14020	>EG14020 msrC Free methionine-(R)-sulfoxide reductase	Cytoplasmic	A		Yes			0.901041	0.765851	FtsH only	FtsH only	0.827484	0.0528533		1.22227	0.614478	0.457581	0.0231907	0.559285	0.0544991		10.3	20	14.5	20	20	10.3	20	20	20	14.5	14.5	24.2	20	9.1	14.5	20	20	20	2	3	2	3	3	2	3	3	3	3
EG14022	>EG14022 yebT Function unknown	Integral Inner Membrane	B					n.def	n.def	n.def	n.def	n.def	n.def		n.def	n.def	n.def	n.def	n.def	n.def		0	0	0	0	0	0	0	1.8	0	0	0	1.6	0	0	0	0	0	0	0	0	0	0	0	0	0	1	0	0
EG14023	>EG14023 rsmF 16S rRNA m(5)C1407 methyltransferase, SAM-dependent	Cytoplasmic	A					n.def	n.def	n.def	n.def	n.def	n.def		n.def	n.def	n.def	n.def	n.def	n.def		0	0	0	0	0	4.4	0	0	0	0	0	0	0	0	0	0	0	0	0	0	0	0	0	1	0	0	0	0
EG14027	>EG14027 yebY DUF2511 family protein, function unknown,	Periplasmic	G					n.def	n.def	n.def	n.def	1.44305	n.def		n.def	n.def	n.def	n.def	n.def	n.def		0	8	0	0	0	21.2	21.2	8	29.2	0	0	29.2	21.2	0	0	0	21.2	21.2	0	1	0	0	0	1	1	1	2	0
EG14029	>EG14029 yobA CopC family protein, function unknown	Periplasmic	G					2.49322	0.0881424	2.26029	0.00386751	3.81919	0.00420311		0.639776	0.0162954	1.14031	0.337496	0.729542	0.0776652		8.1	8.1	8.1	29	6.5	6.5	6.5	6.5	6.5	0	8.1	8.1	6.5	6.5	6.5	8.1	6.5	6.5	2	2	2	2	1	1	1	1	1	0
EG14033	>EG14033 cmoA tRNA cmo(5)U34 methyltransferase, SAM-dependent	Cytoplasmic	A					0.978916	n.def	1.08465	0.38289	3.03166	0.1334		0.805315	0.506322	1.12612	0.795019	0.906878	0.863424		15	6.5	19.4	15.8	6.5	11.7	15.8	11.7	11.7	11.7	6.5	10.5	15.8	11.7	10.5	11.7	11.7	11.7	3	1	4	3	1	2	3	2	2	2
EG14034	>EG14034 cmoB tRNA mo(5)U34 methyltransferase, SAM-dependent	Cytoplasmic	A					0.455728	n.def	n.def	n.def	n.def	n.def		n.def	n.def	n.def	n.def	n.def	n.def		0	4	0	0	0	0	0	0	0	0	0	3.7	0	0	0	4	3.7	0	0	1	0	0	0	0	0	0	0	0
EG14047	>EG14047 yedY Membrane-anchored, periplasmic TMAO, DMSO reductase	Peripheral inner membrane protein facing the periplasm	F2					n.def	n.def	n.def	n.def	n.def	n.def		n.def	n.def	n.def	n.def	n.def	n.def		0	0	0	0	0	0	0	0	0	5.7	0	0	0	0	0	0	0	0	0	0	0	0	0	0	0	0	0	2
EG14049	>EG14049 zinT Periplasmic zinc and cadmium binding protein	Periplasmic	G					1.43328	n.def	1.19055	0.558478	0.954539	0.647334		n.def	n.def	0.723659	0.261967	n.def	n.def		15.3	21.3	12	12	12	12	12	12	12	12	15.7	12	12	12	14.8	12	12	12	3	3	2	2	2	2	2	2	2	2
EG14050	>EG14050 yodB Cytochrome b561 homolog, function unknown	Integral Inner Membrane	B					n.def	n.def	1.81572	n.def	n.def	n.def		n.def	n.def	n.def	n.def	n.def	n.def		0	0	0	0	0	5.1	0	5.1	0	0	5.1	5.1	5.1	5.1	0	0	0	0	0	0	0	0	0	1	0	1	0	0
EG14060	>EG14060 yegQ Function unknown, U32 peptidase family	Cytoplasmic	A					1.27867	0.346876	1.6834	n.def	1.22693	n.def		0.932547	0.8973	n.def	n.def	n.def	n.def		9.3	10.6	9.3	3.5	4.6	6.4	4.6	4	9.3	9.1	12.6	10.2	10.6	2	9.1	9.1	6.6	6.6	3	3	3	1	1	2	1	2	3	4
EG14062	>EG14062 fbaB Fructose 1,6-bisphosphate aldolase, class I	Peripheral inner membrane protein facing the cytoplasm	F1					n.def	n.def	n.def	n.def	n.def	n.def		n.def	n.def	n.def	n.def	n.def	n.def		9.1	0	0	0	0	0	0	6	0	0	0	0	0	0	0	0	0	0	2	0	0	0	0	0	0	1	0	0
EG14068	>EG14068 thiD Phosphomethylpyrimidine kinase, HMP-P kinase	Cytoplasmic	A	Yes				FtsH only	FtsH only	1.99153	n.def	n.def	n.def		n.def	n.def	n.def	n.def	n.def	n.def		12.4	36.1	36.1	20.7	6.8	0	0	0	6.8	0	0	0	6.8	0	0	0	0	0	2	5	5	3	1	0	0	0	1	0
EG14069	>EG14069 thiM Hydroxyethylthiazole kinase	Cytoplasmic	A	Yes				FtsH only	FtsH only	7.84161	n.def	4.62865	n.def		0.502383	0.158839	0.510345	0.0369369	0.256388	0.00196556		21.4	13.7	21.4	7.6	14.1	7.6	12.6	7.6	7.6	14.9	0	7.6	0	7.6	0	7.6	0	7.6	3	2	3	1	2	1	2	1	1	2
EG14075	>EG14075 lpxT Lipid A 1-diphosphate synthase	Integral Inner Membrane	B					n.def	n.def	n.def	n.def	n.def	n.def		n.def	n.def	n.def	n.def	n.def	n.def		4.2	3	4.2	4.2	4.2	0	4.2	4.2	4.2	4.2	0	4.2	4.2	4.2	4.2	0	4.2	4.2	1	1	1	1	1	0	1	1	1	1
EG14087	>EG14087 yfaY Inactive PncC domain protein, function unknown	Cytoplasmic	A					n.def	n.def	n.def	n.def	n.def	n.def		n.def	n.def	n.def	n.def	n.def	n.def		7	3.2	0	3.2	3.2	3.8	0	0	0	0	5	3.2	3.2	3.2	0	6.2	7	0	2	1	0	1	1	1	0	0	0	0
EG14089	>EG14089 arnB UDP-4-amino-4-deoxy-L-arabinose synthase	Cytoplasmic	A					1.4437	0.302282	1.34617	0.64941	1.60617	0.48769		1.04674	0.787989	0.441031	0.268608	0.461647	0.279586		23.2	29.8	24	28	26.4	24.5	29	17.4	29.3	21.4	23.7	25.1	25.9	15	29	17.4	20.8	26.9	6	8	7	8	7	7	8	5	8	6
EG14090	>EG14090 arnC Undecaprenyl phosphate-aminoarabinose synthase	Integral Inner Membrane	B					1.02434	0.906082	1.02646	0.972646	1.18928	0.45679		1.18197	0.673083	0.916863	0.841003	1.08371	0.818647		13.7	21.1	17.4	19.6	17.4	19.6	19.6	10.2	16.1	12.1	20.8	20.8	19.6	12.1	20.8	20.8	17.1	19.6	3	6	4	5	5	5	5	3	4	3
EG14091	>EG14091 arnA UDP-glucuronate dehydrogenase and UDP-ara4N formyltransferase	Peripheral inner membrane protein facing the cytoplasm	F1			Yes		1.50928	0.610595	1.97488	0.156709	3.2524	0.0121797		1.17086	0.847525	1.24245	0.797444	1.45474	0.506679		17.3	42.7	48.6	40	44.8	40	48.6	38.5	47.1	33.5	37.4	30.9	34.4	38.5	40.3	37.3	40.8	34.4	10	22	27	22	25	22	26	20	25	20
EG14092	>EG14092 arnD Undecaprenyl phosphate-aminoarabinose deformylase	Peripheral inner membrane protein facing the cytoplasm	F1					1.86861	n.def	n.def	n.def	2.68499	n.def		n.def	n.def	n.def	n.def	n.def	n.def		6.1	6.1	3.7	0	6.1	8.4	0	4.7	2.4	2.4	0	0	0	2.4	2.4	3.7	2.4	0	2	2	1	0	2	3	0	2	1	1
EG14093	>EG14093 arnT 4-amino-4-deoxy-L-arabinose(Ara4N):Lipid A transferase	Integral Inner Membrane	B					0.378065	0.0922294	0.705297	0.727077	0.883635	n.def		2.02912	0.237173	n.def	n.def	n.def	n.def		2.9	2.9	2.9	2.9	2.9	1.6	2.9	0	0	2.9	2.9	4.5	2.9	2.9	2.9	2.9	2.9	2.9	1	1	1	1	1	1	1	0	0	1
EG14101	>EG14101 alaA Valine--pyruvate aminotransferase 2	Cytoplasmic	A	Yes				FtsH only	FtsH only	5.09868	n.def	2.64039	n.def		0.509876	0.147338	0.813644	0.48732	0.414857	0.00883648		9.9	14.6	11.9	9.9	14.3	4.2	9.9	4.2	9.9	0	5.7	4.2	0	0	4.2	5.2	0	0	2	4	3	2	4	1	2	1	2	0
EG14102	>EG14102 yfbR 5-nucleotidase	Cytoplasmic	A					n.def	n.def	n.def	n.def	n.def	n.def		n.def	n.def	n.def	n.def	n.def	n.def		5.5	0	0	0	0	0	0	0	0	0	0	0	5	0	0	0	0	5	1	0	0	0	0	0	0	0	0	0
EG14104	>EG14104 yfbT Sugar phosphatase	Cytoplasmic	A					1.20378	n.def	1.3699	n.def	1.68604	n.def		n.def	n.def	n.def	n.def	n.def	n.def		12	24.1	0	8.3	5.1	5.1	20.4	5.1	17.1	5.1	0	12	29.2	12	12	6.9	13.4	6.9	2	3	0	1	1	1	3	1	2	1
EG14105	>EG14105 yfbU Cell death gene, function unknown, UPF0304 family	Cytoplasmic	A	Yes		Yes		2.91296	0.00199714	1.65063	0.0304855	2.16476	0.00730893		0.876176	0.592453	1.14782	0.578404	1.00569	0.956958		25	25.6	24.4	33.5	39	25	29.3	34.1	33.5	24.4	38.4	33.5	33.5	38.4	38.4	33.5	38.4	38.4	5	4	4	5	7	4	4	5	5	4
EG14107	>EG14107 yfcD Predicted NUDIX hydrolase, function unknown	Cytoplasmic	A					1.47956	n.def	1.63939	0.242615	1.09068	0.601803		n.def	n.def	1.0544	0.871887	n.def	n.def		6.7	6.7	18.9	46.7	33.3	6.7	20	21.1	10.6	0	18.9	32.2	18.9	6.7	6.7	21.1	33.3	18.9	1	1	2	4	3	1	2	2	2	0
EG14108	>EG14108 yfcE Phosphodiesterase, function unknown	Cytoplasmic	A					0.722515	n.def	1.76415	n.def	n.def	n.def		n.def	n.def	n.def	n.def	n.def	n.def		14.1	14.1	8.2	14.1	14.1	0	14.1	6	14.1	8.2	14.1	14.1	14.1	6	14.1	0	8.2	8.2	2	2	1	2	2	0	2	1	2	1
EG14111	>EG14111 yfcH Predicted NAD-dependent nucleotide-sugar epimerase	Cytoplasmic	A					n.def	n.def	n.def	n.def	n.def	n.def		n.def	n.def	n.def	n.def	n.def	n.def		0	0	0	0	0	0	4	0	4	0	0	0	0	0	0	0	0	0	0	0	0	0	0	0	1	0	1	0
EG14115	>EG14115 yfcL Function unknown	Cytoplasmic	A					n.def	n.def	n.def	n.def	n.def	n.def		n.def	n.def	n.def	n.def	n.def	n.def		0	0	0	0	0	0	0	0	0	0	10.9	10.9	0	10.9	0	0	0	0	0	0	0	0	0	0	0	0	0	0
EG14116	>EG14116 epmC Elongation Factor P Lys34 hydroxylase	Cytoplasmic	A					1.3791	n.def	n.def	n.def	n.def	n.def		n.def	n.def	n.def	n.def	n.def	n.def		9.9	9.9	9.9	9.9	9.9	9.9	9.9	9.9	9.9	9.9	0	0	0	0	0	0	0	0	1	1	1	1	1	1	1	1	1	1
EG14117	>EG14117 smrB Predicted DNA endonuclease, function unknown	Cytoplasmic	A					n.def	n.def	n.def	n.def	n.def	n.def		n.def	n.def	n.def	n.def	n.def	n.def		14.8	14.8	0	0	21.3	6.6	21.3	6.6	6.6	0	0	0	0	0	0	0	0	0	1	1	0	0	2	1	2	1	1	0
EG14129	>EG14129 yfcZ Function unknown, UPF0381 family	Cytoplasmic	A					3.44927	n.def	1.4429	n.def	2.61253	n.def		n.def	n.def	n.def	n.def	n.def	n.def		0	13.8	13.8	27.7	27.7	0	27.7	27.7	0	0	0	13.8	27.7	0	13.8	13.8	13.8	13.8	0	1	1	2	2	0	2	2	0	0
EG14165	>EG14165 yfeX Porphyrinogen oxidase, cytoplasmic	Cytoplasmic	A					n.def	n.def	n.def	n.def	n.def	n.def		n.def	n.def	n.def	n.def	n.def	n.def		0	6.4	6.4	16.7	0	10.4	6.4	10	0	4	4.7	10.4	4	4	4.7	6.4	10.4	7.4	0	1	1	4	0	2	1	2	0	1
EG14169	>EG14169 zipA FtsZ stabilizer	Integral Inner Membrane	B		Yes			1.64588	n.def	FtsH only	FtsH only	2.88309	n.def		1.25266	0.30955	0.918174	0.631238	1.15016	0.421483		7.3	8.8	8.5	11.3	13.4	25.3	18	5.8	13.4	5.8	8.8	6.1	6.1	6.1	8.8	6.1	6.1	6.1	1	3	2	3	3	5	4	1	3	1
EG14193	>EG14193 maeB Malic enzyme, NADP-dependent	Peripheral inner membrane protein facing the cytoplasm	F1			Yes		2.45471	n.def	1.6173	n.def	FtsH only	FtsH only		n.def	n.def	n.def	n.def	n.def	n.def		2	5.8	10.3	7.5	10.8	15.2	19.5	10.4	7.8	5.4	5.1	13.3	3.8	11.6	10.8	7.5	9.6	5.5	1	3	6	3	5	6	9	5	4	3
EG14197	>EG14197 ypfJ Function unknown	Integral Inner Membrane	B					n.def	n.def	n.def	n.def	n.def	n.def		n.def	n.def	n.def	n.def	n.def	n.def		0	0	0	0	0	0	0	0	0	4.5	0	4.9	0	4.9	0	0	0	0	0	0	0	0	0	0	0	0	0	1
EG14198	>EG14198 alaC Valine--pyruvate aminotransferase 3	Cytoplasmic	A	Yes	Yes	Yes		4.39252	0.0226874	2.88482	0.00476582	4.74671	0.00104485		0.838825	0.686726	1.25869	0.55496	1.05582	0.861395		8.3	12.6	12.4	16	17	16	22.6	8	13.3	5.3	6.3	7.5	7.5	3.6	10.2	7.5	12.4	3.6	3	4	4	5	6	5	7	3	5	2
EG14199	>EG14199 yfgC Periplasmic predicted metalloprotease, required for LoiP localization	Periplasmic	G					n.def	n.def	n.def	n.def	n.def	n.def		n.def	n.def	n.def	n.def	n.def	n.def		0	0	4.3	0	4.3	0	1.8	0	5.7	0	0	0	0	0	0	0	0	0	0	0	1	0	1	0	1	0	1	0
EG14207	>EG14207 der Multicopy suppressor of ftsJ, GTPase, ribosome biogenesis	Peripheral inner membrane protein facing the cytoplasm	F1					1.76895	0.26564	0.934893	0.588514	0.887988	0.755432		0.74717	0.369752	0.749981	0.107942	0.560363	0.11145		12.4	21	19.4	14.5	21.2	21	16.5	15.1	16.7	6.1	6.7	15.1	12.7	4.3	23.3	20.8	18.6	22.7	5	7	7	4	7	7	5	5	6	3
EG14208	>EG14208 bamB Beta-propeller lipoprotein in OM biogenesis BamABCDE complex	Outer Membrane Lipoprotein	I					2.49252	n.def	n.def	n.def	7.54994	n.def		n.def	n.def	n.def	n.def	n.def	n.def		4.1	8.2	4.6	0	4.1	4.1	0	7.7	7.7	7.1	4.1	0	0	4.1	0	0	4.1	5.6	1	2	1	0	1	1	0	2	2	2
EG14209	>EG14209 yfgM Putative anti-RcsB factor	Integral Inner Membrane	B					1.78647	0.608874	0.906883	0.672584	0.988532	0.635927		0.811124	0.159506	0.754012	0.0144172	0.611597	0.00711357		32.5	47.1	47.1	46.6	35.4	46.6	46.6	35.4	46.6	40.8	35.4	46.6	35.4	35.4	46.6	46.6	46.6	39.8	3	6	6	5	4	5	5	4	5	5
EG14222	>EG14222 bamD TPR-repeat lipoprotein required for OM biogenesis	Outer Membrane Lipoprotein	I					n.def	n.def	n.def	n.def	0.129745	n.def		n.def	n.def	n.def	n.def	n.def	n.def		0	13.5	12.2	22.4	0	5.3	7.3	12.7	12.7	0	0	12.2	4.9	12.7	7.3	15.5	7.3	7.3	0	2	2	4	0	1	1	2	2	0
EG14238	>EG14238 ylaC Inner membrane protein, DUF1449 family, function unknown	Integral Inner Membrane	B					n.def	n.def	n.def	n.def	n.def	n.def		n.def	n.def	n.def	n.def	n.def	n.def		17.3	0	0	0	0	0	0	0	0	0	0	0	0	0	0	0	0	0	2	0	0	0	0	0	0	0	0	0
EG14239	>EG14239 maa Maltose O-acetyltransferase	Cytoplasmic	A	Yes	Yes	Yes		FtsH only	FtsH only	FtsH only	FtsH only	FtsH only	FtsH only		1.28638	0.361394	0.761374	0.421622	0.979414	0.950573		31.1	19.1	26.8	42.6	26.8	26.8	38.3	26.8	24.6	7.7	7.7	7.7	7.7	7.7	0	12.6	0	19.1	4	2	3	5	3	3	4	3	3	1
EG14240	>EG14240 mscK Mechanosensitive channel protein, intermediate (smaller, MscS-like) conductance, K+ regulated	Integral Inner Membrane	B					0.926056	n.def	n.def	n.def	1.563	n.def		n.def	n.def	n.def	n.def	n.def	n.def		0	1.2	3.8	1.3	0	0	0	4.9	0	2.4	1.2	2.2	3.5	1.3	1.6	0	2.6	2.2	0	1	3	1	0	0	0	4	0	2
EG14243	>EG14243 cspG Cold shock protein homolog, cold-inducible	Cytoplasmic	A					n.def	n.def	n.def	n.def	n.def	n.def		n.def	n.def	n.def	n.def	n.def	n.def		25.7	40	17.1	17.1	17.1	17.1	17.1	31.4	17.1	17.1	50	17.1	31.4	17.1	17.1	17.1	17.1	17.1	0	1	0	0	0	0	0	1	0	0
EG14263	>EG14263 folX Dihydroneopterin triphosphate epimerase, tetrahydromonapterin synthesis	Cytoplasmic	A					0.117912	n.def	1.21892	0.966765	1.92534	0.509108		1.21128	0.738419	1.51866	0.614756	1.83953	0.161217		8.3	27.5	27.5	19.2	27.5	8.3	8.3	16.7	8.3	19.2	19.2	18.3	19.2	8.3	37.5	27.5	29.2	27.5	1	3	3	2	3	1	1	2	1	2
EG14269	>EG14269 flgE Flagellar hook subunit protein	Peripheral outer membrane protein facing the extra-cellular space	F4					1.52766	n.def	1.26474	n.def	n.def	n.def		n.def	n.def	n.def	n.def	n.def	n.def		7.5	3	0	3	0	0	3	4.5	0	3	7.5	7.5	3	7.5	7.5	4.5	7.5	3	2	1	0	1	0	0	1	1	0	1
EG14287	>EG14287 ycaR Function unknown, UPF0434 family	Cytoplasmic	A					n.def	n.def	n.def	n.def	n.def	n.def		n.def	n.def	n.def	n.def	n.def	n.def		20	0	0	0	0	0	20	35	0	20	0	0	0	0	0	0	0	0	1	0	0	0	0	0	1	2	0	1
EG14322	>EG14322 tatB Protein translocase, Sec-independent	Integral Inner Membrane	B			Yes		n.def	n.def	n.def	n.def	FtsH only	FtsH only		n.def	n.def	0.67691	0.017377	n.def	n.def		6.4	8.2	14.6	8.2	14.6	14.6	14.6	14.6	23.4	0	14.6	14.6	14.6	14.6	14.6	14.6	14.6	8.2	1	1	2	1	2	2	2	2	3	0
EG14326	>EG14326 ykgM 50S ribosomal protein L31 type B	Cytoplasmic	A					0.40927	0.479218	0.301156	0.0337388	0.54169	0.239953		0.773162	0.705146	0.694559	0.418333	0.537007	0.376804		52.9	52.9	52.9	52.9	52.9	52.9	52.9	49.4	36.8	27.6	52.9	49.4	52.9	49.4	49.4	52.9	52.9	52.9	4	4	4	4	4	3	3	3	3	2
EG14345	>EG14345 ecnB Bacteriolytic lipoprotein entericidin B toxin	Outer Membrane Lipoprotein	I					n.def	n.def	n.def	n.def	n.def	n.def		n.def	n.def	n.def	n.def	n.def	n.def		0	0	0	0	0	39.6	0	0	0	0	0	0	0	0	0	0	0	0	0	0	0	0	0	1	0	0	0	0
EG20091	>EG20091 gpsA sn-Glycerol-3-phosphate dehydrogenase [NAD(P)+]	Cytoplasmic	A	Yes		Yes		FtsH only	FtsH only	1.34825	0.281422	3.36536	0.00888717		0.924367	0.75417	0.950528	0.766757	0.878637	0.500715		8.3	12.4	8.3	7.4	8.3	15.9	13	8.3	13	8.3	8.3	13.3	8.3	8.3	19.2	8.3	8.3	13.3	2	3	2	2	2	4	3	2	3	2
EG20098	>EG20098 hpt Hypoxanthine-guanine phosphoribosyltransferase	Cytoplasmic	A					1.55588	0.612171	0.877552	0.329803	0.630761	0.497962		0.968322	0.913966	0.390836	0.236605	0.378455	0.239765		34.3	29.2	23	21.9	29.2	18	25.3	16.9	18	14.6	28.1	21.9	25.3	9	19.7	19.7	14.6	29.2	6	4	4	4	5	3	3	2	3	2
EG20151	>EG20151 nfsB Nitroreductase B, oxygen-insensitive, NAD(P)H, FMN-dependent	Peripheral inner membrane protein facing the cytoplasm	F1					0.674125	0.259622	0.861853	0.595779	1.47468	0.172142		0.557332	0.234089	1.39107	0.446583	0.775291	0.325306		22.6	26.3	22.6	29	19.8	19.8	29	15.7	19.8	19.8	17.1	38.7	27.6	15.7	46.5	15.7	31.8	19.8	3	4	3	5	4	4	5	3	4	4
EG20173	>EG20173 pta Phosphate acetyltransferase, produces acetyl phosphate	Periplasmic	G	Yes		Yes		2.21057	0.0217576	1.92718	0.398259	4.58631	0.0274182		0.557504	0.529071	2.02888	0.468577	1.13111	0.637074		29	32.4	33.2	33.3	33.9	36.4	38.8	32.8	35.3	23.9	28.2	26.8	35.9	29.8	41.5	28	34	32.8	14	16	16	16	16	17	18	16	16	13
EG20227	>EG20227 thiL Thiamine monophosphate kinase, involved in thiamine salvage	Cytoplasmic	A					n.def	n.def	n.def	n.def	n.def	n.def		1.2464	0.518762	n.def	n.def	n.def	n.def		4.3	6.8	4.3	4.3	4.3	4.3	0	0	4.3	0	4.3	4.3	0	0	4.3	4.3	0	4.3	1	1	1	1	1	1	0	0	1	0
EG20253	>EG20253 xylR Transcriptional activator for xylAB, xylFGHR divergon	Nucleoid	N		Yes			n.def	n.def	FtsH only	FtsH only	n.def	n.def		n.def	n.def	1.35995	0.592266	n.def	n.def		14	10.5	13.5	12.8	15.8	5.9	11.2	3.1	18.6	7.9	0	0	0	0	5.1	0	5.1	0	4	2	3	3	4	2	3	1	5	2
EG20264	>EG20264 flgH Flagellar synthesis, basal body L-ring lipoprotein	Outer Membrane Lipoprotein	I					n.def	n.def	n.def	n.def	n.def	n.def		n.def	n.def	n.def	n.def	n.def	n.def		11.6	0	0	0	0	0	0	0	0	0	0	0	0	0	0	0	0	0	2	0	0	0	0	0	0	0	0	0
EG50001	>EG50001 rplU 50S ribosomal subunit protein L21	Ribosomal	r		Yes			2.37461	0.264381	5.35389	0.0159488	3.29908	0.134759		1.82608	0.262333	0.503285	0.109065	0.919039	0.806224		62.1	51.5	51.5	51.5	51.5	51.5	51.5	44.7	51.5	28.2	51.5	51.5	51.5	51.5	51.5	41.7	51.5	51.5	5	4	4	4	4	4	4	3	4	3
EG50002	>EG50002 rpmA 50S ribosomal subunit protein L27	Ribosomal	r		Yes	Yes		3.91475	0.236762	4.82701	0.00310559	4.27707	0.00169489		0.881958	0.737969	0.523068	0.0391495	0.461324	0.0145882		25.9	25.9	25.9	25.9	25.9	25.9	25.9	25.9	25.9	34.1	25.9	25.9	25.9	25.9	25.9	25.9	25.9	25.9	2	2	2	3	3	3	3	3	3	4
EG50003	>EG50003 acpP Acyl carrier protein ACP	Peripheral inner membrane protein facing the cytoplasm	F1		Yes	Yes		2.19465	0.100131	4.63375	0.0132742	2.75976	0.026861		1.05607	0.897636	0.402779	0.122324	0.425364	0.15184		12.8	33.3	33.3	33.3	33.3	12.8	33.3	33.3	12.8	33.3	33.3	33.3	33.3	33.3	33.3	33.3	33.3	33.3	2	3	3	3	3	2	3	3	2	3
EG50010	>EG50010 frmA Glutathione-dependent formaldehyde dehydrogenase	Peripheral inner membrane protein facing the cytoplasm	F1					0.561937	n.def	0.563295	0.314419	0.844459	n.def		1.06766	0.844606	n.def	n.def	n.def	n.def		6.5	12.5	8.9	12.2	9.8	14.4	11.9	11.1	11.9	2.2	6.5	11.9	8.7	5.4	11.9	9.8	6.5	8.7	1	2	2	3	2	4	3	3	3	1
EG50011	>EG50011 folP Dihydropteroate synthase	Cytoplasmic	A					0.875426	n.def	n.def	n.def	n.def	n.def		0.880013	0.745598	0.637954	0.277783	0.561408	0.122477		6.7	7.4	3.9	7.4	3.9	9.9	11.3	12.8	3.9	7.1	3.9	7.8	7.8	3.9	7.4	7.8	7.8	3.9	2	2	1	2	1	3	3	3	1	2
	> His6-MBP His6-MBP-tag			Yes	Yes	Yes		35.7418	8.98066e-07	31.8179	0.000318509	59.8344	9.54934e-05		1.18431	0.458918	0.953751	0.848211	1.12954	0.261636		81.9	84.5	81.9	80.6	82.9	72.1	86.8	80.6	78.3	88.9	87.6	90.4	92.8	92	90.4	90.4	92.5	90.4	34	39	31	32	28	21	30	24	28	39
[truncated: 171 more columns]
